# Supplementary material for: Continuing education for the prevention of mild cognitive impairment and Alzheimer’s-type dementia: a systematic review and overview of systematic reviews
Source: PubMed Central journal article supplement — BMJ Open. 2019 Jul 2;9(7):e027719. doi: 10.1136/bmjopen-2018-027719 (PMC6609120; doi:10.1136/bmjopen-2018-027719), 2019-07-02
Supplement: bmjopen-2018-027719.draft_revisions.pdf [file bmjopen-2018-027719.draft_revisions.pdf]

# BMJ Open

BMJ Open is committed to open peer review. As part of this commitment we make the peer review history of every article we publish publicly available.

When an article is published we post the peer reviewers' comments and the authors' responses online. We also post the versions of the paper that were used during peer review. These are the versions that the peer review comments apply to.

The versions of the paper that follow are the versions that were submitted during the peer review process. They are not the versions of record or the final published versions. They should not be cited or distributed as the published version of this manuscript.

BMJ Open is an open access journal and the full, final, typeset and author-corrected version of record of the manuscript is available on our site with no access controls, subscription charges or pay-per-view fees (<http://bmjopen.bmj.com>).

If you have any questions on BMJ Open's open peer review process please email [info.bmjopen@bmj.com](mailto:info.bmjopen@bmj.com)

# BMJ Open

## Continuing Education for the Prevention of Mild Cognitive Impairment and Alzheimer's-Type Dementia: A Systematic Review and Overview of Systematic Reviews.

|                               |                                                                                                                                                                                                                                                                                                                                                                                                                                                                                                                                                                                                                                                                                                                                                                                                                                                                                                                                                                                                                                                                                  |
|-------------------------------|----------------------------------------------------------------------------------------------------------------------------------------------------------------------------------------------------------------------------------------------------------------------------------------------------------------------------------------------------------------------------------------------------------------------------------------------------------------------------------------------------------------------------------------------------------------------------------------------------------------------------------------------------------------------------------------------------------------------------------------------------------------------------------------------------------------------------------------------------------------------------------------------------------------------------------------------------------------------------------------------------------------------------------------------------------------------------------|
| Journal:                      | <i>BMJ Open</i>                                                                                                                                                                                                                                                                                                                                                                                                                                                                                                                                                                                                                                                                                                                                                                                                                                                                                                                                                                                                                                                                  |
| Manuscript ID                 | bmjopen-2018-027719                                                                                                                                                                                                                                                                                                                                                                                                                                                                                                                                                                                                                                                                                                                                                                                                                                                                                                                                                                                                                                                              |
| Article Type:                 | Research                                                                                                                                                                                                                                                                                                                                                                                                                                                                                                                                                                                                                                                                                                                                                                                                                                                                                                                                                                                                                                                                         |
| Date Submitted by the Author: | 08-Nov-2018                                                                                                                                                                                                                                                                                                                                                                                                                                                                                                                                                                                                                                                                                                                                                                                                                                                                                                                                                                                                                                                                      |
| Complete List of Authors:     | Matyas, Nina; Donau-Universitat Krems, Department for Evidence-based Medicine and Clinical Epidemiology<br>Keser Aschenberger, Filiz; Donau-Universitat Krems, Department for Continuing Education Research and Educational Management<br>Wagner, Gernot; Donau-Universitat Krems, Department for Evidence-based Medicine and Clinical Epidemiology<br>Teufer, Birgit; Donau-Universitat Krems, Department for Evidence-based Medicine and Clinical Epidemiology<br>Auer, Stefanie; Donau-Universitat Krems, Department of Clinical Neurosciences and Preventive Medicine<br>Gisinger, Christoph; Donau-Universitat Krems, Center for Geriatric Medicine and Geriatric Nursing<br>Kil, Monika; Donau-Universitat Krems, Department for Continuing Education Research and Educational Management<br>Klerings, Irma; Donau-Universitat Krems, Department for Evidence-based Medicine and Clinical Epidemiology<br>Gartlehner, Gerald; Donau-Universitat Krems, Department for Evidence-based Medicine and Clinical Epidemiology; RTI International, Evidence-based Practice Center |
| Keywords:                     | Systematic review, Dementia < NEUROLOGY, mild cognitive impairment, PREVENTIVE MEDICINE, continuing education                                                                                                                                                                                                                                                                                                                                                                                                                                                                                                                                                                                                                                                                                                                                                                                                                                                                                                                                                                    |
|                               |                                                                                                                                                                                                                                                                                                                                                                                                                                                                                                                                                                                                                                                                                                                                                                                                                                                                                                                                                                                                                                                                                  |

SCHOLARONE™  
Manuscripts

1  
2 1 **Continuing Education for the Prevention of Mild Cognitive Impairment and**  
3  
4  
5 2 **Alzheimer's-Type Dementia: A Systematic Review and Overview of Systematic**  
6  
7  
8 3 **Reviews.**

9  
10 4 **Nina Matyas**, MD, MSc, Research Associate, Department for Evidence-based Medicine and Clinical  
11  
12  
13 5 Epidemiology, Danube University Krems<sup>1</sup>; nina.matyas@ext.donau-uni.ac.at

14  
15 6 **Filiz Keser Aschenberger**, MA, PhD, Research Associate, Department for Continuing Education  
16  
17 7 Research and Educational Management, Danube University Krems<sup>1</sup>; filiz.keser-aschenberger@donau-  
18  
19 8 uni.ac.at

20  
21 9 **Gernot Wagner**, MD, PhD, Research Associate, Department for Evidence-based Medicine and Clinical  
22  
23  
24 10 Epidemiology, Danube University Krems<sup>1</sup>; gernot.wagner@donau-uni.ac.at

25  
26 11 **Birgit Teufer**, MA, Research Associate, Department for Evidence-based Medicine and Clinical  
27  
28 12 Epidemiology, Danube University Krems<sup>1</sup>; birgit.teufer@donau-uni.ac.at

29  
30 13 **Stefanie Auer**, Professor, Department of Clinical Neurosciences and Preventive Medicine, Danube  
31  
32 14 University Krems<sup>1</sup>; Stefanie.auer@donau-uni.ac.at

33  
34 15 **Christoph Gisinger**, Professor, Center for Geriatric Medicine and Geriatric Nursing, Danube University  
35  
36 16 Krems<sup>1</sup>; christoph.gisinger@donau-uni.ac.at

37  
38 17 **Monika Kil**, Professor, Department for Continuing Education Research and Educational Management,  
39  
40 18 Danube University Krems<sup>1</sup>; monika.kil@donau-uni.ac.at

41  
42 19 **Irma Klerings**, MSc, Department for Evidence-based Medicine and Clinical Epidemiology, Danube  
43  
44 20 University Krems<sup>1</sup>; irma.klerings@donau-uni.ac.at

45  
46 21 **Gerald Gartlehner**, MD, MPH, Professor, RTI-University of North Carolina Evidence based Practice  
47  
48 22 Center, RTI International<sup>1,2</sup>; gerald.gartlehner@donau-uni.ac.at

49  
50  
51  
52  
53 23

54  
55 24 <sup>1</sup> Danube University Krems, Cochrane Austria, Dr. Karl Dorrek Straße 30, 3500 Krems, Austria

56  
57 25 <sup>2</sup> RTI International, 3040 Cornwallis Road, PO Box 12194, Research Triangle Park, North Carolina,  
58  
59 26 27709-2194, USA

1  
2 27 **Corresponding Author:** Nina Matyas, MD, MSc (nina.matyas@ext.donau-uni.ac.at)  
3

4  
5 28 **Key words:** systematic review, dementia, Alzheimer, mild cognitive impairment, prevention,  
6  
7 29 continuing education, adult education  
8

9 30 **Word count:** 3976  
10  
11

12 31  
13  
14  
15  
16  
17  
18  
19  
20  
21  
22  
23  
24  
25  
26  
27  
28  
29  
30  
31  
32  
33  
34  
35  
36  
37  
38  
39  
40  
41  
42  
43  
44  
45  
46  
47  
48  
49  
50  
51  
52  
53  
54  
55  
56  
57  
58  
59  
60

For peer review only

## 32 **ABSTRACT**

33 **Objective:** To summarize evidence on the preventive effects of continuing education on mild  
34 cognitive impairment and Alzheimer's-type dementia.

35 **Design:** Systematic review and overview of systematic reviews.

36 **Data sources:** We systematically searched MEDLINE, PsycINFO, EMBASE, CENTRAL, CINAHL and  
37 Scopus for published studies and gray literature databases for unpublished studies from January  
38 1990 to April 2018.

39 **Methods:** To assess evidence directly addressing our objectives, we conducted a systematic review.  
40 Because we were aware of a dearth of direct evidence, we also performed an overview of systematic  
41 reviews on leisure activities that mimic formal continuing education. We a priori established inclusion  
42 and exclusion criteria. Two authors independently assessed inclusion and exclusion on abstract and  
43 full-text level, rated risk of bias, and determined the certainty of evidence using GRADE (Grading of  
44 Recommendations Assessment, Development and Evaluation). We resolved all discrepancies by  
45 consensus. We synthesized the available evidence narratively.

46 **Results:** Our searches identified 4933 citations. For the systematic review, two publications on the  
47 same prospective cohort study (Tasmanian Healthy Brain Project) met inclusion criteria; for the  
48 overview of reviews we included five systematic reviews. Based on 459 participants, preliminary data  
49 of the ongoing cohort study indicated that cognitive reserve statistically significantly increased in  
50 persons attending university classes compared to the control group (92.5% vs. 55.7%). Likewise,  
51 language processing capacities statistically significantly improved. Episodic memory, working  
52 memory, and executive function did not differ significantly between groups.  
53 Systematic reviews consistently reported a positive association between participation in cognitively  
54 stimulating leisure activities and reduced incidence of dementia and improved cognitive test  
55 performance.

56 **Conclusion:** Available results demonstrate that cognitive reserve increases through continuing  
57 education and show a positive association of cognitive leisure activities with both improved cognitive  
58  
59  
60

1  
2 58 function and lower dementia incidence. Healthcare providers and policymakers should promote a  
3  
4 59 healthy lifestyle, which also includes being cognitively active throughout life.

5  
6 60 **Systematic review registration:** PROSPERO CRD42017063944  
7

8  
9 61

10  
11 62

12  
13 63 **Strengths and Limitations of this study:**

- 14  
15 64 • This is the first systematic review assessing the benefits and harms of continuing education  
16  
17 65 on the prevention of mild cognitive impairment or Alzheimer's type dementia.  
18  
19 66 • This is the first overview of systematic reviews presenting an up-to-date summary of  
20  
21 67 currently available research in the field of cognitive leisure activities and dementia.  
22  
23 68 • The certainty of evidence is low, indicating that future studies might have a substantial  
24  
25 69 impact on results of our review.  
26  
27 70 • Measurements and types of cognitive leisure activities differed widely across studies and  
28  
29 71 quantitative analysis were often not possible.  
30  
31 72 • The majority of included systematic reviews have serious methodological shortcomings.  
32  
33  
34  
35  
36  
37  
38  
39  
40  
41  
42  
43  
44  
45  
46  
47  
48  
49  
50  
51  
52  
53  
54  
55  
56  
57  
58  
59  
60

## 75 INTRODUCTION

76 In 2012, the World Health Organization (WHO) named the prevention and control of  
77 neurocognitive disorders such as mild cognitive impairment or Alzheimer's-type dementia a global  
78 public health priority.<sup>1</sup> Alzheimer's-type dementia is the most common form of dementing illnesses.<sup>1</sup>  
79 In 2015, 47.5 million people worldwide lived with Alzheimer's disease or another closely related  
80 dementing illness.<sup>2</sup> As a consequence of the rapidly aging world population, the prevalence is  
81 projected to rise up to 135.5 million patients in 2050.<sup>2</sup>

82 The progressive loss of independent functioning of patients with Alzheimer's-type dementia,  
83 leads to an enormous social and economic burden. In 2017, the U.S. economic burden associated  
84 with Alzheimer's type dementia was estimated to be 259 billion U.S. Dollars<sup>3</sup> the total global costs for  
85 dementia were 818 billion in 2015.<sup>4</sup>

86 The Diagnostic and Statistical Manual (DSM-5) characterizes Alzheimer's disease as a  
87 significant decline of intellectual abilities in one or more cognitive domains (learning and memory,  
88 language, executive function, complex attention, perceptual motor function, social cognition) outside  
89 the context of delirium.<sup>5</sup>

90 Any dementia diagnosis, however, is frequently preceded by a long period of subclinical  
91 neuropathological disorder with subjective cognitive disorder (SCI) and mild cognitive disorder (MCI)  
92 as a transition phase before diagnostic criteria for dementia are fulfilled.<sup>6</sup> If cognitive decline  
93 progresses to a degree that a person's capability of carrying out everyday activities is significantly  
94 affected, this state is called major neurocognitive disorder.<sup>5 6</sup>

95 The risk of developing neurocognitive disorders increases substantially with age. The  
96 prevalence of Alzheimer's type dementia is 3.5% in persons aged 75 or older and 46.3% in those 95  
97 years or older.<sup>7</sup> Other risk factors contributing to the development of the disease are not yet  
98 thoroughly understood. In recent years, epidemiological studies have linked the development of  
99 dementia with risk factors such as low educational level, unhealthy diet, decreased physical activity,  
100 and smoking.<sup>8 9</sup> In addition, potential predictors of dementia are chronic medical conditions such as

1  
2 101 cardiovascular diseases, diabetes, obesity, cancers, depression, thyroid disorder, or genetic factors.<sup>10</sup>  
3  
4 102 However, some studies found a protective association of cognitively stimulating activities, such as  
5  
6 103 learning a new language in middle age, with a slower cognitive decline during late life.<sup>11-15</sup> Such  
7  
8 104 results underpin the “cognitive reserve hypothesis”.<sup>16-18</sup> According to this theory, through every  
9  
10 105 activity that stimulates the brain, the cognitive reserve gets boosted and the resistance towards any  
11  
12 106 dementia-related brain pathology increases.<sup>19</sup> In animal trials, an enriched environment was  
13  
14 107 associated with increased cortical thickness.<sup>20</sup> Epidemiological research on humans has shown that  
15  
16 108 education<sup>21</sup> and probably also other forms of intellectual stimulation, during the whole lifespan, is  
17  
18 109 associated with a lower risk to develop dementia.<sup>22,23</sup> A larger cognitive reserve acquired by  
19  
20 110 continuing education activities, thus, might protect against cognitive decline.<sup>19,24</sup>  
21  
22  
23  
24

25 111 For this systematic review, we define continuing education as structured learning activities  
26  
27 112 and programs provided by formal and non-formal educational institutions for persons beyond the  
28  
29 113 age of compulsory schooling. These activities are designed to help individuals satisfy learning needs  
30  
31 114 and interests, to enrich knowledge, to develop and improve abilities and skills, and to foster  
32  
33 115 personality, social competences, families, networks, health, and professional life. Continuing  
34  
35 116 education is voluntary, and based on topics and courses that are not directly connected to any  
36  
37 117 special job position or vocational training.<sup>25-30</sup>  
38  
39  
40

## 41 118 **Rationale**

42  
43  
44 119 To date, the preventive effect of continuing education on cognitive impairment and Alzheimer’s-type  
45  
46 120 dementia has not been assessed in an objective and systematic way. The aim of our review was to  
47  
48 121 summarise the evidence investigating the preventive effects of continuing education on the  
49  
50 122 development of cognitive impairment and Alzheimer’s-type dementia.  
51

52  
53 123 Our systematic review addressed the following questions:  
54  
55  
56  
57  
58  
59  
60



1  
2 124 **Key question 1a:** In adults 45 years of age or older with normal cognition or merely subjective  
3  
4 125 cognitive impairment, does continuing education lead to a reduction in the risk of mild cognitive  
5  
6 126 impairment or Alzheimer's-type dementia compared with no continuing education?  
7  
8

9 127 **Key question 1b:** (In case no evidence on continuing education is available or the evidence is sparse):  
10  
11 128 In adults 45 years of age or older with normal cognition or merely subjective cognitive impairment,  
12  
13 129 do leisure activities lead to a reduction in the risk of mild cognitive impairment or Alzheimer's-type  
14  
15 130 dementia compared with no continuing education?  
16  
17

18 131 **Key question 2:** What are potential harms of continuing education?  
19  
20

21 132 **Key question 3:** Do benefits and harms differ by subgroups based on age, sex/gender, race or  
22  
23 133 ethnicities, level of education, or duration of intervention?  
24  
25

26 134 **Key question 4:** What is the optimal age to start continuing education to prevent mild cognitive  
27  
28 135 impairment or dementia?  
29  
30

31 136

## 33 137 **METHODS**

### 36 138 **Design**

37  
38 139 Throughout this manuscript we followed the PRISMA (Preferred Reporting Items for  
39  
40 140 Systematic Reviews and Meta-Analyses) statement<sup>31</sup> (See supplementary file 1). The protocol of this  
41  
42 141 systematic review was published<sup>32</sup> and registered in PROSPERO (International Prospective Register of  
43  
44 142 Systematic Reviews) (Registration number CRD42017063944). Figure 1 depicts the analytic  
45  
46 143 framework that guided our systematic review.  
47  
48

49 144 [Figure 1 about here]

50  
51  
52 145 We addressed our research questions with two different methodological approaches:  
53

- 54 146 1) We performed a systematic review of primary studies to assess the preventive  
55  
56 147 effects and potential harms of continuing education provided by formal and non-formal  
57  
58 148 institutions (key questions 1a, 2, 3, and 4)  
59  
60

1  
2 149 2) We conducted an overview of systematic reviews to determine the preventive effects  
3  
4 150 and potential harms of related leisure activities (e.g. playing cards, reading books, etc., key  
5  
6 151 question 1b).

7  
8 152 We chose this two-step approach because studies in the field of continuing education and  
9  
10 153 dementia are very rare. Certain leisure activities, however, are able to mimic continuing education  
11  
12 154 regarding content (e.g. learning a new language privately versus learning a new language as an  
13  
14 155 organized educational activity). Leisure activities are not our primary focus of interest but can be  
15  
16 156 considered as surrogate interventions for continuing education in some circumstances.  
17  
18  
19  
20 157

## 21 22 158 **Study selection**

### 23 24 159 **Eligibility criteria for the systematic review**

25  
26 160 The population of interest were adults 45 years or older, without a clinical diagnosis of  
27  
28 161 cognitive impairment at the time of study recruitment, which included people with subjective  
29  
30 162 cognitive impairment. Eligible interventions comprised of all cognitive activities that are provided by  
31  
32 163 formal and non-formal educational institutions. These activities include classes, courses, and  
33  
34 164 trainings that are based on individual interests and that are attended voluntarily. We included  
35  
36 165 randomized controlled trials, nonrandomized controlled trials, prospective controlled cohort studies,  
37  
38 166 retrospective controlled cohort studies, and case-control studies. All nonrandomized studies needed  
39  
40 167 to have a minimum sample size of 300 or more participants.  
41  
42  
43  
44

45 168 Eligible studies had a minimum follow up time of 1 year and a minimum duration of  
46  
47 169 intervention of 3 months. We excluded studies that investigated formal (vocational) education (e.g.  
48  
49 170 School or College), physical activities, and all job-related courses and trainings.

50  
51 171 Outcomes of interest included patient-relevant health outcomes such as incidence of  
52  
53 172 dementia, incidence of MCI, psychological wellbeing, functional capacity, quality of life, and other  
54  
55 173 relevant health outcomes; in addition, we included intermediate outcomes such as cognitive  
56  
57 174 functioning, cognitive (test) performance, or social inclusion. For the purpose of our study, mild  
58  
59  
60

1  
2 175 cognitive impairment refers to “amnesic” mild cognitive impairment (aMCI), meaning that memory  
3  
4 176 loss is the predominant symptom.<sup>33</sup>  
5  
6

## 7 177 **Eligibility criteria for the overview of systematic reviews**

8  
9 178 Eligibility criteria for population and outcomes for the overview of systematic reviews were  
10  
11 179 the same as for the systematic review. Eligible interventions were leisure activities that are  
12  
13 180 cognitively stimulating and mimic the content of continuing education but in an informal setting. Just  
14  
15 181 as in the systematic review, we excluded physical activities. Eligible study designs were exclusively  
16  
17 182 systematic reviews and meta-analyses. We excluded reviews with searches conducted before 2013.  
18  
19

20 183 Further details about our inclusion and exclusion criteria can be found in our protocol<sup>32</sup> and  
21  
22 184 in the supplementary file 2.  
23  
24  
25

## 26 185 **Search strategy**

27  
28 186 We systematically searched Ovid MEDLINE, Cochrane Library, Embase, PsycINFO, CINAHL  
29  
30 187 (Cumulative Index to Nursing and Allied Health Literature), ALOIS (the Cochrane Dementia and  
31  
32 188 Cognitive Improvement Group Specialized Register), and ERIC (Education Resources Information  
33  
34 189 Center) from January 1990 to April 2018 to identify relevant publications (see supplementary file 3  
35  
36 190 for the search strategy). For the overview of reviews, we searched Epistemonikos from inception to  
37  
38 191 April 2018 in addition to the above mentioned databases (see supplementary file 4).  
39  
40  
41

42 192 An experienced information specialist developed an appropriate search strategy using a  
43  
44 193 combination of medical subject headings (MeSH<sup>®</sup>) and title and abstract keywords, limiting the  
45  
46 194 search to human-only studies without applying any language limitations. The electronic Ovid Medline  
47  
48 195 search strategy was peer-reviewed by another information specialist following the PRESS (peer  
49  
50 196 review of the electronic search strategy) statement.<sup>34</sup> For the systematic review, we searched for  
51  
52 197 gray literature in ClinicalTrials.gov, the World Health Organization’s International Clinical Trials  
53  
54 198 Registry Platform, web pages of relevant organizations, and a dissertation database (“Digital Access  
55  
56 199 to Research Theses”, [DART-Europe](#)). Additionally, in an attempt to avoid retrieval bias, we manually  
57  
58  
59  
60

1  
2 200 searched the reference lists of landmark studies and background articles on this topic to look for any  
3  
4 201 relevant citations that our electronic searches might have missed. We imported all citations into an  
5  
6 202 electronic database (EndNote X.8) and deleted duplicates.  
7  
8

### 9 203 **Study selection**

10  
11 204 Two review authors independently screened abstracts and relevant full text articles for  
12  
13 205 eligibility, using Covidence Software.<sup>35</sup> They resolved disagreements by discussion or by consultation  
14  
15 206 with a third author.  
16  
17

### 18 19 207 **Data abstraction**

20  
21  
22 208 We designed, pilot-tested, and used a data abstraction form to gather pertinent information  
23  
24 209 from each article. One author extracted relevant data from each study that met our inclusion criteria.  
25  
26 210 A second author of the team cross-checked data abstractions for completeness and accuracy. We  
27  
28 211 extracted study information (author, publication year, years covered by searches, location/setting,  
29  
30 212 number of included studies and included study designs), sample size, study characteristics  
31  
32 213 (population, interventions, and comparators), outcome measurements, and results. For systematic  
33  
34 214 reviews we abstracted summary estimates of meta-analyses whenever available.  
35  
36  
37

### 38 215 **Risk of bias assessment**

39  
40 216 Two investigators independently assessed the risk of bias of included studies. They resolved  
41  
42 217 any disagreements by consensus or by consulting a third team member. For eligible non-randomized  
43  
44 218 studies we used the ROBINS-I (Risk Of Bias In Non-randomized Studies - of Interventions) tool.<sup>36</sup> For  
45  
46 219 the assessment of eligible systematic reviews, we used the AMSTAR (Assessing the Methodological  
47  
48 220 Quality of Systematic Reviews) tool.<sup>37</sup> Detailed risk of bias ratings of included articles are given in  
49  
50 221 supplementary file 5.  
51  
52  
53  
54

### 55 222 **Data synthesis and statistical analysis**

56  
57 223 We narratively summarized evidence from included studies. If available, we present effect  
58  
59 224 estimates of systematic reviews. For the incidence of dementia we present hazard ratios (HR), odds  
60

1  
2 225 ratios (OR), and risk ratios (RR). A value below 1 represents a lower risk for the intervention, a value  
3  
4 226 greater than 1 indicates a lower risk for the control group; an estimate of 1 means no difference  
5  
6 227 between intervention and control. For the assessment of cognitive test performance we use  
7  
8 228 standardized mean differences because scales for measurements differed in the individual studies. A  
9  
10 229 standardized mean difference of 0 indicates that both groups had the same cognitive test  
11  
12  
13 230 performance.

### 16 231 **Certainty of evidence**

17  
18 232 We followed the recommendations of the GRADE (Grading of Recommendations  
19  
20 233 Assessment, Development and Evaluation) working group for rating the certainty of evidence for  
21  
22  
23 234 each outcome.<sup>38</sup>

### 26 235 **Patient involvement**

27  
28 236 No patients were involved in the development of this research paper.  
29  
30  
31  
32 237

## 34 238 **RESULTS**

35  
36 239 Our search identified in total 4933 citations after exclusion of duplicates. Based on title and  
37  
38 240 abstract review, we considered 58 primary studies and 28 systematic reviews for full-text review.  
39  
40 241 After scrutinising the full-text articles, we included two primary studies<sup>39 40</sup> and five systematic  
41  
42 242 reviews.<sup>41-45</sup> Figure 2 and figure 3 depict the study selection process. Supplementary file 6 provides a  
43  
44 243 list of excluded studies at full-text level.  
45  
46

47 244 [Figure 2 and figure 3 about here]  
48  
49

### 50 245 **Study characteristics**

#### 52 246 **Systematic Review**

53  
54 247 We included two publications<sup>39 40</sup> that present interim findings of the same medium risk of  
55  
56 248 bias prospective cohort study, namely the Tasmanian Healthy Brain Project that plans to follow  
57  
58 249 participants for 10-20 years.<sup>46</sup> The two publications analysed different aspects of cognitive  
59  
60

1  
2 250 functioning of the same 459 participants who did or did not engage in a 12 month, part-time or full-  
3  
4 251 time university-level education. Participants' mean age was 59.6±7 (mean±SD) years in the  
5  
6 252 intervention group and 62.4±6 years in the control group with a follow-up period of 4 years.  
7  
8 253 Participants completed a neuropsychological test battery, consisting of 14 tests each year.<sup>46</sup>  
9

10  
11 254 In this study, selection bias is likely because participants voluntarily opted for university  
12  
13 255 courses or no further education. It is not clear if investigators used appropriate methods to adjust for  
14  
15 256 potential confounders (See supplementary file 5 for risk of bias ratings).  
16  
17

## 18 257 **Overview of Reviews**

19  
20  
21 258 All five included systematic reviews investigated the benefits of cognitive leisure activities in  
22  
23 259 adults over the age of 45 years.<sup>41-45</sup> Four studies included any cognitive leisure activities in their  
24  
25 260 analyses (e.g. reading books, doing crosswords, attending cultural events, knitting, painting), one  
26  
27 261 study<sup>44</sup> specifically focused on the benefits of playing video games in older adults. The number of  
28  
29 262 participants investigated in the reviews ranged from 913<sup>44</sup> to 24,554.<sup>42</sup>  
30

31  
32 263 We rated three of the included systematic reviews<sup>41 43 44</sup> as high and two studies<sup>42 45</sup> as  
33  
34 264 medium risk of bias. Reasons for the high risk of bias ratings were lack of critical appraisal of included  
35  
36 265 studies, single review of the literature, and insufficient literature searches (See supplementary file 5).  
37

38  
39 266 We graded the evidence for all meta-analysis outcomes with low certainty of evidence  
40  
41 267 mostly because of high inconsistency and indirectness among studies (See supplementary file 7).  
42

43 268 We present characteristics of included studies <sup>41-45</sup> in Table 1.  
44  
45  
46  
47  
48  
49  
50  
51  
52  
53  
54  
55  
56  
57  
58  
59  
60

| Reference                            | Risk of Bias | Search          | Study design                                                          | Population                                     | Interventions                                                                                                                                                                                  | Control                           | Outcomes                                                                                                                                                                                                                           | k of studies on cognitive leisure activities<br>n of participants |
|--------------------------------------|--------------|-----------------|-----------------------------------------------------------------------|------------------------------------------------|------------------------------------------------------------------------------------------------------------------------------------------------------------------------------------------------|-----------------------------------|------------------------------------------------------------------------------------------------------------------------------------------------------------------------------------------------------------------------------------|-------------------------------------------------------------------|
| <b>Primary Studies</b>               |              |                 |                                                                       |                                                |                                                                                                                                                                                                |                                   |                                                                                                                                                                                                                                    |                                                                   |
| Lenhan et al., 2016 <sup>40</sup>    | Medium       |                 | Prospective cohort study, Tasmanian Healthy Brain Project (2011-2016) | 50-79 years, healthy older adults              | Minimum of 12 months of part-time or full-time university study<br>Follow-up: 4 years                                                                                                          | No further education              | 55,7% in the control group vs 92,5% in the university education group showed a significant increase of <b>cognitive reserve</b>                                                                                                    | n = 459 (359 in the Intervention group, 100 control group)        |
| Thow et al., 2018 <sup>39</sup>      | Medium       |                 | Prospective cohort study, Tasmanian Healthy Brain Project (2011-2018) | 50-79 years, healthy older adults              | Minimum of 12 months of part-time or full-time university study<br>Follow-up: 4 years                                                                                                          | No further education              | Statistically significant improvement of <b>language processing capacity</b> .<br><br>No significant improvement of episodic memory, working memory, executive function.                                                           | n = 459 (359 in the Intervention group, 100 control group)        |
| <b>Systematic Reviews</b>            |              |                 |                                                                       |                                                |                                                                                                                                                                                                |                                   |                                                                                                                                                                                                                                    |                                                                   |
| Di Marco et al., 2014 <sup>41</sup>  | High         | NR to 2013      | NR                                                                    | ≥65 years, non-demented adults at baseline     | Cognitive leisure activities (assessed with self-reported questionnaires)<br><br>Time period: Past 12 months                                                                                   |                                   | No quantitative analysis<br><br>Cognitive leisure activities might be associated with <b>reduced incidence of all-cause dementia</b>                                                                                               | k = 6<br>n = NR                                                   |
| Opdebeeck et al., 2016 <sup>42</sup> | High         | NR to 2014      | 31 Cross-sectional studies                                            | ≥60 years (at least 80% of study participants) | Cognitive leisure activities (assessed with self-reported questionnaires)<br><br>Time period: currently, mid-life, late-life                                                                   |                                   | SMD 0.26 (95% CI 0.21-0.32)<br><br>Participating in cognitive leisure activities is associated with <b>improved cognitive functions</b> (including memory, working memory, executive function, visuospatial ability, and language) | k = 31<br>n = 24561                                               |
| Sajeev et al., 2016 <sup>43</sup>    | Medium       | NR to June 2014 | 10 prospective cohort studies; 2 nested case-control studies          | ≥45 years                                      | Leisure activities that require information seeking and processing (assessed with self-reported questionnaires)<br><br>Time period: current, early, mid and late life                          |                                   | No quantitative analysis<br><br>Late-life cognitive activity might be associated with <b>lower AD and/or all-cause dementia incidence</b>                                                                                          | k = 12<br>n = 13939 (dementia: 1663 AD: 565)                      |
| Toril et al., 2014 <sup>44</sup>     | High         | 1986-2013       | 18 controlled studies<br>2 uncontrolled studies                       | 50 - 86 years, healthy older adults            | Video Game training<br><br>Games: Medal of Honor, Pac Man, Donkey Kong, Tetris, Crystal castle, Nintendo Brain Training, Brain Age, Big Brain Academy, etc.<br>Pre- and post training measures | active and passive control groups | SMD 0.37 (95% CI 0.26 – 0.48)<br><br>Video game training is associated with <b>improved cognitive functions</b> in older adults (including memory, attention, reaction time, cognitive function, executive functions)              | k = 20<br>n = 913 (474 trained, 439 healthy controls)             |
| Yates et                             | Medium       | 2004 -          | 17 Cohort studies                                                     | ≥ 46 years,                                    | Unstructured leisure activities                                                                                                                                                                |                                   | <b>All-cause dementia incidence:</b>                                                                                                                                                                                               | k = 19                                                            |

1  
2  
3 269  
4  
5  
6 270  
7 271  
8 272  
9 273  
10 274

|                         |  |      |                        |                                                                          |                                                        |  |                                                                                                                                                                                                                                                           |           |
|-------------------------|--|------|------------------------|--------------------------------------------------------------------------|--------------------------------------------------------|--|-----------------------------------------------------------------------------------------------------------------------------------------------------------------------------------------------------------------------------------------------------------|-----------|
| al., 2016 <sup>45</sup> |  | 2014 | 2 Case control studies | cognitively healthy adults (i.e. no diagnosis of impairment or dementia) | which elicit a “mental response” from the Participant. |  | RR 0.61 (95%CI 0.42 – 0.90), k=3, RE<br>HR 0.58 (95%CI 0.46 – 0.74), k=2, RE<br>OR 0.78 (95%CI 0.67 – 0.90), k=2, FE<br><br><b>Cognitive impairment incidence:</b><br>OR 0.69 (95%CI 0.56 – 0.85), k=5, RE<br>HR 0.85 (95% CI 0.71 – 1.02), k=3, RE, n.s. | n = 32546 |
|-------------------------|--|------|------------------------|--------------------------------------------------------------------------|--------------------------------------------------------|--|-----------------------------------------------------------------------------------------------------------------------------------------------------------------------------------------------------------------------------------------------------------|-----------|

NR = Not reported, AD = Alzheimer’s-type dementia, k = studies that assessed cognitive activities only, n= number of participants, RE = random-effects model, FE = fixed effects model, n.s. = not significant

**Table 1: Study Characteristics of included primary studies and systematic reviews**

For peer review only

11  
12  
13  
14  
15  
16  
17  
18  
19  
20  
21  
22  
23  
24  
25  
26  
27  
28  
29  
30  
31  
32  
33  
34  
35  
36  
37  
38  
39  
40  
41  
42  
43  
44  
45  
46



## 275 **Outcomes**

### 276 **Key question 1a: Continuing education**

277 Two interim analyses of the Tasmanian Healthy Brain Project focused on language  
278 processing<sup>39</sup> and cognitive reserve<sup>40</sup> after 4 years of follow-up. To date, no results on the incidence of  
279 mild cognitive impairment or Alzheimer's-type dementia are available yet. Both studies reported  
280 beneficial effects of continuing education. Thow and colleagues<sup>39</sup> showed that attending university  
281 courses over a period of 12 months statistically significantly ( $p < 0.05$ ) improved language processing  
282 capacity in the intervention group compared to the control group. No statistically significant  
283 differences were detected for episodic memory, working memory, and executive function between  
284 groups. In all analyses, authors accounted for age and prior cognitive reserve (education, pre-existing  
285 intellectual capacity, life-experience).

286 Lenehan and coworkers<sup>40</sup> demonstrated by conducting growth mixture modeling that the  
287 cognitive reserve statistically significantly increased in 92.5% of participants in the intervention group  
288 ( $n=359$ ) compared to 55.7% of participants in the control group ( $n=100$ ). Investigators created a  
289 proxy measure of "current cognitive reserve" to capture dynamic changes in cognitive reserve over  
290 time, including intellectual capacity and academic ability.<sup>47</sup>

### 291 **Key question 1b: Cognitive leisure activities**

292 Overall, the five included systematic reviews showed consistently that participation in  
293 cognitive stimulating leisure activities can reduce the risk of developing mild cognitive impairment or  
294 Alzheimer's-type dementia and improves cognitive functioning of healthy older adults.

295 Two systematic reviews<sup>41,43</sup> investigated the impact of cognitive leisure activities on the  
296 incidence of Alzheimer's-type dementia. Both studies concluded that leisure activities protect against  
297 dementia. Due to different categorization of cognitive leisure activities and a high heterogeneity  
298 between studies, quantitative analyses were not possible in the two reviews. The effect estimates of  
299 included studies ranged from hazard ratios [HR] of 0.39 (95% CI: 0.21 - 0.71)<sup>48</sup> to HR of 0.93 (95% CI:  
300 0.88 - 0.98)<sup>49</sup> showing a reduced risk of Alzheimer's-type dementia when carrying out leisure

1  
2 301 activities. Sajeev et al.<sup>43</sup> performed an extensive bias analysis showing that it is unlikely that the  
3  
4 302 observed positive effects of cognitively stimulating activities on dementia incidence are exclusively  
5  
6 303 explained by unmeasured confounders or reverse causation.  
7

8  
9 304 One review<sup>45</sup> assessed both incidence of mild cognitive impairment and Alzheimer's-type  
10  
11 305 dementia and cognitive test performance. The authors conducted five meta-analyses based on  
12  
13 306 groups for outcomes and reported effect estimates (risk ratio [RR], odds ratio [OR], and hazard ratio  
14  
15 307 [HR]). Four out of five meta-analyses revealed statistically significant results showing that cognitive  
16  
17 308 leisure activities were associated with a reduction of dementia incidence (RR = 0.61, 95% CI: 0.42-  
18  
19 309 0.90, p=0.01; HR = 0.58, 95% CI: 0.46-0.74, p=0.00, OR = 0.78, 95% CI: 0.67 – 0.90) and a reduction of  
20  
21 310 cognitive impairment incidence (OR = 0.69, 95% CI: 0.56 – 0.85, p=0.00). However, one meta-  
22  
23 311 analysis, combining three cohort studies did not reach statistical significance (HR = 0.85, 95% CI: 0.71-  
24  
25 312 1.02, p=0.08) for reduction of cognitive impairment. A narrative analysis of primary studies assessing  
26  
27 313 cognitive test performance showed a statistically significant improvement of memory, speed of  
28  
29 314 processing, language, and executive functioning and overall later life cognition.  
30  
31

32  
33 315 Two other included studies<sup>42 44</sup>, both rated as high risk of bias, focused on cognitive test  
34  
35 316 performance. Opdebeeck et al.<sup>42</sup> reported a benefit in overall cognitive abilities for the group  
36  
37 317 involving in cognitive leisure activities (standardized mean difference [SMD] of 0.26 (95% confidence  
38  
39 318 interval [CI]: 0.21-0.32). The cognitive domains included memory, working memory, executive  
40  
41 319 function, visuospatial ability, and language. According to the review by Toril et al. <sup>44</sup>, playing video  
42  
43 320 games enhances several cognitive functions. They observed a SMD of 0.37 (95% CI 0.26 – 0.48) for  
44  
45 321 global cognitive function (combining results for memory, attention, reaction time and executive  
46  
47 322 functions), showing a benefit for the intervention group.  
48  
49

### 50 51 323 **Key question 2: Harms**

52  
53 324 We found no evidence regarding harms of continuing education or cognitive leisure activities.  
54  
55

### 56 57 325 **Key question 3: Subgroups**

1  
2 326 Toril and colleagues<sup>44</sup> performed several subgroup analyses. The study revealed that the age  
3  
4 327 of the participants and the number of video game training sessions significantly changed the effect  
5  
6 328 size. Older participants (between 71 and 80 years) seemed to benefit more from computer training  
7  
8 329 than younger participants (60 to 70 years). For the improvement of cognitive test performance,  
9  
10 330 shorter training sessions (1-6 weeks) seemed to show an advantage over longer training  
11  
12 331 interventions (7-12 weeks). By contrast, for incidence of Alzheimer's-type dementia, DiMarco et al.<sup>41</sup>  
13  
14 332 and Sajeev et al.<sup>43</sup> infer from their data that greater participation in cognitive leisure activities over a  
15  
16 333 longer period of time contributes positively to the protective effect.  
17  
18  
19

20 334 **Key question 4: Optimal age**

21  
22 335 No study specifically discussed the optimal age to start with continuing education activities or  
23  
24 336 cognitive leisure activities to prevent mild cognitive impairment or dementia.  
25  
26  
27  
28  
29  
30  
31  
32  
33  
34  
35  
36  
37  
38  
39  
40  
41  
42  
43  
44  
45  
46  
47  
48  
49  
50  
51  
52  
53  
54  
55  
56  
57  
58  
59  
60

1  
2 337 **DISCUSSION**

3  
4 338 The evidence assessing the impact of continuing education on the risk of MCI or Alzheimer-  
5  
6 339 type dementia is limited. The only eligible primary study is still ongoing and reports findings on  
7  
8 340 intermediate outcomes only after 4 years of follow-up. Cognitive leisure activities can be viewed as  
9  
10 341 proxies for formal continuing education and provide the best available evidence on the prevention of  
11  
12 342 MCI and Alzheimer's-type dementia. Overall, the available evidence consistently indicates beneficial  
13  
14 343 effects of cognitive leisure activities by reducing incidence of MCI and Alzheimer's-type dementia and  
15  
16 344 improving cognitive function of older adults. The certainty of evidence, however, is low which means  
17  
18 345 that future studies are likely to have a substantial impact on these findings.

19  
20  
21 346 The ongoing Tasmanian Healthy Brain project<sup>46</sup> was the only cohort study that met the  
22  
23 347 eligibility criteria of our systematic review. So far, after 4 years of follow-up, this study has not  
24  
25 348 yielded results about the impact of continuing education on the incidence of MCI or Alzheimer's-type  
26  
27 349 dementia but reports promising findings on cognitive function. It demonstrated the dynamic nature  
28  
29 350 of cognitive reserve that permits changes through education even at an advanced age. Previous  
30  
31 351 studies revealed that individuals with high cognitive reserve were able to better cope with age-  
32  
33 352 related brain damage<sup>17 50</sup> and had a 46% lower risk to develop dementia.<sup>18</sup> Nevertheless, these early  
34  
35 353 findings of the Tasmanian Healthy Brain Project have to be viewed cautiously because selection bias  
36  
37 354 could potentially distort results. Participants voluntarily opted for university courses or no further  
38  
39 355 education. From the available publications, it wasn't explained sufficiently how baseline differences  
40  
41 356 such as comorbid diseases were taken into consideration during the analyses.

42  
43  
44 357 The five included systematic reviews investigating cognitive leisure activities demonstrated  
45  
46 358 both a reduction of MCI and Alzheimer's-type dementia incidence<sup>41 43 45</sup> and improvements in several  
47  
48 359 cognitive domains.<sup>42 44 45</sup> Four reviews assessed the involvement in leisure activities during the past  
49  
50 360 12 months or a much longer period. The study of Toril<sup>44</sup>, which assessed video game trainings,  
51  
52 361 however had a much shorter follow-up time and showed significant improvements in cognitive  
53  
54 362 functions, even after very short training sessions (1-6 weeks). These results could be explained by the  
55  
56 363 neuroplasticity of the human brain, which refers to the ability of the brain to adapt to every new

1  
2 364 stimulus by forming dendritic connections, creating morphological changes and increasing cognitive  
3  
4 365 reserve.<sup>51-53</sup>  
5

6 366 As far as we know, our study was the first assessing the impact of continuing education on  
7  
8 367 MCI and Alzheimer's-type dementia. It is also the first overview of systematic reviews presenting an  
9  
10 368 up-to-date summary of currently available research in the field of cognitive leisure activities and  
11  
12 369 dementia. It has several limitations, however. First of all, there is a lack of evidence in our systematic  
13  
14 370 review, directly addressing our research question. Inferences from indirect evidence such as studies  
15  
16 371 on leisure activities have to be viewed cautiously. Second, in the overview of systematic reviews we  
17  
18 372 had to rely on the quality of included systematic reviews. Several methodological shortcomings were  
19  
20 373 detected (e.g. no risk of bias assessment, no dual screening etc.) thus our confidence in the  
21  
22 374 robustness of some findings is low. Third, most of the included studies were observational studies,  
23  
24 375 which are prone to selection bias because participants self-select the group. Risk factors for MCI or  
25  
26 376 dementia in participants selecting leisure activities or further education might be systematically  
27  
28 377 different from participants in the control group. For example, people who eventually suffer from  
29  
30 378 preclinical dementia stages might be more likely to avoid cognitive leisure activities, which would  
31  
32 379 lead to reverse causation. Fourth, many primary studies within the reviews used self-reported  
33  
34 380 questionnaires that could be challenging for people who start having cognitive deficits. Finally, the  
35  
36 381 variation of leisure activity categorization across studies made meta-analysis difficult and sometimes  
37  
38 382 impossible. For example, "visiting a library" was classified as a cognitive activity by one author but as  
39  
40 383 a physical activity by another. Some studies assessed current participation in activities, others  
41  
42 384 participation at younger ages. Additionally, some studies assessed the frequency of participation,  
43  
44 385 others the time devoted to activities and some the total number of leisure activities. Consequently,  
45  
46 386 due to these limitations, the comparability of results among studies was limited. A standardization of  
47  
48 387 measures and methods would be necessary to help synthesize evidence in the future and make more  
49  
50 388 reliable recommendations.  
51  
52  
53  
54  
55  
56

57  
58 389 **Implication for future research, policy and practice**  
59  
60

1  
2 390 Based on preliminary results of a long-term cohort study and indirect evidence from studies  
3  
4 391 on leisure activities, continuing education might be a promising option to help prevent dementia. A  
5  
6 392 recent study suggests that modifiable risk factors (low education, midlife hypertension, midlife  
7  
8 393 obesity, diabetes, physical inactivity, smoking, and depression) might be responsible for about a third  
9  
10 394 of Alzheimer's-type dementia cases.<sup>54</sup> Hence, considering our results, a campaign promoting to  
11  
12 395 "actively use the brain by participating in the wide range of continuing education" could be added to  
13  
14 396 the list of preventive options and could have an impact on the reduction of Alzheimer's-type  
15  
16 397 dementia cases. The Finnish Geriatric Intervention Study to Prevent Cognitive Impairment and  
17  
18 398 Disability (FINGER)<sup>55</sup>, randomized controlled trial, with a multi-domain approach (diet, exercise,  
19  
20 399 cognitive training, vascular risk monitoring) supports the hypothesis that simultaneous changes in  
21  
22 400 several risk factors can lead to a protective effect on cognition. In light of previously published  
23  
24 401 studies, we agree that in order to prevent Alzheimer's-type dementia in the future, a multi-domain  
25  
26 402 prevention approach seems to be the most promising solution.

27  
28  
29 403 Further research is needed to address the evidence gap regarding continuing education and  
30  
31 404 the extent to which it acts as a protective factor. A study similar to the Tasmanian Healthy Brain  
32  
33 405 Project<sup>40</sup>, but conducted as a randomized controlled trial, would be ideal because it would  
34  
35 406 adequately handle known and unknown confounders. Computers and Internet could play a more  
36  
37 407 significant role in future prevention trials. Instead of "sending your grandparents to university," older  
38  
39 408 adults could, for instance, be randomized to attend online courses and communicate with professors  
40  
41 409 and other students in virtual classrooms. This approach could save time, money, and increase the  
42  
43 410 potential participant pool.

## 411 **Conclusion**

412 Although no firm conclusions about the effects of continuing education to prevent MCI and  
413  
414 dementia can be drawn, data from preliminary and indirect evidence indicate that continuing  
415  
416 education could potentially have important preventive effects. Physicians and policymakers should  
417  
418 promote a healthy lifestyle, which also includes being cognitively active throughout late life.

1  
2 417 **Acknowledgments:** We would like to thank Manuela Müllner from Danube University Krems for  
3  
4 418 administrative support.

5  
6 419 **Funding Statement:** This research received no grant from any funding agency in the public,  
7  
8 420 commercial or not-for profit sectors. This work was supported by internal funds of the Danube-  
9  
10 421 University Krems, Austria.

11  
12  
13 422 **Availability of data and materials:** All extracted data are included in the manuscript. There are no  
14  
15 423 additional datasets available.

16  
17 424 **Competing interests:** All authors declare that they have no competing interest.

18  
19  
20 425 **Author Contributions:** All authors made substantial contribution to the conception and design of this  
21  
22 426 study. GG, NM, MK, CG and SA developed the concept of the study. As an information specialist, IK  
23  
24 427 developed the search strategy. GW, FKA, NM and BT conducted the literature review, abstracted  
25  
26 428 data and graded the strength of evidence. NM wrote the first draft of the manuscript; all authors  
27  
28 429 reviewed the manuscript and provided comments. All authors have given approval for this version to  
29  
30 430 be published.

31  
32  
33 431

34  
35 432 **Figure Legends:**

36  
37  
38 433 **Figure 1:** Analytic framework for continuing education to prevent mild cognitive impairment and  
39  
40 434 Alzheimer's-type dementia

41  
42 435 **Figure 2:** Flow diagram of systematic review of continuing education for the prevention of mild  
43  
44 436 cognitive impairment and Alzheimer's-type dementia

45  
46  
47 437 **Figure 3:** Flow diagram of overview of systematic reviews of cognitive leisure activities for the  
48  
49 438 prevention of mild cognitive impairment and Alzheimer's-type dementia

1  
2 439 **List of abbreviations**  
3  
4

- 5 440 AD = Alzheimer Disease  
6 441 aMCI = Amnesic Mild Cognitive Impairment  
7 442 AMSTAR = Assessing the Methodological Quality of Systematic Reviews  
8 443 CEDEFOP = European Centre for the Development of Vocational Training  
9 444 CENTRAL = Cochrane Central Register of Controlled Trials  
10 445 DSM = Diagnostic and Statistical Manual of Mental Disorders  
11 446 GRADE = Grading of Recommendations Assessment, Development and Evaluation  
12 447 HR = Harzard Ratio  
13 448 ICD = International Classification of Diseases  
14 449 MCI = Mild Cognitive Impairment  
15 450 MMSE = Mini-Mental State Examination  
16 451 OECD = Organisation for Economic Co-operation and Development  
17 452 OR = Odds Ratio  
18 453 PRISMA= Preferred Reporting Items for Systematic Reviews and Meta-Analyses  
19 454 ROBINS-I = Risk of Bias in non-randomized studies – of interventions  
20 455 RR = Relative Risk  
21 456 SD = Standard Deviation  
22 457 SMD = Standardized mean difference  
23 458 UNESCO = United Nations Educational, Scientific and Cultural Organization  
24 459 WHO = World Health Organisation  
25  
26  
27  
28  
29  
30  
31  
32  
33  
34  
35  
36  
37  
38  
39  
40  
41  
42  
43  
44  
45  
46  
47  
48  
49  
50  
51  
52  
53  
54  
55  
56  
57  
58  
59  
60



1  
2 464 **References**

- 3  
4 465 1. World Health Organisation (WHO). Dementia: A Public Health Priority Geneva, Switzerland 2012  
5 466 [Available from:  
6 467 [http://apps.who.int/iris/bitstream/10665/75263/1/9789241564458\\_eng.pdf?ua=1](http://apps.who.int/iris/bitstream/10665/75263/1/9789241564458_eng.pdf?ua=1) accessed  
7 468 20 Apr 2017.
- 8 469 2. World Health Organisation (WHO). The epidemiology and impact of dementia. Current state and  
9 470 future trends 2015 [Available from:  
10 471 [http://www.who.int/mental\\_health/neurology/dementia/dementia\\_thematicbrief\\_epidemiology.pdf](http://www.who.int/mental_health/neurology/dementia/dementia_thematicbrief_epidemiology.pdf) accessed 17 Apr 2017.  
11 472
- 12 473 3. Alzheimer's Association. Alzheimer's Disease Facts and Figures 2017 [accessed 12 Apr 2018].
- 13 474 4. Prince M, Wimo A, Guerchet M, et al. World Alzheimer Report 2015 - The Global Impact of  
14 475 dementia. An analysis of prevalence, incidence, costs and trends. London 2015 [Available  
15 476 from: <https://www.alz.co.uk/research/WorldAlzheimerReport2015.pdf> accessed 10 Mar  
16 477 2017.
- 17 478 5. Association AP. Diagnostic and Statistical Manual of Mental Disorders, Fifth Edition (DSM-5):  
18 479 Arlington, VA: American Psychiatric Publishing 2013.
- 19 480 6. Committee on Decreasing the Risk of Alzheimer's-Type Dementia. Mild Cognitive Impairment Age-  
20 481 Related Cognitive IBoHS, Policy Institute of, Medicine National Academies of Sciences,  
21 482 Engineering Medicine. The National Academies Collection: Reports funded by National  
22 483 Institutes of Health. *Considerations for the Design of a Systemic Review of Interventions for*  
23 484 *Preventing Clinical Alzheimer's-Type Dementia, Mild Cognitive Impairment, and Age-Related*  
24 485 *Cognitive Decline: Letter Report* 2015. [https://www.nap.edu/catalog/21885/considerations-](https://www.nap.edu/catalog/21885/considerations-for-the-design-of-a-systematic-review-of-interventions-for-preventing-clinical-alzheimers-type-dementia-mild-cognitive-impairment-and-age-related-cognitive-decline)  
25 486 [for-the-design-of-a-systematic-review-of-interventions-for-preventing-clinical-alzheimers-](https://www.nap.edu/catalog/21885/considerations-for-the-design-of-a-systematic-review-of-interventions-for-preventing-clinical-alzheimers-type-dementia-mild-cognitive-impairment-and-age-related-cognitive-decline)  
26 487 [type-dementia-mild-cognitive-impairment-and-age-related-cognitive-decline.](https://www.nap.edu/catalog/21885/considerations-for-the-design-of-a-systematic-review-of-interventions-for-preventing-clinical-alzheimers-type-dementia-mild-cognitive-impairment-and-age-related-cognitive-decline)
- 27 488 7. Reynish E, Fratiglioni L, Prince M, et al. EUROCODE Prevalence of dementia in Europe 2006  
28 489 [Available from:  
29 490 [https://ec.europa.eu/health/archive/ph\\_information/dissemination/diseases/docs/eurocode](https://ec.europa.eu/health/archive/ph_information/dissemination/diseases/docs/eurocode.pdf)  
30 491 [.pdf](https://ec.europa.eu/health/archive/ph_information/dissemination/diseases/docs/eurocode.pdf) accessed 6 Mar 2017.
- 31 492 8. Alonso A, Jacobs DR, Jr., Menotti A, et al. Cardiovascular risk factors and dementia mortality: 40  
32 493 years of follow-up in the Seven Countries Study. *Journal of the neurological sciences*  
33 494 2009;280(1-2):79-83. doi: 10.1016/j.jns.2009.02.004 [published Online First: 2009/03/03]
- 34 495 9. Scarmeas N, Luchsinger JA, Schupf N, et al. Physical activity, diet, and risk of Alzheimer disease.  
35 496 *Jama* 2009;302(6):627-37. doi: 10.1001/jama.2009.1144 [published Online First: 2009/08/13]
- 36 497 10. Institute of Medicine (IOM). Cognitive aging: progress in understanding and opportunities for  
37 498 action. Washington, DC: The National Academies Press 2015:109-47.
- 38 499 11. Wilson RS, Boyle PA, Yu L, et al. Life-span cognitive activity, neuropathologic burden, and  
39 500 cognitive aging. *Neurology* 2013;81(4):314-21. doi: 10.1212/WNL.0b013e31829c5e8a  
40 501 [published Online First: 2013/07/05]
- 41 502 12. Bosma H, van Boxtel MP, Ponds RW, et al. Engaged lifestyle and cognitive function in middle and  
42 503 old-aged, non-demented persons: a reciprocal association? *Zeitschrift fur Gerontologie und*  
43 504 *Geriatric* 2002;35(6):575-81. doi: 10.1007/s00391-002-0080-y [published Online First:  
44 505 2002/12/20]
- 45 506 13. Hultsch DF, Hertzog C, Small BJ, et al. Use it or lose it: engaged lifestyle as a buffer of cognitive  
46 507 decline in aging? *Psychology and aging* 1999;14(2):245-63. [published Online First:  
47 508 1999/07/14]
- 48 509 14. Wilson RS, Mendes De Leon CF, Barnes LL, et al. Participation in cognitively stimulating activities  
49 510 and risk of incident Alzheimer disease. *Jama* 2002;287(6):742-8. [published Online First:  
50 511 2002/02/20]
- 51 512 15. Wilson RS, Scherr PA, Schneider JA, et al. Relation of cognitive activity to risk of developing  
52 513 Alzheimer disease. *Neurology* 2007;69(20):1911-20. doi:  
53 514 10.1212/01.wnl.0000271087.67782.cb [published Online First: 2007/06/29]

- 1  
2 515 16. Tucker AM, Stern Y. Cognitive reserve in aging. *Current Alzheimer research* 2011;8(4):354-60.  
3 516 [published Online First: 2011/01/13]
- 4 517 17. Stern Y. Cognitive reserve in ageing and Alzheimer's disease. *The Lancet Neurology*  
5 518 2012;11(11):1006-12. doi: 10.1016/s1474-4422(12)70191-6 [published Online First:  
6 519 2012/10/20]
- 7 520 18. Valenzuela MJ, Sachdev P. Brain reserve and dementia: a systematic review. *Psychological*  
8 521 *medicine* 2006;36(4):441-54. doi: 10.1017/s0033291705006264 [published Online First:  
9 522 2005/10/07]
- 10 523 19. Scarmeas N, Stern Y. Cognitive reserve: implications for diagnosis and prevention of Alzheimer's  
11 524 disease. *Current neurology and neuroscience reports* 2004;4(5):374-80. [published Online  
12 525 First: 2004/08/25]
- 13 526 20. Diamond MC, Rosenzweig MR, Bennett EL, et al. Effects of environmental enrichment and  
14 527 impoverishment on rat cerebral cortex. *Journal of neurobiology* 1972;3(1):47-64. doi:  
15 528 10.1002/neu.480030105 [published Online First: 1972/01/01]
- 16 529 21. Ngandu T, von Strauss E, Helkala EL, et al. Education and dementia: what lies behind the  
17 530 association? *Neurology* 2007;69(14):1442-50. doi: 10.1212/01.wnl.0000277456.29440.16  
18 531 [published Online First: 2007/10/03]
- 19 532 22. Marx J. Neuroscience. Preventing Alzheimer's: a lifelong commitment? *Science (New York, NY)*  
20 533 2005;309(5736):864-6. doi: 10.1126/science.309.5736.864 [published Online First:  
21 534 2005/08/06]
- 22 535 23. Fratiglioni L, Paillard-Borg S, Winblad B. An active and socially integrated lifestyle in late life might  
23 536 protect against dementia. *The Lancet Neurology* 2004;3(6):343-53. doi: 10.1016/s1474-  
24 537 4422(04)00767-7 [published Online First: 2004/05/26]
- 25 538 24. Katzman R, Terry R, DeTeresa R, et al. Clinical, pathological, and neurochemical changes in  
26 539 dementia: a subgroup with preserved mental status and numerous neocortical plaques.  
27 540 *Annals of neurology* 1988;23(2):138-44. doi: 10.1002/ana.410230206 [published Online First:  
28 541 1988/02/01]
- 29 542 25. UNESCO. International Standard Classification of Education (ISCED) 2011 2012 [Available from:  
30 543 <http://uis.unesco.org/en/glossary-term/adult-education> accessed 11 May 2017.
- 31 544 26. UNESCO. Continuing Education and New Directions Bangkok1993 [Available from:  
32 545 [http://www.unesco.org/education/pdf/413\\_48a.pdf](http://www.unesco.org/education/pdf/413_48a.pdf) accessed 11 May 2017.
- 33 546 27. Manninen J, Sgier I, Fleige M, et al. Benefits of Lifelong Learning in Europe: Main Results of the  
34 547 BeLL Project Research Report. 2014 [Available from: [http://www.bell-project.eu/cms/wp-](http://www.bell-project.eu/cms/wp-content/uploads/2014/06/BeLL-Research-Report.pdf)  
35 548 [content/uploads/2014/06/BeLL-Research-Report.pdf](http://www.bell-project.eu/cms/wp-content/uploads/2014/06/BeLL-Research-Report.pdf) accessed 11 May 2017.
- 36 549 28. OECD. Learning opportunities for adults. Participation in adult education. Paris,1977:11.
- 37 550 29. Cedefop. Terminology of European education and training policy A selection of 100 key  
38 551 terms2008.
- 39 552 30. Kil M, Motschilnig R, Thöne-Geyer B. What Can Adult Education Accomplish? The Benefits of  
40 553 Adult Learning – The Approach, Measurement and Prospects 2013 [Available from:  
41 554 <https://www.die-bonn.de/doks/2013-benefits-en-01.pdf> accessed 16 May 2017.
- 42 555 31. Moher D, Liberati A, Tetzlaff J, et al. Reprint--preferred reporting items for systematic reviews  
43 556 and meta-analyses: the PRISMA statement. *Physical therapy* 2009;89(9):873-80. [published  
44 557 Online First: 2009/09/03]
- 45 558 32. Matyas N, Auer S, Gisinger C, et al. Continuing education for the prevention of mild cognitive  
46 559 impairment and Alzheimer's-type dementia: a systematic review protocol. *Systematic*  
47 560 *reviews* 2017;6(1):157. doi: 10.1186/s13643-017-0553-0 [published Online First: 2017/08/10]
- 48 561 33. Petersen R. C. Mild cognitive impairment as a diagnostic entity. *Journal of internal medicine*  
49 562 2004;256(3):183-94. doi: 10.1111/j.1365-2796.2004.01388.x [published Online First:  
50 563 2004/08/25]
- 51 564 34. McGowan J, Sampson M, Salzwedel DM, et al. PRESS Peer Review of Electronic Search Strategies:  
52 565 2015 Guideline Statement. *Journal of Clinical Epidemiology*;75:40-46. doi:  
53 566 10.1016/j.jclinepi.2016.01.021

- 1  
2 567 35. Veritas Health Innovation M, Australia. Covidence systematic review software [Available from:  
3 568 [www.covidence.org](http://www.covidence.org).  
4 569 36. Sterne JA, Hernan MA, Reeves BC, et al. ROBINS-I: a tool for assessing risk of bias in non-  
5 570 randomised studies of interventions. *BMJ (Clinical research ed)* 2016;355:i4919. doi:  
6 571 10.1136/bmj.i4919 [published Online First: 2016/10/14]  
7 572 37. Shea BJ, Hamel C, Wells GA, et al. AMSTAR is a reliable and valid measurement tool to assess the  
8 573 methodological quality of systematic reviews. *J Clin Epidemiol* 2009;62(10):1013-20. doi:  
9 574 10.1016/j.jclinepi.2008.10.009 [published Online First: 2009/02/24]  
10 575 38. Balshem H, Helfand M, Schunemann HJ, et al. GRADE guidelines: 3. Rating the quality of evidence.  
11 576 *J Clin Epidemiol* 2011;64(4):401-6. doi: 10.1016/j.jclinepi.2010.07.015 [published Online First:  
12 577 2011/01/07]  
13 578 39. Thow ME, Summers MJ, Saunders NL, et al. Further education improves cognitive reserve and  
14 579 triggers improvement in selective cognitive functions in older adults: The Tasmanian Healthy  
15 580 Brain Project. *Alzheimer's & dementia (Amsterdam, Netherlands)* 2018;10:22-30. doi:  
16 581 10.1016/j.dadm.2017.08.004 [published Online First: 2017/10/17]  
17 582 40. Lenehan ME, Summers MJ, Saunders NL, et al. Sending your grandparents to university increases  
18 583 cognitive reserve: The Tasmanian Healthy Brain Project. *Neuropsychology* 2016;30(5):525-31.  
19 584 doi: 10.1037/neu0000249 [published Online First: 2015/11/17]  
20 585 41. Di Marco LY, Marzo A, Munoz-Ruiz M, et al. Modifiable lifestyle factors in dementia: a systematic  
21 586 review of longitudinal observational cohort studies. *Journal of Alzheimer's disease : JAD*  
22 587 2014;42(1):119-35. doi: 10.3233/jad-132225 [published Online First: 2014/05/07]  
23 588 42. Opdebeeck C, Martyr A, Clare L. Cognitive reserve and cognitive function in healthy older people:  
24 589 a meta-analysis. *Neuropsychology, development, and cognition Section B, Aging,*  
25 590 *neuropsychology and cognition* 2016;23(1):40-60. doi: 10.1080/13825585.2015.1041450  
26 591 [published Online First: 2015/05/02]  
27 592 43. Sajeev G, Weuve J, Jackson JW, et al. Late-life Cognitive Activity and Dementia: A Systematic  
28 593 Review and Bias Analysis. *Epidemiology (Cambridge, Mass)* 2016;27(5):732-42. doi:  
29 594 10.1097/ede.0000000000000513 [published Online First: 2016/05/27]  
30 595 44. Toril P, Reales JM, Ballesteros S. Video game training enhances cognition of older adults: a meta-  
31 596 analytic study. *Psychology and aging* 2014;29(3):706-16. doi: 10.1037/a0037507 [published  
32 597 Online First: 2014/09/23]  
33 598 45. Yates LA, Ziser S, Spector A, et al. Cognitive leisure activities and future risk of cognitive  
34 599 impairment and dementia: systematic review and meta-analysis. *International*  
35 600 *psychogeriatrics* 2016;28(11):1791-806. doi: 10.1017/s1041610216001137 [published Online  
36 601 First: 2016/08/10]  
37 602 46. Summers MJ, Saunders NL, Valenzuela MJ, et al. The Tasmanian Healthy Brain Project (THBP): a  
38 603 prospective longitudinal examination of the effect of university-level education in older  
39 604 adults in preventing age-related cognitive decline and reducing the risk of dementia.  
40 605 *International psychogeriatrics* 2013;25(7):1145-55. doi: 10.1017/s1041610213000380  
41 606 [published Online First: 2013/03/26]  
42 607 47. Ward DD, Summers MJ, Saunders NL, et al. Modeling cognitive reserve in healthy middle-aged  
43 608 and older adults: the Tasmanian Healthy Brain Project. *International psychogeriatrics*  
44 609 2015;27(4):579-89. doi: 10.1017/s1041610214002075 [published Online First: 2014/09/24]  
45 610 48. Akbaraly TN, Portet F, Fustini S, et al. Leisure activities and the risk of dementia in the elderly:  
46 611 results from the Three-City Study. *Neurology* 2009;73(11):854-61. doi:  
47 612 10.1212/WNL.0b013e3181b7849b [published Online First: 2009/09/16]  
48 613 49. Verghese J, Lipton RB, Katz MJ, et al. Leisure activities and the risk of dementia in the elderly. *The*  
49 614 *New England journal of medicine* 2003;348(25):2508-16. doi: 10.1056/NEJMoa022252  
50 615 [published Online First: 2003/06/20]  
51 616 50. Stern Y, Gurland B, Tatemichi TK, et al. Influence of education and occupation on the incidence of  
52 617 Alzheimer's disease. *Jama* 1994;271(13):1004-10. [published Online First: 1994/04/06]  
53  
54  
55  
56  
57  
58  
59  
60

- 1  
2 618 51. Pascual-Leone A, Amedi A, Fregni F, et al. The plastic human brain cortex. *Annual review of*  
3 619 *neuroscience* 2005;28:377-401. doi: 10.1146/annurev.neuro.27.070203.144216 [published  
4 620 Online First: 2005/07/19]
- 5 621 52. Knaepen K, Goekint M, Heyman EM, et al. Neuroplasticity - exercise-induced response of  
6 622 peripheral brain-derived neurotrophic factor: a systematic review of experimental studies in  
7 623 human subjects. *Sports medicine (Auckland, NZ)* 2010;40(9):765-801. doi:  
8 624 10.2165/11534530-000000000-00000 [published Online First: 2010/08/24]
- 9 625 53. Vance DE, Roberson AJ, McGuinness TM, et al. How neuroplasticity and cognitive reserve protect  
10 626 cognitive functioning. *Journal of psychosocial nursing and mental health services*  
11 627 2010;48(4):23-30. doi: 10.3928/02793695-20100302-01 [published Online First: 2010/03/31]
- 12 628 54. Norton S, Matthews FE, Barnes DE, et al. Potential for primary prevention of Alzheimer's disease:  
13 629 an analysis of population-based data. *The Lancet Neurology* 2014;13(8):788-94. doi:  
14 630 10.1016/s1474-4422(14)70136-x [published Online First: 2014/07/18]
- 15 631 55. Ngandu T, Lehtisalo J, Solomon A, et al. A 2 year multidomain intervention of diet, exercise,  
16 632 cognitive training, and vascular risk monitoring versus control to prevent cognitive decline in  
17 633 at-risk elderly people (FINGER): a randomised controlled trial. *Lancet (London, England)*  
18 634 2015;385(9984):2255-63. doi: 10.1016/s0140-6736(15)60461-5 [published Online First:  
19 635 2015/03/17]

20  
21  
22  
23 636  
24  
25  
26  
27  
28  
29  
30  
31  
32  
33  
34  
35  
36  
37  
38  
39  
40  
41  
42  
43  
44  
45  
46  
47  
48  
49  
50  
51  
52  
53  
54  
55  
56  
57  
58  
59  
60

1  
2  
3  
4  
5  
6  
7  
8  
9  
10  
11  
12  
13  
14  
15  
16  
17  
18  
19  
20  
21  
22  
23  
24  
25  
26  
27  
28  
29  
30  
31  
32  
33  
34  
35  
36  
37  
38  
39  
40  
41  
42  
43  
44  
45  
46  
47  
48  
49  
50  
51  
52  
53  
54  
55  
56  
57  
58  
59  
60

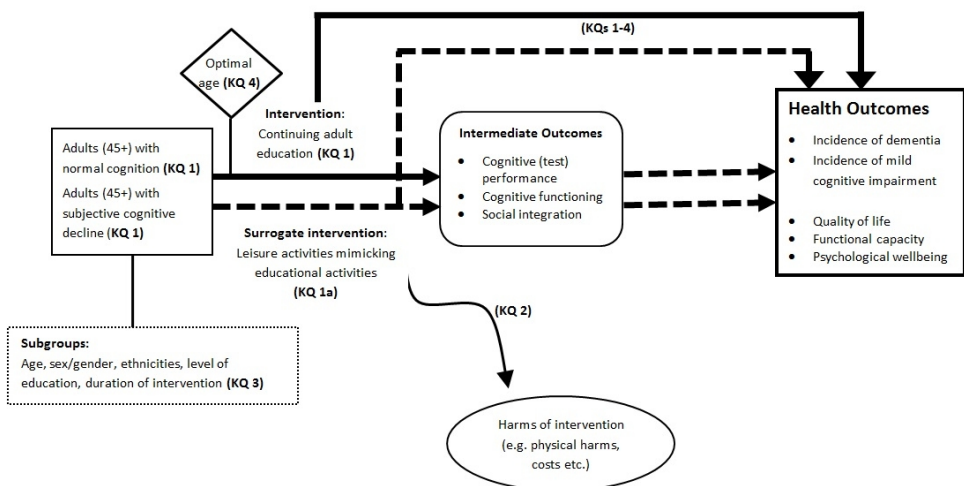

Analytic framework for continuing education to prevent mild cognitive impairment and Alzheimer's-type dementia

240x139mm (120 x 120 DPI)

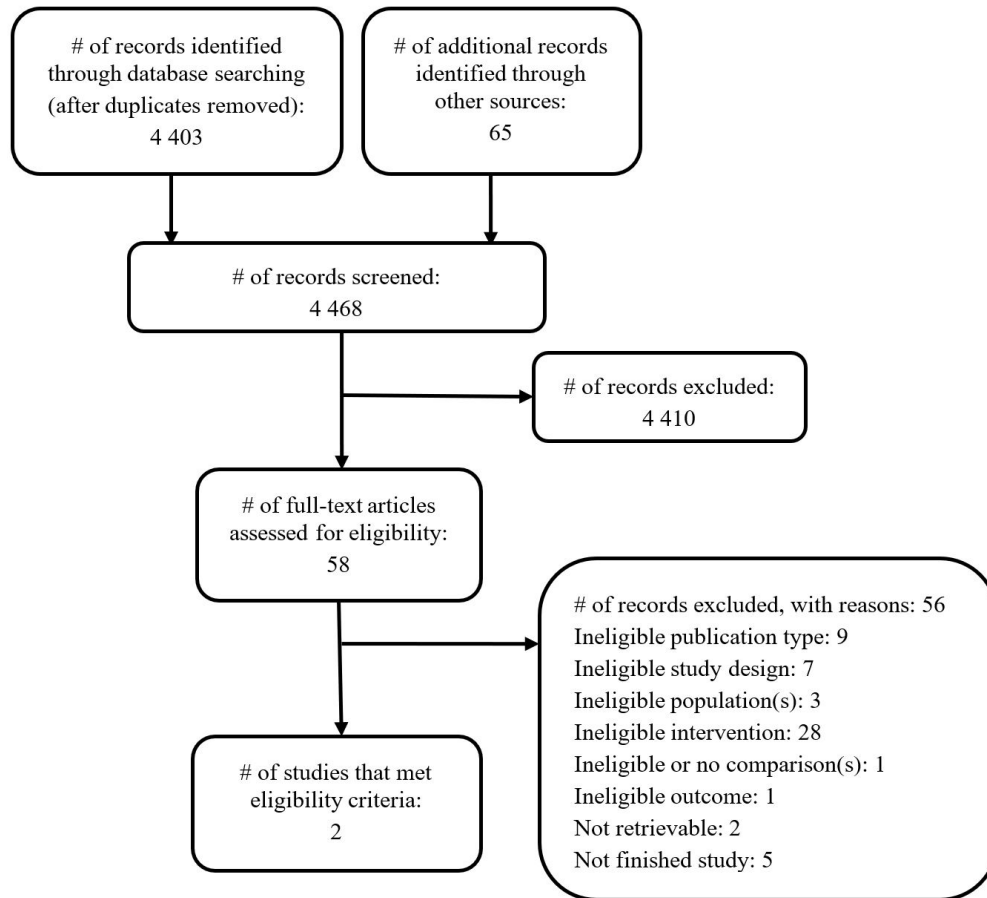

Flow diagram of systematic review of continuing education for the prevention of mild cognitive impairment and Alzheimer's-type dementia

178x162mm (192 x 192 DPI)

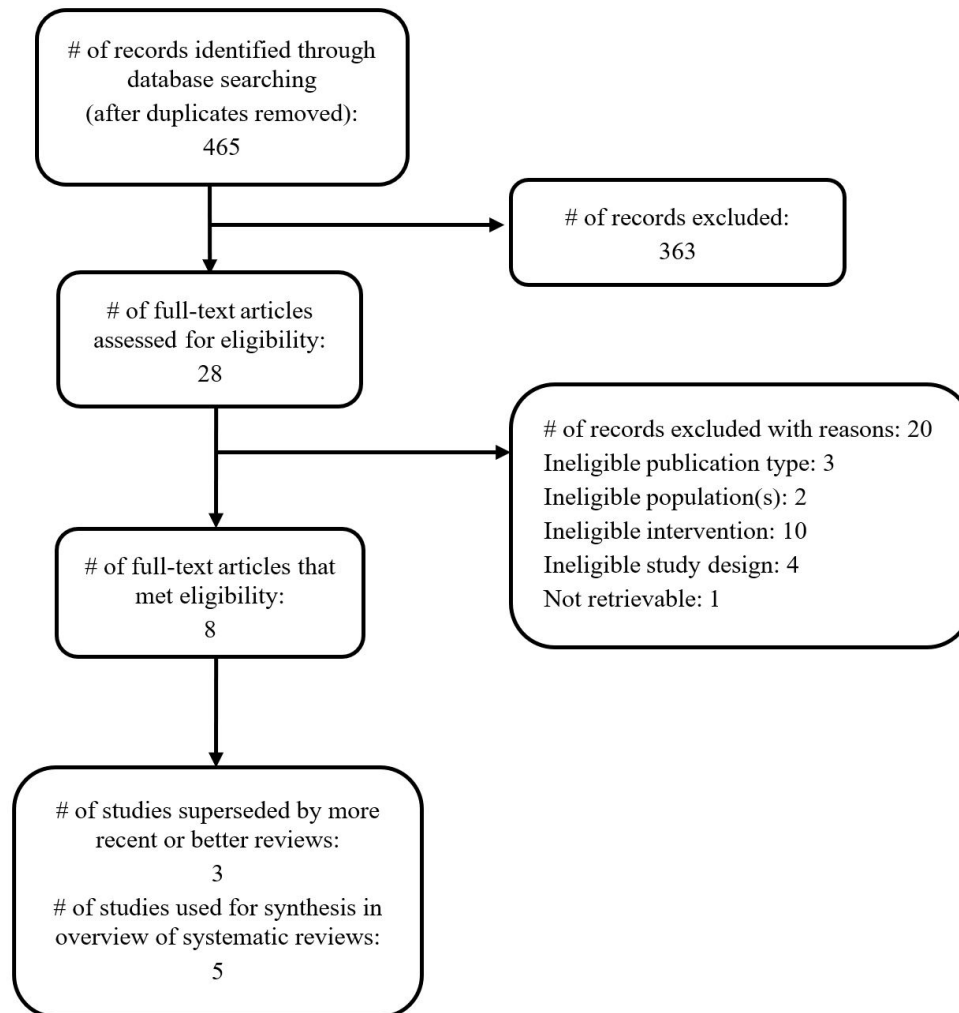

Flow diagram of overview of systematic reviews of cognitive leisure activities for the prevention of mild cognitive impairment and Alzheimer's-type dementia

167x170mm (192 x 192 DPI)

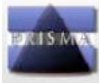

# PRISMA 2009 Checklist

| Section/topic             | #  | Checklist item                                                                                                                                                                                                                                                                                              | Reported on page #         |
|---------------------------|----|-------------------------------------------------------------------------------------------------------------------------------------------------------------------------------------------------------------------------------------------------------------------------------------------------------------|----------------------------|
| <b>TITLE</b>              |    |                                                                                                                                                                                                                                                                                                             |                            |
| Title                     | 1  | Identify the report as a systematic review, meta-analysis, or both.                                                                                                                                                                                                                                         | Page 1 (line 1-3)          |
| <b>ABSTRACT</b>           |    |                                                                                                                                                                                                                                                                                                             |                            |
| Structured summary        | 2  | Provide a structured summary including, as applicable: background; objectives; data sources; study eligibility criteria, participants, and interventions; study appraisal and synthesis methods; results; limitations; conclusions and implications of key findings; systematic review registration number. | Page 3-4 (line 33-72)      |
| <b>INTRODUCTION</b>       |    |                                                                                                                                                                                                                                                                                                             |                            |
| Rationale                 | 3  | Describe the rationale for the review in the context of what is already known.                                                                                                                                                                                                                              | Page 5-7 (line 118-122)    |
| Objectives                | 4  | Provide an explicit statement of questions being addressed with reference to participants, interventions, comparisons, outcomes, and study design (PICOS).                                                                                                                                                  | Page 7 (line 124-135)      |
| <b>METHODS</b>            |    |                                                                                                                                                                                                                                                                                                             |                            |
| Protocol and registration | 5  | Indicate if a review protocol exists, if and where it can be accessed (e.g., Web address), and, if available, provide registration information including registration number.                                                                                                                               | Page 7 (line 142)          |
| Eligibility criteria      | 6  | Specify study characteristics (e.g., PICOS, length of follow-up) and report characteristics (e.g., years considered, language, publication status) used as criteria for eligibility, giving rationale.                                                                                                      | Page 8-9 (line 159 - 184)  |
| Information sources       | 7  | Describe all information sources (e.g., databases with dates of coverage, contact with study authors to identify additional studies) in the search and date last searched.                                                                                                                                  | Page 9 (line 186-202)      |
| Search                    | 8  | Present full electronic search strategy for at least one database, including any limits used, such that it could be repeated.                                                                                                                                                                               | Supplementary File 3 and 4 |
| Study selection           | 9  | State the process for selecting studies (i.e., screening, eligibility, included in systematic review, and, if applicable, included in the meta-analysis).                                                                                                                                                   | Page 10 (line 203 - 206)   |
| Data collection process   | 10 | Describe method of data extraction from reports (e.g., piloted forms, independently, in duplicate) and any processes for obtaining and confirming data from investigators.                                                                                                                                  | Page 10 (line 207-210)     |
| Data items                | 11 | List and define all variables for which data were sought (e.g., PICOS, funding sources) and any assumptions and simplifications made.                                                                                                                                                                       | Page 10 (line 210 -        |



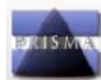

# PRISMA 2009 Checklist

|                                    |    |                                                                                                                                                                                                                        |                           |
|------------------------------------|----|------------------------------------------------------------------------------------------------------------------------------------------------------------------------------------------------------------------------|---------------------------|
|                                    |    |                                                                                                                                                                                                                        | 214)                      |
| Risk of bias in individual studies | 12 | Describe methods used for assessing risk of bias of individual studies (including specification of whether this was done at the study or outcome level), and how this information is to be used in any data synthesis. | Page 10 (line 215-221)    |
| Summary measures                   | 13 | State the principal summary measures (e.g., risk ratio, difference in means).                                                                                                                                          | Page 10-11 (line 222-230) |
| Synthesis of results               | 14 | Describe the methods of handling data and combining results of studies, if done, including measures of consistency (e.g., $I^2$ ) for each meta-analysis.                                                              | Page 10-11 (line 222-230) |

Page 1 of 2

| Section/topic                 | #  | Checklist item                                                                                                                                                                                           | Reported on page #                                               |
|-------------------------------|----|----------------------------------------------------------------------------------------------------------------------------------------------------------------------------------------------------------|------------------------------------------------------------------|
| Risk of bias across studies   | 15 | Specify any assessment of risk of bias that may affect the cumulative evidence (e.g., publication bias, selective reporting within studies).                                                             | NA                                                               |
| Additional analyses           | 16 | Describe methods of additional analyses (e.g., sensitivity or subgroup analyses, meta-regression), if done, indicating which were pre-specified.                                                         | NA                                                               |
| <b>RESULTS</b>                |    |                                                                                                                                                                                                          |                                                                  |
| Study selection               | 17 | Give numbers of studies screened, assessed for eligibility, and included in the review, with reasons for exclusions at each stage, ideally with a flow diagram.                                          | Page 11 (238-243)<br>Figure 2 and 3                              |
| Study characteristics         | 18 | For each study, present characteristics for which data were extracted (e.g., study size, PICOS, follow-up period) and provide the citations.                                                             | Page 11-12 (246-268)<br>table 1                                  |
| Risk of bias within studies   | 19 | Present data on risk of bias of each study and, if available, any outcome level assessment (see item 12).                                                                                                | Page 13-14, table 1                                              |
| Results of individual studies | 20 | For all outcomes considered (benefits or harms), present, for each study: (a) simple summary data for each intervention group (b) effect estimates and confidence intervals, ideally with a forest plot. | Page 13-17, table 1                                              |
| Synthesis of results          | 21 | Present results of each meta-analysis done, including confidence intervals and measures of consistency.                                                                                                  | NA                                                               |
| Risk of bias across studies   | 22 | Present results of any assessment of risk of bias across studies (see Item 15).                                                                                                                          | Page 12 (line 263 – 268, line 254 – 256)<br>Supplementary file 5 |

For peer review only - <http://bmjopen.bmj.com/site/about/guidelines.xhtml>

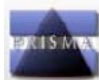

# PRISMA 2009 Checklist

|                     |    |                                                                                                                                                                                      |                           |
|---------------------|----|--------------------------------------------------------------------------------------------------------------------------------------------------------------------------------------|---------------------------|
| Additional analysis | 23 | Give results of additional analyses, if done (e.g., sensitivity or subgroup analyses, meta-regression [see Item 16]).                                                                | NA                        |
| <b>DISCUSSION</b>   |    |                                                                                                                                                                                      |                           |
| Summary of evidence | 24 | Summarize the main findings including the strength of evidence for each main outcome; consider their relevance to key groups (e.g., healthcare providers, users, and policy makers). | Page 18                   |
| Limitations         | 25 | Discuss limitations at study and outcome level (e.g., risk of bias), and at review-level (e.g., incomplete retrieval of identified research, reporting bias).                        | Page 19                   |
| Conclusions         | 26 | Provide a general interpretation of the results in the context of other evidence, and implications for future research.                                                              | Page 20                   |
| <b>FUNDING</b>      |    |                                                                                                                                                                                      |                           |
| Funding             | 27 | Describe sources of funding for the systematic review and other support (e.g., supply of data); role of funders for the systematic review.                                           | Page 21<br>(line 419-421) |

From: Moher D, Liberati A, Tetzlaff J, Altman DG, The PRISMA Group (2009). Preferred Reporting Items for Systematic Reviews and Meta-Analyses: The PRISMA Statement. PLoS Med 6(6): e100097  
doi:10.1371/journal.pmed100097

For more information, visit: [www.prisma-statement.org](http://www.prisma-statement.org).

Page 2 of 2

## Supplementary File 2: Inclusion and exclusion criteria

| Criteria              |                                                                                                                                                                                                                                                                                                                                                                                                                          |                                                                                                                                                                                                                                                                                                                                                                                                                                        |
|-----------------------|--------------------------------------------------------------------------------------------------------------------------------------------------------------------------------------------------------------------------------------------------------------------------------------------------------------------------------------------------------------------------------------------------------------------------|----------------------------------------------------------------------------------------------------------------------------------------------------------------------------------------------------------------------------------------------------------------------------------------------------------------------------------------------------------------------------------------------------------------------------------------|
| Category              | Inclusion                                                                                                                                                                                                                                                                                                                                                                                                                | Exclusion                                                                                                                                                                                                                                                                                                                                                                                                                              |
| Population            | - Adults (45 years or older) without a clinical diagnosis of cognitive impairment; this includes people with subjective cognitive impairment                                                                                                                                                                                                                                                                             | - People younger than 45 years<br>- People with a clinical diagnosis of impaired cognition (e.g., MMSE < 24)<br>- Populations comprised exclusively of patients with primary diseases with an increased risk for dementia such as Parkinson disease, HIV infection, multiple sclerosis, stroke, post traumatic brain injuries, infectious diseases, psychiatric conditions (e.g. alcohol abuse, drug abuse, major depressive disorder) |
| Subgroups             | - Age<br>- Sex/gender<br>- Race/ethnicity<br>- Level of education<br>- Duration of intervention                                                                                                                                                                                                                                                                                                                          |                                                                                                                                                                                                                                                                                                                                                                                                                                        |
| Geography             | No limit                                                                                                                                                                                                                                                                                                                                                                                                                 | No limit                                                                                                                                                                                                                                                                                                                                                                                                                               |
| Date of search        | Searches will go back until 1990                                                                                                                                                                                                                                                                                                                                                                                         |                                                                                                                                                                                                                                                                                                                                                                                                                                        |
| Settings              | Community-dwelling adults                                                                                                                                                                                                                                                                                                                                                                                                | Institutionalized people, e.g., people in nursing homes                                                                                                                                                                                                                                                                                                                                                                                |
| Interventions         | <b>For systematic review</b><br>- all cognitive activities that are provided by formal and non-formal educational institutions<br>- classes/courses/trainings that are based on individual interests and that are attended voluntarily<br><br><b>For overview of systematic reviews</b><br>Leisure activities that are cognitively stimulating and mimic the content of continuing education but in an informal setting. | Formal (vocational) education and training; physical activities, topics and courses that are related to any special job position and/or occupation                                                                                                                                                                                                                                                                                     |
| Control Interventions | No continuing education                                                                                                                                                                                                                                                                                                                                                                                                  | Any educational activities, physical activities                                                                                                                                                                                                                                                                                                                                                                                        |
| Outcomes              | <b>Health Outcomes</b><br>- Incidence of dementia<br>- Incidence of MCI<br>- Psychological wellbeing<br>- Functional capacity<br>- Quality of life<br>- Other relevant health outcomes<br><br><b>Intermediate Outcomes</b><br>- Cognitive functioning<br>- Cognitive (test) performance<br>- Social inclusion                                                                                                            |                                                                                                                                                                                                                                                                                                                                                                                                                                        |
| Timing                | Minimum duration of the intervention: 3 months<br>Minimum follow up time: 1 year                                                                                                                                                                                                                                                                                                                                         |                                                                                                                                                                                                                                                                                                                                                                                                                                        |
| Publication language  | No language restrictions                                                                                                                                                                                                                                                                                                                                                                                                 |                                                                                                                                                                                                                                                                                                                                                                                                                                        |
| Study design          | <b>For systematic reviews</b><br>- RCTs<br>- Nonrandomized controlled trials<br>- Prospective controlled cohort studies<br>- Retrospective controlled cohort studies<br>- Case-control studies<br>- Nonrandomized studies must have a minimum sample size of 300 or more participants<br><br><b>For overview of systematic reviews</b><br>-systematic reviews and meta-analyses                                          | - Case series<br>- Case reports<br>- Cross over trials<br>- Nonsystematic reviews<br>- Studies without a control group<br>- Nonrandomized studies with fewer than 300 participants                                                                                                                                                                                                                                                     |

### Supplementary file 3: Search Strategies of Systematic Review, by database

#### Medline (via PubMed):10 July 2017

| Medline |                                                                                                                                                                                                                        |         |
|---------|------------------------------------------------------------------------------------------------------------------------------------------------------------------------------------------------------------------------|---------|
| Search  | Query                                                                                                                                                                                                                  | Hits    |
| 1       | Dementia/ or exp Alzheimer Disease/                                                                                                                                                                                    | 117464  |
| 2       | Cognitive Dysfunction/                                                                                                                                                                                                 | 5918    |
| 3       | Cognition/                                                                                                                                                                                                             | 81481   |
| 4       | (dementia or alzheimer*).ti,ab.                                                                                                                                                                                        | 174908  |
| 5       | ((cognit* or memory or mental) adj3 (impair* or decline* or deficit* or reduc* or function*)).ti,ab.                                                                                                                   | 166793  |
| 6       | or/1-5                                                                                                                                                                                                                 | 370522  |
| 7       | Primary Prevention/                                                                                                                                                                                                    | 16883   |
| 8       | prevent*.ti,ab.                                                                                                                                                                                                        | 1207345 |
| 9       | (protect* or reduc* or delay* or improv*).ti.                                                                                                                                                                          | 710454  |
| 10      | or/7-9                                                                                                                                                                                                                 | 1858549 |
| 11      | 6 and 10                                                                                                                                                                                                               | 39070   |
| 12      | Dementia/pc or exp Alzheimer Disease/pc or Cognitive Dysfunction/pc [Prevention & Control]                                                                                                                             | 4039    |
| 13      | 11 or 12                                                                                                                                                                                                               | 41057   |
| 14      | exp Education, Continuing/                                                                                                                                                                                             | 60977   |
| 15      | ((continuing or adult) adj2 (education or training)).af.                                                                                                                                                               | 80639   |
| 16      | (lifelong learning or life-long learning).af.                                                                                                                                                                          | 2396    |
| 17      | education/ or exp curriculum/ or exp education, distance/ or exp education, nonprofessional/ or exp educational measurement/ or exp international educational exchange/ or mentoring/ or exp schools/ or exp teaching/ | 500562  |
| 18      | Learning/                                                                                                                                                                                                              | 56308   |
| 19      | Students/                                                                                                                                                                                                              | 47445   |
| 20      | exp Educational Status/                                                                                                                                                                                                | 47641   |
| 21      | (learn* or class or classes or course? or educat* or school* or train* or seminar* or tutor*).ti.                                                                                                                      | 569072  |
| 22      | education.fs. not exp Health Personnel/ed                                                                                                                                                                              | 200448  |
| 23      | (cognitiv* adj2 (stimulat* or activit*)).ti.                                                                                                                                                                           | 742     |
| 24      | or/14-23                                                                                                                                                                                                               | 1075912 |
| 25      | 13 and 24                                                                                                                                                                                                              | 3357    |
| 26      | exp Dementia/dt [Drug Therapy]                                                                                                                                                                                         | 17955   |
| 27      | 25 not 26                                                                                                                                                                                                              | 3243    |
| 28      | exp animals/ not exp humans/                                                                                                                                                                                           | 4438320 |
| 29      | 27 not 28                                                                                                                                                                                                              | 2497    |
| 30      | exp age groups/ not (exp aged/ or middle aged/)                                                                                                                                                                        | 3709828 |
| 31      | 29 not 30                                                                                                                                                                                                              | 1838    |
| 32      | limit 31 to yr="1990 -Current"                                                                                                                                                                                         | 1805    |
| 33      | remove duplicates from 32                                                                                                                                                                                              | 1695    |

**Medline (via PubMed): updated 5 April 2018**

| Search | Query                                                                                                                                                                                                                  | Results |
|--------|------------------------------------------------------------------------------------------------------------------------------------------------------------------------------------------------------------------------|---------|
| 1      | Dementia/ or exp Alzheimer Disease/                                                                                                                                                                                    | 118649  |
| 2      | Cognitive Dysfunction/                                                                                                                                                                                                 | 7920    |
| 3      | Cognition/                                                                                                                                                                                                             | 82659   |
| 4      | (dementia or alzheimer*).ti,ab.                                                                                                                                                                                        | 178991  |
| 5      | ((cognit* or memory or mental) adj3 (impair* or decline* or deficit* or reduc* or function*)).ti,ab.                                                                                                                   | 171636  |
| 6      | or/1-5                                                                                                                                                                                                                 | 378202  |
| 7      | Primary Prevention/                                                                                                                                                                                                    | 16649   |
| 8      | prevent*.ti,ab.                                                                                                                                                                                                        | 1222908 |
| 9      | (protect* or reduc* or delay* or improv* or increas* or decreas*).ti.                                                                                                                                                  | 1008130 |
| 10     | or/7-9                                                                                                                                                                                                                 | 2152629 |
| 11     | 6 and 10                                                                                                                                                                                                               | 46477   |
| 12     | Dementia/pc or exp Alzheimer Disease/pc or Cognitive Dysfunction/pc or Cognition Disorders/pc [Prevention & Control]                                                                                                   | 6391    |
| 13     | Cognitive Reserve/                                                                                                                                                                                                     | 388     |
| 14     | cognitive reserve.ti,ab.                                                                                                                                                                                               | 949     |
| 15     | or/11-14                                                                                                                                                                                                               | 50722   |
| 16     | exp Education, Continuing/                                                                                                                                                                                             | 58777   |
| 17     | ((continuing or adult) adj2 (education or training)).af.                                                                                                                                                               | 77985   |
| 18     | (lifelong learning or life-long learning).af.                                                                                                                                                                          | 2438    |
| 19     | education/ or exp curriculum/ or exp education, distance/ or exp education, nonprofessional/ or exp educational measurement/ or exp international educational exchange/ or mentoring/ or exp schools/ or exp teaching/ | 561833  |
| 20     | Learning/                                                                                                                                                                                                              | 57102   |
| 21     | Students/                                                                                                                                                                                                              | 48337   |
| 22     | exp Educational Status/                                                                                                                                                                                                | 47241   |
| 23     | (learn* or class or classes or course? or educat* or school* or train* or seminar* or tutor*).ti.                                                                                                                      | 571948  |
| 24     | education.fs. not exp Health Personnel/ed                                                                                                                                                                              | 199668  |
| 25     | (cognitiv* adj2 (stimulat* or activit*)).ti.                                                                                                                                                                           | 773     |
| 26     | (late-life adj2 (activity or activities or learn* or school* or educat* or training)).ti,ab.                                                                                                                           | 93      |
| 27     | or/16-26                                                                                                                                                                                                               | 1135186 |
| 28     | 15 and 27                                                                                                                                                                                                              | 4360    |
| 29     | exp Dementia/dt [Drug Therapy]                                                                                                                                                                                         | 18096   |
| 30     | 28 not 29                                                                                                                                                                                                              | 4227    |
| 31     | exp animals/ not exp humans/                                                                                                                                                                                           | 4439627 |
| 32     | 30 not 31                                                                                                                                                                                                              | 3347    |
| 33     | exp age groups/ not (exp aged/ or middle aged/)                                                                                                                                                                        | 3685655 |
| 34     | 32 not 33                                                                                                                                                                                                              | 2546    |
| 35     | (201707* or 201708* or 201709* or 20171* or 2018*).ed.                                                                                                                                                                 | 749049  |
| 36     | ("2017/07*" or "2017/08*" or "2017/09*" or "2017/1*" or 2018*).dt.                                                                                                                                                     | 942206  |
| 37     | 35 or 36                                                                                                                                                                                                               | 1540516 |
| 38     | 34 and 37                                                                                                                                                                                                              | 364     |
| 39     | limit 34 to yr="2017 -Current"                                                                                                                                                                                         | 348     |
| 40     | 38 or 39                                                                                                                                                                                                               | 435     |

## Cochrane Library (10 July 2017)

| Cochrane Library |                                                                                                                                                                                                                                          |        |
|------------------|------------------------------------------------------------------------------------------------------------------------------------------------------------------------------------------------------------------------------------------|--------|
| Search           | Query                                                                                                                                                                                                                                    | Hits   |
| #1               | [mh ^Dementia] or [mh "Alzheimer Disease"]                                                                                                                                                                                               | 4053   |
| #2               | [mh ^"Cognitive Dysfunction"]                                                                                                                                                                                                            | 0      |
| #3               | [mh ^Cognition]                                                                                                                                                                                                                          | 6276   |
| #4               | (dementia or alzheimer*):ti,ab,kw                                                                                                                                                                                                        | 11882  |
| #5               | ((cognit* or memory or mental) near/3 (impair* or decline* or deficit* or reduc* or function*)):ti,ab                                                                                                                                    | 16173  |
| #6               | {or #1-#5}                                                                                                                                                                                                                               | 27711  |
| #7               | [mh ^"Primary Prevention"]                                                                                                                                                                                                               | 1008   |
| #8               | prevent*:ti,ab,kw                                                                                                                                                                                                                        | 107750 |
| #9               | (protect* or reduc* or delay* or improv*):ti                                                                                                                                                                                             | 77161  |
| #10              | {or #7-#9}                                                                                                                                                                                                                               | 175365 |
| #11              | #6 and #10                                                                                                                                                                                                                               | 4432   |
| #12              | [mh Dementia/pc] or [mh ^"Cognitive Dysfunction"/pc]                                                                                                                                                                                     | 208    |
| #13              | #11 or #12                                                                                                                                                                                                                               | 4532   |
| #14              | [mh "Education, Continuing"]                                                                                                                                                                                                             | 1168   |
| #15              | ((continuing or adult) near/2 (education or training)):ti,ab,kw                                                                                                                                                                          | 2819   |
| #16              | ("lifelong learning" or "life-long learning"):ti,ab,kw                                                                                                                                                                                   | 19     |
| #17              | [mh ^education] or [mh curriculum] or [mh "education, distance"] or [mh "education, nonprofessional"] or [mh "educational measurement"] or [mh "international educational exchange"] or [mh ^mentoring] or [mh schools] or [mh teaching] | 21839  |
| #18              | [mh ^Learning]                                                                                                                                                                                                                           | 1809   |
| #19              | [mh ^Students]                                                                                                                                                                                                                           | 2041   |
| #20              | [mh "Educational Status"]                                                                                                                                                                                                                | 1348   |
| #21              | (learn* or class or classes or course or courses or educat* or school* or train* or seminar* or tutor*):ti                                                                                                                               | 45060  |
| #22              | (cognitiv* near/2 (stimulat* or activit*)):ti                                                                                                                                                                                            | 212    |
| #23              | (learning or ((education or training) near/2 (nonprofessional or non-professional or distance)) or teaching):kw                                                                                                                          | 12784  |
| #24              | {or #14-#23}                                                                                                                                                                                                                             | 67085  |
| #25              | #13 and #24                                                                                                                                                                                                                              | 784    |
| #26              | [mh "age groups"] not ([mh aged] or [mh "middle aged"])                                                                                                                                                                                  | 104635 |
| #27              | #25 not #26                                                                                                                                                                                                                              | 691    |
| #28              | #27 Publication Year from 1990 to 2017                                                                                                                                                                                                   | 691    |

## Cochrane Library (updated 9 April 2018)

| ID  | Search                                                                                                                                                                                                                                   | Hits   |
|-----|------------------------------------------------------------------------------------------------------------------------------------------------------------------------------------------------------------------------------------------|--------|
| #1  | [mh ^Dementia] or [mh "Alzheimer Disease"]                                                                                                                                                                                               | 4263   |
| #2  | [mh ^"Cognitive Dysfunction"]                                                                                                                                                                                                            | 450    |
| #3  | [mh ^Cognition]                                                                                                                                                                                                                          | 6675   |
| #4  | (dementia or alzheimer*):ti,ab,kw                                                                                                                                                                                                        | 13099  |
| #5  | ((cognit* or memory or mental) near/3 (impair* or decline* or deficit* or reduc* or function*)):ti,ab                                                                                                                                    | 18089  |
| #6  | {or #1-#5}                                                                                                                                                                                                                               | 30564  |
| #7  | [mh ^"Primary Prevention"]                                                                                                                                                                                                               | 1065   |
| #8  | prevent*:ti,ab,kw                                                                                                                                                                                                                        | 115159 |
| #9  | (protect* or reduc* or delay* or improv* or increas* or decreas*):ti                                                                                                                                                                     | 102653 |
| #10 | {or #7-#9}                                                                                                                                                                                                                               | 205354 |
| #11 | #6 and #10                                                                                                                                                                                                                               | 5434   |
| #12 | [mh Dementia/pc] or [mh ^"Cognitive Dysfunction"/pc] or [mh ^"Cognition Disorders"/pc]                                                                                                                                                   | 603    |
| #13 | [mh ^"Cognitive Reserve"]                                                                                                                                                                                                                | 8      |
| #14 | cognitive reserve:ti,ab,kw                                                                                                                                                                                                               | 51     |
| #15 | {or #11-#14}                                                                                                                                                                                                                             | 5791   |
| #16 | [mh "Education, Continuing"]                                                                                                                                                                                                             | 1209   |
| #17 | ((continuing or adult) near/2 (education or training)):ti,ab,kw                                                                                                                                                                          | 3051   |
| #18 | ("lifelong learning" or "life-long learning"):ti,ab,kw                                                                                                                                                                                   | 21     |
| #19 | [mh ^education] or [mh curriculum] or [mh "education, distance"] or [mh "education, nonprofessional"] or [mh "educational measurement"] or [mh "international educational exchange"] or [mh ^mentoring] or [mh schools] or [mh teaching] | 26602  |
| #20 | [mh ^Learning]                                                                                                                                                                                                                           | 1962   |
| #21 | [mh ^Students]                                                                                                                                                                                                                           | 2250   |
| #22 | [mh "Educational Status"]                                                                                                                                                                                                                | 1407   |
| #23 | (learn* or class or classes or course or courses or educat* or school* or train* or seminar* or tutor*):ti                                                                                                                               | 48313  |
| #24 | (cognitiv* near/2 (stimulat* or activit*)):ti                                                                                                                                                                                            | 246    |
| #25 | (learning or ((education or training) near/2 (nonprofessional or non-professional or distance)) or teaching):kw                                                                                                                          | 14622  |
| #26 | (late-life near/2 (activity or activities or learn* or school* or educat* or training)):ti,ab,kw                                                                                                                                         | 8      |
| #27 | {or #16-#26}                                                                                                                                                                                                                             | 75572  |
| #28 | #15 and #27                                                                                                                                                                                                                              | 1055   |
| #29 | [mh "age groups"] not ([mh aged] or [mh "middle aged"])                                                                                                                                                                                  | 109483 |
| #30 | #28 not #29                                                                                                                                                                                                                              | 937    |
| #31 | #30 Publication Year from 2017 to 2018                                                                                                                                                                                                   | 106    |

## Embase (10 July 2017)

| Embase |                                                                                                                                                                                                                                 |         |
|--------|---------------------------------------------------------------------------------------------------------------------------------------------------------------------------------------------------------------------------------|---------|
| Search | Query                                                                                                                                                                                                                           | Hits    |
| #1     | 'dementia'/de                                                                                                                                                                                                                   | 97110   |
| #2     | 'alzheimer disease'/exp                                                                                                                                                                                                         | 156558  |
| #3     | 'mild cognitive impairment'/exp                                                                                                                                                                                                 | 17067   |
| #4     | dementia:ti,ab OR alzheimer*:ti,ab                                                                                                                                                                                              | 226442  |
| #5     | ((cognit* OR memory OR mental) NEAR/3 (impair* OR decline* OR deficit* OR reduc* OR function*)):ti,ab                                                                                                                           | 221649  |
| #6     | #1 OR #2 OR #3 OR #4 OR #5                                                                                                                                                                                                      | 432689  |
| #7     | 'primary prevention'/exp                                                                                                                                                                                                        | 33540   |
| #8     | 'preventive medicine'/exp                                                                                                                                                                                                       | 25875   |
| #9     | prevent*:ti,ab                                                                                                                                                                                                                  | 1469112 |
| #10    | protect*:ti OR reduc*:ti OR delay*:ti OR improv*:ti                                                                                                                                                                             | 850362  |
| #11    | #7 OR #8 OR #9 OR #10                                                                                                                                                                                                           | 2260166 |
| #12    | #6 AND #11                                                                                                                                                                                                                      | 49357   |
| #13    | 'dementia'/dm_pc                                                                                                                                                                                                                | 1833    |
| #14    | 'mild cognitive impairment'/exp/dm_pc                                                                                                                                                                                           | 90      |
| #15    | 'alzheimer disease'/exp/dm_pc                                                                                                                                                                                                   | 4342    |
| #16    | #12 OR #13 OR #14 OR #15                                                                                                                                                                                                        | 52112   |
| #17    | 'continuing education'/exp OR 'continuing education provider'/exp                                                                                                                                                               | 29360   |
| #18    | ((continuing OR adult) NEAR/2 (education OR training)):ti,ab                                                                                                                                                                    | 24617   |
| #19    | lifelong learning':ti,ab OR 'life-long learning':ti,ab                                                                                                                                                                          | 1695    |
| #20    | 'education'/de OR 'adult education'/exp OR 'lifelong learning'/exp OR 'mentoring'/exp OR 'masters education'/exp OR 'postdoctoral education'/exp OR 'postgraduate education'/exp OR 'community college'/exp OR 'university'/exp | 466817  |
| #21    | learn*:ti OR class:ti OR classes:ti OR course*:ti OR educat*:ti OR school*:ti OR train*:ti OR seminar*:ti OR tutor*:ti                                                                                                          | 633869  |
| #22    | (cognitiv* NEAR/2 (stimulat* OR activit*)):ti                                                                                                                                                                                   | 930     |
| #23    | #17 OR #18 OR #19 OR #20 OR #21 OR #22                                                                                                                                                                                          | 1006895 |
| #24    | #16 AND #23                                                                                                                                                                                                                     | 3837    |
| #25    | 'animal'/exp NOT 'human'/exp                                                                                                                                                                                                    | 4833576 |
| #26    | #24 NOT #25                                                                                                                                                                                                                     | 2924    |
| #27    | 'groups by age'/exp NOT ('middle aged'/exp OR 'aged'/exp)                                                                                                                                                                       | 5653684 |
| #28    | #26 NOT #27                                                                                                                                                                                                                     | 2223    |
| #29    | #28 AND [1990-2017]/py                                                                                                                                                                                                          | 2199    |
| #30    | 'medication therapy management'/exp OR 'dementia'/exp/dm_dt OR 'pharmaceutical vehicles and additives'/exp                                                                                                                      | 1386295 |
| #31    | #29 NOT #30                                                                                                                                                                                                                     | 2022    |
| #32    | #31 NOT 'conference abstract'/it                                                                                                                                                                                                | 996     |



**Embase (updated 9 April 2018)**

| No. | Query                                                                                                                                                                                                                           | Hits    |
|-----|---------------------------------------------------------------------------------------------------------------------------------------------------------------------------------------------------------------------------------|---------|
| #1  | 'dementia'/exp                                                                                                                                                                                                                  | 308108  |
| #2  | 'alzheimer disease'/exp                                                                                                                                                                                                         | 167836  |
| #3  | 'mild cognitive impairment'/exp                                                                                                                                                                                                 | 19554   |
| #4  | dementia:ti,ab OR alzheimer*:ti,ab                                                                                                                                                                                              | 245698  |
| #5  | ((cognit* OR memory OR mental) NEAR/3 (impair* OR decline* OR deficit* OR reduc* OR function*)):ti,ab                                                                                                                           | 244483  |
| #6  | #1 OR #2 OR #3 OR #4 OR #5                                                                                                                                                                                                      | 519886  |
| #7  | 'primary prevention'/exp                                                                                                                                                                                                        | 35604   |
| #8  | 'preventive medicine'/exp                                                                                                                                                                                                       | 26670   |
| #9  | prevent*:ti,ab                                                                                                                                                                                                                  | 1576370 |
| #10 | protect*:ti OR reduc*:ti OR delay*:ti OR improv*:ti OR increas*:ti OR decreas*:ti                                                                                                                                               | 1272239 |
| #11 | #7 OR #8 OR #9 OR #10                                                                                                                                                                                                           | 2758722 |
| #12 | #6 AND #11                                                                                                                                                                                                                      | 66376   |
| #13 | 'dementia'/dm_pc                                                                                                                                                                                                                | 1929    |
| #14 | 'mild cognitive impairment'/exp/dm_pc                                                                                                                                                                                           | 101     |
| #15 | 'alzheimer disease'/exp/dm_pc                                                                                                                                                                                                   | 4515    |
| #16 | 'cognitive reserve'/exp                                                                                                                                                                                                         | 1346    |
| #17 | 'cognitive reserve':ti,ab                                                                                                                                                                                                       | 1463    |
| #18 | #12 OR #13 OR #14 OR #15 OR #16 OR #17                                                                                                                                                                                          | 70716   |
| #19 | 'continuing education'/exp OR 'continuing education provider'/exp                                                                                                                                                               | 30115   |
| #20 | ((continuing OR adult) NEAR/2 (education OR training)):ti,ab                                                                                                                                                                    | 25787   |
| #21 | 'lifelong learning':ti,ab OR 'life-long learning':ti,ab                                                                                                                                                                         | 1820    |
| #22 | 'education'/de OR 'adult education'/exp OR 'lifelong learning'/exp OR 'mentoring'/exp OR 'masters education'/exp OR 'postdoctoral education'/exp OR 'postgraduate education'/exp OR 'community college'/exp OR 'university'/exp | 492706  |
| #23 | learn*:ti OR class:ti OR classes:ti OR course*:ti OR educat*:ti OR school*:ti OR train*:ti OR seminar*:ti OR tutor*:ti                                                                                                          | 669572  |
| #24 | (cognitiv* NEAR/2 (stimulat* OR activit*)):ti                                                                                                                                                                                   | 1040    |
| #25 | ('late life' NEAR/2 (activity OR activities OR learn* OR school* OR educat* OR training)):ti,ab                                                                                                                                 | 131     |
| #26 | #19 OR #20 OR #21 OR #22 OR #23 OR #24 OR #25                                                                                                                                                                                   | 1064036 |
| #27 | #18 AND #26                                                                                                                                                                                                                     | 5231    |
| #28 | 'animal'/exp NOT 'human'/exp                                                                                                                                                                                                    | 5020589 |
| #29 | #27 NOT #28                                                                                                                                                                                                                     | 4140    |
| #30 | 'groups by age'/exp NOT ('middle aged'/exp OR 'aged'/exp)                                                                                                                                                                       | 6115551 |
| #31 | #29 NOT #30                                                                                                                                                                                                                     | 3114    |
| #32 | 'medication therapy management'/exp OR 'dementia'/exp/dm_dt OR 'pharmaceutical vehicles and additives'/exp                                                                                                                      | 1465869 |
| #33 | #31 NOT #32                                                                                                                                                                                                                     | 2862    |
| #34 | #33 NOT 'conference abstract'/it                                                                                                                                                                                                | 1380    |
| #35 | #34 AND [1-7-2017]/sd NOT [9-4-2018]/sd                                                                                                                                                                                         | 131     |
| #36 | #34 AND [2017-2018]/py                                                                                                                                                                                                          | 174     |
| #37 | #35 OR #36                                                                                                                                                                                                                      | 189     |

## CINHAL (10 July 2017)

| Search | Query                                                                                                                                                                                                                | Limiters/Expanders                      | Hits   |
|--------|----------------------------------------------------------------------------------------------------------------------------------------------------------------------------------------------------------------------|-----------------------------------------|--------|
| S1     | (MH "Dementia") OR (MH "Alzheimer's Disease")                                                                                                                                                                        | Search modes - Find all my search terms | 37751  |
| S2     | dementia OR alzheimer*                                                                                                                                                                                               | Search modes - Find all my search terms | 46604  |
| S3     | ((cognit* OR memory OR mental) N3 (impair* OR decline* OR deficit* OR reduc* OR function*))                                                                                                                          | Search modes - Find all my search terms | 29346  |
| S4     | S1 OR S2 OR S3                                                                                                                                                                                                       | Search modes - Find all my search terms | 67725  |
| S5     | (MH "Preventive Health Care")                                                                                                                                                                                        | Search modes - Find all my search terms | 1075   |
| S6     | TI prevent* OR AB prevent*                                                                                                                                                                                           | Search modes - Find all my search terms | 170718 |
| S7     | TI (protect* OR reduc* OR delay* OR improv*)                                                                                                                                                                         | Search modes - Find all my search terms | 124328 |
| S8     | S5 OR S6 OR S7                                                                                                                                                                                                       | Search modes - Find all my search terms | 290518 |
| S9     | S4 AND S8                                                                                                                                                                                                            | Search modes - Find all my search terms | 6261   |
| S10    | (MH "Dementia/PC") OR (MH "Alzheimer's Disease/PC")                                                                                                                                                                  | Search modes - Find all my search terms | 2009   |
| S11    | S9 OR S10                                                                                                                                                                                                            | Search modes - Find all my search terms | 7692   |
| S12    | (MH "Education, Continuing") OR (MH "Continuing Education Providers") OR (MH "Education, Diploma Programs") OR (MH "Education, Continuing (Credit)") OR (MH "Education, Masters") OR (MH "Education, Post-Doctoral") | Search modes - Find all my search terms | 87064  |
| S13    | (MH "Learning") OR (MH "Lifelong Learning")                                                                                                                                                                          | Search modes - Find all my search terms | 10771  |
| S14    | (MH "Education, Nonprofessional") OR (MH "Adult Education") OR (MH "Education, Non-Traditional+")                                                                                                                    | Search modes - Find all my search terms | 7406   |
| S15    | TI (learn* OR class OR classes OR course* OR educat* OR school* OR train* OR seminar* OR tutor*) OR TI (cognitiv* N2 (stimulat* OR activit*))                                                                        | Search modes - Find all my search terms | 180228 |

|    |     |                                   |                            |
|----|-----|-----------------------------------|----------------------------|
| 1  |     |                                   |                            |
| 2  |     |                                   |                            |
| 3  |     |                                   |                            |
| 4  |     | "lifelong learning" OR "life-long |                            |
| 5  |     | learning" OR ((continuing OR      |                            |
| 6  |     | adult) N2 (education OR           |                            |
| 7  |     | training))                        | Search modes - Find all my |
| 8  | S16 |                                   | search terms 106290        |
| 9  |     | S12 OR S13 OR S14 OR S15 OR       | Search modes - Find all my |
| 10 | S17 | S16                               | search terms 27,763        |
| 11 |     |                                   | Search modes - Find all my |
| 12 | S18 | S11 AND S17                       | search terms 667           |
| 13 |     |                                   | Search modes - Find all my |
| 14 | S19 | MH "Animal Studies"               | search terms 39763         |
| 15 |     |                                   | Search modes - Find all my |
| 16 | S20 | S18 NOT S19                       | search terms 618           |
| 17 |     |                                   | Search modes - Find all my |
| 18 |     | MH "Named Groups by Age+"         |                            |
| 19 |     | NOT (MH "Middle Age" OR MH        | Search modes - Find all my |
| 20 | S21 | "Aged+")                          | search terms 55371         |
| 21 |     |                                   | Search modes - Find all my |
| 22 | S22 | S20 NOT S21                       | search terms 552           |
| 23 |     |                                   | Limiters - Published Date: |
| 24 | S23 | S22                               | 19900101-20171231 557      |
| 25 |     |                                   |                            |
| 26 |     |                                   |                            |
| 27 |     |                                   |                            |
| 28 |     |                                   |                            |
| 29 |     |                                   |                            |
| 30 |     |                                   |                            |
| 31 |     |                                   |                            |
| 32 |     |                                   |                            |
| 33 |     |                                   |                            |
| 34 |     |                                   |                            |
| 35 |     |                                   |                            |
| 36 |     |                                   |                            |
| 37 |     |                                   |                            |
| 38 |     |                                   |                            |
| 39 |     |                                   |                            |
| 40 |     |                                   |                            |
| 41 |     |                                   |                            |
| 42 |     |                                   |                            |
| 43 |     |                                   |                            |
| 44 |     |                                   |                            |
| 45 |     |                                   |                            |
| 46 |     |                                   |                            |
| 47 |     |                                   |                            |
| 48 |     |                                   |                            |
| 49 |     |                                   |                            |
| 50 |     |                                   |                            |
| 51 |     |                                   |                            |
| 52 |     |                                   |                            |
| 53 |     |                                   |                            |
| 54 |     |                                   |                            |
| 55 |     |                                   |                            |
| 56 |     |                                   |                            |
| 57 |     |                                   |                            |
| 58 |     |                                   |                            |
| 59 |     |                                   |                            |
| 60 |     |                                   |                            |

**CINHAL (8 April 2018)**

| Search | Query                                                                                                                                                                                                                | Limiters/Expanders                      | Results |
|--------|----------------------------------------------------------------------------------------------------------------------------------------------------------------------------------------------------------------------|-----------------------------------------|---------|
| S1     | (MH "Dementia") OR (MH "Alzheimer's Disease")                                                                                                                                                                        | Search modes - Find all my search terms | 40,224  |
| S2     | dementia OR alzheimer*                                                                                                                                                                                               | Search modes - Find all my search terms | 50,090  |
| S3     | ((cognit* OR memory OR mental) N3 (impair* OR decline* OR deficit* OR reduc* OR function*))                                                                                                                          | Search modes - Find all my search terms | 32,856  |
| S4     | S1 OR S2 OR S3                                                                                                                                                                                                       | Search modes - Find all my search terms | 73,809  |
| S5     | (MH "Preventive Health Care")                                                                                                                                                                                        | Search modes - Find all my search terms | 11,313  |
| S6     | TI prevent* OR AB prevent*                                                                                                                                                                                           | Search modes - Find all my search terms | 186,284 |
| S7     | TI (protect* OR reduc* OR delay* OR improv*)                                                                                                                                                                         | Search modes - Find all my search terms | 134,37  |
| S8     | S5 OR S6 OR S7                                                                                                                                                                                                       | Search modes - Find all my search terms | 315,336 |
| S9     | S4 AND S8                                                                                                                                                                                                            | Search modes - Find all my search terms | 7,002   |
| S10    | (MH "Dementia/PC") OR (MH "Alzheimer's Disease/PC")                                                                                                                                                                  | Search modes - Find all my search terms | 2,127   |
| S11    | S9 OR S10                                                                                                                                                                                                            | Search modes - Find all my search terms | 8,479   |
| S12    | (MH "Education, Continuing") OR (MH "Continuing Education Providers") OR (MH "Education, Diploma Programs") OR (MH "Education, Continuing (Credit)") OR (MH "Education, Masters") OR (MH "Education, Post-Doctoral") | Search modes - Find all my search terms | 89,104  |
| S13    | (MH "Learning") OR (MH "Lifelong Learning")                                                                                                                                                                          | Search modes - Find all my search terms | 11,971  |
| S14    | (MH "Education, Nonprofessional") OR (MH "Adult Education") OR (MH "Education, Non-Traditional+")                                                                                                                    | Search modes - Find all my search terms | 7,799   |
| S15    | TI (learn* OR class OR classes OR course* OR educat* OR school* OR train* OR seminar* OR tutor*) OR TI (cognitiv* N2 (stimulat* OR activit*))                                                                        | Search modes - Find all my search terms | 191,967 |
| S16    | "lifelong learning" OR "life-long learning" OR ((continuing OR adult) N2 (education OR training)) OR ("late life" N1 (activity OR activities OR learn* OR school* OR educat* OR training))                           | Search modes - Find all my search terms | 109,49  |

|    |     |                                                               |                                         |         |
|----|-----|---------------------------------------------------------------|-----------------------------------------|---------|
| 1  |     |                                                               |                                         |         |
| 2  |     |                                                               |                                         |         |
| 3  | S17 | S12 OR S13 OR S14 OR S15 OR S16                               | Search modes - Find all my search terms | 290,595 |
| 4  |     |                                                               |                                         |         |
| 5  | S18 | S11 AND S17                                                   | Search modes - Find all my search terms | 753     |
| 6  |     |                                                               |                                         |         |
| 7  | S19 | MH "Animal Studies"                                           | Search modes - Find all my search terms | 43,810  |
| 8  |     |                                                               |                                         |         |
| 9  | S20 | S18 NOT S19                                                   | Search modes - Find all my search terms | 691     |
| 10 |     |                                                               |                                         |         |
| 11 | S21 | MH "Named Groups by Age+" NOT (MH "Middle Age" OR MH "Aged+") | Search modes - Find all my search terms | 595,044 |
| 12 |     |                                                               |                                         |         |
| 13 | S22 | S20 NOT S21                                                   | Search modes - Find all my search terms | 617     |
| 14 |     |                                                               |                                         |         |
| 15 | S23 | S22                                                           | Limiters - Published Date: 20170101-    | 78      |
| 16 |     |                                                               |                                         |         |
| 17 | S24 | S22 AND EM 20170701-                                          | Search modes - Find all my search terms | 66      |
| 18 |     |                                                               |                                         |         |
| 19 | S25 | S23 OR S24                                                    | Search modes - Find all my search terms | 95      |
| 20 |     |                                                               |                                         |         |
| 21 |     |                                                               |                                         |         |
| 22 |     |                                                               |                                         |         |
| 23 |     |                                                               |                                         |         |
| 24 |     |                                                               |                                         |         |
| 25 |     |                                                               |                                         |         |
| 26 |     |                                                               |                                         |         |
| 27 |     |                                                               |                                         |         |
| 28 |     |                                                               |                                         |         |
| 29 |     |                                                               |                                         |         |
| 30 |     |                                                               |                                         |         |
| 31 |     |                                                               |                                         |         |
| 32 |     |                                                               |                                         |         |
| 33 |     |                                                               |                                         |         |
| 34 |     |                                                               |                                         |         |
| 35 |     |                                                               |                                         |         |
| 36 |     |                                                               |                                         |         |
| 37 |     |                                                               |                                         |         |
| 38 |     |                                                               |                                         |         |
| 39 |     |                                                               |                                         |         |
| 40 |     |                                                               |                                         |         |
| 41 |     |                                                               |                                         |         |
| 42 |     |                                                               |                                         |         |
| 43 |     |                                                               |                                         |         |
| 44 |     |                                                               |                                         |         |
| 45 |     |                                                               |                                         |         |
| 46 |     |                                                               |                                         |         |
| 47 |     |                                                               |                                         |         |
| 48 |     |                                                               |                                         |         |
| 49 |     |                                                               |                                         |         |
| 50 |     |                                                               |                                         |         |
| 51 |     |                                                               |                                         |         |
| 52 |     |                                                               |                                         |         |
| 53 |     |                                                               |                                         |         |
| 54 |     |                                                               |                                         |         |
| 55 |     |                                                               |                                         |         |
| 56 |     |                                                               |                                         |         |
| 57 |     |                                                               |                                         |         |
| 58 |     |                                                               |                                         |         |
| 59 |     |                                                               |                                         |         |
| 60 |     |                                                               |                                         |         |

## ERIC (10 July 2017)

| Search | Query                                                                                                                                                                                                                                                                                                          | Limiters/Expanders                      | Hits   |
|--------|----------------------------------------------------------------------------------------------------------------------------------------------------------------------------------------------------------------------------------------------------------------------------------------------------------------|-----------------------------------------|--------|
| S1     | DE "Dementia" OR DE "Alzheimers Disease"                                                                                                                                                                                                                                                                       | Search modes - Find all my search terms | 1036   |
| S2     | DE "Cognitive Ability"                                                                                                                                                                                                                                                                                         | Search modes - Find all my search terms | 8133   |
| S3     | dementia OR alzheimer*                                                                                                                                                                                                                                                                                         | Search modes - Find all my search terms | 1286   |
| S4     | ((cognit* OR memory OR mental) N3 (impair* OR decline* OR deficit* OR reduc* OR function*))                                                                                                                                                                                                                    | Search modes - Find all my search terms | 6424   |
| S5     | S1 OR S2 OR S3 OR S4                                                                                                                                                                                                                                                                                           | Search modes - Find all my search terms | 14489  |
| S6     | (DE "Early Intervention" OR DE "Prevention") OR (DE "Preventive Medicine")                                                                                                                                                                                                                                     | Search modes - Find all my search terms | 22132  |
| S7     | TI prevent* OR AB prevent*                                                                                                                                                                                                                                                                                     | Search modes - Find all my search terms | 33142  |
| S8     | TI (protect* OR reduc* OR delay* OR improv*)                                                                                                                                                                                                                                                                   | Search modes - Find all my search terms | 30866  |
| S9     | S6 OR S7 OR S8                                                                                                                                                                                                                                                                                                 | Search modes - Find all my search terms | 71745  |
| S10    | S5 AND S9                                                                                                                                                                                                                                                                                                      | Search modes - Find all my search terms | 828    |
| S11    | DE "Adult Education" OR DE "Adult Basic Education" OR DE "Continuing Education" OR DE "Migrant Adult Education" OR DE "Preretirement Education" OR DE "Public School Adult Education" OR DE "Veterans Education"                                                                                               | Search modes - Find all my search terms | 56528  |
| S12    | DE "Adult Learning" OR DE "Adult Programs" OR DE "Adult Reading Programs" OR DE "High School Equivalency Programs" OR DE "Evening Programs" OR DE "Part Time Students" OR DE "Distance Education" OR DE "Extension Education" OR DE "External Degree Programs" OR DE "Rural Extension" OR DE "Urban Extension" | Search modes - Find all my search terms | 35681  |
| S13    | (DE "Adult Students") OR (DE "Evening Students")                                                                                                                                                                                                                                                               | Search modes - Find all my search terms | 7787   |
| S14    | ((DE "Nonschool Educational Programs") OR (DE "Community Education")) OR (DE "Postsecondary Education" OR DE "Higher Education")                                                                                                                                                                               | Search modes - Find all my search terms | 431319 |

|    |     |                                                                                                        |                                                 |        |
|----|-----|--------------------------------------------------------------------------------------------------------|-------------------------------------------------|--------|
| 1  |     |                                                                                                        |                                                 |        |
| 2  |     |                                                                                                        |                                                 |        |
| 3  |     |                                                                                                        |                                                 |        |
| 4  | S15 | DE "Continuing Education Units" OR<br>DE "Lifelong Learning"                                           | Search modes - Find all my<br>search terms      | 8046   |
| 5  |     |                                                                                                        |                                                 |        |
| 6  |     | TI (learn* OR class OR classes OR<br>course* OR educat* OR school* OR<br>train* OR seminar* OR tutor*) | Search modes - Find all my<br>search terms      | 555016 |
| 7  | S16 |                                                                                                        |                                                 |        |
| 8  |     | TI (cognitiv* N2 (stimulat* OR<br>activit*))                                                           | Search modes - Find all my<br>search terms      | 94     |
| 9  | S17 |                                                                                                        |                                                 |        |
| 10 |     | ((continuing OR adult) N2 (education<br>OR training))                                                  | Search modes - Find all my<br>search terms      | 76187  |
| 11 | S18 |                                                                                                        |                                                 |        |
| 12 |     | "lifelong learning" or "life-long<br>learning"                                                         | Search modes - Find all my<br>search terms      | 10135  |
| 13 | S19 |                                                                                                        |                                                 |        |
| 14 |     | S11 OR S12 OR S13 OR S14 OR S15 OR<br>S16 OR S17 OR S18 OR S19                                         | Search modes - Find all my<br>search terms      | 851728 |
| 15 | S20 |                                                                                                        |                                                 |        |
| 16 |     | S10 AND S20                                                                                            | Search modes - Find all my<br>search terms      | 286    |
| 17 | S21 |                                                                                                        |                                                 |        |
| 18 |     | S21                                                                                                    | Limiters - Date Published:<br>19900101-20171231 | 234    |
| 19 | S22 |                                                                                                        |                                                 |        |
| 20 |     |                                                                                                        |                                                 |        |
| 21 |     |                                                                                                        |                                                 |        |
| 22 |     |                                                                                                        |                                                 |        |
| 23 |     |                                                                                                        |                                                 |        |
| 24 |     |                                                                                                        |                                                 |        |
| 25 |     |                                                                                                        |                                                 |        |
| 26 |     |                                                                                                        |                                                 |        |
| 27 |     |                                                                                                        |                                                 |        |
| 28 |     |                                                                                                        |                                                 |        |
| 29 |     |                                                                                                        |                                                 |        |
| 30 |     |                                                                                                        |                                                 |        |
| 31 |     |                                                                                                        |                                                 |        |
| 32 |     |                                                                                                        |                                                 |        |
| 33 |     |                                                                                                        |                                                 |        |
| 34 |     |                                                                                                        |                                                 |        |
| 35 |     |                                                                                                        |                                                 |        |
| 36 |     |                                                                                                        |                                                 |        |
| 37 |     |                                                                                                        |                                                 |        |
| 38 |     |                                                                                                        |                                                 |        |
| 39 |     |                                                                                                        |                                                 |        |
| 40 |     |                                                                                                        |                                                 |        |
| 41 |     |                                                                                                        |                                                 |        |
| 42 |     |                                                                                                        |                                                 |        |
| 43 |     |                                                                                                        |                                                 |        |
| 44 |     |                                                                                                        |                                                 |        |
| 45 |     |                                                                                                        |                                                 |        |
| 46 |     |                                                                                                        |                                                 |        |
| 47 |     |                                                                                                        |                                                 |        |
| 48 |     |                                                                                                        |                                                 |        |
| 49 |     |                                                                                                        |                                                 |        |
| 50 |     |                                                                                                        |                                                 |        |
| 51 |     |                                                                                                        |                                                 |        |
| 52 |     |                                                                                                        |                                                 |        |
| 53 |     |                                                                                                        |                                                 |        |
| 54 |     |                                                                                                        |                                                 |        |
| 55 |     |                                                                                                        |                                                 |        |
| 56 |     |                                                                                                        |                                                 |        |
| 57 |     |                                                                                                        |                                                 |        |
| 58 |     |                                                                                                        |                                                 |        |
| 59 |     |                                                                                                        |                                                 |        |
| 60 |     |                                                                                                        |                                                 |        |

**ERIC (8 April 2018)**

| Search | Query                                                                                                                                                                                                                                                                                                          | Limiters/Expanders                      | Results |
|--------|----------------------------------------------------------------------------------------------------------------------------------------------------------------------------------------------------------------------------------------------------------------------------------------------------------------|-----------------------------------------|---------|
| S1     | DE "Dementia" OR DE "Alzheimers Disease"                                                                                                                                                                                                                                                                       | Search modes - Find all my search terms | 1,075   |
| S2     | DE "Cognitive Ability"                                                                                                                                                                                                                                                                                         | Search modes - Find all my search terms | 8,553   |
| S3     | dementia OR alzheimer*                                                                                                                                                                                                                                                                                         | Search modes - Find all my search terms | 1,332   |
| S4     | ((cognit* OR memory OR mental) N3 (impair* OR decline* OR deficit* OR reduc* OR function*))                                                                                                                                                                                                                    | Search modes - Find all my search terms | 6,684   |
| S5     | S1 OR S2 OR S3 OR S4                                                                                                                                                                                                                                                                                           | Search modes - Find all my search terms | 15,155  |
| S6     | (DE "Early Intervention" OR DE "Prevention") OR (DE "Preventive Medicine")                                                                                                                                                                                                                                     | Search modes - Find all my search terms | 22,911  |
| S7     | TI prevent* OR AB prevent*                                                                                                                                                                                                                                                                                     | Search modes - Find all my search terms | 34,284  |
| S8     | TI (protect* OR reduc* OR delay* OR improv*)                                                                                                                                                                                                                                                                   | Search modes - Find all my search terms | 32,348  |
| S9     | S6 OR S7 OR S8                                                                                                                                                                                                                                                                                                 | Search modes - Find all my search terms | 74,665  |
| S10    | S5 AND S9                                                                                                                                                                                                                                                                                                      | Search modes - Find all my search terms | 873     |
| S11    | DE "Adult Education" OR DE "Adult Basic Education" OR DE "Continuing Education" OR DE "Migrant Adult Education" OR DE "Preretirement Education" OR DE "Public School Adult Education" OR DE "Veterans Education"                                                                                               | Search modes - Find all my search terms | 57,669  |
| S12    | DE "Adult Learning" OR DE "Adult Programs" OR DE "Adult Reading Programs" OR DE "High School Equivalency Programs" OR DE "Evening Programs" OR DE "Part Time Students" OR DE "Distance Education" OR DE "Extension Education" OR DE "External Degree Programs" OR DE "Rural Extension" OR DE "Urban Extension" | Search modes - Find all my search terms | 36,853  |
| S13    | (DE "Adult Students") OR (DE "Evening Students")                                                                                                                                                                                                                                                               | Search modes - Find all my search terms | 8,01    |
| S14    | ((DE "Nonschool Educational Programs") OR (DE "Community Education")) OR (DE "Postsecondary Education" OR DE "Higher Education")                                                                                                                                                                               | Search modes - Find all my search terms | 452,212 |
| S15    | DE "Continuing Education Units" OR DE "Lifelong Learning"                                                                                                                                                                                                                                                      | Search modes - Find all my search terms | 8,311   |
| S16    | TI (learn* OR class OR classes OR course* OR educat* OR school* OR train* OR seminar* OR tutor*)                                                                                                                                                                                                               | Search modes - Find all my search terms | 579,695 |



|    |     |                                                                                     |                                         |         |
|----|-----|-------------------------------------------------------------------------------------|-----------------------------------------|---------|
| 1  |     |                                                                                     |                                         |         |
| 2  |     |                                                                                     |                                         |         |
| 3  | S17 | T1 (cognitiv* N2 (stimulat* OR activit*))                                           | Search modes - Find all my search terms | 102     |
| 4  |     |                                                                                     |                                         |         |
| 5  | S18 | ((continuing OR adult) N2 (education OR training))                                  | Search modes - Find all my search terms | 77,861  |
| 6  |     |                                                                                     |                                         |         |
| 7  | S19 | "late life" N2 (activity OR activities OR learn* OR school* OR educat* OR training) | Search modes - Find all my search terms | 17      |
| 8  |     |                                                                                     |                                         |         |
| 9  | S20 | "lifelong learning" OR "life-long learning"                                         | Search modes - Find all my search terms | 10,521  |
| 10 |     |                                                                                     |                                         |         |
| 11 | S21 | S11 OR S12 OR S13 OR S14 OR S15 OR S16 OR S17 OR S18 OR S19 OR S20                  | Search modes - Find all my search terms | 887,984 |
| 12 |     |                                                                                     |                                         |         |
| 13 | S22 | S10 AND S21                                                                         | Search modes - Find all my search terms | 309     |
| 14 |     |                                                                                     |                                         |         |
| 15 | S23 | S22                                                                                 | Limiters - Date Published: 20170101-    | 16      |
| 16 |     |                                                                                     |                                         |         |
| 17 | S24 | S22 AND EM 20170701-                                                                | Search modes - Find all my search terms | 0       |
| 18 |     |                                                                                     |                                         |         |
| 19 | S25 | S23 OR S24                                                                          | Search modes - Find all my search terms | 16      |
| 20 |     |                                                                                     |                                         |         |
| 21 |     |                                                                                     |                                         |         |
| 22 |     |                                                                                     |                                         |         |
| 23 |     |                                                                                     |                                         |         |
| 24 |     |                                                                                     |                                         |         |
| 25 |     |                                                                                     |                                         |         |
| 26 |     |                                                                                     |                                         |         |
| 27 |     |                                                                                     |                                         |         |
| 28 |     |                                                                                     |                                         |         |
| 29 |     |                                                                                     |                                         |         |
| 30 |     |                                                                                     |                                         |         |
| 31 |     |                                                                                     |                                         |         |
| 32 |     |                                                                                     |                                         |         |
| 33 |     |                                                                                     |                                         |         |
| 34 |     |                                                                                     |                                         |         |
| 35 |     |                                                                                     |                                         |         |
| 36 |     |                                                                                     |                                         |         |
| 37 |     |                                                                                     |                                         |         |
| 38 |     |                                                                                     |                                         |         |
| 39 |     |                                                                                     |                                         |         |
| 40 |     |                                                                                     |                                         |         |
| 41 |     |                                                                                     |                                         |         |
| 42 |     |                                                                                     |                                         |         |
| 43 |     |                                                                                     |                                         |         |
| 44 |     |                                                                                     |                                         |         |
| 45 |     |                                                                                     |                                         |         |
| 46 |     |                                                                                     |                                         |         |
| 47 |     |                                                                                     |                                         |         |
| 48 |     |                                                                                     |                                         |         |
| 49 |     |                                                                                     |                                         |         |
| 50 |     |                                                                                     |                                         |         |
| 51 |     |                                                                                     |                                         |         |
| 52 |     |                                                                                     |                                         |         |
| 53 |     |                                                                                     |                                         |         |
| 54 |     |                                                                                     |                                         |         |
| 55 |     |                                                                                     |                                         |         |
| 56 |     |                                                                                     |                                         |         |
| 57 |     |                                                                                     |                                         |         |
| 58 |     |                                                                                     |                                         |         |
| 59 |     |                                                                                     |                                         |         |
| 60 |     |                                                                                     |                                         |         |

### PsycINFO (11 July 2017)

| Search | Query                                                                                                                                                                                          | Limiters/Expanders                           | Results   |
|--------|------------------------------------------------------------------------------------------------------------------------------------------------------------------------------------------------|----------------------------------------------|-----------|
| S1     | DE "Alzheimer's Disease"                                                                                                                                                                       | Search modes - Find all my search terms      | 39,900    |
| S2     | DE "Senile Dementia"                                                                                                                                                                           | Search modes - Find all my search terms      | 1,063     |
| S3     | DE "Cognitive Impairment"                                                                                                                                                                      | Search modes - Find all my search terms      | 30,409    |
| S4     | S1 OR S2 OR S3                                                                                                                                                                                 | Search modes - Find all my search terms      | 65,198    |
| S5     | DE "Prevention" OR DE "Preventive Medicine" OR DE "Primary Mental Health Prevention"                                                                                                           | Search modes - Find all my search terms      | 30,316    |
| S6     | TI prevent* OR AB prevent*                                                                                                                                                                     | Search modes - Find all my search terms      | 186,041   |
| S7     | TI protect* OR reduc* OR delay* OR improv*                                                                                                                                                     | Search modes - Find all my search terms      | 743,335   |
| S8     | S5 OR S6 OR S7                                                                                                                                                                                 | Search modes - Find all my search terms      | 869,214   |
| S9     | S4 AND S8                                                                                                                                                                                      | Search modes - Find all my search terms      | 21,587    |
| S10    | DE "Adult Education" OR DE "Continuing Education"                                                                                                                                              | Search modes - Find all my search terms      | 4,126     |
| S11    | TI (learning OR education OR educational OR training)                                                                                                                                          | Search modes - Find all my search terms      | 259,848   |
| S12    | TI cognitiv* N1 (stimulat* OR activit*)                                                                                                                                                        | Search modes - Find all my search terms      | 751       |
| S13    | "lifelong learning" OR "life-long learning"                                                                                                                                                    | Search modes - Find all my search terms      | 2,995     |
| S14    | (continuing OR adult) N2 (education OR training)                                                                                                                                               | Search modes - Find all my search terms      | 15,241    |
| S15    | S9 AND S11                                                                                                                                                                                     | Search modes - Find all my search terms      | 826       |
| S16    | (ZG "adolescence (13-17 yrs)" or ZG "adulthood (18 yrs & older)" or ZG "childhood (birth-12 yrs)") not (ZG "aged (65 yrs & older)" or ZG "middle age (40-64 yrs)")                             | Search modes - Find all my search terms      | 1,626,731 |
| S17    | S15 NOT S16                                                                                                                                                                                    | Search modes - Find all my search terms      | 683       |
| S18    | (DE "Health Education") OR (DE "Drug Therapy") OR (DE "Animals") OR DE "Animal Models" OR TI (rat OR rats OR mouse OR mice OR dog OR dogs) OR SU (rat OR rats OR mouse OR mice OR dog OR dogs) | Search modes - Find all my search terms      | 454,796   |
| S19    | S17 NOT S18                                                                                                                                                                                    | Search modes - Find all my search terms      | 414       |
| S20    | S17 NOT S18                                                                                                                                                                                    | Limiters - Published Date: 19900101-20171231 | 403       |

**PsycINFO (9 April 2018)**

| #   | Query                                                                                       | Limiters/Expanders                      | Results |
|-----|---------------------------------------------------------------------------------------------|-----------------------------------------|---------|
| S1  | DE "Alzheimer's Disease"                                                                    | Search modes - Find all my search terms | 41,992  |
| S2  | DE "Senile Dementia"                                                                        | Search modes - Find all my search terms | 1,063   |
| S3  | DE "Cognitive Impairment"                                                                   | Search modes - Find all my search terms | 32,064  |
| S4  | dementia OR alzheimer*                                                                      | Search modes - Find all my search terms | 99,018  |
| S5  | ((cognit* OR memory OR mental) N3 (impair* OR decline* OR deficit* OR reduc* OR function*)) | Search modes - Find all my search terms | 146,484 |
| S6  | S1 OR S2 OR S3 OR S4 OR S5                                                                  | Search modes - Find all my search terms | 210,638 |
| S7  | DE "Prevention" OR DE "Preventive Medicine" OR DE "Primary Mental Health Prevention"        | Search modes - Find all my search terms | 31,621  |
| S8  | TI prevent* OR AB prevent*                                                                  | Search modes - Find all my search terms | 195,469 |
| S9  | TI protect* OR reduc* OR delay* OR improv*                                                  | Search modes - Find all my search terms | 783,317 |
| S10 | S7 OR S8 OR S9                                                                              | Search modes - Find all my search terms | 914,878 |
| S11 | S6 AND S10                                                                                  | Search modes - Find all my search terms | 71,575  |
| S12 | DE "Cognitive Reserve"                                                                      | Search modes - Find all my search terms | 353     |
| S13 | "Cognitive Reserve"                                                                         | Search modes - Find all my search terms | 985     |
| S14 | S11 OR S12 OR S13                                                                           | Search modes - Find all my search terms | 72,193  |
| S15 | DE "Adult Education" OR DE "Continuing Education"                                           | Search modes - Find all my search terms | 4,2     |
| S16 | TI (learning OR education OR educational OR training)                                       | Search modes - Find all my search terms | 269,992 |
| S17 | TI cognitiv* N1 (stimulat* OR activit*)                                                     | Search modes - Find all my search terms | 794     |
| S18 | "lifelong learning" OR "life-long learning"                                                 | Search modes - Find all my search terms | 3,169   |
| S19 | (continuing OR adult) N2 (education OR training)                                            | Search modes - Find all my search terms | 15,885  |
| S20 | "late life" N2 (activity OR activities OR learn* OR school* OR educat* OR training)         | Search modes - Find all my search terms | 159     |
| S21 | S15 OR S16 OR S17 OR S18 OR S19 OR S20                                                      | Search modes - Find all my search terms | 281,675 |

|     |                                                                                                                                                                                                |                                         |           |
|-----|------------------------------------------------------------------------------------------------------------------------------------------------------------------------------------------------|-----------------------------------------|-----------|
| S22 | S14 AND S21                                                                                                                                                                                    | Search modes - Find all my search terms | 4,549     |
| S23 | (ZG "adolescence (13-17 yrs)" or ZG "adulthood (18 yrs & older)" or ZG "childhood (birth-12 yrs)") not (ZG "aged (65 yrs & older)" or ZG "middle age (40-64 yrs)")                             | Search modes - Find all my search terms | 1,695,649 |
| S24 | S22 NOT S23                                                                                                                                                                                    | Search modes - Find all my search terms | 3,295     |
| S25 | (DE "Health Education") OR (DE "Drug Therapy") OR (DE "Animals") OR DE "Animal Models" OR TI (rat OR rats OR mouse OR mice OR dog OR dogs) OR SU (rat OR rats OR mouse OR mice OR dog OR dogs) | Search modes - Find all my search terms | 465,312   |
| S26 | S24 NOT S25                                                                                                                                                                                    | Search modes - Find all my search terms | 2,094     |
| S27 | S26                                                                                                                                                                                            | Limiters - Publication Year: 2017-      | 276       |
| S28 | S26 AND RD 201707-                                                                                                                                                                             | Search modes - Find all my search terms | 197       |
| S29 | S27 OR S28                                                                                                                                                                                     | Search modes - Find all my search terms | 299       |

**ClinicalTrials.gov (16 May 2017)**

**280 studies found for:** (prevention OR reduction OR risk OR improvement) AND (dementia OR alzheimer OR "cognitive impairment" OR "cognitive decline") | healthy OR aged OR adult OR cognitive | education OR learning OR lesson OR educational OR class OR mental OR cognitive | Adult, Senior | Studies that accept healthy volunteers

**ClinicalTrials.gov (9 April 2018)**

**58 Studies found for:** (prevention OR reduction OR risk OR improvement) AND (dementia OR alzheimer OR "cognitive impairment" OR "cognitive decline") | healthy OR aged OR adult OR cognitive | education OR learning OR lesson OR educational OR class OR mental OR cognitive | Adult, Senior | Studies that accept healthy volunteers | First posted from 05/01/2017 to 04/09/2018

**ICTRP (16 May 2017)**

| ICTRP    |                                     |                                                                                                                                                              |
|----------|-------------------------------------|--------------------------------------------------------------------------------------------------------------------------------------------------------------|
| Search 1 | 21 records for 20 trials found for: | dementia AND education* AND prevent* OR alzheimer AND education* AND prevent* OR cognitive impairment AND education* AND prevent*                            |
| Search 2 | 3 records for 3 trials found for:   | dementia AND mental activ* AND prevent* OR alzheimer AND mental activ* AND prevent* OR cognitive impairment AND mental activ* AND prevent*                   |
| Search 3 | 3 records for 3 trials found for:   | dementia AND cognitive stimulat* AND prevent* OR alzheimer AND cognitive stimulat* AND prevent* OR cognitive impairment AND cognitive stimulat* AND prevent* |
| Search 4 | 11 records for 11 trials found for: | dementia AND learning AND prevent* OR alzheimer AND learning AND prevent* OR cognitive impairment AND learning AND prevent*                                  |
| Search 5 | No results were found for:          | dementia AND lesson* AND prevent* OR alzheimer AND lesson* AND prevent* OR cognitive impairment AND lesson* AND prevent*                                     |
| Search 6 | 45 records for 45 trials found for: | dementia AND training AND prevent* OR alzheimer AND training AND prevent* OR cognitive impairment AND training AND prevent*                                  |
| SUM      | <b>82</b>                           |                                                                                                                                                              |

**ICTRP (9 April 2018)**

|          |     |                                                                                                                                                              |
|----------|-----|--------------------------------------------------------------------------------------------------------------------------------------------------------------|
| Search 1 | 20  | dementia AND education* AND prevent* OR alzheimer AND education* AND prevent* OR cognitive impairment AND education* AND prevent*                            |
| Search 2 | 3   | dementia AND mental activ* AND prevent* OR alzheimer AND mental activ* AND prevent* OR cognitive impairment AND mental activ* AND prevent*                   |
| Search 3 | 5   | dementia AND cognitive stimulat* AND prevent* OR alzheimer AND cognitive stimulat* AND prevent* OR cognitive impairment AND cognitive stimulat* AND prevent* |
| Search 4 | 27  | dementia AND learning AND prevent* OR alzheimer AND learning AND prevent* OR cognitive impairment AND learning AND prevent*                                  |
| Search 5 | 1   | dementia AND lesson* AND prevent* OR alzheimer AND lesson* AND prevent* OR cognitive impairment AND lesson* AND prevent*                                     |
| Search 6 | 64  | dementia AND training AND prevent* OR alzheimer AND training AND prevent* OR cognitive impairment AND training AND prevent*                                  |
| SUM      | 120 |                                                                                                                                                              |

**ALOIS (15 May 2017)**

## ALOIS

---

|            |                                                        |
|------------|--------------------------------------------------------|
| Study Aim: | Cognitive Enhancement (healthy);<br>Primary Prevention |
|------------|--------------------------------------------------------|

---

|                    |                     |
|--------------------|---------------------|
| Intervention type: | Non-pharmacological |
|--------------------|---------------------|

---

|               |                   |                                   |
|---------------|-------------------|-----------------------------------|
| Intervention: | Contains any word | learning education<br>educational |
|---------------|-------------------|-----------------------------------|

---

---

**18** Studies found

**ALOIS (9 April 2018)**

Not searched website down

**DART-Europe (16 May 2017)**

| search                                                                                                                                                                | results |
|-----------------------------------------------------------------------------------------------------------------------------------------------------------------------|---------|
| (dementia OR alzheimer* OR "cognitive impairment") AND (education* OR "mental activity" OR "mental activities" OR "cognitive stimulation") AND (prevent* OR improve*) | 43      |

**DART-Europe (8 April 2018)**

| search                                                                                                                                                                | results |
|-----------------------------------------------------------------------------------------------------------------------------------------------------------------------|---------|
| (dementia OR alzheimer* OR "cognitive impairment") AND (education* OR "mental activity" OR "mental activities" OR "cognitive stimulation") AND (prevent* OR improve*) | 56      |
| YEAR: 2017                                                                                                                                                            | 4       |



## Supplementary file 4: Search Strategies of Overview of Systematic Reviews, by database

### Medline (via PubMed): 10 July 2017

| #  | Suchen                                                                                                                                                                                                                                                                                                                                                                                                                                                 | Ergebnisse |
|----|--------------------------------------------------------------------------------------------------------------------------------------------------------------------------------------------------------------------------------------------------------------------------------------------------------------------------------------------------------------------------------------------------------------------------------------------------------|------------|
| 1  | Dementia/ or exp Alzheimer Disease/                                                                                                                                                                                                                                                                                                                                                                                                                    | 117573     |
| 2  | Cognitive Dysfunction/                                                                                                                                                                                                                                                                                                                                                                                                                                 | 5969       |
| 3  | Cognition/                                                                                                                                                                                                                                                                                                                                                                                                                                             | 81563      |
| 4  | (dementia or alzheimer*).ti,ab.                                                                                                                                                                                                                                                                                                                                                                                                                        | 175194     |
| 5  | ((cognit* or memory or mental) adj3 (impair* or decline* or deficit* or reduc* or function*)).ti,ab.                                                                                                                                                                                                                                                                                                                                                   | 167110     |
| 6  | or/1-5                                                                                                                                                                                                                                                                                                                                                                                                                                                 | 371089     |
| 7  | exp Leisure Activities/                                                                                                                                                                                                                                                                                                                                                                                                                                | 209051     |
| 8  | leisure.ti,ab.                                                                                                                                                                                                                                                                                                                                                                                                                                         | 13073      |
| 9  | (hobby or hobbies).ti,ab.                                                                                                                                                                                                                                                                                                                                                                                                                              | 1465       |
| 10 | free time.ti,ab.                                                                                                                                                                                                                                                                                                                                                                                                                                       | 1405       |
| 11 | Recreation.ti,ab.                                                                                                                                                                                                                                                                                                                                                                                                                                      | 4826       |
| 12 | (in-door or out-door or indoor or outdoor).ti.                                                                                                                                                                                                                                                                                                                                                                                                         | 8929       |
| 13 | (garden* or horticultur*).ti.                                                                                                                                                                                                                                                                                                                                                                                                                          | 3216       |
| 14 | (play* or game? or gaming).ti.                                                                                                                                                                                                                                                                                                                                                                                                                         | 46562      |
| 15 | (creativ* or painting or drawing or reading).ti.                                                                                                                                                                                                                                                                                                                                                                                                       | 24387      |
| 16 | (voluntary or volunteer* or extracurricular).ti.                                                                                                                                                                                                                                                                                                                                                                                                       | 32266      |
| 17 | or/7-16                                                                                                                                                                                                                                                                                                                                                                                                                                                | 321695     |
| 18 | 6 and 17                                                                                                                                                                                                                                                                                                                                                                                                                                               | 9189       |
| 19 | exp age groups/ not (exp aged/ or middle aged/)                                                                                                                                                                                                                                                                                                                                                                                                        | 3712487    |
| 20 | 18 not 19                                                                                                                                                                                                                                                                                                                                                                                                                                              | 6496       |
| 21 | (systematic or structured or evidence or trials).ti. and ((review or overview or look or examination or update* or summary).ti. or review.pt.)                                                                                                                                                                                                                                                                                                         | 118333     |
| 22 | (0266-4623 or 1469-493X or 1366-5278 or 1530-440X).is.                                                                                                                                                                                                                                                                                                                                                                                                 | 15710      |
| 23 | meta-analysis.pt. or Network Meta-Analysis/ or (meta-analys* or meta analys* or metaanalys* or meta synth* or meta-synth* or metasynth*).tw,hw.                                                                                                                                                                                                                                                                                                        | 145368     |
| 24 | review.pt. and ((medline or medlars or embase or pubmed or scisearch or psychinfo or psycinfo or psychlit or psyclit or cinahl or electronic database* or bibliographic database* or computeri#ed database* or online database* or pooling or pooled or mantel haenszel or peto or dersimonian or der simonian or fixed effect or ((hand adj2 search*) or (manual* adj2 search*))).tw,hw. or (retraction of publication or retracted publication).pt.) | 117882     |
| 25 | ((systematic or meta) adj2 (analys* or review)).ti,kf. or ((systematic* or quantitativ* or methodologic*) adj5 (review* or overview*)).tw,hw. or (quantitativ\$ adj5 synthesis\$).tw,hw.                                                                                                                                                                                                                                                               | 171997     |

|    |    |                                                                        |        |
|----|----|------------------------------------------------------------------------|--------|
| 1  |    |                                                                        |        |
| 2  |    |                                                                        |        |
| 3  | 26 | (integrative research review* or research integration).tw. or scoping  | 167686 |
| 4  |    | review?.ti,kf. or (review.ti,kf,pt. and (trials as topic or studies as |        |
| 5  |    | topic).hw.) or (evidence adj3 review*).ti,ab,kf.                       |        |
| 6  |    |                                                                        |        |
| 7  | 27 | 21 or 22 or 23 or 24 or 25 or 26                                       | 412039 |
| 8  | 28 | 27 not (case report/ or letter.pt.)                                    | 401602 |
| 9  | 29 | 20 and 28                                                              | 243    |
| 10 | 30 | remove duplicates from 29                                              | 229    |
| 11 |    |                                                                        |        |
| 12 |    |                                                                        |        |
| 13 |    |                                                                        |        |
| 14 |    |                                                                        |        |
| 15 |    |                                                                        |        |
| 16 |    |                                                                        |        |
| 17 |    |                                                                        |        |
| 18 |    |                                                                        |        |
| 19 |    |                                                                        |        |
| 20 |    |                                                                        |        |
| 21 |    |                                                                        |        |
| 22 |    |                                                                        |        |
| 23 |    |                                                                        |        |
| 24 |    |                                                                        |        |
| 25 |    |                                                                        |        |
| 26 |    |                                                                        |        |
| 27 |    |                                                                        |        |
| 28 |    |                                                                        |        |
| 29 |    |                                                                        |        |
| 30 |    |                                                                        |        |
| 31 |    |                                                                        |        |
| 32 |    |                                                                        |        |
| 33 |    |                                                                        |        |
| 34 |    |                                                                        |        |
| 35 |    |                                                                        |        |
| 36 |    |                                                                        |        |
| 37 |    |                                                                        |        |
| 38 |    |                                                                        |        |
| 39 |    |                                                                        |        |
| 40 |    |                                                                        |        |
| 41 |    |                                                                        |        |
| 42 |    |                                                                        |        |
| 43 |    |                                                                        |        |
| 44 |    |                                                                        |        |
| 45 |    |                                                                        |        |
| 46 |    |                                                                        |        |
| 47 |    |                                                                        |        |
| 48 |    |                                                                        |        |
| 49 |    |                                                                        |        |
| 50 |    |                                                                        |        |
| 51 |    |                                                                        |        |
| 52 |    |                                                                        |        |
| 53 |    |                                                                        |        |
| 54 |    |                                                                        |        |
| 55 |    |                                                                        |        |
| 56 |    |                                                                        |        |
| 57 |    |                                                                        |        |
| 58 |    |                                                                        |        |
| 59 |    |                                                                        |        |
| 60 |    |                                                                        |        |

1  
2  
3  
4  
5  
6  
7  
8  
9  
10  
11  
12  
13  
14  
15  
16  
17  
18  
19  
20  
21  
22  
23  
24  
25  
26  
27  
28  
29  
30  
31  
32  
33  
34  
35  
36  
37  
38  
39  
40  
41  
42  
43  
44  
45  
46  
47  
48  
49  
50  
51  
52  
53  
54  
55  
56  
57  
58  
59  
60

### Medline (via PubMed): 4 April 2018

| #  | Searches                                                                                                                                                                                                                                                                                                                                                                                                                                               | Results |
|----|--------------------------------------------------------------------------------------------------------------------------------------------------------------------------------------------------------------------------------------------------------------------------------------------------------------------------------------------------------------------------------------------------------------------------------------------------------|---------|
| 1  | Dementia/ or exp Alzheimer Disease/                                                                                                                                                                                                                                                                                                                                                                                                                    | 118622  |
| 2  | Cognitive Dysfunction/                                                                                                                                                                                                                                                                                                                                                                                                                                 | 7904    |
| 3  | Cognition/                                                                                                                                                                                                                                                                                                                                                                                                                                             | 82628   |
| 4  | Cognitive Reserve/                                                                                                                                                                                                                                                                                                                                                                                                                                     | 388     |
| 5  | (dementia or alzheimer*).ti,ab.                                                                                                                                                                                                                                                                                                                                                                                                                        | 179042  |
| 6  | ((cognit* or memory or mental) adj3 (impair* or decline* or deficit* or reduc* or function*)).ti,ab.                                                                                                                                                                                                                                                                                                                                                   | 171766  |
| 7  | or/1-6                                                                                                                                                                                                                                                                                                                                                                                                                                                 | 378437  |
| 8  | exp Leisure Activities/                                                                                                                                                                                                                                                                                                                                                                                                                                | 207917  |
| 9  | leisure.ti,ab.                                                                                                                                                                                                                                                                                                                                                                                                                                         | 13201   |
| 10 | (hobby or hobbies).ti,ab.                                                                                                                                                                                                                                                                                                                                                                                                                              | 1472    |
| 11 | free time.ti,ab.                                                                                                                                                                                                                                                                                                                                                                                                                                       | 1429    |
| 12 | Recreation.ti,ab.                                                                                                                                                                                                                                                                                                                                                                                                                                      | 4900    |
| 13 | (in-door or out-door or indoor or outdoor).ti.                                                                                                                                                                                                                                                                                                                                                                                                         | 9232    |
| 14 | (garden* or horticultur*).ti.                                                                                                                                                                                                                                                                                                                                                                                                                          | 3312    |
| 15 | (play* or game? or gaming).ti.                                                                                                                                                                                                                                                                                                                                                                                                                         | 47658   |
| 16 | (creativ* or painting or drawing or reading).ti.                                                                                                                                                                                                                                                                                                                                                                                                       | 24235   |
| 17 | (voluntary or volunteer* or extracurricular).ti.                                                                                                                                                                                                                                                                                                                                                                                                       | 32218   |
| 18 | (cognitiv* adj2 (activity or activities)).ti.                                                                                                                                                                                                                                                                                                                                                                                                          | 521     |
| 19 | or/8-18                                                                                                                                                                                                                                                                                                                                                                                                                                                | 322366  |
| 20 | 7 and 19                                                                                                                                                                                                                                                                                                                                                                                                                                               | 9826    |
| 21 | exp age groups/ not (exp aged/ or middle aged/)                                                                                                                                                                                                                                                                                                                                                                                                        | 3685197 |
| 22 | 20 not 21                                                                                                                                                                                                                                                                                                                                                                                                                                              | 6996    |
| 23 | (systematic or structured or evidence or trials).ti. and ((review or overview or look or examination or update* or summary).ti. or review.pt.)                                                                                                                                                                                                                                                                                                         | 126873  |
| 24 | (0266-4623 or 1469-493X or 1366-5278 or 1530-440X).is.                                                                                                                                                                                                                                                                                                                                                                                                 | 15689   |
| 25 | meta-analysis.pt. or Network Meta-Analysis/ or (meta-analys* or meta analys* or metaanalys* or meta synth* or meta-synth* or metasynt*).tw,hw.                                                                                                                                                                                                                                                                                                         | 151505  |
| 26 | review.pt. and ((medline or medlars or embase or pubmed or scisearch or psychinfo or psycinfo or psychlit or psyclit or cinahl or electronic database* or bibliographic database* or computeri#ed database* or online database* or pooling or pooled or mantel haenszel or peto or dersimonian or der simonian or fixed effect or ((hand adj2 search*) or (manual* adj2 search*))).tw,hw. or (retraction of publication or retracted publication).pt.) | 125835  |
| 27 | ((systematic or meta) adj2 (analys* or review)).ti,kf. or ((systematic* or quantitativ* or methodologic*) adj5 (review* or overview*)).tw,hw. or (quantitativ\$ adj5 synthesis\$).tw,hw.                                                                                                                                                                                                                                                               | 184250  |

|    |                                                                                                                                                                                               |         |
|----|-----------------------------------------------------------------------------------------------------------------------------------------------------------------------------------------------|---------|
| 28 | (integrative research review* or research integration).tw. or scoping review?.ti,kf. or (review.ti,kf,pt. and (trials as topic or studies as topic).hw.) or (evidence adj3 review*).ti,ab,kf. | 168915  |
| 29 | 23 or 24 or 25 or 26 or 27 or 28                                                                                                                                                              | 425049  |
| 30 | 29 not (case report/ or letter.pt.)                                                                                                                                                           | 414173  |
| 31 | 22 and 30                                                                                                                                                                                     | 283     |
| 32 | ("2017/07*" or "2017/08*" or "2017/09*" or "2017/1*" or 2018*).dt.                                                                                                                            | 947449  |
| 33 | (201707* or 201708* or 201709* or 20171* or 2018*).ed.                                                                                                                                        | 745570  |
| 34 | 32 or 33                                                                                                                                                                                      | 1543513 |
| 35 | 31 and 34                                                                                                                                                                                     | 53      |
| 36 | remove duplicates from 35                                                                                                                                                                     | 52      |

## Embase: 17 Juli 2017

| No. | Query                                                                                                                                                                                 | Results |
|-----|---------------------------------------------------------------------------------------------------------------------------------------------------------------------------------------|---------|
| #1  | 'alzheimer disease'/exp                                                                                                                                                               | 158632  |
| #2  | 'mild cognitive impairment'/exp                                                                                                                                                       | 17483   |
| #3  | 'dementia'/de                                                                                                                                                                         | 98402   |
| #4  | dementia:ti,ab OR alzheimer*:ti,ab                                                                                                                                                    | 230453  |
| #5  | ((cognit* OR memory OR mental) NEAR/3 (impair* OR decline* OR deficit* OR reduc* OR function*)):ti,ab                                                                                 | 226651  |
| #6  | #1 OR #2 OR #3 OR #4 OR #5                                                                                                                                                            | 440912  |
| #7  | 'recreation'/exp                                                                                                                                                                      | 57806   |
| #8  | leisure:ti,ab                                                                                                                                                                         | 16016   |
| #9  | hobby:ti,ab OR hobbies:ti,ab                                                                                                                                                          | 2028    |
| #10 | 'free time':ti,ab                                                                                                                                                                     | 1939    |
| #11 | recreation:ti,ab                                                                                                                                                                      | 6442    |
| #12 | 'in door':ti OR 'out door':ti OR indoor:ti OR outdoor:ti                                                                                                                              | 11551   |
| #13 | garden*:ti OR horticultur*:ti                                                                                                                                                         | 3581    |
| #14 | play*:ti OR game:ti OR games:ti OR gaming:ti                                                                                                                                          | 52543   |
| #15 | creativ*:ti OR painting:ti OR drawing:ti OR reading:ti                                                                                                                                | 25887   |
| #16 | voluntary:ti OR volunteer*:ti OR extracurricular:ti                                                                                                                                   | 38793   |
| #17 | #7 OR #8 OR #9 OR #10 OR #11 OR #12 OR #13 OR #14 OR #15 OR #16                                                                                                                       | 196912  |
| #18 | #6 AND #17                                                                                                                                                                            | 5027    |
| #19 | 'groups by age'/exp AND ('middle aged'/exp OR 'aged'/exp)                                                                                                                             | 3258589 |
| #20 | #18 NOT #19                                                                                                                                                                           | 3277    |
| #21 | systematic review'/exp OR 'meta analysis'/exp                                                                                                                                         | 211886  |
| #22 | meta analys*:ti,ab OR metaanalys*:ti,ab OR 'meta synth*':ti,ab OR metasynt*:ti,ab OR ((systematic* OR quantitativ* OR methodologic*) NEAR/5 (review* OR overview* OR synthes*)):ti,ab | 239389  |
| #23 | systematic:ti OR structured:ti OR evidence:ti OR trials:ti AND (review:ti OR overview:ti OR look:ti OR examination:ti OR update*:ti OR summary:ti)                                    | 98173   |
| #24 | #21 OR #22 OR #23                                                                                                                                                                     | 306796  |
| #25 | #24 NOT ('case report'/exp OR 'case study'/exp)                                                                                                                                       | 301911  |
| #26 | #20 AND #25                                                                                                                                                                           | 128     |

**Embase: 4 April 2018**

| No. | Query                                                                                                                                                                                     | Results |
|-----|-------------------------------------------------------------------------------------------------------------------------------------------------------------------------------------------|---------|
| #1  | 'alzheimer disease'/exp                                                                                                                                                                   | 167669  |
| #2  | 'mild cognitive impairment'/exp OR 'dementia'/de                                                                                                                                          | 115768  |
| #3  | 'cognitive reserve'/de                                                                                                                                                                    | 1341    |
| #4  | dementia:ti,ab OR alzheimer*:ti,ab                                                                                                                                                        | 245434  |
| #5  | ((cognit* OR memory OR mental) NEAR/3 (impair* OR decline* OR deficit* OR reduc* OR function*)):ti,ab                                                                                     | 244167  |
| #6  | #1 OR #2 OR #3 OR #4 OR #5                                                                                                                                                                | 470026  |
| #7  | 'recreation'/exp                                                                                                                                                                          | 61588   |
| #8  | leisure:ti,ab                                                                                                                                                                             | 16979   |
| #9  | hobby:ti,ab OR hobbies:ti,ab                                                                                                                                                              | 2145    |
| #10 | 'free time':ti,ab                                                                                                                                                                         | 2061    |
| #11 | recreation:ti,ab                                                                                                                                                                          | 6767    |
| #12 | 'in door':ti OR 'out door':ti OR indoor:ti OR outdoor:ti                                                                                                                                  | 12183   |
| #13 | garden*:ti OR horticultur*:ti                                                                                                                                                             | 3745    |
| #14 | play*:ti OR game:ti OR games:ti OR gaming:ti                                                                                                                                              | 55639   |
| #15 | creativ*:ti OR painting:ti OR drawing:ti OR reading:ti                                                                                                                                    | 26738   |
| #16 | voluntary:ti OR volunteer*:ti OR extracurricular:ti OR ((cognitiv* NEAR/2 (activity OR activities)):ti)                                                                                   | 39956   |
| #17 | #7 OR #8 OR #9 OR #10 OR #11 OR #12 OR #13 OR #14 OR #15 OR #16                                                                                                                           | 207154  |
| #18 | #6 AND #17                                                                                                                                                                                | 5442    |
| #19 | 'groups by age'/exp AND ('middle aged'/exp OR 'aged'/exp)                                                                                                                                 | 345120  |
|     |                                                                                                                                                                                           | 2       |
| #20 | #18 NOT #19                                                                                                                                                                               | 3533    |
| #21 | 'systematic review'/exp OR 'meta analysis'/exp                                                                                                                                            | 239710  |
| #22 | 'meta analys*':ti,ab OR metaanalys*:ti,ab OR 'meta synth*':ti,ab OR metasynt*:ti,ab OR (((systematic* OR quantitativ* OR methodologic*) NEAR/5 (review* OR overview* OR synthes*)):ti,ab) | 267896  |
| #23 | (systematic:ti OR structured:ti OR evidence:ti OR trials:ti) AND (review:ti OR overview:ti OR look:ti OR examination:ti OR update*:ti OR summary:ti)                                      | 112383  |
| #24 | #21 OR #22 OR #23                                                                                                                                                                         | 342728  |
| #25 | #24 NOT ('case report'/exp OR 'case study'/exp)                                                                                                                                           | 337160  |
| #26 | #20 AND #25                                                                                                                                                                               | 145     |
| #27 | #26 AND [1-7-2017]/sd NOT [5-4-2018]/sd                                                                                                                                                   | 26      |
| #28 | #26 AND [2017-2018]/py                                                                                                                                                                    | 30      |
| #29 | #27 OR #28                                                                                                                                                                                | 35      |

## CINAHL (Ebsco): 17 July 2017

| #   | Query                                                                                                                                                                                                  | Limiters/Expanders                      | Results |
|-----|--------------------------------------------------------------------------------------------------------------------------------------------------------------------------------------------------------|-----------------------------------------|---------|
| S1  | (MH "Alzheimer's Disease") OR (MH "Dementia")                                                                                                                                                          | Search modes - Find all my search terms | 38,358  |
| S2  | dementia OR alzheimer*                                                                                                                                                                                 | Search modes - Find all my search terms | 47,332  |
| S3  | ((cognit* OR memory OR mental) N3 (impair* OR decline* OR deficit* OR reduc* OR function*))                                                                                                            | Search modes - Find all my search terms | 30,037  |
| S4  | S1 OR S2 OR S3                                                                                                                                                                                         | Search modes - Find all my search terms | 68,971  |
| S5  | (MH "Leisure Activities+")                                                                                                                                                                             | Search modes - Find all my search terms | 36,998  |
| S6  | leisure OR hobby OR hobbies OR "free time" OR Recreation                                                                                                                                               | Search modes - Find all my search terms | 11,096  |
| S7  | TI in-door OR out-door OR indoor OR outdoor OR garden* OR horticultur* OR play* OR game OR games OR gaming OR creativ* OR painting OR drawing OR reading OR voluntary OR volunteer* OR extracurricular | Search modes - Find all my search terms | 31,628  |
| S8  | S5 OR S6 OR S7                                                                                                                                                                                         | Search modes - Find all my search terms | 69,497  |
| S9  | S4 AND S8                                                                                                                                                                                              | Search modes - Find all my search terms | 2,053   |
| S10 | MH "Animal Studies"                                                                                                                                                                                    | Search modes - Find all my search terms | 41,599  |
| S11 | S9 NOT S10                                                                                                                                                                                             | Search modes - Find all my search terms | 2,051   |
| S12 | MH "Named Groups by Age+" NOT (MH "Middle Age" OR MH "Aged+")                                                                                                                                          | Search modes - Find all my search terms | 564,745 |
| S13 | S11 NOT S12                                                                                                                                                                                            | Search modes - Find all my search terms | 1,855   |
| S14 | (MH "Systematic Review") OR (MH "Meta Analysis")                                                                                                                                                       | Search modes - Find all my search terms | 42,089  |
| S15 | meta-analys* OR meta analys* OR metaanalys* OR meta synth* OR meta-synth* OR metasynth*                                                                                                                | Search modes - Boolean/Phrase           | 31,338  |
| S16 | (systematic* OR quantitativ* OR methodologic*) N4 (review* OR overview* OR synthes*)                                                                                                                   | Search modes - Boolean/Phrase           | 55,272  |
| S17 | TI (systematic OR structured OR evidence OR trials) AND (review OR overview OR look OR examination OR update* OR summary)                                                                              | Search modes - Boolean/Phrase           | 27,392  |
| S18 | S14 OR S15 OR S16 OR S17                                                                                                                                                                               | Search modes - Find all my search terms | 72,333  |
| S19 | S13 AND S18                                                                                                                                                                                            | Search modes - Find all my search terms | 71      |

**CINAHL (Ebsco): 4 April 2018**

| #   | Query                                                                                                                                                                                                                                                                               | Limiters/Expanders                      | Results |
|-----|-------------------------------------------------------------------------------------------------------------------------------------------------------------------------------------------------------------------------------------------------------------------------------------|-----------------------------------------|---------|
| S1  | (MH "Alzheimer's Disease")<br>OR (MH "Dementia")                                                                                                                                                                                                                                    | Search modes - Find all my search terms | 40,163  |
| S2  | dementia OR alzheimer*                                                                                                                                                                                                                                                              | Search modes - Find all my search terms | 50,045  |
| S3  | ((cognit* OR memory OR<br>mental) N3 (impair* OR<br>decline* OR deficit* OR<br>reduc* OR function*))                                                                                                                                                                                | Search modes - Find all my search terms | 32,819  |
| S4  | S1 OR S2 OR S3                                                                                                                                                                                                                                                                      | Search modes - Find all my search terms | 73,730  |
| S5  | (MH "Leisure Activities+")                                                                                                                                                                                                                                                          | Search modes - Find all my search terms | 39,894  |
| S6  | leisure OR hobby OR hobbies<br>OR "free time" OR<br>Recreation                                                                                                                                                                                                                      | Search modes - Find all my search terms | 11,740  |
| S7  | TI (in-door OR out-door OR<br>indoor OR outdoor OR<br>garden* OR horticultur* OR<br>play* OR game OR games OR<br>gaming OR creativ* OR<br>painting OR drawing OR<br>reading OR oluntary OR<br>volunteer* OR<br>extracurricular) OR TI<br>(cognitiv* W1 (activity OR<br>activities)) | Search modes - Find all my search terms | 33,266  |
| S8  | S5 OR S6 OR S7                                                                                                                                                                                                                                                                      | Search modes - Find all my search terms | 73,940  |
| S9  | S4 AND S8                                                                                                                                                                                                                                                                           | Search modes - Find all my search terms | 2,298   |
| S10 | MH "Animal Studies"                                                                                                                                                                                                                                                                 | Search modes - Find all my search terms | 43,752  |
| S11 | S9 NOT S10                                                                                                                                                                                                                                                                          | Search modes - Find all my search terms | 2,295   |
| S12 | MH "Named Groups by<br>Age+" NOT (MH "Middle<br>Age" OR MH "Aged+")                                                                                                                                                                                                                 | Search modes - Find all my search terms | 594,058 |
| S13 | S11 NOT S12                                                                                                                                                                                                                                                                         | Search modes - Find all my search terms | 2,079   |
| S14 | (MH "Systematic Review")<br>OR (MH "Meta Analysis")                                                                                                                                                                                                                                 | Search modes - Find all my search terms | 50,503  |
| S15 | meta-analys* OR meta<br>analys* OR metaanalys* OR                                                                                                                                                                                                                                   | Search modes - Boolean/Phrase           | 34,556  |



|     |                                                                                                                                       |                                                                                 |         |
|-----|---------------------------------------------------------------------------------------------------------------------------------------|---------------------------------------------------------------------------------|---------|
|     | meta synth* OR meta-synth*<br>OR metasynt*                                                                                            |                                                                                 |         |
| S16 | (systematic* OR quantitativ*<br>OR methodologic*) N4<br>(review* OR overview* OR<br>synthes*)                                         | Search modes - Boolean/Phrase                                                   | 63,373  |
| S17 | TI (systematic OR structured<br>OR evidence OR trials) AND<br>(review OR overview OR look<br>OR examination OR update*<br>OR summary) | Search modes - Boolean/Phrase                                                   | 30,586  |
| S18 | S14 OR S15 OR S16 OR S17                                                                                                              | Search modes - Find all my search terms                                         | 81,245  |
| S19 | S13 AND S18                                                                                                                           | Search modes - Find all my search terms                                         | 93      |
| S20 |                                                                                                                                       | Limiters - Published Date: 20170701-<br>Search modes - Find all my search terms | 156,794 |
| S21 | EM 20170701-                                                                                                                          | Search modes - Find all my search terms                                         | 208,855 |
| S22 | S20 OR S21                                                                                                                            | Search modes - Find all my search terms                                         | 253,372 |
| S23 | S22 AND S19                                                                                                                           | Search modes - Find all my search terms                                         | 27      |

1  
2  
3  
4  
5  
6  
7  
8  
9  
10  
11  
12  
13  
14  
15  
16  
17  
18  
19  
20  
21  
22  
23  
24  
25  
26  
27  
28  
29  
30  
31  
32  
33  
34  
35  
36  
37  
38  
39  
40  
41  
42  
43  
44  
45  
46  
47  
48  
49  
50  
51  
52  
53  
54  
55  
56  
57  
58  
59  
60

### PsycINFO (Ebsco): 18 July 2017

| #   | Query                                                                                                                                                                                                                                                                                                                                                                                                                | Limiters/Expanders                      | Results   |
|-----|----------------------------------------------------------------------------------------------------------------------------------------------------------------------------------------------------------------------------------------------------------------------------------------------------------------------------------------------------------------------------------------------------------------------|-----------------------------------------|-----------|
| S1  | DE "Alzheimer's Disease"                                                                                                                                                                                                                                                                                                                                                                                             | Search modes - Find all my search terms | 39,908    |
| S2  | DE "Senile Dementia"                                                                                                                                                                                                                                                                                                                                                                                                 | Search modes - Find all my search terms | 1,063     |
| S3  | DE "Cognitive Impairment"                                                                                                                                                                                                                                                                                                                                                                                            | Search modes - Find all my search terms | 30,416    |
| S4  | dementia OR alzheimer*                                                                                                                                                                                                                                                                                                                                                                                               | Search modes - Find all my search terms | 94,008    |
| S5  | ((cognit* OR memory OR mental) N3 (impair* OR decline* OR deficit* OR reduc* OR function*))                                                                                                                                                                                                                                                                                                                          | Search modes - Find all my search terms | 138,651   |
| S6  | S1 OR S2 OR S3 OR S4 OR S5                                                                                                                                                                                                                                                                                                                                                                                           | Search modes - Find all my search terms | 200,033   |
| S7  | (((((DE "Leisure Time") OR (DE "Hobbies")) AND (DE "Recreation" OR DE "Clubs (Social Organizations)" OR DE "Traveling" OR DE "Vacationing"))) OR (DE "Gambling")) AND (DE "Games" OR DE "Chess" OR DE "Computer Games"))                                                                                                                                                                                             | Search modes - Find all my search terms | 347       |
| S8  | leisure OR hobby OR hobbies OR "free time" OR Recreation                                                                                                                                                                                                                                                                                                                                                             | Search modes - Find all my search terms | 37,212    |
| S9  | TI (in-door OR out-door OR indoor OR outdoor OR garden* OR horticultur* OR play* OR game OR games OR gaming OR creativ* OR painting OR drawing OR reading OR voluntary OR volunteer* OR extracurricular) OR SU (in-door OR out-door OR indoor OR outdoor OR garden* OR horticultur* OR play* OR game OR games OR gaming OR creativ* OR painting OR drawing OR reading OR voluntary OR volunteer* OR extracurricular) | Search modes - Find all my search terms | 175,457   |
| S10 | S7 OR S8 OR S9                                                                                                                                                                                                                                                                                                                                                                                                       | Search modes - Find all my search terms | 207,264   |
| S11 | S6 AND S10                                                                                                                                                                                                                                                                                                                                                                                                           | Search modes - Find all my search terms | 5,662     |
| S12 | (ZG "adolescence (13-17 yrs)" or ZG "adulthood (18 yrs & older)" or ZG "childhood (birth-12 yrs)") not (ZG "aged (65 yrs & older)" or ZG "middle age (40-64 yrs)")                                                                                                                                                                                                                                                   | Search modes - Find all my search terms | 1,627,211 |
| S13 | S11 NOT S12                                                                                                                                                                                                                                                                                                                                                                                                          | Search modes - Find all my search terms | 3,357     |
| S14 | (DE "Animals") OR TI (rat OR rats OR mouse OR mice OR dog OR dogs) OR SU (rat OR rats OR mouse OR mice OR dog OR dogs)                                                                                                                                                                                                                                                                                               | Search modes - Find all my search terms | 311,593   |
| S15 | S13 NOT S14                                                                                                                                                                                                                                                                                                                                                                                                          | Search modes - Find all my search terms | 3,212     |

|    |     |                                                                                                                                    |                                            |
|----|-----|------------------------------------------------------------------------------------------------------------------------------------|--------------------------------------------|
| 1  |     |                                                                                                                                    |                                            |
| 2  |     |                                                                                                                                    |                                            |
| 3  | S16 | (DE "Drug Therapy")                                                                                                                | Search modes - Find<br>all my search terms |
| 4  |     |                                                                                                                                    | 127,11                                     |
| 5  | S17 | S15 NOT S16                                                                                                                        | Search modes - Find<br>all my search terms |
| 6  |     |                                                                                                                                    | 3,161                                      |
| 7  | S18 | DE "Meta Analysis"                                                                                                                 | Search modes - Find<br>all my search terms |
| 8  |     |                                                                                                                                    | 4,026                                      |
| 9  | S19 | meta-analys* OR meta analys* OR metaanalys* OR<br>meta synth* OR meta-synth* OR metasynt*                                          | Search modes -<br>Boolean/Phrase           |
| 10 |     |                                                                                                                                    | 27,695                                     |
| 11 | S20 | (systematic* OR quantitativ* OR methodologic*)<br>N4 (review* OR overview* OR synthes*)                                            | Search modes - Find<br>all my search terms |
| 12 |     |                                                                                                                                    | 27,454                                     |
| 13 | S21 | TI (systematic OR structured OR evidence OR trials)<br>AND TI (review OR overview OR look OR<br>examination OR update* OR summary) | Search modes - Find<br>all my search terms |
| 14 |     |                                                                                                                                    | 16,949                                     |
| 15 | S22 | S18 OR S19 OR S20 OR S21                                                                                                           | Search modes - Find<br>all my search terms |
| 16 |     |                                                                                                                                    | 51,681                                     |
| 17 | S23 | S17 AND S22                                                                                                                        | Search modes - Find<br>all my search terms |
| 18 |     |                                                                                                                                    | 73                                         |
| 19 |     |                                                                                                                                    |                                            |
| 20 |     |                                                                                                                                    |                                            |
| 21 |     |                                                                                                                                    |                                            |
| 22 |     |                                                                                                                                    |                                            |
| 23 |     |                                                                                                                                    |                                            |
| 24 |     |                                                                                                                                    |                                            |
| 25 |     |                                                                                                                                    |                                            |
| 26 |     |                                                                                                                                    |                                            |
| 27 |     |                                                                                                                                    |                                            |
| 28 |     |                                                                                                                                    |                                            |
| 29 |     |                                                                                                                                    |                                            |
| 30 |     |                                                                                                                                    |                                            |
| 31 |     |                                                                                                                                    |                                            |
| 32 |     |                                                                                                                                    |                                            |
| 33 |     |                                                                                                                                    |                                            |
| 34 |     |                                                                                                                                    |                                            |
| 35 |     |                                                                                                                                    |                                            |
| 36 |     |                                                                                                                                    |                                            |
| 37 |     |                                                                                                                                    |                                            |
| 38 |     |                                                                                                                                    |                                            |
| 39 |     |                                                                                                                                    |                                            |
| 40 |     |                                                                                                                                    |                                            |
| 41 |     |                                                                                                                                    |                                            |
| 42 |     |                                                                                                                                    |                                            |
| 43 |     |                                                                                                                                    |                                            |
| 44 |     |                                                                                                                                    |                                            |
| 45 |     |                                                                                                                                    |                                            |
| 46 |     |                                                                                                                                    |                                            |
| 47 |     |                                                                                                                                    |                                            |
| 48 |     |                                                                                                                                    |                                            |
| 49 |     |                                                                                                                                    |                                            |
| 50 |     |                                                                                                                                    |                                            |
| 51 |     |                                                                                                                                    |                                            |
| 52 |     |                                                                                                                                    |                                            |
| 53 |     |                                                                                                                                    |                                            |
| 54 |     |                                                                                                                                    |                                            |
| 55 |     |                                                                                                                                    |                                            |
| 56 |     |                                                                                                                                    |                                            |
| 57 |     |                                                                                                                                    |                                            |
| 58 |     |                                                                                                                                    |                                            |
| 59 |     |                                                                                                                                    |                                            |
| 60 |     |                                                                                                                                    |                                            |

1  
2  
3  
4  
5  
6  
7  
8  
9  
10  
11  
12  
13  
14  
15  
16  
17  
18  
19  
20  
21  
22  
23  
24  
25  
26  
27  
28  
29  
30  
31  
32  
33  
34  
35  
36  
37  
38  
39  
40  
41  
42  
43  
44  
45  
46  
47  
48  
49  
50  
51  
52  
53  
54  
55  
56  
57  
58  
59  
60

### PsycINFO (Ebsco): 5 April 2018

| #   | Query                                                                                                                                                                                                                                                                                                                                                                                                                                                                      | Limiters/Expanders                      | Results   |
|-----|----------------------------------------------------------------------------------------------------------------------------------------------------------------------------------------------------------------------------------------------------------------------------------------------------------------------------------------------------------------------------------------------------------------------------------------------------------------------------|-----------------------------------------|-----------|
| S1  | DE "Alzheimer's Disease"                                                                                                                                                                                                                                                                                                                                                                                                                                                   | Search modes - Find all my search terms | 41,959    |
| S2  | DE "Senile Dementia" OR DE "Cognitive Impairment"                                                                                                                                                                                                                                                                                                                                                                                                                          | Search modes - Find all my search terms | 33,077    |
| S3  | DE "Cognitive Reserve"                                                                                                                                                                                                                                                                                                                                                                                                                                                     | Search modes - Find all my search terms | 353       |
| S4  | dementia OR alzheimer*                                                                                                                                                                                                                                                                                                                                                                                                                                                     | Search modes - Find all my search terms | 98,945    |
| S5  | ((cognit* OR memory OR mental) N3 (impair* OR decline* OR deficit* OR reduc* OR function*))                                                                                                                                                                                                                                                                                                                                                                                | Search modes - Find all my search terms | 146,379   |
| S6  | S1 OR S2 OR S3 OR S4 OR S5                                                                                                                                                                                                                                                                                                                                                                                                                                                 | Search modes - Find all my search terms | 210,573   |
| S7  | (((((DE "Leisure Time") OR (DE "Hobbies")) AND (DE "Recreation" OR DE "Clubs (Social Organizations)" OR DE "Traveling" OR DE "Vacationing"))) OR (DE "Gambling"))) AND (DE "Games" OR DE "Chess" OR DE "Computer Games"))                                                                                                                                                                                                                                                  | Search modes - Find all my search terms | 358       |
| S8  | leisure OR hobby OR hobbies OR "free time" OR Recreation                                                                                                                                                                                                                                                                                                                                                                                                                   | Search modes - Find all my search terms | 39,017    |
| S9  | TI (in-door OR out-door OR indoor OR outdoor OR garden* OR horticultur* OR play* OR game OR games OR gaming OR creativ* OR painting OR drawing OR reading OR voluntary OR volunteer* OR extracurricular OR (cognitiv* W1 activit*)) OR SU (in-door OR out-door OR indoor OR outdoor OR garden* OR horticultur* OR play* OR game OR games OR gaming OR creativ* OR painting OR drawing OR reading OR voluntary OR volunteer* OR extracurricular OR (cognitiv* W1 activit*)) | Search modes - Find all my search terms | 182,299   |
| S10 | S7 OR S8 OR S9                                                                                                                                                                                                                                                                                                                                                                                                                                                             | Search modes - Find all my search terms | 215,667   |
| S11 | S6 AND S10                                                                                                                                                                                                                                                                                                                                                                                                                                                                 | Search modes - Find all my search terms | 6,166     |
| S12 | (ZG "adolescence (13-17 yrs)" or ZG "adulthood (18 yrs & older)" or ZG "childhood (birth-12 yrs)") not (ZG "aged (65 yrs & older)" or ZG "middle age (40-64 yrs)")                                                                                                                                                                                                                                                                                                         | Search modes - Find all my search terms | 1,695,146 |

|    |     |                                                                                                                              |                                         |
|----|-----|------------------------------------------------------------------------------------------------------------------------------|-----------------------------------------|
| 1  |     |                                                                                                                              |                                         |
| 2  |     |                                                                                                                              |                                         |
| 3  | S13 | S11 NOT S12                                                                                                                  | Search modes - Find all my search terms |
| 4  |     |                                                                                                                              | 3,706                                   |
| 5  | S14 | (DE "Animals") OR TI (rat OR rats OR mouse OR mice OR dog OR dogs) OR SU (rat OR rats OR mouse OR mice OR dog OR dogs)       | Search modes - Find all my search terms |
| 6  |     |                                                                                                                              | 318,343                                 |
| 7  | S15 | S13 NOT S14                                                                                                                  | Search modes - Find all my search terms |
| 8  |     |                                                                                                                              | 3,539                                   |
| 9  | S16 | (DE "Drug Therapy")                                                                                                          | Search modes - Find all my search terms |
| 10 |     |                                                                                                                              | 129,812                                 |
| 11 | S17 | S15 NOT S16                                                                                                                  | Search modes - Find all my search terms |
| 12 |     |                                                                                                                              | 3,481                                   |
| 13 | S18 | DE "Meta Analysis"                                                                                                           | Search modes - Find all my search terms |
| 14 |     |                                                                                                                              | 4,152                                   |
| 15 | S19 | meta-analys* OR meta analys* OR metaanalys* OR meta synth* OR meta-synth* OR metasynth*                                      | Search modes - Boolean/Phrase           |
| 16 |     |                                                                                                                              | 30,127                                  |
| 17 | S20 | (systematic* OR quantitativ* OR methodologic*) N4 (review* OR overview* OR synthes*)                                         | Search modes - Find all my search terms |
| 18 |     |                                                                                                                              | 30,748                                  |
| 19 | S21 | TI (systematic OR structured OR evidence OR trials) AND TI (review OR overview OR look OR examination OR update* OR summary) | Search modes - Find all my search terms |
| 20 |     |                                                                                                                              | 19,166                                  |
| 21 | S22 | S18 OR S19 OR S20 OR S21                                                                                                     | Search modes - Find all my search terms |
| 22 |     |                                                                                                                              | 56,448                                  |
| 23 | S23 | S17 AND S22                                                                                                                  | Search modes - Find all my search terms |
| 24 |     |                                                                                                                              | 84                                      |
| 25 | S24 | RD 201707-                                                                                                                   | Search modes - Find all my search terms |
| 26 |     |                                                                                                                              | 148,956                                 |
| 27 | S25 | DT 201707-                                                                                                                   | Search modes - Find all my search terms |
| 28 |     |                                                                                                                              | 100,982                                 |
| 29 | S26 | S24 OR S25                                                                                                                   | Search modes - Find all my search terms |
| 30 |     |                                                                                                                              | 159,715                                 |
| 31 | S27 | S23 AND S26                                                                                                                  | Search modes - Find all my search terms |
| 32 |     |                                                                                                                              | 13                                      |
| 33 |     |                                                                                                                              |                                         |
| 34 |     |                                                                                                                              |                                         |
| 35 |     |                                                                                                                              |                                         |
| 36 |     |                                                                                                                              |                                         |
| 37 |     |                                                                                                                              |                                         |
| 38 |     |                                                                                                                              |                                         |
| 39 |     |                                                                                                                              |                                         |
| 40 |     |                                                                                                                              |                                         |
| 41 |     |                                                                                                                              |                                         |
| 42 |     |                                                                                                                              |                                         |
| 43 |     |                                                                                                                              |                                         |
| 44 |     |                                                                                                                              |                                         |
| 45 |     |                                                                                                                              |                                         |
| 46 |     |                                                                                                                              |                                         |
| 47 |     |                                                                                                                              |                                         |
| 48 |     |                                                                                                                              |                                         |
| 49 |     |                                                                                                                              |                                         |
| 50 |     |                                                                                                                              |                                         |
| 51 |     |                                                                                                                              |                                         |
| 52 |     |                                                                                                                              |                                         |
| 53 |     |                                                                                                                              |                                         |
| 54 |     |                                                                                                                              |                                         |
| 55 |     |                                                                                                                              |                                         |
| 56 |     |                                                                                                                              |                                         |
| 57 |     |                                                                                                                              |                                         |
| 58 |     |                                                                                                                              |                                         |
| 59 |     |                                                                                                                              |                                         |
| 60 |     |                                                                                                                              |                                         |

### Epistemonikos 18. Juli 2017

| Search                                                                                                                                                                                                                                                                                                                | Results |
|-----------------------------------------------------------------------------------------------------------------------------------------------------------------------------------------------------------------------------------------------------------------------------------------------------------------------|---------|
| (dementia OR alzheimer* OR cognitiv*) AND (leisure OR recreation OR "free time" OR hobby OR hobbies OR (title:(in-door OR out-door OR indoor OR outdoor OR garden* OR horticultur* OR play* OR game OR games OR gaming OR creativ* OR painting OR drawing OR reading OR voluntary OR volunteer* OR extracurricular))) | 273     |
| Filter: Systematic Review                                                                                                                                                                                                                                                                                             | 64      |

### Epistemonikos 18. Juli 2017

| Search                                                                                                                                                                                                                                                                                                                | Results |
|-----------------------------------------------------------------------------------------------------------------------------------------------------------------------------------------------------------------------------------------------------------------------------------------------------------------------|---------|
| (dementia OR alzheimer* OR cognitiv*) AND (leisure OR recreation OR "free time" OR hobby OR hobbies OR (title:(in-door OR out-door OR indoor OR outdoor OR garden* OR horticultur* OR play* OR game OR games OR gaming OR creativ* OR painting OR drawing OR reading OR voluntary OR volunteer* OR extracurricular))) | 368     |
| Filter: Systematic Review                                                                                                                                                                                                                                                                                             | 146     |
| Added to database: 01-07-17 to 05-04-18                                                                                                                                                                                                                                                                               | 25      |

**Cochrane Library: 18. Juli 2017**

| ID  | Search                                                                                                                  | Hits   |
|-----|-------------------------------------------------------------------------------------------------------------------------|--------|
| #1  | [mh ^Dementia] or [mh "Alzheimer Disease"]                                                                              | 4053   |
| #2  | [mh ^"Cognitive Dysfunction"]                                                                                           | 181    |
| #3  | [mh ^Cognition]                                                                                                         | 6276   |
| #4  | (dementia or alzheimer*):ti,ab,kw                                                                                       | 11879  |
| #5  | ((cognit* or memory or mental) next (impair* or decline* or deficit* or reduc* or function*)):ti,ab,kw                  | 12722  |
| #6  | {or #1-#5}                                                                                                              | 25014  |
| #7  | [mh "Leisure Activities"]                                                                                               | 15395  |
| #8  | leisure:ti,ab,kw                                                                                                        | 1481   |
| #9  | (hobby or hobbies):ti,ab,kw                                                                                             | 55     |
| #10 | "free time":ti,ab,kw                                                                                                    | 162    |
| #11 | Recreation:ti,ab,kw                                                                                                     | 615    |
| #12 | (in-door or out-door or indoor or outdoor):ti,kw                                                                        | 478    |
| #13 | (garden* or horticultur*):ti,kw                                                                                         | 106    |
| #14 | (play* or game* or gaming):ti,kw                                                                                        | 3280   |
| #15 | (creativ* or painting or drawing or reading):ti,kw                                                                      | 2913   |
| #16 | (voluntary or volunteer* or extracurricular):ti,kw                                                                      | 17942  |
| #17 | {or #7-#16}                                                                                                             | 39978  |
| #18 | #6 and #17                                                                                                              | 1551   |
| #19 | [mh "age groups"] not ([mh aged] or [mh "middle aged"])                                                                 | 104634 |
| #20 | #18 not #19 in Cochrane Reviews (Reviews and Protocols), Other Reviews, Technology Assessments and Economic Evaluations | 38     |

**Cochrane Library: 5. April 2018**

| ID  | Search                                                                                                 | Hits  |
|-----|--------------------------------------------------------------------------------------------------------|-------|
| #1  | [mh ^Dementia] or [mh "Alzheimer Disease"]                                                             | 4263  |
| #2  | [mh ^"Cognitive Dysfunction"]                                                                          | 450   |
| #3  | [mh ^Cognition]                                                                                        | 6675  |
| #4  | [mh ^"Cognitive Reserve"]                                                                              | 8     |
| #5  | (dementia or alzheimer*):ti,ab,kw                                                                      | 13099 |
| #6  | ((cognit* or memory or mental) next (impair* or decline* or deficit* or reduc* or function*)):ti,ab,kw | 14315 |
| #7  | {or #1-#6}                                                                                             | 27581 |
| #8  | [mh "Leisure Activities"]                                                                              | 16504 |
| #9  | leisure:ti,ab,kw                                                                                       | 1683  |
| #10 | (hobby or hobbies):ti,ab,kw                                                                            | 59    |
| #11 | free time:ti,ab,kw                                                                                     | 169   |
| #12 | Recreation:ti,ab,kw                                                                                    | 674   |
| #13 | (in-door or out-door or indoor or outdoor):ti,kw                                                       | 541   |

|    |                                                                         |        |
|----|-------------------------------------------------------------------------|--------|
| 1  |                                                                         |        |
| 2  |                                                                         |        |
| 3  | #14 (garden* or horticultur*):ti,kw                                     | 125    |
| 4  | #15 (play* or game* or gaming):ti,kw                                    | 3653   |
| 5  | #16 (creativ* or painting or drawing or reading):ti,kw                  | 3482   |
| 6  | #17 (voluntary or volunteer* or extracurricular):ti,kw                  | 20037  |
| 7  | #18 (cognitiv* near/2 (activity or activities)):ti,kw                   | 80     |
| 8  | #19 {or #8-#18}                                                         | 44252  |
| 9  | #20 #7 and #19                                                          | 1838   |
| 10 | #21 [mh "age groups"] not ([mh aged] or [mh "middle aged"])             | 109483 |
| 11 | #22 #20 not #21 Publication Year from 2017 to 2018, in Cochrane Reviews | 1      |
| 12 | (Reviews and Protocols) and Technology Assessments                      |        |
| 13 |                                                                         |        |
| 14 |                                                                         |        |
| 15 |                                                                         |        |
| 16 |                                                                         |        |
| 17 |                                                                         |        |
| 18 |                                                                         |        |
| 19 |                                                                         |        |
| 20 |                                                                         |        |
| 21 |                                                                         |        |
| 22 |                                                                         |        |
| 23 |                                                                         |        |
| 24 |                                                                         |        |
| 25 |                                                                         |        |
| 26 |                                                                         |        |
| 27 |                                                                         |        |
| 28 |                                                                         |        |
| 29 |                                                                         |        |
| 30 |                                                                         |        |
| 31 |                                                                         |        |
| 32 |                                                                         |        |
| 33 |                                                                         |        |
| 34 |                                                                         |        |
| 35 |                                                                         |        |
| 36 |                                                                         |        |
| 37 |                                                                         |        |
| 38 |                                                                         |        |
| 39 |                                                                         |        |
| 40 |                                                                         |        |
| 41 |                                                                         |        |
| 42 |                                                                         |        |
| 43 |                                                                         |        |
| 44 |                                                                         |        |
| 45 |                                                                         |        |
| 46 |                                                                         |        |
| 47 |                                                                         |        |
| 48 |                                                                         |        |
| 49 |                                                                         |        |
| 50 |                                                                         |        |
| 51 |                                                                         |        |
| 52 |                                                                         |        |
| 53 |                                                                         |        |
| 54 |                                                                         |        |
| 55 |                                                                         |        |
| 56 |                                                                         |        |
| 57 |                                                                         |        |
| 58 |                                                                         |        |
| 59 |                                                                         |        |
| 60 |                                                                         |        |



1  
2  
3  
4  
5  
6  
7  
8  
9  
10  
11  
12  
13  
14  
15  
16  
17  
18  
19  
20  
21  
22  
23  
24  
25  
26  
27  
28  
29  
30  
31  
32  
33  
34  
35  
36  
37  
38  
39  
40  
41  
42  
43  
44  
45  
46

Supplementary file 5: Risk of Bias of included studies

Systematic reviews

| Author, Year                         | RISK OF BIAS | Dual Screening and Extraction | Comprehensive literature search | Study quality assessed | 'A priori' design | Grey literature included | List of studies | Study characteristics provided | Scientific quality used appropriately | Appropriate methods to combine findings | Publication bias     | Conflict of interest included | Reason for High Risk of Bias Decision                                                |
|--------------------------------------|--------------|-------------------------------|---------------------------------|------------------------|-------------------|--------------------------|-----------------|--------------------------------|---------------------------------------|-----------------------------------------|----------------------|-------------------------------|--------------------------------------------------------------------------------------|
| Di Marco et al., 2014 <sup>41</sup>  | High         | NR                            | Yes                             | No                     | Yes               | No                       | No              | No                             | NA                                    | Yes                                     | No                   | No                            | No information on screening methods or dual extraction<br>No risk of bias assessment |
| Opdebeeck et al., 2016 <sup>42</sup> | High         | Yes                           | Yes                             | No                     | Yes               | Yes                      | No              | Yes                            | NA                                    | Yes                                     | No                   | No                            | No risk of bias assessment<br>No assessment of Publication bias                      |
| Sajeev et al., 2016 <sup>43</sup>    | Medium       | NR                            | Yes                             | Yes                    | Yes               | No                       | No              | Yes                            | Yes                                   | Yes                                     | No                   | Yes                           | No information on dual screening or dual extraction                                  |
| Toril et al., 2014 <sup>44</sup>     | High         | NR                            | Yes                             | No                     | Yes               | No                       | No              | Yes                            | NA                                    | Yes                                     | Yes                  | No                            | No information on screening methods or dual extraction<br>No risk of bias assessment |
| Yates et al., 2016 <sup>45</sup>     | Medium       | NR                            | Yes                             | Yes                    | Yes               | No                       | No              | Yes                            | Yes                                   | Yes                                     | No (too few studies) | Yes                           | No information on dual screening or dual extraction                                  |

NA = not applicable, NR = not reported

## Supplementary file 6: List of excluded studies during full text screening

## Systematic review:

| Study                       | Title                                                                                                                                                                                                  | Reason for Exclusion        |
|-----------------------------|--------------------------------------------------------------------------------------------------------------------------------------------------------------------------------------------------------|-----------------------------|
| Canadian Nursing Home, 2007 | Studies confirm link between late-life cognitive activities and reduced risk of dementia                                                                                                               | Not retrievable             |
| Adam et al., 2013           | Occupational activity and cognitive reserve: implications in terms of prevention of cognitive aging and Alzheimer's disease                                                                            | Ineligible study design     |
| GM: Midlife & Beyond, 2017  | Study finds education does not protect against cognitive decline in later life                                                                                                                         | Ineligible study design     |
| Dowd et al., 2003           | Can mental and physical activities such as chess and gardening help in the prevention and treatment of Alzheimer's? Healthy aging through stimulation of the mind                                      | Ineligible study design     |
| Beydoun et al., 2014        | Epidemiologic studies of modifiable factors associated with cognition and dementia: systematic review and meta-analysis                                                                                | Ineligible study design     |
| Gilland, 2007               | Continuing education topic 4: dementia                                                                                                                                                                 | Ineligible study design     |
| Nursing Standard, 2010      | Clinical digest. Cognitive stimulation delays dementia but later decline is faster                                                                                                                     | Ineligible publication type |
| Albert et al., 2007         | Changing the trajectory of cognitive decline?                                                                                                                                                          | Ineligible publication type |
| Bak et al., 2016            | Language lessons to help protect against dementia                                                                                                                                                      | Ineligible publication type |
| Bauer et al., 2002          | RN news watch: clinical highlights. Mentally stimulating activities seem to cut Alzheimer's risk                                                                                                       | Ineligible publication type |
| Burgener et al., 2009       | Effectiveness of community-based, nonpharmacological interventions for early-stage dementia: conclusions and recommendations                                                                           | Ineligible publication type |
| Gatz et al., 2005           | Educating the brain to avoid dementia: can mental exercise prevent Alzheimer disease?                                                                                                                  | Ineligible publication type |
| Rosenberg et al., 2017      | Influence of apoe, age, sex, education and baseline cognition on intervention effects on cognition in the finnish geriatric intervention study to prevent cognitive impairment and disability (FINGER) | Ineligible publication type |
| Summers et al., 2013        | The Tasmanian Healthy Brain Project (THBP): a prospective longitudinal examination of the effect of university-level education in older adults in preventing age-related cognitive                     | Ineligible publication type |
| Wahlund et al., 2006        | [Life-long mental exercise can prevent Alzheimer disease]                                                                                                                                              | Ineligible publication type |
| ACTRN126120001 47886, 2012  | The Body, Brain, Life Program "a prevention trial to reduce risk of Alzheimer's Disease                                                                                                                | Ineligible intervention     |
| Anon et al., 2008           | The Study of Mental Activity and Regular Training for the Prevention of Cognitive Decline in at Risk Individuals: The SMART Trial Or The Study of Mental Activity and Regular                          | Ineligible intervention     |
| Brenes et al., 2003         | Cognitive training may improve targeted cognitive functions in older adults                                                                                                                            | Ineligible intervention     |
| Fratiglioni et al., 2007    | Prevention of Alzheimer's disease and dementia. Major findings from the Kungsholmen Project                                                                                                            | Ineligible intervention     |
| Gatz et al., 2006           | Lifestyle risk and delaying factors                                                                                                                                                                    | Ineligible intervention     |
| Hall et al., 2009           | Cognitive activities delay onset of memory decline in persons who develop dementia                                                                                                                     | Ineligible intervention     |
| Harmanci et al., 2003       | Risk factors for Alzheimer disease: a population-based case-control study in Istanbul, Turkey                                                                                                          | Ineligible intervention     |
| Harmanci et al., 2003       | Risk factors for Alzheimer disease: a population-based case-control study in Istanbul, Turkey                                                                                                          | Ineligible intervention     |
| Kwok et al., 2011           | Effectiveness of coordination exercise in improving cognitive function in older adults: a prospective study                                                                                            | Ineligible intervention     |
| Le Carret et al., 2003      | The effect of education on cognitive performances and its implication for the constitution of the cognitive reserve                                                                                    | Ineligible intervention     |
| Merom et al., 2016          | Cognitive benefits of social dancing and walking in old age: The dancing mind randomized controlled trial                                                                                              | Ineligible intervention     |
| Roberts et al., 2015        | Risk and protective factors for cognitive impairment in persons aged 85 years and older                                                                                                                | Ineligible intervention     |
| Sandro et al., 2008         | Risk-reducing effect of education in Alzheimer's disease                                                                                                                                               | Ineligible intervention     |
| Sattler et al., 2012        | Cognitive activity, education and socioeconomic status as preventive factors for mild cognitive impairment and Alzheimer's disease                                                                     | Ineligible intervention     |
| Schultz et al., 2015        | Participation in cognitively-stimulating activities is associated with brain structure and cognitive function in preclinical Alzheimer's disease                                                       | Ineligible intervention     |
| Soubelet et al., 2011       | Engaging in cultural activities compensates for educational differences in cognitive abilities                                                                                                         | Ineligible intervention     |

|    |                                                                   |                                                                                                                                                                                  |                                       |
|----|-------------------------------------------------------------------|----------------------------------------------------------------------------------------------------------------------------------------------------------------------------------|---------------------------------------|
| 1  |                                                                   |                                                                                                                                                                                  |                                       |
| 2  |                                                                   |                                                                                                                                                                                  |                                       |
| 3  |                                                                   |                                                                                                                                                                                  |                                       |
| 4  | Stanford University, 2012                                         | Activities for Cognitive Enhancement of Seniors                                                                                                                                  | Ineligible intervention               |
| 5  | Then et al., 2016                                                 | Education as protector against dementia, but what exactly do we mean by education?                                                                                               | Ineligible intervention               |
| 6  |                                                                   |                                                                                                                                                                                  |                                       |
| 7  | University Hospital 2016                                          | Long-term Effects of Interventional Strategies to Prevent Cognitive Decline in Elderly                                                                                           | Ineligible intervention               |
| 8  | VanDijk et al., 2008                                              | No protective effects of education during normal cognitive aging: results from the 6-year follow-up of the Maastricht Aging Study                                                | Ineligible intervention               |
| 9  |                                                                   |                                                                                                                                                                                  |                                       |
| 10 | Vemuri et al., 2014                                               | Association of lifetime intellectual enrichment with cognitive decline in the older population                                                                                   | Ineligible intervention               |
| 11 |                                                                   |                                                                                                                                                                                  |                                       |
| 12 | Wang et al., 2002                                                 | Late-life engagement in social and leisure activities is associated with a decreased risk of dementia: a longitudinal study from the Kungsholmen project                         | Ineligible intervention               |
| 13 |                                                                   |                                                                                                                                                                                  |                                       |
| 14 | Yaffe et al., 2009                                                | Predictors of maintaining cognitive function in older adults: the Health ABC study                                                                                               | Ineligible intervention               |
| 15 |                                                                   |                                                                                                                                                                                  |                                       |
| 16 | Kliegel et al., 2004                                              | Life-long intellectual activities mediate the predictive effect of early education on cognitive impairment in centenarians: A retrospective study                                | Ineligible populations                |
| 17 |                                                                   |                                                                                                                                                                                  |                                       |
| 18 | Jonaitis et al., 2013                                             | Cognitive activities and cognitive performance in middle-aged adults at risk for Alzheimer's disease                                                                             | Ineligible populations                |
| 19 | Friedland et al., 2001                                            | Patients with Alzheimer's disease have reduced activities in midlife compared with healthy control-group members                                                                 | No information about the intervention |
| 20 | National University,                                              | Choral Singing For the Prevention of Dementia                                                                                                                                    | not finished study                    |
| 21 |                                                                   |                                                                                                                                                                                  |                                       |
| 22 | Marquez et al., 2017                                              | Regular Latin Dancing and Health Education may Improve Cognition of Late Middle-Aged and Older Latinos                                                                           | Ineligible comparison;                |
| 23 | University Hospital 2018                                          | Prospective Population Based Cohort Study on Cognitive and Cardiovascular Aging (MonaLisaPredor)                                                                                 | not finished study;                   |
| 24 |                                                                   |                                                                                                                                                                                  |                                       |
| 25 | Janssen Research Development 2018                                 | Cognitive Health in Ageing Register: Investigational, Observational and Trial Studies in Dementia Research: Prospective Readiness Cohort Study                                   | not finished study                    |
| 26 | ACTRN126170008 58392 2017                                         | Ageing and Folk Dances from the Basque Country: Functional and neuropsychological changes. A controlled trial.                                                                   | Ineligible intervention               |
| 27 | Biasutti et al., 2018                                             | Assessing a cognitive music training for older participants: a randomised controlled trial                                                                                       | Ineligible population                 |
| 28 |                                                                   |                                                                                                                                                                                  |                                       |
| 29 | Centre de Recherche del'Institut Universitaire de Geriatrie, 2018 | Impact of a Cognitive Intervention Enriched With Leisure Activities in Persons With Subjective Cognitive Decline                                                                 | Not finished study                    |
| 30 |                                                                   |                                                                                                                                                                                  |                                       |
| 31 | Chan et al., 2016                                                 | Training Older Adults to Use Tablet Computers: Does It Enhance Cognitive Function?                                                                                               | Ineligible study design               |
| 32 |                                                                   |                                                                                                                                                                                  |                                       |
| 33 | Ihle et al., 2017                                                 | The relation of education and cognitive activity to mini-mental state in old age: The role of functional fitness status                                                          | Ineligible intervention               |
| 34 |                                                                   |                                                                                                                                                                                  |                                       |
| 35 | Krell-Roesch et al., 2017                                         | Association Between Mentally Stimulating Activities in Late Life and the Outcome of Incident Mild Cognitive Impairment, With an Analysis of the APOE epsilon4 Genotype           | Ineligible intervention               |
| 36 | NCT02919748, 2016                                                 | Choral Singing For the Prevention of Dementia                                                                                                                                    | Not finished study                    |
| 37 |                                                                   |                                                                                                                                                                                  |                                       |
| 38 | Ramos et al., 2017                                                | Does learning a language in the elderly enhance switching ability?                                                                                                               | Ineligible outcome                    |
| 39 |                                                                   |                                                                                                                                                                                  |                                       |
| 40 | Wang et al., 2017                                                 | Association of lifelong exposure to cognitive reserve-enhancing factors with dementia risk: A community-based cohort study                                                       | Ineligible intervention               |
| 41 | ZanESCO et al., 2018                                              | Mental training of attention through intensive meditation: Longitudinal behavioral and electrophysiological investigations of visual sustained attention and response inhibition | Not retrievable                       |
| 42 | Zhu et al., 2017                                                  | Leisure activities, education, and cognitive impairment in Chinese older adults: A population-based longitudinal study                                                           | Ineligible intervention               |
| 43 |                                                                   |                                                                                                                                                                                  |                                       |
| 44 | 2017                                                              | Study suggests late-life activities reduce the risk of mild cognitive impairment                                                                                                 | Ineligible study design               |
| 45 |                                                                   |                                                                                                                                                                                  |                                       |
| 46 |                                                                   |                                                                                                                                                                                  |                                       |
| 47 |                                                                   |                                                                                                                                                                                  |                                       |
| 48 |                                                                   |                                                                                                                                                                                  |                                       |
| 49 |                                                                   |                                                                                                                                                                                  |                                       |
| 50 |                                                                   |                                                                                                                                                                                  |                                       |
| 51 |                                                                   |                                                                                                                                                                                  |                                       |
| 52 |                                                                   |                                                                                                                                                                                  |                                       |
| 53 |                                                                   |                                                                                                                                                                                  |                                       |
| 54 |                                                                   |                                                                                                                                                                                  |                                       |
| 55 |                                                                   |                                                                                                                                                                                  |                                       |
| 56 |                                                                   |                                                                                                                                                                                  |                                       |
| 57 |                                                                   |                                                                                                                                                                                  |                                       |
| 58 |                                                                   |                                                                                                                                                                                  |                                       |
| 59 |                                                                   |                                                                                                                                                                                  |                                       |
| 60 |                                                                   |                                                                                                                                                                                  |                                       |

## Overview of Systematic Reviews

| Study                    | Title                                                                                                                                    | Reason for Exclusion                                          |
|--------------------------|------------------------------------------------------------------------------------------------------------------------------------------|---------------------------------------------------------------|
| Bernhardt et al., 2002   | [The effect of psychosocial factors on risk of dementia]                                                                                 | Ineligible intervention                                       |
| Bleakley et al., 2015    | Gaming for health: a systematic review of the physical and cognitive effects of interactive computer games in older adults               | Ineligible intervention                                       |
| Conti et al., 2009       | The potential role of leisure in the prevention of dementia                                                                              | Not retrievable                                               |
| Fratiglioni et al., 2004 | An active and socially integrated lifestyle in late life might protect against dementia                                                  | Ineligible study design                                       |
| Karkou et al., 2017      | Dance movement therapy for dementia                                                                                                      | Ineligible population                                         |
| Lee et al., 2019         | Systematic review of health behavioral risks and cognitive health in older adults                                                        | Ineligible intervention                                       |
| Liapis et al., 2017      | Meaningful use of computers has a potential therapeutic and preventative role in dementia care: A systematic review                      | Ineligible intervention                                       |
| Munn et al., 2010        | Review summaries: evidence for nursing practice. Cognitive leisure activities and their role in preventing dementia: a systematic review | Ineligible publication type                                   |
| Opdebeeck et al., 2014   | Cognitive reserve and cognitive function: A meta-analysis                                                                                | Ineligible publication type                                   |
| Stephen et al., 2017     | Physical Activity and Alzheimer's Disease: A Systematic Review                                                                           | Ineligible intervention                                       |
| Stern et al., 2010       | Cognitive leisure activities and their role in preventing dementia: a systematic review                                                  | Study superseded by more recent study                         |
| Stern et al., 2009       | Cognitive leisure activities and their role in preventing dementia: a systematic review                                                  | Ineligible publication type                                   |
| Wang et al., 2012        | Leisure activities, cognition and dementia                                                                                               | Study superseded by more recent study                         |
| Wayne et al., 2014       | Effect of tai chi on cognitive performance in older adults: systematic review and meta-analysis                                          | Ineligible intervention                                       |
| Zheng et al., 2015       | Tai Chi and the Protection of Cognitive Ability: A Systematic Review of Prospective Studies in Healthy Adults                            | Ineligible intervention                                       |
| Fallahpour et al., 2016  | Leisure-activity participation to prevent later-life cognitive decline: a systematic review                                              | Study superseded by more recent study (search only till 2011) |
| Bediou et al., 2018      | Meta-Analysis of Action Video Game Impact on Perceptual, Attentional, and Cognitive Skills                                               | Ineligible population                                         |
| Howes et al., 2017       | Gaming for Health: Systematic Review and Meta-analysis of the Physical and Cognitive Effects of Active Computer Gaming in Older Adults   | Ineligible intervention                                       |
| Klimova et al., 2017     | Cognitive decline in normal aging and its prevention: a review on non-pharmacological lifestyle strategies                               | Ineligible intervention                                       |
| Schneider et al., 2018   | Potential Cognitive Benefits From Playing Music Among Cognitively Intact Older Adults: A Scoping Review                                  | Ineligible study design                                       |
| Solloway et al., 2016    | An evidence map of the effect of Tai Chi on health outcomes                                                                              | Ineligible study design                                       |
| Wouters et al., 2013     | A meta-analysis of the cognitive and motivational effects of serious games                                                               | Ineligible study design                                       |
| Zhang et al., 2016       | Physical and Cognitive Impacts of Digital Games on Older Adults: A Meta-Analytic Review                                                  | Ineligible intervention                                       |

**GRADE of Recommendations:**

**Cognitive leisure activities compared to no cognitive leisure activities for the prevention of dementia (OPDEBEEK et al.)**

**Patient or population:** over 60 years, non-demented adults at baseline

**Intervention:** cognitive leisure activities

**Comparison:** no cognitive leisure activities

| Outcomes                      | Anticipated absolute effects* (95% CI)          |                                                                                                                  | Relative effect (95% CI) | No of participants (studies) | Certainty of the evidence (GRADE) | Comments |
|-------------------------------|-------------------------------------------------|------------------------------------------------------------------------------------------------------------------|--------------------------|------------------------------|-----------------------------------|----------|
|                               | Risk with no cognitive leisure activities       | Risk with cognitive leisure activities                                                                           |                          |                              |                                   |          |
| Overall cognitive functioning | The mean overall cognitive functioning was 0 SD | The mean overall cognitive functioning in the intervention group was 0,26 SD higher (0,21 higher to 0,31 higher) | -                        | (31 observational studies)   | ⊕○○○<br>VERY LOW <sup>a,b</sup>   |          |

\*The risk in the intervention group (and its 95% confidence interval) is based on the assumed risk in the comparison group and the relative effect of the intervention (and its 95% CI).

CI: Confidence interval; MD: Mean difference

**GRADE Working Group grades of evidence**

**High certainty:** We are very confident that the true effect lies close to that of the estimate of the effect

**Moderate certainty:** We are moderately confident in the effect estimate: The true effect is likely to be close to the estimate of the effect, but there is a possibility that it is substantially different

**Low certainty:** Our confidence in the effect estimate is limited: The true effect may be substantially different from the estimate of the effect

**Very low certainty:** We have very little confidence in the effect estimate: The true effect is likely to be substantially different from the estimate of effect

**Explanations**

a. I<sup>2</sup> = 94%, b. Interventions vary between studies

**Video Games compared to no Video Games for the prevention of dementia (TORIL et al.)**

**Patient or population:** 50-86 years, healthy older adults

**Intervention:** Video Games

**Comparison:** no Video Games

| Outcomes           | Anticipated absolute effects* (95% CI) |                       | Relative effect (95% CI) | No of participants (studies)      | Certainty of the evidence (GRADE) | Comments |
|--------------------|----------------------------------------|-----------------------|--------------------------|-----------------------------------|-----------------------------------|----------|
|                    | Risk with no Video Games               | Risk with Video Games |                          |                                   |                                   |          |
| Cognitive Function | -                                      | -                     | -                        | 913<br>(20 observational studies) | ⊕○○○<br>VERY LOW <sup>a</sup>     |          |

\*The risk in the intervention group (and its 95% confidence interval) is based on the assumed risk in the comparison group and the relative effect of the intervention (and its 95% CI).

CI: Confidence interval; SMD: Standardised mean difference

**GRADE Working Group grades of evidence**

**High certainty:** We are very confident that the true effect lies close to that of the estimate of the effect

**Moderate certainty:** We are moderately confident in the effect estimate: The true effect is likely to be close to the estimate of the effect, but there is a possibility that it is substantially different

**Low certainty:** Our confidence in the effect estimate is limited: The true effect may be substantially different from the estimate of the effect

**Very low certainty:** We have very little confidence in the effect estimate: The true effect is likely to be substantially different from the estimate of effect

**Explanations**

a. Mixing various different interventions and study designs

1  
2  
3  
4  
5  
6  
7  
8  
9  
10  
11  
12  
13  
14  
15  
16  
17  
18  
19  
20  
21  
22  
23  
24  
25  
26  
27  
28  
29  
30  
31  
32  
33  
34  
35  
36  
37  
38  
39  
40  
41  
42  
43  
44  
45  
46

**Cognitive leisure activities compared to no cognitive leisure activities for healthy older adults (YATES et al.)**

**Patient or population:** over 46 years, healthy older adults, **Intervention:** cognitive leisure activities, **Comparison:** no cognitive leisure activities

| Outcomes                          | Anticipated absolute effects* (95% CI)    |                                        | Relative effect (95% CI)  | No of participants (studies)                 | Certainty of the evidence (GRADE) | Comments |
|-----------------------------------|-------------------------------------------|----------------------------------------|---------------------------|----------------------------------------------|-----------------------------------|----------|
|                                   | Risk with no cognitive leisure activities | Risk with cognitive leisure activities |                           |                                              |                                   |          |
| Incidence of AD                   | 0 per 1.000                               | 0 per 1.000 (0 to 0)                   | RR 0.610 (0.418 to 0.900) | (3 observational studies)                    | ⊕○○○<br>VERY LOW <sup>a,b</sup>   |          |
| Incidence of AD                   | 0 per 1.000                               | NaN per 1.000 (NaN to NaN)             | HR 0.584 (0.462 to 0.739) | (2 observational studies)                    | ⊕○○○<br>VERY LOW <sup>b</sup>     |          |
| Incidence of AD                   | Low                                       |                                        | OR 0.775 (0.668 to 0.899) | 0 cases 0 controls (2 observational studies) | ⊕○○○<br>VERY LOW <sup>b,c</sup>   |          |
|                                   | 0 per 1.000                               | 0 per 1.000 (0 to 0)                   |                           |                                              |                                   |          |
| Incidence of cognitive impairment | 0 per 1.000                               | 0 per 1.000 (0 to 0)                   | OR 0.685 (0.550 to 0.845) | (5 observational studies)                    | ⊕○○○<br>VERY LOW <sup>b</sup>     |          |
| Incidence of cognitive impairment | 0 per 1.000                               | NaN per 1.000 (NaN to NaN)             | HR 0.853 (0.711 to 1.022) | (3 observational studies)                    | ⊕○○○<br>VERY LOW <sup>b,c</sup>   |          |

\*The risk in the intervention group (and its 95% confidence interval) is based on the assumed risk in the comparison group and the relative effect of the intervention (and its 95% CI).  
CI: Confidence interval; RR: Risk ratio; HR: Hazard Ratio; OR: Odds ratio

**Explanations**

a. moderate heterogeneity, x<sup>2</sup> test p=0.09, b. differences in interventions (definition of cognitive leisure activities varies across studies), c. high heterogeneity, x<sup>2</sup> test p=0.00, confidence intervals do not overlap

# BMJ Open

## Continuing Education for the Prevention of Mild Cognitive Impairment and Alzheimer's-Type Dementia: A Systematic Review and Overview of Systematic Reviews.

|                                 |                                                                                                                                                                                                                                                                                                                                                                                                                                                                                                                                                                                                                                                                                                                                                                                                                                                                                                                                                                                                                                                                                  |
|---------------------------------|----------------------------------------------------------------------------------------------------------------------------------------------------------------------------------------------------------------------------------------------------------------------------------------------------------------------------------------------------------------------------------------------------------------------------------------------------------------------------------------------------------------------------------------------------------------------------------------------------------------------------------------------------------------------------------------------------------------------------------------------------------------------------------------------------------------------------------------------------------------------------------------------------------------------------------------------------------------------------------------------------------------------------------------------------------------------------------|
| Journal:                        | <i>BMJ Open</i>                                                                                                                                                                                                                                                                                                                                                                                                                                                                                                                                                                                                                                                                                                                                                                                                                                                                                                                                                                                                                                                                  |
| Manuscript ID                   | bmjopen-2018-027719.R1                                                                                                                                                                                                                                                                                                                                                                                                                                                                                                                                                                                                                                                                                                                                                                                                                                                                                                                                                                                                                                                           |
| Article Type:                   | Research                                                                                                                                                                                                                                                                                                                                                                                                                                                                                                                                                                                                                                                                                                                                                                                                                                                                                                                                                                                                                                                                         |
| Date Submitted by the Author:   | 28-Feb-2019                                                                                                                                                                                                                                                                                                                                                                                                                                                                                                                                                                                                                                                                                                                                                                                                                                                                                                                                                                                                                                                                      |
| Complete List of Authors:       | Matyas, Nina; Donau-Universitat Krems, Department for Evidence-based Medicine and Clinical Epidemiology<br>Keser Aschenberger, Filiz; Donau-Universitat Krems, Department for Continuing Education Research and Educational Management<br>Wagner, Gernot; Donau-Universitat Krems, Department for Evidence-based Medicine and Clinical Epidemiology<br>Teufer, Birgit; Donau-Universitat Krems, Department for Evidence-based Medicine and Clinical Epidemiology<br>Auer, Stefanie; Donau-Universitat Krems, Department of Clinical Neurosciences and Preventive Medicine<br>Gisinger, Christoph; Donau-Universitat Krems, Center for Geriatric Medicine and Geriatric Nursing<br>Kil, Monika; Donau-Universitat Krems, Department for Continuing Education Research and Educational Management<br>Klerings, Irma; Donau-Universitat Krems, Department for Evidence-based Medicine and Clinical Epidemiology<br>Gartlehner, Gerald; Donau-Universitat Krems, Department for Evidence-based Medicine and Clinical Epidemiology; RTI International, Evidence-based Practice Center |
| <b>Primary Subject Heading</b>: | Mental health                                                                                                                                                                                                                                                                                                                                                                                                                                                                                                                                                                                                                                                                                                                                                                                                                                                                                                                                                                                                                                                                    |
| Secondary Subject Heading:      | Neurology, Geriatric medicine, Public health                                                                                                                                                                                                                                                                                                                                                                                                                                                                                                                                                                                                                                                                                                                                                                                                                                                                                                                                                                                                                                     |
| Keywords:                       | Systematic review, Dementia < NEUROLOGY, mild cognitive impairment, PREVENTIVE MEDICINE, continuing education                                                                                                                                                                                                                                                                                                                                                                                                                                                                                                                                                                                                                                                                                                                                                                                                                                                                                                                                                                    |
|                                 |                                                                                                                                                                                                                                                                                                                                                                                                                                                                                                                                                                                                                                                                                                                                                                                                                                                                                                                                                                                                                                                                                  |

SCHOLARONE™  
Manuscripts



1  
2 1 **Continuing Education for the Prevention of Mild Cognitive Impairment and**  
3  
4  
5 2 **Alzheimer's-Type Dementia: A Systematic Review and Overview of Systematic**  
6  
7  
8 3 **Reviews.**  
9

10 4 **Nina Matyas**<sup>1</sup>, MD, MSc, Research Associate, Department for Evidence-based Medicine and Clinical  
11  
12  
13 5 Epidemiology, Cochrane Austria, Danube University Krems; nina.matyas@ext.donau-uni.ac.at  
14

15 6 **Filiz Keser Aschenberger**<sup>2</sup>, MA, PhD, Research Associate, Department for Continuing Education  
16  
17 7 Research and Educational Management, Danube University Krems; filiz.keser-aschenberger@donau-  
18  
19 8 uni.ac.at  
20

21 9 **Gernot Wagner**<sup>1</sup>, MD, Research Associate, Department for Evidence-based Medicine and Clinical  
22  
23  
24 10 Epidemiology, Cochrane Austria, Danube University Krems; gernot.wagner@donau-uni.ac.at  
25

26 11 **Birgit Teufer**<sup>1</sup>, MA, Research Associate, Department for Evidence-based Medicine and Clinical  
27  
28 12 Epidemiology, Cochrane Austria, Danube University Krems; birgit.teufer@donau-uni.ac.at  
29

30 13 **Stefanie Auer**<sup>3</sup>, Professor, Department of Clinical Neurosciences and Preventive Medicine, Danube  
31  
32  
33 14 University Krems; Stefanie.auer@donau-uni.ac.at  
34

35 15 **Christoph Gisinger**<sup>4</sup>, Professor, Center for Geriatric Medicine and Geriatric Nursing, Danube  
36  
37 16 University Krems; christoph.gisinger@donau-uni.ac.at  
38

39 17 **Monika Kil**<sup>2</sup>, Professor, Department for Continuing Education Research and Educational  
40  
41  
42 18 Management, Danube University Krems; monika.kil@donau-uni.ac.at  
43

44 19 **Irma Klerings**<sup>1</sup>, Department for Evidence-based Medicine and Clinical Epidemiology, Cochrane  
45  
46 20 Austria, Danube University Krems; irma.klerings@donau-uni.ac.at  
47

48 21 **Gerald Gartlehner**<sup>1,5</sup>, MD, MPH, Professor, RTI-University of North Carolina Evidence based Practice  
49  
50  
51 22 Center, RTI International; gerald.gartlehner@donau-uni.ac.at  
52

53 23  
54  
55 24 <sup>1</sup> Department for Evidence-based Medicine and Clinical Epidemiology, Cochrane Austria, Danube  
56  
57 25 University Krems, Dr. Karl Dorrek Straße 30, 3500 Krems, Austria  
58  
59  
60

1  
2 26 <sup>2</sup> Department for Continuing Education Research and Educational Management, Danube University  
3

4 27 Krems, Dr. Karl Dorrek Straße 30, 3500 Krems, Austria  
5

6 28 <sup>3</sup> Department of Clinical Neurosciences and Preventive Medicine, Danube University Krems, Dr. Karl  
7

8 29 Dorrek Straße 30, 3500 Krems, Austria  
9

10 30 <sup>4</sup> Center for Geriatric Medicine and Geriatric Nursing, Danube University Krems, Dr. Karl Dorrek  
11

12 31 Straße 30, 3500 Krems, Austria  
13

14 32 <sup>5</sup> RTI International, 3040 Cornwallis Road, PO Box 12194, Research Triangle Park, North Carolina,  
15

16 33 27709-2194, USA  
17

18 34 **Corresponding Author:** Nina Matyas, MD, MSc (nina.matyas@ext.donau-uni.ac.at)  
19

20 35 **Key words:** systematic review, dementia, mild cognitive impairment, prevention, continuing  
21

22 36 education  
23

24 37 **Word count: 3876**  
25

26 38  
27  
28  
29  
30  
31  
32  
33  
34  
35  
36  
37  
38  
39  
40  
41  
42  
43  
44  
45  
46  
47  
48  
49  
50  
51  
52  
53  
54  
55  
56  
57  
58  
59  
60

## 39 **ABSTRACT**

40 **Objective:** To summarize evidence on the preventive effects of continuing education on mild  
41 cognitive impairment and Alzheimer's-type dementia in adults 45 years or older.

42 **Design:** Systematic review and overview of systematic reviews.

43 **Data sources:** We systematically searched MEDLINE, PsycINFO, EMBASE, CENTRAL, CINAHL and  
44 Scopus for published studies and gray literature databases for unpublished studies from January  
45 1990 to April 2018.

46 **Methods:** To assess evidence directly addressing our objectives, we conducted a systematic review.  
47 Because we were aware of a dearth of direct evidence, we also performed an overview of systematic  
48 reviews on leisure activities that mimic formal continuing education. We a priori established inclusion  
49 and exclusion criteria. Two authors independently assessed inclusion and exclusion on abstract and  
50 full-text level, rated risk of bias, and determined the certainty of evidence using GRADE. We resolved  
51 all discrepancies by consensus. We synthesized the available evidence narratively.

52 **Results:** Our searches identified 4933 citations. For the systematic review, only two publications on  
53 the same prospective cohort study (Tasmanian Healthy Brain Project) met inclusion criteria; for the  
54 overview of reviews we included five systematic reviews. Based on 459 participants, preliminary data  
55 of the ongoing cohort study indicated that cognitive reserve statistically significantly increased in  
56 persons attending university classes compared to the control group (92.5% vs. 55.7%). Likewise,  
57 language processing capacities statistically significantly improved. Episodic memory, working  
58 memory, and executive function did not differ significantly between groups.

59 Systematic reviews consistently reported a positive association between participation in cognitively  
60 stimulating leisure activities and reduced incidence of dementia and improved cognitive test  
61 performance.

62 **Conclusion:** Available results demonstrate that cognitive reserve increases through continuing  
63 education and show a positive association of cognitive leisure activities with both improved cognitive

1  
2 64 function and lower dementia incidence. Healthcare providers and policymakers should promote a  
3  
4 65 healthy lifestyle, which also includes being cognitively active throughout life.  
5

6 66 **Systematic review registration:** PROSPERO CRD42017063944  
7  
8  
9 67  
10  
11 68  
12

13 69 **Strengths and Limitations of this study:**  
14

- 15 70 • This is the first systematic review assessing the benefits and harms of continuing education  
16  
17 71 on the prevention of mild cognitive impairment or Alzheimer's type dementia.  
18  
19  
20 72 • This is the first overview of systematic reviews presenting an up-to-date summary of  
21  
22 73 currently available research in the field of cognitive leisure activities and dementia.  
23  
24 74 • The certainty of evidence is low, indicating that future studies might have a substantial  
25  
26 75 impact on results of our review.  
27  
28  
29 76 • Measurements and types of cognitive leisure activities differed widely across studies and  
30  
31 77 quantitative analysis were often not possible.  
32  
33 78 • The majority of included systematic reviews have serious methodological shortcomings.  
34  
35  
36 79  
37  
38 80  
39  
40  
41  
42  
43  
44  
45  
46  
47  
48  
49  
50  
51  
52  
53  
54  
55  
56  
57  
58  
59  
60

## 81 INTRODUCTION

82 In 2012, the World Health Organization (WHO) named the prevention and control of  
83 neurocognitive disorders such as mild cognitive impairment or Alzheimer's-type dementia a global  
84 public health priority.<sup>1</sup> Alzheimer's-type dementia is the most common form of dementia.<sup>1</sup> In 2018,  
85 50 million people worldwide lived with Alzheimer's disease or another closely related form of  
86 dementia.<sup>2</sup> As a consequence of the rapidly aging world population, the prevalence of dementia is  
87 projected to rise up to 152 million people in 2050.<sup>2</sup>

88 The progressive loss of independent functioning of people with Alzheimer's-type dementia,  
89 leads to an enormous social and economic burden. In 2018, the U.S. economic burden associated  
90 with Alzheimer's type dementia was estimated to be 277 billion U.S. Dollars.<sup>3</sup> The total global costs  
91 for dementia were about a trillion US dollar in 2018.<sup>2</sup>

92 The Diagnostic and Statistical Manual (DSM-5) characterizes Alzheimer's disease as a  
93 significant decline of intellectual abilities in one or more cognitive domains (learning and memory,  
94 language, executive function, complex attention, perceptual motor function, social cognition) outside  
95 the context of delirium.<sup>4</sup>

96 Any dementia diagnosis, however, is frequently preceded by a long period of subclinical  
97 neuropathological disorder with subjective cognitive disorder and mild cognitive disorder as a  
98 transition phase before diagnostic criteria for dementia are fulfilled.<sup>5</sup> If cognitive decline progresses  
99 to a degree that a person's capability of carrying out everyday activities is significantly affected, this  
100 state is called major neurocognitive disorder.<sup>4,5</sup>

101 The risk of developing neurocognitive disorders increases substantially with age. The  
102 prevalence of Alzheimer's type dementia is 3.5% in persons aged 75 or older and 46.3% in those 95  
103 years or older.<sup>6</sup> It is estimated that 15 to 20 percent of people age 65 or older are living with mild  
104 cognitive impairment.<sup>3</sup> Other risk factors than age contributing to the development of dementia are  
105 not yet thoroughly understood. In recent years, epidemiological studies have linked the development  
106 of dementia with risk factors such as low educational level, unhealthy diet, decreased physical

1  
2 107 activity, and smoking.<sup>7,8</sup> In addition, potential predictors of dementia are chronic medical conditions  
3  
4 108 such as cardiovascular diseases, diabetes, obesity, cancers, depression, thyroid disorder, or genetic  
5  
6 109 factors.<sup>9</sup> Some studies, however, found a protective association of cognitively stimulating activities,  
7  
8 110 such as learning a new language in middle age, with a slower cognitive decline during late life.<sup>10-14</sup>  
9  
10 111 Such results underpin the “cognitive reserve hypothesis”.<sup>15-17</sup> According to this theory, through every  
11  
12 112 activity that stimulates the brain, the cognitive reserve gets boosted and the resistance towards any  
13  
14 113 dementia-related brain pathology increases.<sup>18</sup> In animal trials, an enriched environment was  
15  
16 114 associated with increased cortical thickness.<sup>19</sup> Epidemiological research on humans has shown that  
17  
18 115 education<sup>20</sup> and probably also other forms of intellectual stimulation, during the whole lifespan, are  
19  
20 116 associated with a lower risk to develop dementia.<sup>21, 22</sup> A larger cognitive reserve acquired by  
21  
22 117 continuing education activities, thus, might protect against cognitive decline.<sup>18, 23</sup>  
23  
24  
25

26 118 Continuing education activities are structured learning activities offered by educational  
27  
28 119 institutes. These activities are designed to help individuals satisfy learning needs and interests after  
29  
30 120 compulsory schooling, to enrich knowledge, to develop and improve abilities and skills, and to foster  
31  
32 121 personality, social competences, families, networks, health, and professional life. Continuing  
33  
34 122 education is voluntary, based on topics and courses that are not directly connected to any special job  
35  
36 123 position or vocational training.<sup>24-29</sup> Cognitive leisure activities (e.g., learning a new language) often  
37  
38 124 mimic continuing education activities but are not taking place within the framework of an  
39  
40 125 educational institution.  
41  
42  
43

## 44 126 **Rationale**

45  
46  
47 127 To date, the preventive effect of continuing education on cognitive impairment and Alzheimer’s-type  
48  
49 128 dementia has not been assessed in an objective and systematic way. The aim of our review was to  
50  
51 129 summarize the evidence investigating the preventive effects of continuing education on the  
52  
53 130 development of cognitive impairment and Alzheimer’s-type dementia.  
54  
55

56  
57 131 Our systematic review addressed the following questions:  
58  
59  
60

1  
2 132 **Key question 1a:** In adults 45 years of age or older with normal cognition or merely subjective  
3  
4 133 cognitive impairment, does continuing education lead to a reduction in the risk of mild cognitive  
5  
6 134 impairment or Alzheimer's-type dementia compared with no continuing education?  
7  
8  
9 135 **Key question 1b:** (In case no evidence on continuing education is available or the evidence is sparse):  
10  
11 136 In adults 45 years of age or older with normal cognition or merely subjective cognitive impairment,  
12  
13 137 do cognitive leisure activities lead to a reduction in the risk of mild cognitive impairment or  
14  
15 138 Alzheimer's-type dementia compared with no cognitive leisure activities?  
16  
17  
18 139 **Key question 2:** What are potential harms of continuing education?  
19  
20  
21 140 **Key question 3:** Do benefits and harms differ by subgroups based on age, sex/gender, race or  
22  
23 141 ethnicities, level of education, or duration of intervention?  
24  
25  
26 142 **Key question 4:** What is the optimal age to start continuing education to prevent mild cognitive  
27  
28 143 impairment or dementia?  
29  
30

31  
32  
33

## 145 **METHODS**

### 146 **Design**

147 Throughout this manuscript we followed the PRISMA (Preferred Reporting Items for  
148 Systematic Reviews and Meta-Analyses) statement<sup>30</sup> (see supplementary file 1). The protocol of this  
149 systematic review was registered in PROSPERO (International Prospective Register of Systematic  
150 Reviews) (Registration number CRD42017063944) and published previously.<sup>31</sup> Figure 1 depicts the  
151 analytic framework that guided our systematic review.

152 [Figure 1 about here]

153 For this systematic review, we define continuing education as structured learning activities  
154 and programs provided by formal and non-formal educational institutions for persons beyond the  
155 age of compulsory schooling (in most countries 16 years and older).<sup>24-29</sup>

156 We addressed our research questions with two different methodological approaches:

1  
2 157 1) We performed a systematic review of primary studies to assess the preventive  
3  
4 158 effects and potential harms of continuing education provided by formal and non-formal  
5  
6 159 institutions (key questions 1a, 2, 3, and 4).  
7

8 160 2) We conducted an overview of systematic reviews to determine the preventive effects  
9  
10 161 and potential harms of related leisure activities (e.g. playing cards, reading books, etc., key  
11  
12 162 question 1b).  
13

14  
15 163 We chose this two-step approach because studies in the field of continuing education and  
16  
17 164 dementia are very rare. Certain leisure activities, however, are able to mimic continuing education  
18  
19 165 regarding content (e.g. learning a new language privately versus learning a new language as an  
20  
21 166 organized educational activity). Leisure activities are not our primary focus of interest but can be  
22  
23 167 considered as proxy interventions for continuing education in some circumstances.  
24  
25  
26  
27 168

## 28 29 169 **Study selection**

### 30 31 170 **Eligibility criteria for the systematic review**

32  
33 171 The population of interest were adults 45 years or older, without a clinical diagnosis of  
34  
35 172 cognitive impairment at the time of study recruitment, which included people with subjective  
36  
37 173 cognitive impairment. Eligible interventions comprised of all cognitive activities that are provided by  
38  
39 174 formal and non-formal educational institutions. These activities include classes, courses, and  
40  
41 175 trainings that are based on individual interests and that are attended voluntarily. We included  
42  
43 176 randomized controlled trials, nonrandomized controlled trials, prospective controlled cohort studies,  
44  
45 177 retrospective controlled cohort studies, and case-control studies. All nonrandomized studies needed  
46  
47 178 to have a minimum sample size of 300 or more participants.  
48  
49

50  
51 179 Eligible studies had a minimum follow up time of 1 year and a minimum duration of  
52  
53 180 intervention of 3 months. We excluded studies that investigated formal (vocational) education (e.g.  
54  
55 181 School or College), physical activities, and all job-related courses and trainings.  
56  
57  
58  
59  
60



1  
2 182 Outcomes of interest included patient-relevant health outcomes such as incidence of  
3  
4 183 dementia, incidence of MCI, psychological wellbeing, functional capacity, quality of life, and other  
5  
6 184 relevant health outcomes; in addition, we included intermediate outcomes such as cognitive  
7  
8 185 functioning, cognitive (test) performance, or social inclusion. For the purpose of our study, mild  
9  
10 186 cognitive impairment refers to “amnesic” mild cognitive impairment (aMCI), meaning that memory  
11  
12 187 loss is the predominant symptom.<sup>32</sup>

### 16 188 **Eligibility criteria for the overview of systematic reviews**

18 189 Eligibility criteria for population and outcomes for the overview of systematic reviews were  
19  
20 190 the same as for the systematic review. Eligible interventions were leisure activities that are  
21  
22 191 cognitively stimulating and mimic the content of continuing education but in an informal setting. Just  
23  
24 192 as in the systematic review, we excluded physical activities. Eligible study designs were exclusively  
25  
26 193 systematic reviews and meta-analyses. We excluded reviews with searches conducted before 2013.

27  
28 194 Further details about our inclusion and exclusion criteria can be found in our protocol<sup>31</sup> and  
29  
30 195 in the supplementary file 2.

### 35 196 **Search strategy**

36  
37 197 We systematically searched Ovid MEDLINE, Cochrane Library, Embase, PsycINFO, CINAHL  
38  
39 198 (Cumulative Index to Nursing and Allied Health Literature), ALOIS (the Cochrane Dementia and  
40  
41 199 Cognitive Improvement Group Specialized Register), and ERIC (Education Resources Information  
42  
43 200 Center) from January 1990 to April 2018 to identify relevant publications (see supplementary file 3  
44  
45 201 for the search strategy). For the overview of reviews, we searched Epistemonikos from inception to  
46  
47 202 April 2018 in addition to the above mentioned databases (see supplementary file 4).

48  
49  
50  
51 203 An experienced information specialist developed an appropriate search strategy using a  
52  
53 204 combination of medical subject headings (MeSH®) and title and abstract keywords, limiting the  
54  
55 205 search to human-only studies without applying any language limitations. The electronic Ovid Medline  
56  
57 206 search strategy was peer-reviewed by another information specialist following the PRESS (peer  
58  
59  
60

1  
2 207 review of the electronic search strategy) statement.<sup>33</sup> For the systematic review, we searched for  
3  
4 208 gray literature in ClinicalTrials.gov, the World Health Organization's International Clinical Trials  
5  
6 209 Registry Platform, web pages of relevant organizations, and a dissertation database ("Digital Access  
7  
8 210 to Research Theses", DART-Europe). Additionally, in an attempt to avoid retrieval bias, we manually  
9  
10 211 searched the reference lists of landmark studies and background articles on this topic to look for any  
11  
12 212 relevant citations that our electronic searches might have missed. We imported all citations into an  
13  
14 213 electronic database (EndNote X.8) and deleted duplicates.

#### 18 214 **Study selection**

20 215 Two review authors independently screened abstracts and relevant full text articles for  
21  
22 216 eligibility, using Covidence Software.<sup>34</sup> They resolved disagreements by discussion or by consultation  
23  
24 217 with a third author.

#### 28 218 **Data abstraction**

31 219 We designed, pilot-tested, and used a data abstraction form to gather pertinent information  
32  
33 220 from each article. One author extracted relevant data from each study that met our inclusion criteria.  
34  
35 221 A second author of the team cross-checked data abstractions for completeness and accuracy. We  
36  
37 222 extracted study information (author, publication year, years covered by searches, location/setting,  
38  
39 223 number of included studies and included study designs), sample size, study characteristics  
40  
41 224 (population, interventions, and comparators), outcome measurements, and results. For systematic  
42  
43 225 reviews we abstracted summary estimates of meta-analyses whenever available.  
44  
45

#### 47 226 **Risk of bias assessment**

49 227 Two investigators independently assessed the risk of bias of included studies. They resolved  
50  
51 228 any disagreements by consensus or by consulting a third team member. For eligible non-randomized  
52  
53 229 studies we used the ROBINS-I (Risk Of Bias In Non-randomized Studies - of Interventions) tool.<sup>35</sup> For  
54  
55 230 the assessment of eligible systematic reviews, we used the AMSTAR (Assessing the Methodological  
56  
57  
58  
59  
60

231 Quality of Systematic Reviews) tool.<sup>36</sup> Detailed risk of bias ratings of included articles are given in  
232 supplementary file 5.

### 233 **Data synthesis and statistical analysis**

234 We narratively summarized evidence from included studies. If available, we present effect  
235 estimates of systematic reviews. For the incidence of dementia we present hazard ratios (HR), odds  
236 ratios (OR), and risk ratios (RR). For the assessment of cognitive test performance we use  
237 standardized mean differences because scales for measurements differed in the individual studies. A  
238 standardized mean difference of 0 indicates that both groups had the same cognitive test  
239 performance.

### 240 **Certainty of evidence**

241 We followed the recommendations of the GRADE (Grading of Recommendations  
242 Assessment, Development and Evaluation) working group for rating the certainty of evidence for  
243 each outcome.<sup>37</sup>

### 244 **Patient involvement**

245 No patients were involved in the development of this research paper.

## 247 **RESULTS**

248 Our search identified in total 4933 citations after exclusion of duplicates. Based on title and  
249 abstract review, we considered 58 primary studies and 28 systematic reviews for full-text review.  
250 After scrutinising the full-text articles, we included two publications of one primary study<sup>38 39</sup> and five  
251 systematic reviews.<sup>40-44</sup> Figure 2 and figure 3 depict the study selection process. Supplementary file 6  
252 provides a list of excluded studies at full-text level.

253 [Figure 2 and figure 3 about here]

### 254 **Study characteristics**

### 255 **Systematic Review**

1  
2 256 We included two publications<sup>38 39</sup> that present interim findings of the same medium risk of  
3  
4 257 bias prospective cohort study, namely the Tasmanian Healthy Brain Project that plans to follow  
5  
6 258 participants for 10-20 years.<sup>45</sup> The two publications analysed different aspects of cognitive  
7  
8 259 functioning of the same 459 participants who did or did not engage in a 12 month, part-time or full-  
9  
10 260 time university-level education. Participants' mean age was 59.6±7 (mean±SD) years in the  
11  
12 261 intervention group and 62.4±6 years in the control group with a follow-up period of 4 years.  
13  
14 262 Participants completed a neuropsychological test battery, consisting of 14 tests each year.<sup>45</sup>  
15  
16

17 263 In this study, selection bias is likely because participants voluntarily opted for university  
18  
19 264 courses or no further education. It is not clear if investigators used appropriate methods to adjust for  
20  
21 265 potential confounders (see supplementary file 5 for risk of bias ratings).  
22  
23  
24

## 25 266 **Overview of Reviews**

26  
27 267 All five included systematic reviews investigated the benefits of cognitive leisure activities in  
28  
29 268 adults over the age of 45 years.<sup>40-44</sup> Four studies included any cognitive leisure activities in their  
30  
31 269 analyses (e.g. reading books, doing crosswords, attending cultural events, knitting, painting), one  
32  
33 270 study<sup>43</sup> specifically focused on the benefits of playing video games in older adults. The number of  
34  
35 271 participants investigated in the reviews ranged from 913<sup>43</sup> to 24,554.<sup>41</sup>  
36  
37

38 272 We rated three of the included systematic reviews<sup>40 42 43</sup> as high and two studies<sup>41 44</sup> as  
39  
40 273 medium risk of bias. Reasons for the high risk of bias ratings were lack of critical appraisal of included  
41  
42 274 studies, single review of the literature, and insufficient literature searches (see supplementary file 5).  
43  
44

45 275 We graded the evidence for all meta-analysis outcomes with low certainty of evidence  
46  
47 276 mostly because of high inconsistency and indirectness among studies (see supplementary file 7).  
48  
49

50 277 We present characteristics of included studies<sup>40-44</sup> in table 1 and table 2.  
51  
52  
53  
54  
55  
56  
57  
58  
59  
60

1  
2  
3  
4  
5  
6  
7  
8  
9  
10  
11  
12  
13  
14  
15  
16  
17  
18  
19  
20  
21  
22  
23  
24  
25  
26  
27  
28  
29  
30  
31  
32  
33  
34  
35  
36  
37  
38  
39  
40  
41  
42  
43  
44  
45  
46

| Reference                         | Study design                                                          | Aim                                                                                                                                                             | Sample Size                                            | Population                        | Intervention                                                                          | Measurements                                                                                                                   | Outcomes                                                                                                                                                         | Risk of bias |
|-----------------------------------|-----------------------------------------------------------------------|-----------------------------------------------------------------------------------------------------------------------------------------------------------------|--------------------------------------------------------|-----------------------------------|---------------------------------------------------------------------------------------|--------------------------------------------------------------------------------------------------------------------------------|------------------------------------------------------------------------------------------------------------------------------------------------------------------|--------------|
| Lenhan et al., 2016 <sup>39</sup> | Prospective cohort study, Tasmanian Healthy Brain Project (2011-2016) | To investigate changes in cognitive reserve in healthy older adults participating over four years in university-level education.                                | 459 (359 in the Intervention group, 100 control group) | 50-79 years, healthy older adults | Minimum of 12 months of part-time or full-time university study<br>Follow-up: 4 years | Prior Cognitive reserve and current cognitive reserve were calculated for each participant.                                    | 55,7% in the control group vs. 92,5% in the university education group showed a significant increase of cognitive reserve                                        | Medium       |
| Thow et al., 2018 <sup>38</sup>   |                                                                       | To determine if the observed increase in cognitive reserve among older adults attending university is associated with a change in cognitive function over time. |                                                        |                                   |                                                                                       | Episodic memory, working memory, executive function, and language processing performances were assessed annually over 4 years. | Statistically significant improvement of language processing capacity.<br><br>No significant improvement of episodic memory, working memory, executive function. | Medium       |

Table 1: Study Characteristics of included primary studies

| Reference                            | Aim                                                                                                                                                                                          | Search Strategy                                                                                                                                        | N of included studies                 | Study design                                                    | Total number of participants   | Population                                     | Outcomes                                                                                                                                                                                                                           | Risk of bias |
|--------------------------------------|----------------------------------------------------------------------------------------------------------------------------------------------------------------------------------------------|--------------------------------------------------------------------------------------------------------------------------------------------------------|---------------------------------------|-----------------------------------------------------------------|--------------------------------|------------------------------------------------|------------------------------------------------------------------------------------------------------------------------------------------------------------------------------------------------------------------------------------|--------------|
| Di Marco et al., 2014 <sup>40</sup>  | To provide a comprehensive summary of modifiable lifestyle factors (dietary habits, leisure activities, social network et cetera.) associated with the risk of late-onset incident dementia. | NR to 2013<br>PubMed, Ovid MEDLINE, PsycINFO, In-Process and other non-indexed citations<br><br>Search terms provided<br>English language publications | 6 (cognitive leisure activities)      | Longitudinal observational cohort-studies                       | NR                             | ≥65 years, adults without dementia at baseline | No quantitative analysis<br><br>Cognitive leisure activities might be associated with <b>reduced incidence of all-cause dementia</b>                                                                                               | High         |
| Opdebeeck et al., 2016 <sup>41</sup> | To assess the relationship between cognitive reserve (educational level, occupational status and engagement in cognitively stimulating activities) and cognition in multiple domains.        | NR to 2014<br>PubMed, PsycInfo, ScienceDirect, CINHALL<br><br>Search terms provided                                                                    | 31 (cognitive stimulating activities) | 31 Cross-sectional studies                                      | 24561                          | ≥60 years (at least 80% of study participants) | SMD 0.26 (95% CI 0.21-0.32)<br><br>Participating in cognitive leisure activities is associated with <b>improved cognitive functions</b> (including memory, working memory, executive function, visuospatial ability, and language) | High         |
| Sajeev et al., 2016 <sup>42</sup>    | To assess if engaging in late-life cognitive activities is able to delay or prevent dementia.                                                                                                | NR to June 2014<br>PubMed and EMBASE                                                                                                                   | 12 (cognitive stimulating activities) | 10 prospective cohort studies;<br>2 nested case-control studies | 13939 (dementia: 1663 AD: 565) | ≥45 years                                      | No quantitative analysis                                                                                                                                                                                                           | Medium       |

|                                  |                                                                                                                              |                                                                                                                 |                                   |                                                 |                                         |                                                                                      |                                                                                                                                                                                                                                                                                                   |        |
|----------------------------------|------------------------------------------------------------------------------------------------------------------------------|-----------------------------------------------------------------------------------------------------------------|-----------------------------------|-------------------------------------------------|-----------------------------------------|--------------------------------------------------------------------------------------|---------------------------------------------------------------------------------------------------------------------------------------------------------------------------------------------------------------------------------------------------------------------------------------------------|--------|
|                                  |                                                                                                                              | No search terms provided                                                                                        |                                   |                                                 |                                         |                                                                                      | Late-life cognitive activity might be associated with <b>lower AD and/or all-cause dementia incidence</b>                                                                                                                                                                                         |        |
| Toril et al., 2014 <sup>43</sup> | To investigate the extent to which cognitive training with video games enhances cognitive functions in healthy older adults. | 1986-2013<br>MEDLINE, PsycInfo and Google Scholar<br><br>Search terms provided<br>English language publications | 20 (video game training)          | 18 controlled studies<br>2 uncontrolled studies | 913 (474 trained, 439 healthy controls) | 50 - 86 years, healthy older adults                                                  | SMD 0.37 (95% CI 0.26 – 0.48)<br><br>Video game training is associated with <b>improved cognitive functions</b> in older adults (including memory, attention, reaction time, cognitive function, executive functions)                                                                             | High   |
| Yates et al., 2016 <sup>44</sup> | To assess the impact of cognitively stimulating leisure activities on cognition and risk of dementia in later life.          | 2004 – 2014<br>PsychInfo, MEDLINE, CINAHL, EMBASE and the Web of Science<br><br>Search terms provided           | 19 (cognitive leisure activities) | 17 Cohort studies<br>2 Case control studies     | 32546                                   | ≥ 46 years, cognitively healthy adults (i.e. no diagnosis of impairment or dementia) | <b>All-cause dementia incidence:</b><br>RR 0.61 (95%CI 0.42 – 0.90), k=3, RE<br>HR 0.58 (95%CI 0.46 – 0.74), k=2, RE<br>OR 0.78 (95%CI 0.67 – 0.90), k=2, FE<br><br><b>Cognitive impairment incidence:</b><br>OR 0.69 (95%CI 0.56 – 0.85), k=5, RE<br>HR 0.85 (95% CI 0.71 – 1.02), k=3, RE, n.s. | Medium |

NR = Not reported, AD = Alzheimer's-type dementia, k = studies that assessed cognitive activities only, n= number of participants, RE = random-effects model, FE = fixed effects model, n.s. = not significant

**Table 2: Study Characteristics of included systematic reviews**

## 287 **Outcomes**

### 288 **Key question 1a: Continuing education**

289 Two interim analyses of the Tasmanian Healthy Brain Project focused on language  
290 processing<sup>38</sup> and cognitive reserve<sup>39</sup> after 4 years of follow-up. To date, no results on the incidence of  
291 mild cognitive impairment or Alzheimer's-type dementia are available yet. Both studies reported  
292 beneficial effects of continuing education. Thow and colleagues<sup>38</sup> showed that attending university  
293 courses over a period of 12 months statistically significantly ( $p<0.05$ ) improved the language  
294 processing capacity in the intervention group compared to the control group. No statistically  
295 significant differences were detected for episodic memory, working memory, and executive function  
296 between groups. In all analyses, authors accounted for age and prior cognitive reserve (education,  
297 pre-existing intellectual capacity, life-experience).

298 Lenehan and coworkers<sup>39</sup> demonstrated by conducting growth mixture modeling that the  
299 cognitive reserve statistically significantly increased in 92.5% of participants in the intervention group  
300 ( $n=359$ ) compared to 55.7% of participants in the control group ( $n=100$ ). Investigators created a  
301 proxy measure of "current cognitive reserve" to capture dynamic changes in cognitive reserve over  
302 time, including intellectual capacity and academic ability.<sup>46</sup>

### 303 **Key question 1b: Cognitive leisure activities**

304 Overall, the five included systematic reviews reported consistently that participation in  
305 cognitive stimulating leisure activities can reduce the risk of developing mild cognitive impairment or  
306 Alzheimer's-type dementia and improves cognitive functioning of healthy older adults.

307 Two systematic reviews<sup>40,42</sup> investigated the impact of cognitive leisure activities on the  
308 incidence of Alzheimer's-type dementia. Di Marco and colleagues included six, Sajeev and colleagues  
309 12 primary studies on cognitive leisure activities in their systematic reviews. Both systematic reviews  
310 concluded that leisure activities protect against dementia. Due to different categorization of  
311 cognitive leisure activities and a high heterogeneity between studies, quantitative analyses were not  
312 possible in the two reviews. The effect estimates of included studies ranged from hazard ratios [HR]

1  
2 313 of 0.39 (95% CI: 0.21 - 0.71)<sup>47</sup> to HR of 0.93 (95% CI: 0.88 – 0.98)<sup>48</sup> showing statistically significantly  
3  
4 314 reduced risks of Alzheimer's-type dementia when carrying out leisure activities. Sajeev et al.<sup>42</sup>  
5  
6 315 performed an extensive bias analysis indicating that it is unlikely that the observed positive effects of  
7  
8 316 cognitively stimulating activities on dementia incidence are exclusively explained by unmeasured  
9  
10 317 confounders or reverse causation.

11  
12  
13 318 One review<sup>44</sup> assessed both incidence of mild cognitive impairment and Alzheimer's-type  
14  
15 319 dementia and cognitive test performance. The authors conducted five meta-analyses based on  
16  
17 320 groups for outcomes and reported effect estimates (risk ratio [RR], odds ratio [OR], and hazard ratio  
18  
19 321 [HR]). Four out of five meta-analyses revealed statistically significant results showing that cognitive  
20  
21 322 leisure activities were associated with a reduction of dementia incidence (RR = 0.61, 95% CI: 0.42-  
22  
23 323 0.90; HR = 0.58, 95% CI: 0.46-0.74, OR = 0.78, 95% CI: 0.67 – 0.90) and a reduction of cognitive  
24  
25 324 impairment incidence (OR = 0.69, 95% CI: 0.56 – 0.85). However, one meta-analysis, combining three  
26  
27 325 cohort studies did not reach statistical significance (HR = 0.85, 95% CI: 0.71-1.02) for reduction of  
28  
29 326 cognitive impairment. A narrative analysis of primary studies assessing cognitive test performance  
30  
31 327 showed a statistically significant improvement of memory, speed of processing, language, and  
32  
33 328 executive functioning and overall later life cognition.

34  
35  
36 329 Two other included studies<sup>41 43</sup>, both rated as high risk of bias, focused on cognitive test  
37  
38 330 performance. Opdebeeck et al.<sup>41</sup> reported a benefit in overall cognitive abilities for the group  
39  
40 331 involving in cognitive leisure activities (standardized mean difference [SMD] of 0.26 (95% confidence  
41  
42 332 interval [CI]: 0.21-0.32). The cognitive domains included memory, working memory, executive  
43  
44 333 function, visuospatial ability, and language. According to the review by Toril et al. <sup>43</sup>, playing video  
45  
46 334 games enhanced several cognitive functions. They observed a SMD of 0.37 (95% CI 0.26 – 0.48) for  
47  
48 335 global cognitive function (combining results for memory, attention, reaction time and executive  
49  
50 336 functions), showing a benefit for the intervention group.

## 51 337 **Key question 2: Harms**

52  
53  
54 338 We found no evidence regarding harms of continuing education or cognitive leisure activities.  
55  
56  
57  
58  
59  
60



1  
2 339 **Key question 3: Subgroups**  
3

4  
5 340 Toril and colleagues<sup>43</sup> performed several subgroup analyses. The study revealed that the age  
6  
7 341 of the participants and the number of video game training sessions significantly changed the effect  
8  
9 342 size. Older participants (between 71 and 80 years) seemed to benefit more from computer training  
10  
11 343 than younger participants (60 to 70 years). For the improvement of cognitive test performance,  
12  
13 344 shorter training sessions (1-6 weeks) seemed to show an advantage over longer training  
14  
15 345 interventions (7-12 weeks). By contrast, for incidence of Alzheimer's-type dementia, DiMarco et al.<sup>40</sup>  
16  
17 346 and Sajeev et al.<sup>42</sup> infer from their data that greater participation in cognitive leisure activities over a  
18  
19 347 longer period of time contributes positively to the protective effect.  
20  
21  
22

23 348 **Key question 4: Optimal age**  
24

25 349 No study specifically discussed the optimal age to start with continuing education activities or  
26  
27 350 cognitive leisure activities to prevent mild cognitive impairment or dementia.  
28  
29  
30  
31  
32  
33  
34  
35  
36  
37  
38  
39  
40  
41  
42  
43  
44  
45  
46  
47  
48  
49  
50  
51  
52  
53  
54  
55  
56  
57  
58  
59  
60

1  
2 351 **DISCUSSION**

3  
4 352 The evidence assessing the impact of continuing education on the risk of MCI or Alzheimer-  
5  
6 353 type dementia is limited. The only eligible primary study (Tasmanian Healthy Brain project)<sup>45</sup> is still  
7  
8 354 ongoing but preliminary findings after four years of follow-up demonstrated that the dynamic nature  
9  
10 355 of cognitive reserve permits improvements through education even at an advanced age.  
11  
12 356 Nevertheless, these early findings have to be viewed cautiously. In addition, selection bias could  
13  
14 357 potentially distort results of the Tasmanian Healthy Brain project because participants voluntarily  
15  
16 358 opted for university courses or no further education. The available publications did not explain  
17  
18 359 sufficiently how baseline differences such as comorbid diseases were taken into consideration during  
19  
20 360 the analyses.  
21  
22  
23

24 361 Because of the limited direct evidence, we focused on cognitive leisure activities as proxies  
25  
26 362 for formal continuing education. Overall, the available evidence consistently indicates beneficial  
27  
28 363 effects of cognitive leisure activities by improving the cognitive function of older adults and reducing  
29  
30 364 the incidence of MCI and Alzheimer's-type dementia. These findings could be explained by the  
31  
32 365 neuroplasticity of the human brain, which refers to the ability of the brain to adapt to every new  
33  
34 366 stimulus by forming dendritic connections, creating morphological changes and increasing cognitive  
35  
36 367 reserve.<sup>49-51</sup> Neuroplasticity is an intrinsic property of the human brain that allows us to learn and  
37  
38 368 adapt to environmental changes. Depending on the stimuli, the changes can be positive or  
39  
40 369 negative.<sup>49-51</sup> The concept of neuroplasticity is interrelated with the concept of cognitive reserve  
41  
42 370 which refers to morphological changes that support cognitive functioning.<sup>51</sup>  
43  
44  
45

46 371 The magnitudes of beneficial effects, however, varied across systematic reviews and  
47  
48 372 confidence intervals encompassed effect sizes that would not be clinically relevant. Consequently, we  
49  
50 373 rated the certainty of evidence as low or very low which means that future studies are likely to have  
51  
52 374 a substantial impact on these findings.  
53  
54

55 375 To the best of our knowledge, our study was the first assessing the impact of continuing  
56  
57 376 education on MCI and Alzheimer's-type dementia. It is also the first overview of systematic reviews  
58  
59 377 presenting an up-to-date summary of currently available research in the field of cognitive leisure  
60

1  
2 378 activities and dementia. Nevertheless, our work has several limitations. First, in the overview of  
3  
4 379 systematic reviews we had to rely on the quality of included systematic reviews which often had  
5  
6 380 methodological shortcomings (e.g. no risk of bias assessment, no dual screening etc.). Second, most  
7  
8 381 of the included studies were observational studies, which are prone to selection bias because  
9  
10 382 participants self-select the group. Risk factors for MCI or dementia in participants selecting leisure  
11  
12 383 activities or further education might be systematically different from participants in the control  
13  
14 384 groups. For example, people who eventually suffer from preclinical dementia stages might be more  
15  
16 385 likely to avoid cognitive leisure activities, which would lead to reverse causation. Third, many primary  
17  
18 386 studies within the reviews used self-reported questionnaires that could be challenging for people  
19  
20 387 who start having cognitive deficits. Finally, the variation of leisure activity categorization across  
21  
22 388 studies made meta-analysis difficult and sometimes impossible. For example, “visiting a library” was  
23  
24 389 classified as a cognitive activity by one author but as a physical activity by another. Some studies  
25  
26 390 assessed current participation in activities, others participation at younger ages. Additionally, some  
27  
28 391 studies assessed the frequency of participation, others the time devoted to activities and some the  
29  
30 392 total number of leisure activities. Consequently, due to these limitations, the comparability of results  
31  
32 393 among studies was limited. A standardization of measures and methods would be necessary to help  
33  
34 394 synthesize evidence in the future and make more reliable recommendations.

#### 395 **Implication for future research, policy and practice**

396       Based on preliminary results of a long-term cohort study and indirect evidence from studies  
397 on leisure activities, continuing education might be a promising option to help prevent dementia. A  
398 recent study suggests that modifiable risk factors (low education, midlife hypertension, midlife  
399 obesity, diabetes, physical inactivity, smoking, and depression) might be responsible for about a third  
400 of Alzheimer’s-type dementia cases.<sup>52</sup> Hence, considering our results, a campaign promoting to  
401 “actively use the brain by participating in the wide range of continuing education” could possibly be  
402 added to the list of preventive options and could have an impact on the reduction of Alzheimer’s-  
403 type dementia cases. The Finnish Geriatric Intervention Study to Prevent Cognitive Impairment and

1  
2 404 Disability (FINGER)<sup>53</sup>, a randomized controlled trial, with a multi-domain approach (diet, exercise,  
3  
4 405 cognitive training, vascular risk monitoring) supports the hypothesis that simultaneous changes in  
5  
6 406 several risk factors can lead to a protective effect on cognition.  
7

8  
9 407 Further research is needed to address the evidence gap regarding continuing education and  
10  
11 408 the extent to which it acts as a protective factor. A study similar to the Tasmanian Healthy Brain  
12  
13 409 Project<sup>39</sup>, but conducted as a randomized controlled trial, would be ideal because it would  
14  
15 410 adequately handle known and unknown confounders. Computers and Internet could play a more  
16  
17 411 significant role in future prevention trials. Older adults could, for instance, be randomized to attend  
18  
19 412 online courses and communicate with professors and other students in virtual classrooms. This  
20  
21 413 approach could save time, money, and increase the potential participant pool.  
22  
23

#### 24 414 **Conclusion**

25  
26 415 Although no firm conclusions about the effects of continuing education to prevent MCI and  
27  
28 416 dementia can be drawn, data from preliminary and indirect evidence indicate that continuing  
29  
30 417 education could potentially have important preventive effects. Physicians and policymakers should  
31  
32 418 promote a healthy lifestyle, which also includes being cognitively active throughout late life.  
33  
34  
35

36 419  
37  
38  
39  
40  
41  
42  
43  
44  
45  
46  
47  
48  
49  
50  
51  
52  
53  
54  
55  
56  
57  
58  
59  
60

1  
2 420 **Acknowledgments:** We would like to thank Manuela Müllner from Danube University Krems for  
3  
4 421 administrative support.

5  
6 422 **Funding Statement:** This work was supported by internal funds of the Danube-University Krems,  
7  
8 423 Austria. It did not receive financial support from any funding agency in the public, commercial, or  
9  
10 424 not-for profit sectors.

11  
12  
13 425 **Availability of data and materials:** All extracted data are included in the manuscript. There are no  
14  
15 426 additional datasets available.

16  
17 427 **Competing interests:** All authors declare that they have no competing interest.

18  
19 428 **Author Contributions:** All authors made substantial contribution to the conception and design of this  
20  
21 429 study. GG, NM, MK, CG and SA developed the concept of the study. As an information specialist, IK  
22  
23 430 developed the search strategy. GW, FKA, NM and BT conducted the literature review, abstracted  
24  
25 431 data and graded the strength of evidence. NM wrote the first draft of the manuscript; all authors  
26  
27 432 reviewed the manuscript and provided comments. All authors have given approval for this version to  
28  
29 433 be published.  
30  
31  
32

33 434

34  
35 435 **Figure Legends:**

36  
37 436 **Figure 1:** Analytic framework for continuing education to prevent mild cognitive impairment and  
38  
39 437 Alzheimer's-type dementia

40  
41 438 **Figure 2:** Flow diagram of systematic review of continuing education for the prevention of mild  
42  
43 439 cognitive impairment and Alzheimer's-type dementia

44  
45 440 **Figure 3:** Flow diagram of overview of systematic reviews of cognitive leisure activities for the  
46  
47 441 prevention of mild cognitive impairment and Alzheimer's-type dementia  
48  
49  
50

1  
2 442 **List of abbreviations**  
3  
4

- 5 443 AD = Alzheimer Disease  
6 444 aMCI = Amnesic Mild Cognitive Impairment  
7 445 AMSTAR = Assessing the Methodological Quality of Systematic Reviews  
8 446 CEDEFOP = European Centre for the Development of Vocational Training  
9 447 CENTRAL = Cochrane Central Register of Controlled Trials  
10 448 DSM = Diagnostic and Statistical Manual of Mental Disorders  
11 449 GRADE = Grading of Recommendations Assessment, Development and Evaluation  
12 450 HR = Hazard Ratio  
13 451 ICD = International Classification of Diseases  
14 452 MCI = Mild Cognitive Impairment  
15 453 MMSE = Mini-Mental State Examination  
16 454 OECD = Organisation for Economic Co-operation and Development  
17 455 OR = Odds Ratio  
18 456 PRISMA= Preferred Reporting Items for Systematic Reviews and Meta-Analyses  
19 457 ROBINS-I = Risk of Bias in non-randomized studies – of interventions  
20 458 RR = Relative Risk  
21 459 SD = Standard Deviation  
22 460 SMD = Standardized mean difference  
23 461 UNESCO = United Nations Educational, Scientific and Cultural Organization  
24 462 WHO = World Health Organisation  
25  
26  
27  
28  
29  
30  
31  
32  
33  
34  
35  
36  
37  
38  
39  
40  
41  
42  
43  
44  
45  
46  
47  
48  
49  
50  
51  
52  
53  
54  
55  
56  
57  
58  
59  
60

## References

1. World Health Organisation (WHO). Dementia: A Public Health Priority Geneva, Switzerland 2012 [Available from: [http://apps.who.int/iris/bitstream/10665/75263/1/9789241564458\\_eng.pdf?ua=1](http://apps.who.int/iris/bitstream/10665/75263/1/9789241564458_eng.pdf?ua=1) accessed 20 Apr 2017.
2. Patterson C, Lynch C, Bliss A, et al. World Alzheimer Report 2018 - The state of the art of dementia research: New frontiers 2018 [Available from: <https://www.alz.co.uk/research/WorldAlzheimerReport2018.pdf> accessed 15 Feb 2019.
3. Alzheimer's Association. Alzheimer's Disease Facts and Figures 2018 [Available from: <https://www.alz.org/media/HomeOffice/Facts and Figures/facts-and-figures.pdf> accessed 15 Feb 2019.
4. Association AP. Diagnostic and Statistical Manual of Mental Disorders, Fifth Edition (DSM-5): Arlington, VA: American Psychiatric Publishing 2013.
5. Committee on Decreasing the Risk of Alzheimer's-Type Dementia. Mild Cognitive Impairment Age-Related Cognitive IBoHS, Policy Institute of, Medicine National Academies of Sciences, Engineering Medicine. The National Academies Collection: Reports funded by National Institutes of Health. *Considerations for the Design of a Systemic Review of Interventions for Preventing Clinical Alzheimer's-Type Dementia, Mild Cognitive Impairment, and Age-Related Cognitive Decline: Letter Report* 2015. <https://www.nap.edu/catalog/21885/considerations-for-the-design-of-a-systemic-review-of-interventions-for-preventing-clinical-alzheimers-type-dementia-mild-cognitive-impairment-and-age-related-cognitive-decline>.
6. Reynish E, Fratiglioni L, Prince M, et al. EUROCODE Prevalence of dementia in Europe 2006 [Available from: [https://ec.europa.eu/health/archive/ph\\_information/dissemination/diseases/docs/eurocode.pdf](https://ec.europa.eu/health/archive/ph_information/dissemination/diseases/docs/eurocode.pdf) accessed 6 Mar 2017.
7. Alonso A, Jacobs DR, Jr., Menotti A, et al. Cardiovascular risk factors and dementia mortality: 40 years of follow-up in the Seven Countries Study. *Journal of the neurological sciences* 2009;280(1-2):79-83. doi: 10.1016/j.jns.2009.02.004 [published Online First: 2009/03/03]
8. Scarmeas N, Luchsinger JA, Schupf N, et al. Physical activity, diet, and risk of Alzheimer disease. *Jama* 2009;302(6):627-37. doi: 10.1001/jama.2009.1144 [published Online First: 2009/08/13]
9. Institute of Medicine (IOM). Cognitive aging: progress in understanding and opportunities for action. Washington, DC: The National Academies Press 2015:109-47.
10. Wilson RS, Boyle PA, Yu L, et al. Life-span cognitive activity, neuropathologic burden, and cognitive aging. *Neurology* 2013;81(4):314-21. doi: 10.1212/WNL.0b013e31829c5e8a [published Online First: 2013/07/05]
11. Bosma H, van Boxtel MP, Ponds RW, et al. Engaged lifestyle and cognitive function in middle and old-aged, non-demented persons: a reciprocal association? *Zeitschrift fur Gerontologie und Geriatrie* 2002;35(6):575-81. doi: 10.1007/s00391-002-0080-y [published Online First: 2002/12/20]
12. Hultsch DF, Hertzog C, Small BJ, et al. Use it or lose it: engaged lifestyle as a buffer of cognitive decline in aging? *Psychology and aging* 1999;14(2):245-63. [published Online First: 1999/07/14]
13. Wilson RS, Mendes De Leon CF, Barnes LL, et al. Participation in cognitively stimulating activities and risk of incident Alzheimer disease. *Jama* 2002;287(6):742-8. [published Online First: 2002/02/20]
14. Wilson RS, Scherr PA, Schneider JA, et al. Relation of cognitive activity to risk of developing Alzheimer disease. *Neurology* 2007;69(20):1911-20. doi: 10.1212/01.wnl.0000271087.67782.cb [published Online First: 2007/06/29]
15. Tucker AM, Stern Y. Cognitive reserve in aging. *Current Alzheimer research* 2011;8(4):354-60. [published Online First: 2011/01/13]

- 1  
2 517 16. Stern Y. Cognitive reserve in ageing and Alzheimer's disease. *The Lancet Neurology*  
3 518 2012;11(11):1006-12. doi: 10.1016/s1474-4422(12)70191-6 [published Online First:  
4 519 2012/10/20]
- 5 520 17. Valenzuela MJ, Sachdev P. Brain reserve and dementia: a systematic review. *Psychological*  
6 521 *medicine* 2006;36(4):441-54. doi: 10.1017/s0033291705006264 [published Online First:  
7 522 2005/10/07]
- 8 523 18. Scarmeas N, Stern Y. Cognitive reserve: implications for diagnosis and prevention of Alzheimer's  
9 524 disease. *Current neurology and neuroscience reports* 2004;4(5):374-80. [published Online  
10 525 First: 2004/08/25]
- 11 526 19. Diamond MC, Rosenzweig MR, Bennett EL, et al. Effects of environmental enrichment and  
12 527 impoverishment on rat cerebral cortex. *Journal of neurobiology* 1972;3(1):47-64. doi:  
13 528 10.1002/neu.480030105 [published Online First: 1972/01/01]
- 14 529 20. Ngandu T, von Strauss E, Helkala EL, et al. Education and dementia: what lies behind the  
15 530 association? *Neurology* 2007;69(14):1442-50. doi: 10.1212/01.wnl.0000277456.29440.16  
16 531 [published Online First: 2007/10/03]
- 17 532 21. Marx J. Neuroscience. Preventing Alzheimer's: a lifelong commitment? *Science (New York, NY)*  
18 533 2005;309(5736):864-6. doi: 10.1126/science.309.5736.864 [published Online First:  
19 534 2005/08/06]
- 20 535 22. Fratiglioni L, Paillard-Borg S, Winblad B. An active and socially integrated lifestyle in late life might  
21 536 protect against dementia. *The Lancet Neurology* 2004;3(6):343-53. doi: 10.1016/s1474-  
22 537 4422(04)00767-7 [published Online First: 2004/05/26]
- 23 538 23. Katzman R, Terry R, DeTeresa R, et al. Clinical, pathological, and neurochemical changes in  
24 539 dementia: a subgroup with preserved mental status and numerous neocortical plaques.  
25 540 *Annals of neurology* 1988;23(2):138-44. doi: 10.1002/ana.410230206 [published Online First:  
26 541 1988/02/01]
- 27 542 24. UNESCO. International Standard Classification of Education (ISCED) 2011 2012 [Available from:  
28 543 <http://uis.unesco.org/en/glossary-term/adult-education> accessed Accessed 11 May 2017.
- 29 544 25. UNESCO. Continuing Education and New Directions Bangkok1993 [Available from:  
30 545 [http://www.unesco.org/education/pdf/413\\_48a.pdf](http://www.unesco.org/education/pdf/413_48a.pdf) accessed Accessed 11 May 2017.
- 31 546 26. Manninen J, Sgier I, Fleige M. Benefits of Lifelong Learning in Europe: Main Results of the BELL-  
32 547 Project, Research Report 2014 [Available from: [http://www.bell-project.eu/cms/wp-](http://www.bell-project.eu/cms/wp-content/uploads/2014/06/bell-research-report.pdf)  
33 548 [content/uploads/2014/06/bell-research-report.pdf](http://www.bell-project.eu/cms/wp-content/uploads/2014/06/bell-research-report.pdf) accessed 16 May 2017.
- 34 549 27. OECD. Learning opportunities for adults. Participation in adult education. Paris,1977:11.
- 35 550 28. Cedefop. Terminology of European education and training policy A selection of 100 key  
36 551 terms2008.
- 37 552 29. Kil M, Motschilnig R, Thöne-Geyer B. What Can Adult Education Accomplish? The Benefits of  
38 553 Adult Learning – The Approach, Measurement and Prospects 2013 [Available from:  
39 554 <https://www.die-bonn.de/doks/2013-benefits-en-01.pdf> accessed 16 May 2017.
- 40 555 30. Moher D, Liberati A, Tetzlaff J, et al. Reprint--preferred reporting items for systematic reviews  
41 556 and meta-analyses: the PRISMA statement. *Physical therapy* 2009;89(9):873-80. [published  
42 557 Online First: 2009/09/03]
- 43 558 31. Matyas N, Auer S, Gisinger C, et al. Continuing education for the prevention of mild cognitive  
44 559 impairment and Alzheimer's-type dementia: a systematic review protocol. *Systematic*  
45 560 *reviews* 2017;6(1):157. doi: 10.1186/s13643-017-0553-0 [published Online First: 2017/08/10]
- 46 561 32. Petersen R. C. Mild cognitive impairment as a diagnostic entity. *Journal of internal medicine*  
47 562 2004;256(3):183-94. doi: 10.1111/j.1365-2796.2004.01388.x [published Online First:  
48 563 2004/08/25]
- 49 564 33. McGowan J, Sampson M, Salzwedel DM, et al. PRESS Peer Review of Electronic Search Strategies:  
50 565 2015 Guideline Statement. *Journal of Clinical Epidemiology*;75:40-46. doi:  
51 566 10.1016/j.jclinepi.2016.01.021
- 52 567 34. Veritas Health Innovation M, Australia. Covidence systematic review software [Available from:  
53 568 [www.covidence.org](http://www.covidence.org).
- 54  
55  
56  
57  
58  
59  
60



- 1  
2 569 35. Sterne JA, Hernan MA, Reeves BC, et al. ROBINS-I: a tool for assessing risk of bias in non-  
3 570 randomised studies of interventions. *BMJ (Clinical research ed)* 2016;355:i4919. doi:  
4 571 10.1136/bmj.i4919 [published Online First: 2016/10/14]  
5 572 36. Shea BJ, Hamel C, Wells GA, et al. AMSTAR is a reliable and valid measurement tool to assess the  
6 573 methodological quality of systematic reviews. *J Clin Epidemiol* 2009;62(10):1013-20. doi:  
7 574 10.1016/j.jclinepi.2008.10.009 [published Online First: 2009/02/24]  
8 575 37. Balshem H, Helfand M, Schunemann HJ, et al. GRADE guidelines: 3. Rating the quality of evidence.  
9 576 *J Clin Epidemiol* 2011;64(4):401-6. doi: 10.1016/j.jclinepi.2010.07.015 [published Online First:  
10 577 2011/01/07]  
11 578 38. Thow ME, Summers MJ, Saunders NL, et al. Further education improves cognitive reserve and  
12 579 triggers improvement in selective cognitive functions in older adults: The Tasmanian Healthy  
13 580 Brain Project. *Alzheimer's & dementia (Amsterdam, Netherlands)* 2018;10:22-30. doi:  
14 581 10.1016/j.dadm.2017.08.004 [published Online First: 2017/10/17]  
15 582 39. Lenehan ME, Summers MJ, Saunders NL, et al. Sending your grandparents to university increases  
16 583 cognitive reserve: The Tasmanian Healthy Brain Project. *Neuropsychology* 2016;30(5):525-31.  
17 584 doi: 10.1037/neu0000249 [published Online First: 2015/11/17]  
18 585 40. Di Marco LY, Marzo A, Munoz-Ruiz M, et al. Modifiable lifestyle factors in dementia: a systematic  
19 586 review of longitudinal observational cohort studies. *Journal of Alzheimer's disease : JAD*  
20 587 2014;42(1):119-35. doi: 10.3233/jad-132225 [published Online First: 2014/05/07]  
21 588 41. Opdebeeck C, Martyr A, Clare L. Cognitive reserve and cognitive function in healthy older people:  
22 589 a meta-analysis. *Neuropsychology, development, and cognition Section B, Aging,*  
23 590 *neuropsychology and cognition* 2016;23(1):40-60. doi: 10.1080/13825585.2015.1041450  
24 591 [published Online First: 2015/05/02]  
25 592 42. Sajeev G, Weuve J, Jackson JW, et al. Late-life Cognitive Activity and Dementia: A Systematic  
26 593 Review and Bias Analysis. *Epidemiology (Cambridge, Mass)* 2016;27(5):732-42. doi:  
27 594 10.1097/ede.0000000000000513 [published Online First: 2016/05/27]  
28 595 43. Toril P, Reales JM, Ballesteros S. Video game training enhances cognition of older adults: a meta-  
29 596 analytic study. *Psychology and aging* 2014;29(3):706-16. doi: 10.1037/a0037507 [published  
30 597 Online First: 2014/09/23]  
31 598 44. Yates LA, Ziser S, Spector A, et al. Cognitive leisure activities and future risk of cognitive  
32 599 impairment and dementia: systematic review and meta-analysis. *International*  
33 600 *psychogeriatrics* 2016;28(11):1791-806. doi: 10.1017/s1041610216001137 [published Online  
34 601 First: 2016/08/10]  
35 602 45. Summers MJ, Saunders NL, Valenzuela MJ, et al. The Tasmanian Healthy Brain Project (THBP): a  
36 603 prospective longitudinal examination of the effect of university-level education in older  
37 604 adults in preventing age-related cognitive decline and reducing the risk of dementia.  
38 605 *International psychogeriatrics* 2013;25(7):1145-55. doi: 10.1017/s1041610213000380  
39 606 [published Online First: 2013/03/26]  
40 607 46. Ward DD, Summers MJ, Saunders NL, et al. Modeling cognitive reserve in healthy middle-aged  
41 608 and older adults: the Tasmanian Healthy Brain Project. *International psychogeriatrics*  
42 609 2015;27(4):579-89. doi: 10.1017/s1041610214002075 [published Online First: 2014/09/24]  
43 610 47. Akbaraly TN, Portet F, Fustini S, et al. Leisure activities and the risk of dementia in the elderly:  
44 611 results from the Three-City Study. *Neurology* 2009;73(11):854-61. doi:  
45 612 10.1212/WNL.0b013e3181b7849b [published Online First: 2009/09/16]  
46 613 48. Verghese J, Lipton RB, Katz MJ, et al. Leisure activities and the risk of dementia in the elderly. *The*  
47 614 *New England journal of medicine* 2003;348(25):2508-16. doi: 10.1056/NEJMoa022252  
48 615 [published Online First: 2003/06/20]  
49 616 49. Pascual-Leone A, Amedi A, Fregni F, et al. The plastic human brain cortex. *Annual review of*  
50 617 *neuroscience* 2005;28:377-401. doi: 10.1146/annurev.neuro.27.070203.144216 [published  
51 618 Online First: 2005/07/19]  
52 619 50. Knaepen K, Goekint M, Heyman EM, et al. Neuroplasticity - exercise-induced response of  
53 620 peripheral brain-derived neurotrophic factor: a systematic review of experimental studies in

- 1  
2 621 human subjects. *Sports medicine (Auckland, NZ)* 2010;40(9):765-801. doi:  
3 622 10.2165/11534530-000000000-00000 [published Online First: 2010/08/24]  
4 623 51. Vance DE, Roberson AJ, McGuinness TM, et al. How neuroplasticity and cognitive reserve protect  
5 624 cognitive functioning. *Journal of psychosocial nursing and mental health services*  
6 625 2010;48(4):23-30. doi: 10.3928/02793695-20100302-01 [published Online First: 2010/03/31]  
7 626 52. Norton S, Matthews FE, Barnes DE, et al. Potential for primary prevention of Alzheimer's disease:  
8 627 an analysis of population-based data. *The Lancet Neurology* 2014;13(8):788-94. doi:  
9 628 10.1016/s1474-4422(14)70136-x [published Online First: 2014/07/18]  
10 629 53. Ngandu T, Lehtisalo J, Solomon A, et al. A 2 year multidomain intervention of diet, exercise,  
11 630 cognitive training, and vascular risk monitoring versus control to prevent cognitive decline in  
12 631 at-risk elderly people (FINGER): a randomised controlled trial. *Lancet (London, England)*  
13 632 2015;385(9984):2255-63. doi: 10.1016/s0140-6736(15)60461-5 [published Online First:  
14 633 2015/03/17]  
15  
16  
17  
18  
19  
20  
21  
22  
23  
24  
25  
26  
27  
28  
29  
30  
31  
32  
33  
34  
35  
36  
37  
38  
39  
40  
41  
42  
43  
44  
45  
46  
47  
48  
49  
50  
51  
52  
53  
54  
55  
56  
57  
58  
59  
60

634

For peer review only

1  
2  
3  
4  
5  
6  
7  
8  
9  
10  
11  
12  
13  
14  
15  
16  
17  
18  
19  
20  
21  
22  
23  
24  
25  
26  
27  
28  
29  
30  
31  
32  
33  
34  
35  
36  
37  
38  
39  
40  
41  
42  
43  
44  
45  
46

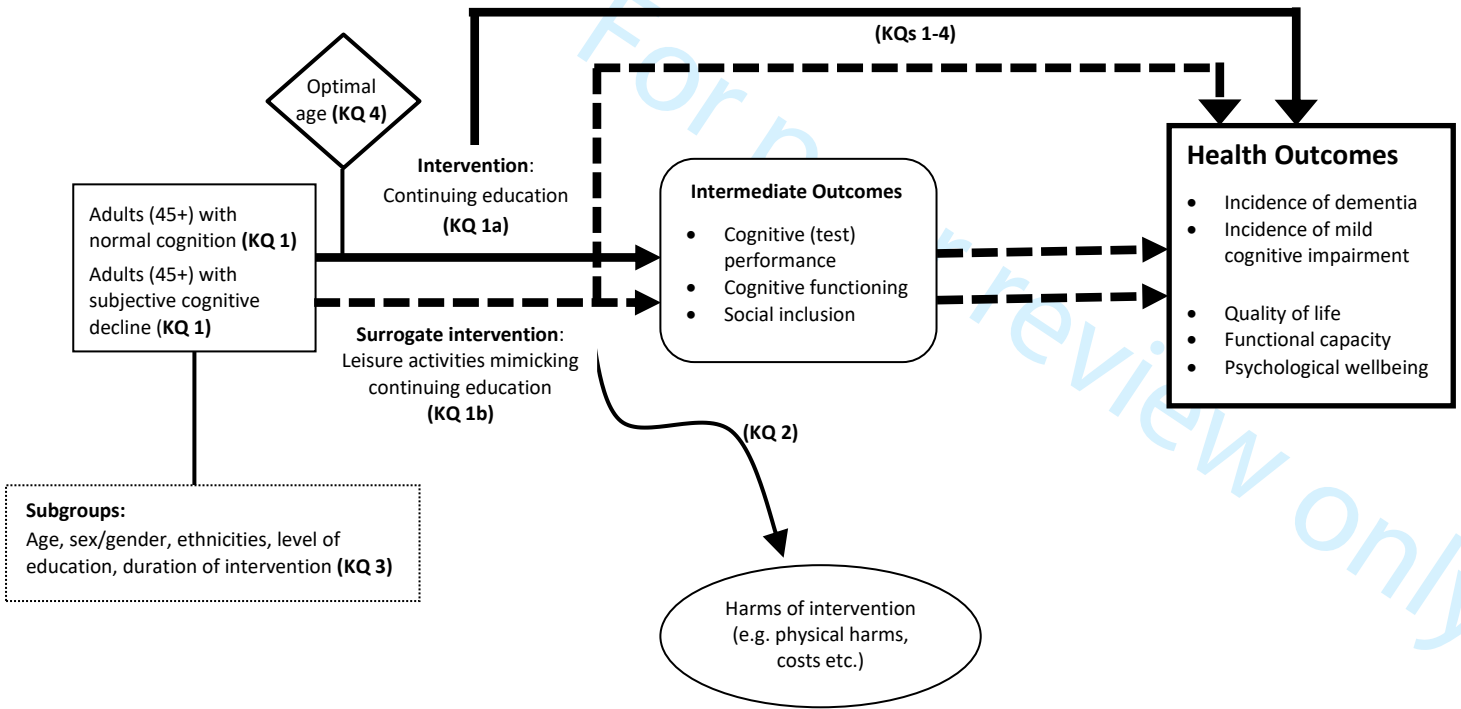

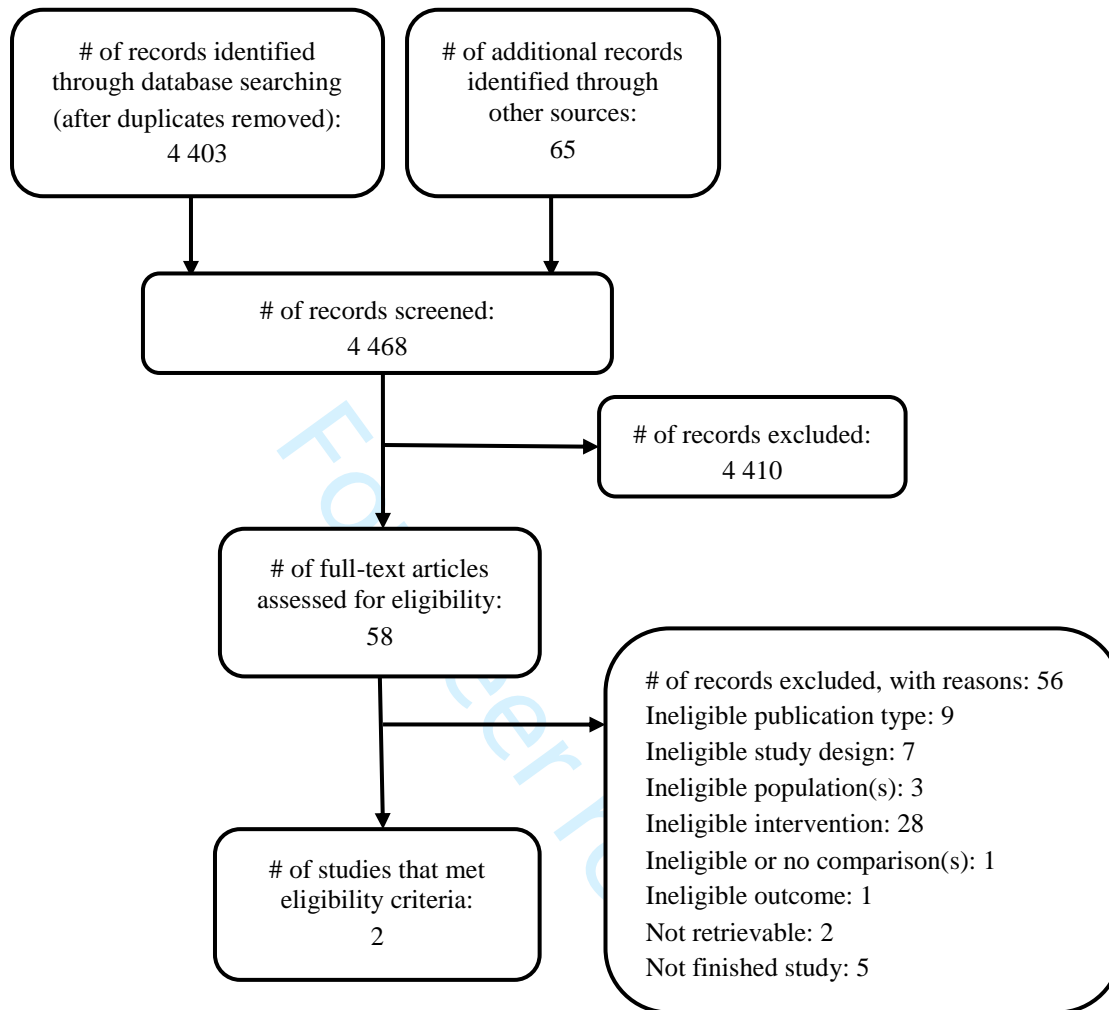

1  
2  
3  
4  
5  
6  
7  
8  
9  
10  
11  
12  
13  
14  
15  
16  
17  
18  
19  
20  
21  
22  
23  
24  
25  
26  
27  
28  
29  
30  
31  
32  
33  
34  
35  
36  
37  
38  
39  
40  
41  
42  
43  
44  
45  
46  
47  
48  
49  
50  
51  
52  
53  
54  
55  
56  
57  
58  
59  
60

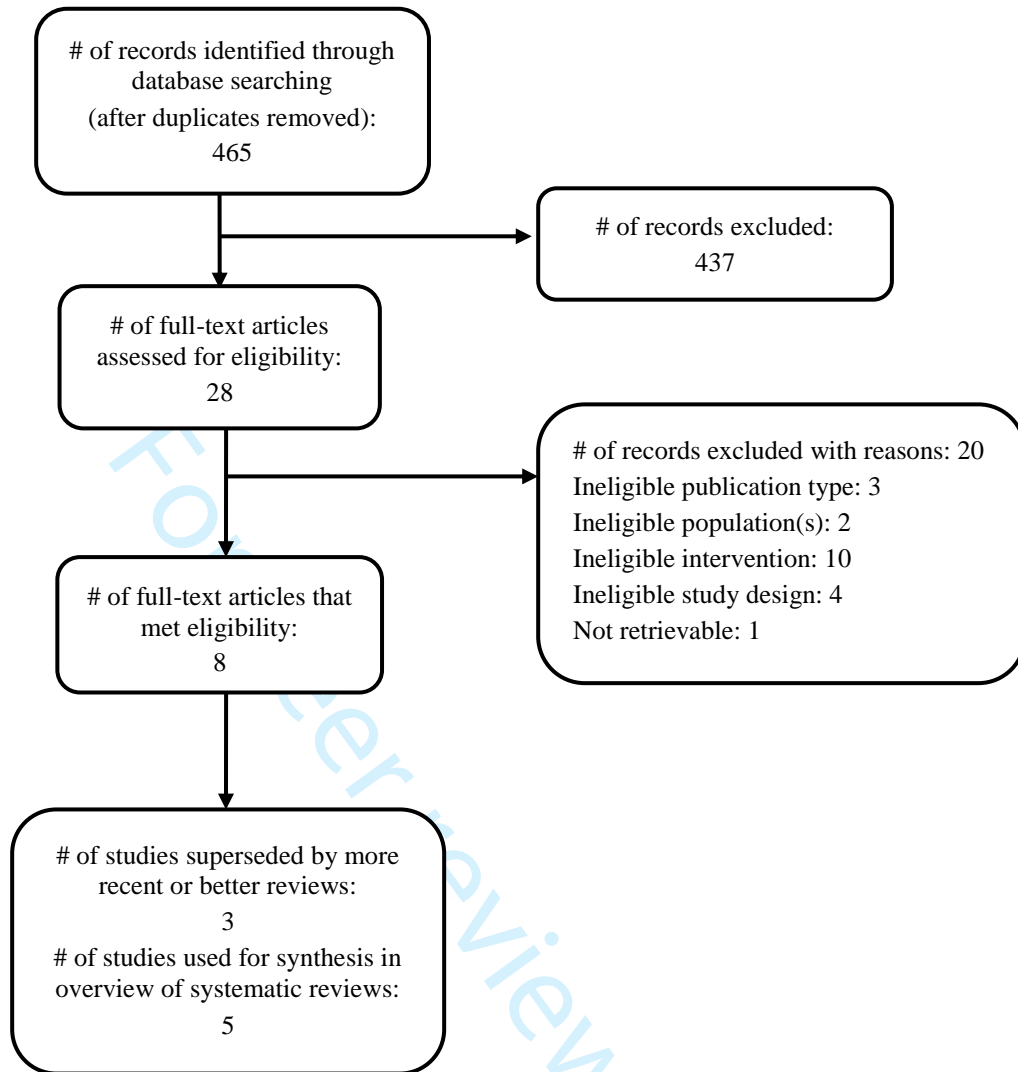

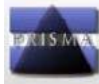

# PRISMA 2009 Checklist

| Section/topic                      | #  | Checklist item                                                                                                                                                                                                                                                                                              | Reported on page #         |
|------------------------------------|----|-------------------------------------------------------------------------------------------------------------------------------------------------------------------------------------------------------------------------------------------------------------------------------------------------------------|----------------------------|
| <b>TITLE</b>                       |    |                                                                                                                                                                                                                                                                                                             |                            |
| Title                              | 1  | Identify the report as a systematic review, meta-analysis, or both.                                                                                                                                                                                                                                         | Page 1 (line 1-3)          |
| <b>ABSTRACT</b>                    |    |                                                                                                                                                                                                                                                                                                             |                            |
| Structured summary                 | 2  | Provide a structured summary including, as applicable: background; objectives; data sources; study eligibility criteria, participants, and interventions; study appraisal and synthesis methods; results; limitations; conclusions and implications of key findings; systematic review registration number. | Page 3-4 (line 40-67)      |
| <b>INTRODUCTION</b>                |    |                                                                                                                                                                                                                                                                                                             |                            |
| Rationale                          | 3  | Describe the rationale for the review in the context of what is already known.                                                                                                                                                                                                                              | Page 5-7 (line 127-132)    |
| Objectives                         | 4  | Provide an explicit statement of questions being addressed with reference to participants, interventions, comparisons, outcomes, and study design (PICOS).                                                                                                                                                  | Page 7 (line 133-144)      |
| <b>METHODS</b>                     |    |                                                                                                                                                                                                                                                                                                             |                            |
| Protocol and registration          | 5  | Indicate if a review protocol exists, if and where it can be accessed (e.g., Web address), and, if available, provide registration information including registration number.                                                                                                                               | Page 7 (line 149-151)      |
| Eligibility criteria               | 6  | Specify study characteristics (e.g., PICOS, length of follow-up) and report characteristics (e.g., years considered, language, publication status) used as criteria for eligibility, giving rationale.                                                                                                      | Page 8-9 (line 171-196)    |
| Information sources                | 7  | Describe all information sources (e.g., databases with dates of coverage, contact with study authors to identify additional studies) in the search and date last searched.                                                                                                                                  | Page 9-10 (line 197-214)   |
| Search                             | 8  | Present full electronic search strategy for at least one database, including any limits used, such that it could be repeated.                                                                                                                                                                               | Supplementary file 3 and 4 |
| Study selection                    | 9  | State the process for selecting studies (i.e., screening, eligibility, included in systematic review, and, if applicable, included in the meta-analysis).                                                                                                                                                   | Page 10 (line 215-218)     |
| Data collection process            | 10 | Describe method of data extraction from reports (e.g., piloted forms, independently, in duplicate) and any processes for obtaining and confirming data from investigators.                                                                                                                                  | Page 10 (line 219-226)     |
| Data items                         | 11 | List and define all variables for which data were sought (e.g., PICOS, funding sources) and any assumptions and simplifications made.                                                                                                                                                                       | Page 10 (line 222-226)     |
| Risk of bias in individual studies | 12 | Describe methods used for assessing risk of bias of individual studies (including specification of whether this was done at the study or outcome level), and how this information is to be used in any data synthesis.                                                                                      | Page 10-11 (line 227-233)  |
| Summary measures                   | 13 | State the principal summary measures (e.g., risk ratio, difference in means).                                                                                                                                                                                                                               | Page 11 (line 234-240)     |

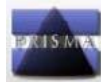

# PRISMA 2009 Checklist

1  
2  
3  
4  
5  
6  
7  
8  
9  
10  
11  
12  
13  
14  
15  
16  
17  
18  
19  
20  
21  
22  
23  
24  
25  
26  
27  
28  
29  
30  
31  
32  
33  
34  
35  
36  
37  
38  
39  
40  
41  
42  
43  
44  
45  
46  
47

|                      |    |                                                                                                                                                           |                        |
|----------------------|----|-----------------------------------------------------------------------------------------------------------------------------------------------------------|------------------------|
| Synthesis of results | 14 | Describe the methods of handling data and combining results of studies, if done, including measures of consistency (e.g., $I^2$ ) for each meta-analysis. | Page 11 (line 234-240) |
|----------------------|----|-----------------------------------------------------------------------------------------------------------------------------------------------------------|------------------------|

Page 1 of 2

| Section/topic                 | #  | Checklist item                                                                                                                                                                                           | Reported on page #                                           |
|-------------------------------|----|----------------------------------------------------------------------------------------------------------------------------------------------------------------------------------------------------------|--------------------------------------------------------------|
| Risk of bias across studies   | 15 | Specify any assessment of risk of bias that may affect the cumulative evidence (e.g., publication bias, selective reporting within studies).                                                             | NA                                                           |
| Additional analyses           | 16 | Describe methods of additional analyses (e.g., sensitivity or subgroup analyses, meta-regression), if done, indicating which were pre-specified.                                                         | NA                                                           |
| <b>RESULTS</b>                |    |                                                                                                                                                                                                          |                                                              |
| Study selection               | 17 | Give numbers of studies screened, assessed for eligibility, and included in the review, with reasons for exclusions at each stage, ideally with a flow diagram.                                          | Page 11 (line 238-243)<br>Figure 2 and figure 3              |
| Study characteristics         | 18 | For each study, present characteristics for which data were extracted (e.g., study size, PICOS, follow-up period) and provide the citations.                                                             | Page 11-12 (line 255-278)<br>Table 1 and table 2             |
| Risk of bias within studies   | 19 | Present data on risk of bias of each study and, if available, any outcome level assessment (see item 12).                                                                                                | Page 13-14<br>Table 1 and table 2                            |
| Results of individual studies | 20 | For all outcomes considered (benefits or harms), present, for each study: (a) simple summary data for each intervention group (b) effect estimates and confidence intervals, ideally with a forest plot. | Page 13-17 (line 288-351)<br>Table 1 and table 2             |
| Synthesis of results          | 21 | Present results of each meta-analysis done, including confidence intervals and measures of consistency.                                                                                                  | NA                                                           |
| Risk of bias across studies   | 22 | Present results of any assessment of risk of bias across studies (see Item 15).                                                                                                                          | Page 12 (line 264-266; line 273-278)<br>Supplementary file 5 |
| Additional analysis           | 23 | Give results of additional analyses, if done (e.g., sensitivity or subgroup analyses, meta-regression [see Item 16]).                                                                                    | NA                                                           |
| <b>DISCUSSION</b>             |    |                                                                                                                                                                                                          |                                                              |
| Summary of evidence           | 24 | Summarize the main findings including the strength of evidence for each main outcome; consider their relevance to key groups (e.g., healthcare providers, users, and policy makers).                     | Page 18                                                      |

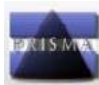

# PRISMA 2009 Checklist

|                |    |                                                                                                                                                               |                        |
|----------------|----|---------------------------------------------------------------------------------------------------------------------------------------------------------------|------------------------|
| Limitations    | 25 | Discuss limitations at study and outcome level (e.g., risk of bias), and at review-level (e.g., incomplete retrieval of identified research, reporting bias). | Page 19                |
| Conclusions    | 26 | Provide a general interpretation of the results in the context of other evidence, and implications for future research.                                       | Page 20                |
| <b>FUNDING</b> |    |                                                                                                                                                               |                        |
| Funding        | 27 | Describe sources of funding for the systematic review and other support (e.g., supply of data); role of funders for the systematic review.                    | Page 21 (line 423-425) |

From: Moher D, Liberati A, Tetzlaff J, Altman DG, The PRISMA Group (2009). Preferred Reporting Items for Systematic Reviews and Meta-Analyses: The PRISMA Statement. PLoS Med 6(6): e1000097. doi:10.1371/journal.pmed1000097

For more information, visit: [www.prisma-statement.org](http://www.prisma-statement.org).

Page 2 of 2



## Supplementary File 2: Inclusion and exclusion criteria

| Criteria              |                                                                                                                                                                                                                                                                                                                                                                                                                          |                                                                                                                                                                                                                                                                                                                                                                                                                                        |
|-----------------------|--------------------------------------------------------------------------------------------------------------------------------------------------------------------------------------------------------------------------------------------------------------------------------------------------------------------------------------------------------------------------------------------------------------------------|----------------------------------------------------------------------------------------------------------------------------------------------------------------------------------------------------------------------------------------------------------------------------------------------------------------------------------------------------------------------------------------------------------------------------------------|
| Category              | Inclusion                                                                                                                                                                                                                                                                                                                                                                                                                | Exclusion                                                                                                                                                                                                                                                                                                                                                                                                                              |
| Population            | - Adults (45 years or older) without a clinical diagnosis of cognitive impairment; this includes people with subjective cognitive impairment                                                                                                                                                                                                                                                                             | - People younger than 45 years<br>- People with a clinical diagnosis of impaired cognition (e.g., MMSE < 24)<br>- Populations comprised exclusively of patients with primary diseases with an increased risk for dementia such as Parkinson disease, HIV infection, multiple sclerosis, stroke, post traumatic brain injuries, infectious diseases, psychiatric conditions (e.g. alcohol abuse, drug abuse, major depressive disorder) |
| Subgroups             | - Age<br>- Sex/gender<br>- Race/ethnicity<br>- Level of education<br>- Duration of intervention                                                                                                                                                                                                                                                                                                                          |                                                                                                                                                                                                                                                                                                                                                                                                                                        |
| Geography             | No limit                                                                                                                                                                                                                                                                                                                                                                                                                 | No limit                                                                                                                                                                                                                                                                                                                                                                                                                               |
| Date of search        | Searches will go back until 1990                                                                                                                                                                                                                                                                                                                                                                                         |                                                                                                                                                                                                                                                                                                                                                                                                                                        |
| Settings              | Community-dwelling adults                                                                                                                                                                                                                                                                                                                                                                                                | Institutionalized people, e.g., people in nursing homes                                                                                                                                                                                                                                                                                                                                                                                |
| Interventions         | <b>For systematic review</b><br>- all cognitive activities that are provided by formal and non-formal educational institutions<br>- classes/courses/trainings that are based on individual interests and that are attended voluntarily<br><br><b>For overview of systematic reviews</b><br>Leisure activities that are cognitively stimulating and mimic the content of continuing education but in an informal setting. | Formal (vocational) education and training; physical activities, topics and courses that are related to any special job position and/or occupation                                                                                                                                                                                                                                                                                     |
| Control Interventions | No continuing education                                                                                                                                                                                                                                                                                                                                                                                                  | Any educational activities, physical activities                                                                                                                                                                                                                                                                                                                                                                                        |
| Outcomes              | <b>Health Outcomes</b><br>- Incidence of dementia<br>- Incidence of MCI<br>- Psychological wellbeing<br>- Functional capacity<br>- Quality of life<br>- Other relevant health outcomes<br><br><b>Intermediate Outcomes</b><br>- Cognitive functioning<br>- Cognitive (test) performance<br>- Social inclusion                                                                                                            |                                                                                                                                                                                                                                                                                                                                                                                                                                        |
| Timing                | Minimum duration of the intervention: 3 months<br>Minimum follow up time: 1 year                                                                                                                                                                                                                                                                                                                                         |                                                                                                                                                                                                                                                                                                                                                                                                                                        |
| Publication language  | No language restrictions                                                                                                                                                                                                                                                                                                                                                                                                 |                                                                                                                                                                                                                                                                                                                                                                                                                                        |
| Study design          | <b>For systematic reviews</b><br>- RCTs<br>- Nonrandomized controlled trials<br>- Prospective controlled cohort studies<br>- Retrospective controlled cohort studies<br>- Case-control studies<br>- Nonrandomized studies must have a minimum sample size of 300 or more participants<br><br><b>For overview of systematic reviews</b><br>-systematic reviews and meta-analyses                                          | - Case series<br>- Case reports<br>- Cross over trials<br>- Nonsystematic reviews<br>- Studies without a control group<br>- Nonrandomized studies with fewer than 300 participants                                                                                                                                                                                                                                                     |

### Supplementary file 3: Search Strategies of Systematic Review, by database

#### Medline (via PubMed):10 July 2017

| Medline |                                                                                                                                                                                                                        |         |
|---------|------------------------------------------------------------------------------------------------------------------------------------------------------------------------------------------------------------------------|---------|
| Search  | Query                                                                                                                                                                                                                  | Hits    |
| 1       | Dementia/ or exp Alzheimer Disease/                                                                                                                                                                                    | 117464  |
| 2       | Cognitive Dysfunction/                                                                                                                                                                                                 | 5918    |
| 3       | Cognition/                                                                                                                                                                                                             | 81481   |
| 4       | (dementia or alzheimer*).ti,ab.                                                                                                                                                                                        | 174908  |
| 5       | ((cognit* or memory or mental) adj3 (impair* or decline* or deficit* or reduc* or function*)).ti,ab.                                                                                                                   | 166793  |
| 6       | or/1-5                                                                                                                                                                                                                 | 370522  |
| 7       | Primary Prevention/                                                                                                                                                                                                    | 16883   |
| 8       | prevent*.ti,ab.                                                                                                                                                                                                        | 1207345 |
| 9       | (protect* or reduc* or delay* or improv*).ti.                                                                                                                                                                          | 710454  |
| 10      | or/7-9                                                                                                                                                                                                                 | 1858549 |
| 11      | 6 and 10                                                                                                                                                                                                               | 39070   |
| 12      | Dementia/pc or exp Alzheimer Disease/pc or Cognitive Dysfunction/pc [Prevention & Control]                                                                                                                             | 4039    |
| 13      | 11 or 12                                                                                                                                                                                                               | 41057   |
| 14      | exp Education, Continuing/                                                                                                                                                                                             | 60977   |
| 15      | ((continuing or adult) adj2 (education or training)).af.                                                                                                                                                               | 80639   |
| 16      | (lifelong learning or life-long learning).af.                                                                                                                                                                          | 2396    |
| 17      | education/ or exp curriculum/ or exp education, distance/ or exp education, nonprofessional/ or exp educational measurement/ or exp international educational exchange/ or mentoring/ or exp schools/ or exp teaching/ | 500562  |
| 18      | Learning/                                                                                                                                                                                                              | 56308   |
| 19      | Students/                                                                                                                                                                                                              | 47445   |
| 20      | exp Educational Status/                                                                                                                                                                                                | 47641   |
| 21      | (learn* or class or classes or course? or educat* or school* or train* or seminar* or tutor*).ti.                                                                                                                      | 569072  |
| 22      | education.fs. not exp Health Personnel/ed                                                                                                                                                                              | 200448  |
| 23      | (cognitiv* adj2 (stimulat* or activit*)).ti.                                                                                                                                                                           | 742     |
| 24      | or/14-23                                                                                                                                                                                                               | 1075912 |
| 25      | 13 and 24                                                                                                                                                                                                              | 3357    |
| 26      | exp Dementia/dt [Drug Therapy]                                                                                                                                                                                         | 17955   |
| 27      | 25 not 26                                                                                                                                                                                                              | 3243    |
| 28      | exp animals/ not exp humans/                                                                                                                                                                                           | 4438320 |
| 29      | 27 not 28                                                                                                                                                                                                              | 2497    |
| 30      | exp age groups/ not (exp aged/ or middle aged/)                                                                                                                                                                        | 3709828 |
| 31      | 29 not 30                                                                                                                                                                                                              | 1838    |
| 32      | limit 31 to yr="1990 -Current"                                                                                                                                                                                         | 1805    |
| 33      | remove duplicates from 32                                                                                                                                                                                              | 1695    |

**Medline (via PubMed): updated 5 April 2018**

| Search | Query                                                                                                                                                                                                                  | Results |
|--------|------------------------------------------------------------------------------------------------------------------------------------------------------------------------------------------------------------------------|---------|
| 1      | Dementia/ or exp Alzheimer Disease/                                                                                                                                                                                    | 118649  |
| 2      | Cognitive Dysfunction/                                                                                                                                                                                                 | 7920    |
| 3      | Cognition/                                                                                                                                                                                                             | 82659   |
| 4      | (dementia or alzheimer*).ti,ab.                                                                                                                                                                                        | 178991  |
| 5      | ((cognit* or memory or mental) adj3 (impair* or decline* or deficit* or reduc* or function*)).ti,ab.                                                                                                                   | 171636  |
| 6      | or/1-5                                                                                                                                                                                                                 | 378202  |
| 7      | Primary Prevention/                                                                                                                                                                                                    | 16649   |
| 8      | prevent*.ti,ab.                                                                                                                                                                                                        | 1222908 |
| 9      | (protect* or reduc* or delay* or improv* or increas* or decreas*).ti.                                                                                                                                                  | 1008130 |
| 10     | or/7-9                                                                                                                                                                                                                 | 2152629 |
| 11     | 6 and 10                                                                                                                                                                                                               | 46477   |
| 12     | Dementia/pc or exp Alzheimer Disease/pc or Cognitive Dysfunction/pc or Cognition Disorders/pc [Prevention & Control]                                                                                                   | 6391    |
| 13     | Cognitive Reserve/                                                                                                                                                                                                     | 388     |
| 14     | cognitive reserve.ti,ab.                                                                                                                                                                                               | 949     |
| 15     | or/11-14                                                                                                                                                                                                               | 50722   |
| 16     | exp Education, Continuing/                                                                                                                                                                                             | 58777   |
| 17     | ((continuing or adult) adj2 (education or training)).af.                                                                                                                                                               | 77985   |
| 18     | (lifelong learning or life-long learning).af.                                                                                                                                                                          | 2438    |
| 19     | education/ or exp curriculum/ or exp education, distance/ or exp education, nonprofessional/ or exp educational measurement/ or exp international educational exchange/ or mentoring/ or exp schools/ or exp teaching/ | 561833  |
| 20     | Learning/                                                                                                                                                                                                              | 57102   |
| 21     | Students/                                                                                                                                                                                                              | 48337   |
| 22     | exp Educational Status/                                                                                                                                                                                                | 47241   |
| 23     | (learn* or class or classes or course? or educat* or school* or train* or seminar* or tutor*).ti.                                                                                                                      | 571948  |
| 24     | education.fs. not exp Health Personnel/ed                                                                                                                                                                              | 199668  |
| 25     | (cognitiv* adj2 (stimulat* or activit*)).ti.                                                                                                                                                                           | 773     |
| 26     | (late-life adj2 (activity or activities or learn* or school* or educat* or training)).ti,ab.                                                                                                                           | 93      |
| 27     | or/16-26                                                                                                                                                                                                               | 1135186 |
| 28     | 15 and 27                                                                                                                                                                                                              | 4360    |
| 29     | exp Dementia/dt [Drug Therapy]                                                                                                                                                                                         | 18096   |
| 30     | 28 not 29                                                                                                                                                                                                              | 4227    |
| 31     | exp animals/ not exp humans/                                                                                                                                                                                           | 4439627 |
| 32     | 30 not 31                                                                                                                                                                                                              | 3347    |
| 33     | exp age groups/ not (exp aged/ or middle aged/)                                                                                                                                                                        | 3685655 |
| 34     | 32 not 33                                                                                                                                                                                                              | 2546    |
| 35     | (201707* or 201708* or 201709* or 20171* or 2018*).ed.                                                                                                                                                                 | 749049  |
| 36     | ("2017/07*" or "2017/08*" or "2017/09*" or "2017/1*" or 2018*).dt.                                                                                                                                                     | 942206  |
| 37     | 35 or 36                                                                                                                                                                                                               | 1540516 |
| 38     | 34 and 37                                                                                                                                                                                                              | 364     |
| 39     | limit 34 to yr="2017 -Current"                                                                                                                                                                                         | 348     |
| 40     | 38 or 39                                                                                                                                                                                                               | 435     |

## Cochrane Library (10 July 2017)

| Cochrane Library |                                                                                                                                                                                                                                          |        |
|------------------|------------------------------------------------------------------------------------------------------------------------------------------------------------------------------------------------------------------------------------------|--------|
| Search           | Query                                                                                                                                                                                                                                    | Hits   |
| #1               | [mh ^Dementia] or [mh "Alzheimer Disease"]                                                                                                                                                                                               | 4053   |
| #2               | [mh ^"Cognitive Dysfunction"]                                                                                                                                                                                                            | 0      |
| #3               | [mh ^Cognition]                                                                                                                                                                                                                          | 6276   |
| #4               | (dementia or alzheimer*):ti,ab,kw                                                                                                                                                                                                        | 11882  |
| #5               | ((cognit* or memory or mental) near/3 (impair* or decline* or deficit* or reduc* or function*)):ti,ab                                                                                                                                    | 16173  |
| #6               | {or #1-#5}                                                                                                                                                                                                                               | 27711  |
| #7               | [mh ^"Primary Prevention"]                                                                                                                                                                                                               | 1008   |
| #8               | prevent*:ti,ab,kw                                                                                                                                                                                                                        | 107750 |
| #9               | (protect* or reduc* or delay* or improv*):ti                                                                                                                                                                                             | 77161  |
| #10              | {or #7-#9}                                                                                                                                                                                                                               | 175365 |
| #11              | #6 and #10                                                                                                                                                                                                                               | 4432   |
| #12              | [mh Dementia/pc] or [mh ^"Cognitive Dysfunction"/pc]                                                                                                                                                                                     | 208    |
| #13              | #11 or #12                                                                                                                                                                                                                               | 4532   |
| #14              | [mh "Education, Continuing"]                                                                                                                                                                                                             | 1168   |
| #15              | ((continuing or adult) near/2 (education or training)):ti,ab,kw                                                                                                                                                                          | 2819   |
| #16              | ("lifelong learning" or "life-long learning"):ti,ab,kw                                                                                                                                                                                   | 19     |
| #17              | [mh ^education] or [mh curriculum] or [mh "education, distance"] or [mh "education, nonprofessional"] or [mh "educational measurement"] or [mh "international educational exchange"] or [mh ^mentoring] or [mh schools] or [mh teaching] | 21839  |
| #18              | [mh ^Learning]                                                                                                                                                                                                                           | 1809   |
| #19              | [mh ^Students]                                                                                                                                                                                                                           | 2041   |
| #20              | [mh "Educational Status"]                                                                                                                                                                                                                | 1348   |
| #21              | (learn* or class or classes or course or courses or educat* or school* or train* or seminar* or tutor*):ti                                                                                                                               | 45060  |
| #22              | (cognitiv* near/2 (stimulat* or activit*)):ti                                                                                                                                                                                            | 212    |
| #23              | (learning or ((education or training) near/2 (nonprofessional or non-professional or distance)) or teaching):kw                                                                                                                          | 12784  |
| #24              | {or #14-#23}                                                                                                                                                                                                                             | 67085  |
| #25              | #13 and #24                                                                                                                                                                                                                              | 784    |
| #26              | [mh "age groups"] not ([mh aged] or [mh "middle aged"])                                                                                                                                                                                  | 104635 |
| #27              | #25 not #26                                                                                                                                                                                                                              | 691    |
| #28              | #27 Publication Year from 1990 to 2017                                                                                                                                                                                                   | 691    |

## Cochrane Library (updated 9 April 2018)

| ID  | Search                                                                                                                                                                                                                                   | Hits   |
|-----|------------------------------------------------------------------------------------------------------------------------------------------------------------------------------------------------------------------------------------------|--------|
| #1  | [mh ^Dementia] or [mh "Alzheimer Disease"]                                                                                                                                                                                               | 4263   |
| #2  | [mh ^"Cognitive Dysfunction"]                                                                                                                                                                                                            | 450    |
| #3  | [mh ^Cognition]                                                                                                                                                                                                                          | 6675   |
| #4  | (dementia or alzheimer*):ti,ab,kw                                                                                                                                                                                                        | 13099  |
| #5  | ((cognit* or memory or mental) near/3 (impair* or decline* or deficit* or reduc* or function*)):ti,ab                                                                                                                                    | 18089  |
| #6  | {or #1-#5}                                                                                                                                                                                                                               | 30564  |
| #7  | [mh ^"Primary Prevention"]                                                                                                                                                                                                               | 1065   |
| #8  | prevent*:ti,ab,kw                                                                                                                                                                                                                        | 115159 |
| #9  | (protect* or reduc* or delay* or improv* or increas* or decreas*):ti                                                                                                                                                                     | 102653 |
| #10 | {or #7-#9}                                                                                                                                                                                                                               | 205354 |
| #11 | #6 and #10                                                                                                                                                                                                                               | 5434   |
| #12 | [mh Dementia/pc] or [mh ^"Cognitive Dysfunction"/pc] or [mh ^"Cognition Disorders"/pc]                                                                                                                                                   | 603    |
| #13 | [mh ^"Cognitive Reserve"]                                                                                                                                                                                                                | 8      |
| #14 | cognitive reserve:ti,ab,kw                                                                                                                                                                                                               | 51     |
| #15 | {or #11-#14}                                                                                                                                                                                                                             | 5791   |
| #16 | [mh "Education, Continuing"]                                                                                                                                                                                                             | 1209   |
| #17 | ((continuing or adult) near/2 (education or training)):ti,ab,kw                                                                                                                                                                          | 3051   |
| #18 | ("lifelong learning" or "life-long learning"):ti,ab,kw                                                                                                                                                                                   | 21     |
| #19 | [mh ^education] or [mh curriculum] or [mh "education, distance"] or [mh "education, nonprofessional"] or [mh "educational measurement"] or [mh "international educational exchange"] or [mh ^mentoring] or [mh schools] or [mh teaching] | 26602  |
| #20 | [mh ^Learning]                                                                                                                                                                                                                           | 1962   |
| #21 | [mh ^Students]                                                                                                                                                                                                                           | 2250   |
| #22 | [mh "Educational Status"]                                                                                                                                                                                                                | 1407   |
| #23 | (learn* or class or classes or course or courses or educat* or school* or train* or seminar* or tutor*):ti                                                                                                                               | 48313  |
| #24 | (cognitiv* near/2 (stimulat* or activit*)):ti                                                                                                                                                                                            | 246    |
| #25 | (learning or ((education or training) near/2 (nonprofessional or non-professional or distance)) or teaching):kw                                                                                                                          | 14622  |
| #26 | (late-life near/2 (activity or activities or learn* or school* or educat* or training)):ti,ab,kw                                                                                                                                         | 8      |
| #27 | {or #16-#26}                                                                                                                                                                                                                             | 75572  |
| #28 | #15 and #27                                                                                                                                                                                                                              | 1055   |
| #29 | [mh "age groups"] not ([mh aged] or [mh "middle aged"])                                                                                                                                                                                  | 109483 |
| #30 | #28 not #29                                                                                                                                                                                                                              | 937    |
| #31 | #30 Publication Year from 2017 to 2018                                                                                                                                                                                                   | 106    |

## Embase (10 July 2017)

| Embase |                                                                                                                                                                                                                                 |         |
|--------|---------------------------------------------------------------------------------------------------------------------------------------------------------------------------------------------------------------------------------|---------|
| Search | Query                                                                                                                                                                                                                           | Hits    |
| #1     | 'dementia'/de                                                                                                                                                                                                                   | 97110   |
| #2     | 'alzheimer disease'/exp                                                                                                                                                                                                         | 156558  |
| #3     | 'mild cognitive impairment'/exp                                                                                                                                                                                                 | 17067   |
| #4     | dementia:ti,ab OR alzheimer*:ti,ab                                                                                                                                                                                              | 226442  |
| #5     | ((cognit* OR memory OR mental) NEAR/3 (impair* OR decline* OR deficit* OR reduc* OR function*)):ti,ab                                                                                                                           | 221649  |
| #6     | #1 OR #2 OR #3 OR #4 OR #5                                                                                                                                                                                                      | 432689  |
| #7     | 'primary prevention'/exp                                                                                                                                                                                                        | 33540   |
| #8     | 'preventive medicine'/exp                                                                                                                                                                                                       | 25875   |
| #9     | prevent*:ti,ab                                                                                                                                                                                                                  | 1469112 |
| #10    | protect*:ti OR reduc*:ti OR delay*:ti OR improv*:ti                                                                                                                                                                             | 850362  |
| #11    | #7 OR #8 OR #9 OR #10                                                                                                                                                                                                           | 2260166 |
| #12    | #6 AND #11                                                                                                                                                                                                                      | 49357   |
| #13    | 'dementia'/dm_pc                                                                                                                                                                                                                | 1833    |
| #14    | 'mild cognitive impairment'/exp/dm_pc                                                                                                                                                                                           | 90      |
| #15    | 'alzheimer disease'/exp/dm_pc                                                                                                                                                                                                   | 4342    |
| #16    | #12 OR #13 OR #14 OR #15                                                                                                                                                                                                        | 52112   |
| #17    | 'continuing education'/exp OR 'continuing education provider'/exp                                                                                                                                                               | 29360   |
| #18    | ((continuing OR adult) NEAR/2 (education OR training)):ti,ab                                                                                                                                                                    | 24617   |
| #19    | lifelong learning':ti,ab OR 'life-long learning':ti,ab                                                                                                                                                                          | 1695    |
| #20    | 'education'/de OR 'adult education'/exp OR 'lifelong learning'/exp OR 'mentoring'/exp OR 'masters education'/exp OR 'postdoctoral education'/exp OR 'postgraduate education'/exp OR 'community college'/exp OR 'university'/exp | 466817  |
| #21    | learn*:ti OR class:ti OR classes:ti OR course*:ti OR educat*:ti OR school*:ti OR train*:ti OR seminar*:ti OR tutor*:ti                                                                                                          | 633869  |
| #22    | (cognitiv* NEAR/2 (stimulat* OR activit*)):ti                                                                                                                                                                                   | 930     |
| #23    | #17 OR #18 OR #19 OR #20 OR #21 OR #22                                                                                                                                                                                          | 1006895 |
| #24    | #16 AND #23                                                                                                                                                                                                                     | 3837    |
| #25    | 'animal'/exp NOT 'human'/exp                                                                                                                                                                                                    | 4833576 |
| #26    | #24 NOT #25                                                                                                                                                                                                                     | 2924    |
| #27    | 'groups by age'/exp NOT ('middle aged'/exp OR 'aged'/exp)                                                                                                                                                                       | 5653684 |
| #28    | #26 NOT #27                                                                                                                                                                                                                     | 2223    |
| #29    | #28 AND [1990-2017]/py                                                                                                                                                                                                          | 2199    |
| #30    | 'medication therapy management'/exp OR 'dementia'/exp/dm_dt OR 'pharmaceutical vehicles and additives'/exp                                                                                                                      | 1386295 |
| #31    | #29 NOT #30                                                                                                                                                                                                                     | 2022    |
| #32    | #31 NOT 'conference abstract'/it                                                                                                                                                                                                | 996     |

**Embase (updated 9 April 2018)**

| No. | Query                                                                                                                                                                                                                           | Hits    |
|-----|---------------------------------------------------------------------------------------------------------------------------------------------------------------------------------------------------------------------------------|---------|
| #1  | 'dementia'/exp                                                                                                                                                                                                                  | 308108  |
| #2  | 'alzheimer disease'/exp                                                                                                                                                                                                         | 167836  |
| #3  | 'mild cognitive impairment'/exp                                                                                                                                                                                                 | 19554   |
| #4  | dementia:ti,ab OR alzheimer*:ti,ab                                                                                                                                                                                              | 245698  |
| #5  | ((cognit* OR memory OR mental) NEAR/3 (impair* OR decline* OR deficit* OR reduc* OR function*)):ti,ab                                                                                                                           | 244483  |
| #6  | #1 OR #2 OR #3 OR #4 OR #5                                                                                                                                                                                                      | 519886  |
| #7  | 'primary prevention'/exp                                                                                                                                                                                                        | 35604   |
| #8  | 'preventive medicine'/exp                                                                                                                                                                                                       | 26670   |
| #9  | prevent*:ti,ab                                                                                                                                                                                                                  | 1576370 |
| #10 | protect*:ti OR reduc*:ti OR delay*:ti OR improv*:ti OR increas*:ti OR decreas*:ti                                                                                                                                               | 1272239 |
| #11 | #7 OR #8 OR #9 OR #10                                                                                                                                                                                                           | 2758722 |
| #12 | #6 AND #11                                                                                                                                                                                                                      | 66376   |
| #13 | 'dementia'/dm_pc                                                                                                                                                                                                                | 1929    |
| #14 | 'mild cognitive impairment'/exp/dm_pc                                                                                                                                                                                           | 101     |
| #15 | 'alzheimer disease'/exp/dm_pc                                                                                                                                                                                                   | 4515    |
| #16 | 'cognitive reserve'/exp                                                                                                                                                                                                         | 1346    |
| #17 | 'cognitive reserve':ti,ab                                                                                                                                                                                                       | 1463    |
| #18 | #12 OR #13 OR #14 OR #15 OR #16 OR #17                                                                                                                                                                                          | 70716   |
| #19 | 'continuing education'/exp OR 'continuing education provider'/exp                                                                                                                                                               | 30115   |
| #20 | ((continuing OR adult) NEAR/2 (education OR training)):ti,ab                                                                                                                                                                    | 25787   |
| #21 | 'lifelong learning':ti,ab OR 'life-long learning':ti,ab                                                                                                                                                                         | 1820    |
| #22 | 'education'/de OR 'adult education'/exp OR 'lifelong learning'/exp OR 'mentoring'/exp OR 'masters education'/exp OR 'postdoctoral education'/exp OR 'postgraduate education'/exp OR 'community college'/exp OR 'university'/exp | 492706  |
| #23 | learn*:ti OR class:ti OR classes:ti OR course*:ti OR educat*:ti OR school*:ti OR train*:ti OR seminar*:ti OR tutor*:ti                                                                                                          | 669572  |
| #24 | (cognitiv* NEAR/2 (stimulat* OR activit*)):ti                                                                                                                                                                                   | 1040    |
| #25 | ('late life' NEAR/2 (activity OR activities OR learn* OR school* OR educat* OR training)):ti,ab                                                                                                                                 | 131     |
| #26 | #19 OR #20 OR #21 OR #22 OR #23 OR #24 OR #25                                                                                                                                                                                   | 1064036 |
| #27 | #18 AND #26                                                                                                                                                                                                                     | 5231    |
| #28 | 'animal'/exp NOT 'human'/exp                                                                                                                                                                                                    | 5020589 |
| #29 | #27 NOT #28                                                                                                                                                                                                                     | 4140    |
| #30 | 'groups by age'/exp NOT ('middle aged'/exp OR 'aged'/exp)                                                                                                                                                                       | 6115551 |
| #31 | #29 NOT #30                                                                                                                                                                                                                     | 3114    |
| #32 | 'medication therapy management'/exp OR 'dementia'/exp/dm_dt OR 'pharmaceutical vehicles and additives'/exp                                                                                                                      | 1465869 |
| #33 | #31 NOT #32                                                                                                                                                                                                                     | 2862    |
| #34 | #33 NOT 'conference abstract'/it                                                                                                                                                                                                | 1380    |
| #35 | #34 AND [1-7-2017]/sd NOT [9-4-2018]/sd                                                                                                                                                                                         | 131     |
| #36 | #34 AND [2017-2018]/py                                                                                                                                                                                                          | 174     |
| #37 | #35 OR #36                                                                                                                                                                                                                      | 189     |

## CINHAL (10 July 2017)

| Search | Query                                                                                                                                                                                                                | Limiters/Expanders                      | Hits   |
|--------|----------------------------------------------------------------------------------------------------------------------------------------------------------------------------------------------------------------------|-----------------------------------------|--------|
| S1     | (MH "Dementia") OR (MH "Alzheimer's Disease")                                                                                                                                                                        | Search modes - Find all my search terms | 37751  |
| S2     | dementia OR alzheimer*                                                                                                                                                                                               | Search modes - Find all my search terms | 46604  |
| S3     | ((cognit* OR memory OR mental) N3 (impair* OR decline* OR deficit* OR reduc* OR function*))                                                                                                                          | Search modes - Find all my search terms | 29346  |
| S4     | S1 OR S2 OR S3                                                                                                                                                                                                       | Search modes - Find all my search terms | 67725  |
| S5     | (MH "Preventive Health Care")                                                                                                                                                                                        | Search modes - Find all my search terms | 1075   |
| S6     | TI prevent* OR AB prevent*                                                                                                                                                                                           | Search modes - Find all my search terms | 170718 |
| S7     | TI (protect* OR reduc* OR delay* OR improv*)                                                                                                                                                                         | Search modes - Find all my search terms | 124328 |
| S8     | S5 OR S6 OR S7                                                                                                                                                                                                       | Search modes - Find all my search terms | 290518 |
| S9     | S4 AND S8                                                                                                                                                                                                            | Search modes - Find all my search terms | 6261   |
| S10    | (MH "Dementia/PC") OR (MH "Alzheimer's Disease/PC")                                                                                                                                                                  | Search modes - Find all my search terms | 2009   |
| S11    | S9 OR S10                                                                                                                                                                                                            | Search modes - Find all my search terms | 7692   |
| S12    | (MH "Education, Continuing") OR (MH "Continuing Education Providers") OR (MH "Education, Diploma Programs") OR (MH "Education, Continuing (Credit)") OR (MH "Education, Masters") OR (MH "Education, Post-Doctoral") | Search modes - Find all my search terms | 87064  |
| S13    | (MH "Learning") OR (MH "Lifelong Learning")                                                                                                                                                                          | Search modes - Find all my search terms | 10771  |
| S14    | (MH "Education, Nonprofessional") OR (MH "Adult Education") OR (MH "Education, Non-Traditional+")                                                                                                                    | Search modes - Find all my search terms | 7406   |
| S15    | TI (learn* OR class OR classes OR course* OR educat* OR school* OR train* OR seminar* OR tutor*) OR TI (cognitiv* N2 (stimulat* OR activit*))                                                                        | Search modes - Find all my search terms | 180228 |



|    |     |                                   |                            |
|----|-----|-----------------------------------|----------------------------|
| 1  |     |                                   |                            |
| 2  |     |                                   |                            |
| 3  |     |                                   |                            |
| 4  |     | "lifelong learning" OR "life-long |                            |
| 5  |     | learning" OR ((continuing OR      |                            |
| 6  |     | adult) N2 (education OR           |                            |
| 7  |     | training))                        | Search modes - Find all my |
| 8  | S16 |                                   | search terms 106290        |
| 9  |     | S12 OR S13 OR S14 OR S15 OR       | Search modes - Find all my |
| 10 | S17 | S16                               | search terms 27,763        |
| 11 |     |                                   | Search modes - Find all my |
| 12 | S18 | S11 AND S17                       | search terms 667           |
| 13 |     |                                   | Search modes - Find all my |
| 14 | S19 | MH "Animal Studies"               | search terms 39763         |
| 15 |     |                                   | Search modes - Find all my |
| 16 | S20 | S18 NOT S19                       | search terms 618           |
| 17 |     |                                   | Search modes - Find all my |
| 18 |     | MH "Named Groups by Age+"         |                            |
| 19 |     | NOT (MH "Middle Age" OR MH        | Search modes - Find all my |
| 20 | S21 | "Aged+")                          | search terms 55371         |
| 21 |     |                                   | Search modes - Find all my |
| 22 | S22 | S20 NOT S21                       | search terms 552           |
| 23 |     |                                   | Limiters - Published Date: |
| 24 | S23 | S22                               | 19900101-20171231 557      |
| 25 |     |                                   |                            |
| 26 |     |                                   |                            |
| 27 |     |                                   |                            |
| 28 |     |                                   |                            |
| 29 |     |                                   |                            |
| 30 |     |                                   |                            |
| 31 |     |                                   |                            |
| 32 |     |                                   |                            |
| 33 |     |                                   |                            |
| 34 |     |                                   |                            |
| 35 |     |                                   |                            |
| 36 |     |                                   |                            |
| 37 |     |                                   |                            |
| 38 |     |                                   |                            |
| 39 |     |                                   |                            |
| 40 |     |                                   |                            |
| 41 |     |                                   |                            |
| 42 |     |                                   |                            |
| 43 |     |                                   |                            |
| 44 |     |                                   |                            |
| 45 |     |                                   |                            |
| 46 |     |                                   |                            |
| 47 |     |                                   |                            |
| 48 |     |                                   |                            |
| 49 |     |                                   |                            |
| 50 |     |                                   |                            |
| 51 |     |                                   |                            |
| 52 |     |                                   |                            |
| 53 |     |                                   |                            |
| 54 |     |                                   |                            |
| 55 |     |                                   |                            |
| 56 |     |                                   |                            |
| 57 |     |                                   |                            |
| 58 |     |                                   |                            |
| 59 |     |                                   |                            |
| 60 |     |                                   |                            |

### CINHAL (8 April 2018)

| Search | Query                                                                                                                                                                                                                | Limiters/Expanders                      | Results |
|--------|----------------------------------------------------------------------------------------------------------------------------------------------------------------------------------------------------------------------|-----------------------------------------|---------|
| S1     | (MH "Dementia") OR (MH "Alzheimer's Disease")                                                                                                                                                                        | Search modes - Find all my search terms | 40,224  |
| S2     | dementia OR alzheimer*                                                                                                                                                                                               | Search modes - Find all my search terms | 50,090  |
| S3     | ((cognit* OR memory OR mental) N3 (impair* OR decline* OR deficit* OR reduc* OR function*))                                                                                                                          | Search modes - Find all my search terms | 32,856  |
| S4     | S1 OR S2 OR S3                                                                                                                                                                                                       | Search modes - Find all my search terms | 73,809  |
| S5     | (MH "Preventive Health Care")                                                                                                                                                                                        | Search modes - Find all my search terms | 11,313  |
| S6     | TI prevent* OR AB prevent*                                                                                                                                                                                           | Search modes - Find all my search terms | 186,284 |
| S7     | TI (protect* OR reduc* OR delay* OR improv*)                                                                                                                                                                         | Search modes - Find all my search terms | 134,37  |
| S8     | S5 OR S6 OR S7                                                                                                                                                                                                       | Search modes - Find all my search terms | 315,336 |
| S9     | S4 AND S8                                                                                                                                                                                                            | Search modes - Find all my search terms | 7,002   |
| S10    | (MH "Dementia/PC") OR (MH "Alzheimer's Disease/PC")                                                                                                                                                                  | Search modes - Find all my search terms | 2,127   |
| S11    | S9 OR S10                                                                                                                                                                                                            | Search modes - Find all my search terms | 8,479   |
| S12    | (MH "Education, Continuing") OR (MH "Continuing Education Providers") OR (MH "Education, Diploma Programs") OR (MH "Education, Continuing (Credit)") OR (MH "Education, Masters") OR (MH "Education, Post-Doctoral") | Search modes - Find all my search terms | 89,104  |
| S13    | (MH "Learning") OR (MH "Lifelong Learning")                                                                                                                                                                          | Search modes - Find all my search terms | 11,971  |
| S14    | (MH "Education, Nonprofessional") OR (MH "Adult Education") OR (MH "Education, Non-Traditional+")                                                                                                                    | Search modes - Find all my search terms | 7,799   |
| S15    | TI (learn* OR class OR classes OR course* OR educat* OR school* OR train* OR seminar* OR tutor*) OR TI (cognitiv* N2 (stimulat* OR activit*))                                                                        | Search modes - Find all my search terms | 191,967 |
| S16    | "lifelong learning" OR "life-long learning" OR ((continuing OR adult) N2 (education OR training)) OR ("late life" N1 (activity OR activities OR learn* OR school* OR educat* OR training))                           | Search modes - Find all my search terms | 109,49  |

|    |     |                                                               |                                         |         |
|----|-----|---------------------------------------------------------------|-----------------------------------------|---------|
| 1  |     |                                                               |                                         |         |
| 2  |     |                                                               |                                         |         |
| 3  | S17 | S12 OR S13 OR S14 OR S15 OR S16                               | Search modes - Find all my search terms | 290,595 |
| 4  |     |                                                               |                                         |         |
| 5  | S18 | S11 AND S17                                                   | Search modes - Find all my search terms | 753     |
| 6  |     |                                                               |                                         |         |
| 7  | S19 | MH "Animal Studies"                                           | Search modes - Find all my search terms | 43,810  |
| 8  |     |                                                               |                                         |         |
| 9  | S20 | S18 NOT S19                                                   | Search modes - Find all my search terms | 691     |
| 10 |     |                                                               |                                         |         |
| 11 | S21 | MH "Named Groups by Age+" NOT (MH "Middle Age" OR MH "Aged+") | Search modes - Find all my search terms | 595,044 |
| 12 |     |                                                               |                                         |         |
| 13 | S22 | S20 NOT S21                                                   | Search modes - Find all my search terms | 617     |
| 14 |     |                                                               |                                         |         |
| 15 | S23 | S22                                                           | Limiters - Published Date: 20170101-    | 78      |
| 16 |     |                                                               |                                         |         |
| 17 | S24 | S22 AND EM 20170701-                                          | Search modes - Find all my search terms | 66      |
| 18 |     |                                                               |                                         |         |
| 19 | S25 | S23 OR S24                                                    | Search modes - Find all my search terms | 95      |
| 20 |     |                                                               |                                         |         |
| 21 |     |                                                               |                                         |         |
| 22 |     |                                                               |                                         |         |
| 23 |     |                                                               |                                         |         |
| 24 |     |                                                               |                                         |         |
| 25 |     |                                                               |                                         |         |
| 26 |     |                                                               |                                         |         |
| 27 |     |                                                               |                                         |         |
| 28 |     |                                                               |                                         |         |
| 29 |     |                                                               |                                         |         |
| 30 |     |                                                               |                                         |         |
| 31 |     |                                                               |                                         |         |
| 32 |     |                                                               |                                         |         |
| 33 |     |                                                               |                                         |         |
| 34 |     |                                                               |                                         |         |
| 35 |     |                                                               |                                         |         |
| 36 |     |                                                               |                                         |         |
| 37 |     |                                                               |                                         |         |
| 38 |     |                                                               |                                         |         |
| 39 |     |                                                               |                                         |         |
| 40 |     |                                                               |                                         |         |
| 41 |     |                                                               |                                         |         |
| 42 |     |                                                               |                                         |         |
| 43 |     |                                                               |                                         |         |
| 44 |     |                                                               |                                         |         |
| 45 |     |                                                               |                                         |         |
| 46 |     |                                                               |                                         |         |
| 47 |     |                                                               |                                         |         |
| 48 |     |                                                               |                                         |         |
| 49 |     |                                                               |                                         |         |
| 50 |     |                                                               |                                         |         |
| 51 |     |                                                               |                                         |         |
| 52 |     |                                                               |                                         |         |
| 53 |     |                                                               |                                         |         |
| 54 |     |                                                               |                                         |         |
| 55 |     |                                                               |                                         |         |
| 56 |     |                                                               |                                         |         |
| 57 |     |                                                               |                                         |         |
| 58 |     |                                                               |                                         |         |
| 59 |     |                                                               |                                         |         |
| 60 |     |                                                               |                                         |         |

## ERIC (10 July 2017)

| Search | Query                                                                                                                                                                                                                                                                                                          | Limiters/Expanders                      | Hits   |
|--------|----------------------------------------------------------------------------------------------------------------------------------------------------------------------------------------------------------------------------------------------------------------------------------------------------------------|-----------------------------------------|--------|
| S1     | DE "Dementia" OR DE "Alzheimers Disease"                                                                                                                                                                                                                                                                       | Search modes - Find all my search terms | 1036   |
| S2     | DE "Cognitive Ability"                                                                                                                                                                                                                                                                                         | Search modes - Find all my search terms | 8133   |
| S3     | dementia OR alzheimer*                                                                                                                                                                                                                                                                                         | Search modes - Find all my search terms | 1286   |
| S4     | ((cognit* OR memory OR mental) N3 (impair* OR decline* OR deficit* OR reduc* OR function*))                                                                                                                                                                                                                    | Search modes - Find all my search terms | 6424   |
| S5     | S1 OR S2 OR S3 OR S4                                                                                                                                                                                                                                                                                           | Search modes - Find all my search terms | 14489  |
| S6     | (DE "Early Intervention" OR DE "Prevention") OR (DE "Preventive Medicine")                                                                                                                                                                                                                                     | Search modes - Find all my search terms | 22132  |
| S7     | TI prevent* OR AB prevent*                                                                                                                                                                                                                                                                                     | Search modes - Find all my search terms | 33142  |
| S8     | TI (protect* OR reduc* OR delay* OR improv*)                                                                                                                                                                                                                                                                   | Search modes - Find all my search terms | 30866  |
| S9     | S6 OR S7 OR S8                                                                                                                                                                                                                                                                                                 | Search modes - Find all my search terms | 71745  |
| S10    | S5 AND S9                                                                                                                                                                                                                                                                                                      | Search modes - Find all my search terms | 828    |
| S11    | DE "Adult Education" OR DE "Adult Basic Education" OR DE "Continuing Education" OR DE "Migrant Adult Education" OR DE "Preretirement Education" OR DE "Public School Adult Education" OR DE "Veterans Education"                                                                                               | Search modes - Find all my search terms | 56528  |
| S12    | DE "Adult Learning" OR DE "Adult Programs" OR DE "Adult Reading Programs" OR DE "High School Equivalency Programs" OR DE "Evening Programs" OR DE "Part Time Students" OR DE "Distance Education" OR DE "Extension Education" OR DE "External Degree Programs" OR DE "Rural Extension" OR DE "Urban Extension" | Search modes - Find all my search terms | 35681  |
| S13    | (DE "Adult Students") OR (DE "Evening Students")                                                                                                                                                                                                                                                               | Search modes - Find all my search terms | 7787   |
| S14    | ((DE "Nonschool Educational Programs") OR (DE "Community Education")) OR (DE "Postsecondary Education" OR DE "Higher Education")                                                                                                                                                                               | Search modes - Find all my search terms | 431319 |

|    |     |                                                                   |                                                 |        |
|----|-----|-------------------------------------------------------------------|-------------------------------------------------|--------|
| 1  |     |                                                                   |                                                 |        |
| 2  |     |                                                                   |                                                 |        |
| 3  |     |                                                                   |                                                 |        |
| 4  | S15 | DE "Continuing Education Units" OR<br>DE "Lifelong Learning"      | Search modes - Find all my<br>search terms      | 8046   |
| 5  |     |                                                                   |                                                 |        |
| 6  |     | TI (learn* OR class OR classes OR                                 |                                                 |        |
| 7  | S16 | course* OR educat* OR school* OR<br>train* OR seminar* OR tutor*) | Search modes - Find all my<br>search terms      | 555016 |
| 8  |     |                                                                   |                                                 |        |
| 9  |     | TI (cognitiv* N2 (stimulat* OR                                    |                                                 |        |
| 10 | S17 | activit*))                                                        | Search modes - Find all my<br>search terms      | 94     |
| 11 |     |                                                                   |                                                 |        |
| 12 | S18 | ((continuing OR adult) N2 (education<br>OR training))             | Search modes - Find all my<br>search terms      | 76187  |
| 13 |     |                                                                   |                                                 |        |
| 14 | S19 | "lifelong learning" or "life-long<br>learning"                    | Search modes - Find all my<br>search terms      | 10135  |
| 15 |     |                                                                   |                                                 |        |
| 16 | S20 | S11 OR S12 OR S13 OR S14 OR S15 OR<br>S16 OR S17 OR S18 OR S19    | Search modes - Find all my<br>search terms      | 851728 |
| 17 |     |                                                                   |                                                 |        |
| 18 |     |                                                                   |                                                 |        |
| 19 | S21 | S10 AND S20                                                       | Search modes - Find all my<br>search terms      | 286    |
| 20 |     |                                                                   |                                                 |        |
| 21 |     |                                                                   |                                                 |        |
| 22 | S22 | S21                                                               | Limiters - Date Published:<br>19900101-20171231 | 234    |
| 23 |     |                                                                   |                                                 |        |
| 24 |     |                                                                   |                                                 |        |
| 25 |     |                                                                   |                                                 |        |
| 26 |     |                                                                   |                                                 |        |
| 27 |     |                                                                   |                                                 |        |
| 28 |     |                                                                   |                                                 |        |
| 29 |     |                                                                   |                                                 |        |
| 30 |     |                                                                   |                                                 |        |
| 31 |     |                                                                   |                                                 |        |
| 32 |     |                                                                   |                                                 |        |
| 33 |     |                                                                   |                                                 |        |
| 34 |     |                                                                   |                                                 |        |
| 35 |     |                                                                   |                                                 |        |
| 36 |     |                                                                   |                                                 |        |
| 37 |     |                                                                   |                                                 |        |
| 38 |     |                                                                   |                                                 |        |
| 39 |     |                                                                   |                                                 |        |
| 40 |     |                                                                   |                                                 |        |
| 41 |     |                                                                   |                                                 |        |
| 42 |     |                                                                   |                                                 |        |
| 43 |     |                                                                   |                                                 |        |
| 44 |     |                                                                   |                                                 |        |
| 45 |     |                                                                   |                                                 |        |
| 46 |     |                                                                   |                                                 |        |
| 47 |     |                                                                   |                                                 |        |
| 48 |     |                                                                   |                                                 |        |
| 49 |     |                                                                   |                                                 |        |
| 50 |     |                                                                   |                                                 |        |
| 51 |     |                                                                   |                                                 |        |
| 52 |     |                                                                   |                                                 |        |
| 53 |     |                                                                   |                                                 |        |
| 54 |     |                                                                   |                                                 |        |
| 55 |     |                                                                   |                                                 |        |
| 56 |     |                                                                   |                                                 |        |
| 57 |     |                                                                   |                                                 |        |
| 58 |     |                                                                   |                                                 |        |
| 59 |     |                                                                   |                                                 |        |
| 60 |     |                                                                   |                                                 |        |

**ERIC (8 April 2018)**

| Search | Query                                                                                                                                                                                                                                                                                                          | Limiters/Expanders                      | Results |
|--------|----------------------------------------------------------------------------------------------------------------------------------------------------------------------------------------------------------------------------------------------------------------------------------------------------------------|-----------------------------------------|---------|
| S1     | DE "Dementia" OR DE "Alzheimers Disease"                                                                                                                                                                                                                                                                       | Search modes - Find all my search terms | 1,075   |
| S2     | DE "Cognitive Ability"                                                                                                                                                                                                                                                                                         | Search modes - Find all my search terms | 8,553   |
| S3     | dementia OR alzheimer*                                                                                                                                                                                                                                                                                         | Search modes - Find all my search terms | 1,332   |
| S4     | ((cognit* OR memory OR mental) N3 (impair* OR decline* OR deficit* OR reduc* OR function*))                                                                                                                                                                                                                    | Search modes - Find all my search terms | 6,684   |
| S5     | S1 OR S2 OR S3 OR S4                                                                                                                                                                                                                                                                                           | Search modes - Find all my search terms | 15,155  |
| S6     | (DE "Early Intervention" OR DE "Prevention") OR (DE "Preventive Medicine")                                                                                                                                                                                                                                     | Search modes - Find all my search terms | 22,911  |
| S7     | TI prevent* OR AB prevent*                                                                                                                                                                                                                                                                                     | Search modes - Find all my search terms | 34,284  |
| S8     | TI (protect* OR reduc* OR delay* OR improv*)                                                                                                                                                                                                                                                                   | Search modes - Find all my search terms | 32,348  |
| S9     | S6 OR S7 OR S8                                                                                                                                                                                                                                                                                                 | Search modes - Find all my search terms | 74,665  |
| S10    | S5 AND S9                                                                                                                                                                                                                                                                                                      | Search modes - Find all my search terms | 873     |
| S11    | DE "Adult Education" OR DE "Adult Basic Education" OR DE "Continuing Education" OR DE "Migrant Adult Education" OR DE "Preretirement Education" OR DE "Public School Adult Education" OR DE "Veterans Education"                                                                                               | Search modes - Find all my search terms | 57,669  |
| S12    | DE "Adult Learning" OR DE "Adult Programs" OR DE "Adult Reading Programs" OR DE "High School Equivalency Programs" OR DE "Evening Programs" OR DE "Part Time Students" OR DE "Distance Education" OR DE "Extension Education" OR DE "External Degree Programs" OR DE "Rural Extension" OR DE "Urban Extension" | Search modes - Find all my search terms | 36,853  |
| S13    | (DE "Adult Students") OR (DE "Evening Students")                                                                                                                                                                                                                                                               | Search modes - Find all my search terms | 8,01    |
| S14    | ((DE "Nonschool Educational Programs") OR (DE "Community Education")) OR (DE "Postsecondary Education" OR DE "Higher Education")                                                                                                                                                                               | Search modes - Find all my search terms | 452,212 |
| S15    | DE "Continuing Education Units" OR DE "Lifelong Learning"                                                                                                                                                                                                                                                      | Search modes - Find all my search terms | 8,311   |
| S16    | TI (learn* OR class OR classes OR course* OR educat* OR school* OR train* OR seminar* OR tutor*)                                                                                                                                                                                                               | Search modes - Find all my search terms | 579,695 |

|    |     |                                                                                     |                                         |         |
|----|-----|-------------------------------------------------------------------------------------|-----------------------------------------|---------|
| 1  |     |                                                                                     |                                         |         |
| 2  |     |                                                                                     |                                         |         |
| 3  | S17 | T1 (cognitiv* N2 (stimulat* OR activit*))                                           | Search modes - Find all my search terms | 102     |
| 4  |     |                                                                                     |                                         |         |
| 5  | S18 | ((continuing OR adult) N2 (education OR training))                                  | Search modes - Find all my search terms | 77,861  |
| 6  |     |                                                                                     |                                         |         |
| 7  | S19 | "late life" N2 (activity OR activities OR learn* OR school* OR educat* OR training) | Search modes - Find all my search terms | 17      |
| 8  |     |                                                                                     |                                         |         |
| 9  | S20 | "lifelong learning" OR "life-long learning"                                         | Search modes - Find all my search terms | 10,521  |
| 10 |     |                                                                                     |                                         |         |
| 11 | S21 | S11 OR S12 OR S13 OR S14 OR S15 OR S16 OR S17 OR S18 OR S19 OR S20                  | Search modes - Find all my search terms | 887,984 |
| 12 |     |                                                                                     |                                         |         |
| 13 | S22 | S10 AND S21                                                                         | Search modes - Find all my search terms | 309     |
| 14 |     |                                                                                     |                                         |         |
| 15 | S23 | S22                                                                                 | Limiters - Date Published: 20170101-    | 16      |
| 16 |     |                                                                                     |                                         |         |
| 17 | S24 | S22 AND EM 20170701-                                                                | Search modes - Find all my search terms | 0       |
| 18 |     |                                                                                     |                                         |         |
| 19 | S25 | S23 OR S24                                                                          | Search modes - Find all my search terms | 16      |
| 20 |     |                                                                                     |                                         |         |
| 21 |     |                                                                                     |                                         |         |
| 22 |     |                                                                                     |                                         |         |
| 23 |     |                                                                                     |                                         |         |
| 24 |     |                                                                                     |                                         |         |
| 25 |     |                                                                                     |                                         |         |
| 26 |     |                                                                                     |                                         |         |
| 27 |     |                                                                                     |                                         |         |
| 28 |     |                                                                                     |                                         |         |
| 29 |     |                                                                                     |                                         |         |
| 30 |     |                                                                                     |                                         |         |
| 31 |     |                                                                                     |                                         |         |
| 32 |     |                                                                                     |                                         |         |
| 33 |     |                                                                                     |                                         |         |
| 34 |     |                                                                                     |                                         |         |
| 35 |     |                                                                                     |                                         |         |
| 36 |     |                                                                                     |                                         |         |
| 37 |     |                                                                                     |                                         |         |
| 38 |     |                                                                                     |                                         |         |
| 39 |     |                                                                                     |                                         |         |
| 40 |     |                                                                                     |                                         |         |
| 41 |     |                                                                                     |                                         |         |
| 42 |     |                                                                                     |                                         |         |
| 43 |     |                                                                                     |                                         |         |
| 44 |     |                                                                                     |                                         |         |
| 45 |     |                                                                                     |                                         |         |
| 46 |     |                                                                                     |                                         |         |
| 47 |     |                                                                                     |                                         |         |
| 48 |     |                                                                                     |                                         |         |
| 49 |     |                                                                                     |                                         |         |
| 50 |     |                                                                                     |                                         |         |
| 51 |     |                                                                                     |                                         |         |
| 52 |     |                                                                                     |                                         |         |
| 53 |     |                                                                                     |                                         |         |
| 54 |     |                                                                                     |                                         |         |
| 55 |     |                                                                                     |                                         |         |
| 56 |     |                                                                                     |                                         |         |
| 57 |     |                                                                                     |                                         |         |
| 58 |     |                                                                                     |                                         |         |
| 59 |     |                                                                                     |                                         |         |
| 60 |     |                                                                                     |                                         |         |

1  
2  
3  
4  
5  
6  
7  
8  
9  
10  
11  
12  
13  
14  
15  
16  
17  
18  
19  
20  
21  
22  
23  
24  
25  
26  
27  
28  
29  
30  
31  
32  
33  
34  
35  
36  
37  
38  
39  
40  
41  
42  
43  
44  
45  
46  
47  
48  
49  
50  
51  
52  
53  
54  
55  
56  
57  
58  
59  
60

### PsycINFO (11 July 2017)

| Search | Query                                                                                                                                                                                          | Limiters/Expanders                           | Results   |
|--------|------------------------------------------------------------------------------------------------------------------------------------------------------------------------------------------------|----------------------------------------------|-----------|
| S1     | DE "Alzheimer's Disease"                                                                                                                                                                       | Search modes - Find all my search terms      | 39,900    |
| S2     | DE "Senile Dementia"                                                                                                                                                                           | Search modes - Find all my search terms      | 1,063     |
| S3     | DE "Cognitive Impairment"                                                                                                                                                                      | Search modes - Find all my search terms      | 30,409    |
| S4     | S1 OR S2 OR S3                                                                                                                                                                                 | Search modes - Find all my search terms      | 65,198    |
| S5     | DE "Prevention" OR DE "Preventive Medicine" OR DE "Primary Mental Health Prevention"                                                                                                           | Search modes - Find all my search terms      | 30,316    |
| S6     | TI prevent* OR AB prevent*                                                                                                                                                                     | Search modes - Find all my search terms      | 186,041   |
| S7     | TI protect* OR reduc* OR delay* OR improv*                                                                                                                                                     | Search modes - Find all my search terms      | 743,335   |
| S8     | S5 OR S6 OR S7                                                                                                                                                                                 | Search modes - Find all my search terms      | 869,214   |
| S9     | S4 AND S8                                                                                                                                                                                      | Search modes - Find all my search terms      | 21,587    |
| S10    | DE "Adult Education" OR DE "Continuing Education"                                                                                                                                              | Search modes - Find all my search terms      | 4,126     |
| S11    | TI (learning OR education OR educational OR training)                                                                                                                                          | Search modes - Find all my search terms      | 259,848   |
| S12    | TI cognitiv* N1 (stimulat* OR activit*)                                                                                                                                                        | Search modes - Find all my search terms      | 751       |
| S13    | "lifelong learning" OR "life-long learning"                                                                                                                                                    | Search modes - Find all my search terms      | 2,995     |
| S14    | (continuing OR adult) N2 (education OR training)                                                                                                                                               | Search modes - Find all my search terms      | 15,241    |
| S15    | S9 AND S11                                                                                                                                                                                     | Search modes - Find all my search terms      | 826       |
| S16    | (ZG "adolescence (13-17 yrs)" or ZG "adulthood (18 yrs & older)" or ZG "childhood (birth-12 yrs)") not (ZG "aged (65 yrs & older)" or ZG "middle age (40-64 yrs)")                             | Search modes - Find all my search terms      | 1,626,731 |
| S17    | S15 NOT S16                                                                                                                                                                                    | Search modes - Find all my search terms      | 683       |
| S18    | (DE "Health Education") OR (DE "Drug Therapy") OR (DE "Animals") OR DE "Animal Models" OR TI (rat OR rats OR mouse OR mice OR dog OR dogs) OR SU (rat OR rats OR mouse OR mice OR dog OR dogs) | Search modes - Find all my search terms      | 454,796   |
| S19    | S17 NOT S18                                                                                                                                                                                    | Search modes - Find all my search terms      | 414       |
| S20    | S17 NOT S18                                                                                                                                                                                    | Limiters - Published Date: 19900101-20171231 | 403       |



**PsycINFO (9 April 2018)**

| #   | Query                                                                                       | Limiters/Expanders                      | Results |
|-----|---------------------------------------------------------------------------------------------|-----------------------------------------|---------|
| S1  | DE "Alzheimer's Disease"                                                                    | Search modes - Find all my search terms | 41,992  |
| S2  | DE "Senile Dementia"                                                                        | Search modes - Find all my search terms | 1,063   |
| S3  | DE "Cognitive Impairment"                                                                   | Search modes - Find all my search terms | 32,064  |
| S4  | dementia OR alzheimer*                                                                      | Search modes - Find all my search terms | 99,018  |
| S5  | ((cognit* OR memory OR mental) N3 (impair* OR decline* OR deficit* OR reduc* OR function*)) | Search modes - Find all my search terms | 146,484 |
| S6  | S1 OR S2 OR S3 OR S4 OR S5                                                                  | Search modes - Find all my search terms | 210,638 |
| S7  | DE "Prevention" OR DE "Preventive Medicine" OR DE "Primary Mental Health Prevention"        | Search modes - Find all my search terms | 31,621  |
| S8  | TI prevent* OR AB prevent*                                                                  | Search modes - Find all my search terms | 195,469 |
| S9  | TI protect* OR reduc* OR delay* OR improv*                                                  | Search modes - Find all my search terms | 783,317 |
| S10 | S7 OR S8 OR S9                                                                              | Search modes - Find all my search terms | 914,878 |
| S11 | S6 AND S10                                                                                  | Search modes - Find all my search terms | 71,575  |
| S12 | DE "Cognitive Reserve"                                                                      | Search modes - Find all my search terms | 353     |
| S13 | "Cognitive Reserve"                                                                         | Search modes - Find all my search terms | 985     |
| S14 | S11 OR S12 OR S13                                                                           | Search modes - Find all my search terms | 72,193  |
| S15 | DE "Adult Education" OR DE "Continuing Education"                                           | Search modes - Find all my search terms | 4,2     |
| S16 | TI (learning OR education OR educational OR training)                                       | Search modes - Find all my search terms | 269,992 |
| S17 | TI cognitiv* N1 (stimulat* OR activit*)                                                     | Search modes - Find all my search terms | 794     |
| S18 | "lifelong learning" OR "life-long learning"                                                 | Search modes - Find all my search terms | 3,169   |
| S19 | (continuing OR adult) N2 (education OR training)                                            | Search modes - Find all my search terms | 15,885  |
| S20 | "late life" N2 (activity OR activities OR learn* OR school* OR educat* OR training)         | Search modes - Find all my search terms | 159     |
| S21 | S15 OR S16 OR S17 OR S18 OR S19 OR S20                                                      | Search modes - Find all my search terms | 281,675 |

|     |                                                                                                                                                                                                |                                         |           |
|-----|------------------------------------------------------------------------------------------------------------------------------------------------------------------------------------------------|-----------------------------------------|-----------|
| S22 | S14 AND S21                                                                                                                                                                                    | Search modes - Find all my search terms | 4,549     |
| S23 | (ZG "adolescence (13-17 yrs)" or ZG "adulthood (18 yrs & older)" or ZG "childhood (birth-12 yrs)") not (ZG "aged (65 yrs & older)" or ZG "middle age (40-64 yrs)")                             | Search modes - Find all my search terms | 1,695,649 |
| S24 | S22 NOT S23                                                                                                                                                                                    | Search modes - Find all my search terms | 3,295     |
| S25 | (DE "Health Education") OR (DE "Drug Therapy") OR (DE "Animals") OR DE "Animal Models" OR TI (rat OR rats OR mouse OR mice OR dog OR dogs) OR SU (rat OR rats OR mouse OR mice OR dog OR dogs) | Search modes - Find all my search terms | 465,312   |
| S26 | S24 NOT S25                                                                                                                                                                                    | Search modes - Find all my search terms | 2,094     |
| S27 | S26                                                                                                                                                                                            | Limiters - Publication Year: 2017-      | 276       |
| S28 | S26 AND RD 201707-                                                                                                                                                                             | Search modes - Find all my search terms | 197       |
| S29 | S27 OR S28                                                                                                                                                                                     | Search modes - Find all my search terms | 299       |

**ClinicalTrials.gov (16 May 2017)**

**280 studies found for:** (prevention OR reduction OR risk OR improvement) AND (dementia OR alzheimer OR "cognitive impairment" OR "cognitive decline") | healthy OR aged OR adult OR cognitive | education OR learning OR lesson OR educational OR class OR mental OR cognitive | Adult, Senior | Studies that accept healthy volunteers

**ClinicalTrials.gov (9 April 2018)**

**58 Studies found for:** (prevention OR reduction OR risk OR improvement) AND (dementia OR alzheimer OR "cognitive impairment" OR "cognitive decline") | healthy OR aged OR adult OR cognitive | education OR learning OR lesson OR educational OR class OR mental OR cognitive | Adult, Senior | Studies that accept healthy volunteers | First posted from 05/01/2017 to 04/09/2018

**ICTRP (16 May 2017)**

| ICTRP    |                                     |                                                                                                                                                              |
|----------|-------------------------------------|--------------------------------------------------------------------------------------------------------------------------------------------------------------|
| Search 1 | 21 records for 20 trials found for: | dementia AND education* AND prevent* OR alzheimer AND education* AND prevent* OR cognitive impairment AND education* AND prevent*                            |
| Search 2 | 3 records for 3 trials found for:   | dementia AND mental activ* AND prevent* OR alzheimer AND mental activ* AND prevent* OR cognitive impairment AND mental activ* AND prevent*                   |
| Search 3 | 3 records for 3 trials found for:   | dementia AND cognitive stimulat* AND prevent* OR alzheimer AND cognitive stimulat* AND prevent* OR cognitive impairment AND cognitive stimulat* AND prevent* |
| Search 4 | 11 records for 11 trials found for: | dementia AND learning AND prevent* OR alzheimer AND learning AND prevent* OR cognitive impairment AND learning AND prevent*                                  |
| Search 5 | No results were found for:          | dementia AND lesson* AND prevent* OR alzheimer AND lesson* AND prevent* OR cognitive impairment AND lesson* AND prevent*                                     |
| Search 6 | 45 records for 45 trials found for: | dementia AND training AND prevent* OR alzheimer AND training AND prevent* OR cognitive impairment AND training AND prevent*                                  |
| SUM      | <b>82</b>                           |                                                                                                                                                              |

**ICTRP (9 April 2018)**

|          |     |                                                                                                                                                              |
|----------|-----|--------------------------------------------------------------------------------------------------------------------------------------------------------------|
| Search 1 | 20  | dementia AND education* AND prevent* OR alzheimer AND education* AND prevent* OR cognitive impairment AND education* AND prevent*                            |
| Search 2 | 3   | dementia AND mental activ* AND prevent* OR alzheimer AND mental activ* AND prevent* OR cognitive impairment AND mental activ* AND prevent*                   |
| Search 3 | 5   | dementia AND cognitive stimulat* AND prevent* OR alzheimer AND cognitive stimulat* AND prevent* OR cognitive impairment AND cognitive stimulat* AND prevent* |
| Search 4 | 27  | dementia AND learning AND prevent* OR alzheimer AND learning AND prevent* OR cognitive impairment AND learning AND prevent*                                  |
| Search 5 | 1   | dementia AND lesson* AND prevent* OR alzheimer AND lesson* AND prevent* OR cognitive impairment AND lesson* AND prevent*                                     |
| Search 6 | 64  | dementia AND training AND prevent* OR alzheimer AND training AND prevent* OR cognitive impairment AND training AND prevent*                                  |
| SUM      | 120 |                                                                                                                                                              |

**ALOIS (15 May 2017)**

## ALOIS

---

|            |                                                        |
|------------|--------------------------------------------------------|
| Study Aim: | Cognitive Enhancement (healthy);<br>Primary Prevention |
|------------|--------------------------------------------------------|

---

|                    |                     |
|--------------------|---------------------|
| Intervention type: | Non-pharmacological |
|--------------------|---------------------|

---

|               |                   |                                   |
|---------------|-------------------|-----------------------------------|
| Intervention: | Contains any word | learning education<br>educational |
|---------------|-------------------|-----------------------------------|

---

---

**18** Studies found

**ALOIS (9 April 2018)**

Not searched website down

**DART-Europe (16 May 2017)**

| search                                                                                                                                                                | results |
|-----------------------------------------------------------------------------------------------------------------------------------------------------------------------|---------|
| (dementia OR alzheimer* OR "cognitive impairment") AND (education* OR "mental activity" OR "mental activities" OR "cognitive stimulation") AND (prevent* OR improve*) | 43      |

**DART-Europe (8 April 2018)**

| search                                                                                                                                                                | results |
|-----------------------------------------------------------------------------------------------------------------------------------------------------------------------|---------|
| (dementia OR alzheimer* OR "cognitive impairment") AND (education* OR "mental activity" OR "mental activities" OR "cognitive stimulation") AND (prevent* OR improve*) | 56      |
| YEAR: 2017                                                                                                                                                            | 4       |

## Supplementary file 4: Search Strategies of Overview of Systematic Reviews, by database

### Medline (via PubMed): 10 July 2017

| #  | Suchen                                                                                                                                                                                                                                                                                                                                                                                                                                                 | Ergebnisse |
|----|--------------------------------------------------------------------------------------------------------------------------------------------------------------------------------------------------------------------------------------------------------------------------------------------------------------------------------------------------------------------------------------------------------------------------------------------------------|------------|
| 1  | Dementia/ or exp Alzheimer Disease/                                                                                                                                                                                                                                                                                                                                                                                                                    | 117573     |
| 2  | Cognitive Dysfunction/                                                                                                                                                                                                                                                                                                                                                                                                                                 | 5969       |
| 3  | Cognition/                                                                                                                                                                                                                                                                                                                                                                                                                                             | 81563      |
| 4  | (dementia or alzheimer*).ti,ab.                                                                                                                                                                                                                                                                                                                                                                                                                        | 175194     |
| 5  | ((cognit* or memory or mental) adj3 (impair* or decline* or deficit* or reduc* or function*)).ti,ab.                                                                                                                                                                                                                                                                                                                                                   | 167110     |
| 6  | or/1-5                                                                                                                                                                                                                                                                                                                                                                                                                                                 | 371089     |
| 7  | exp Leisure Activities/                                                                                                                                                                                                                                                                                                                                                                                                                                | 209051     |
| 8  | leisure.ti,ab.                                                                                                                                                                                                                                                                                                                                                                                                                                         | 13073      |
| 9  | (hobby or hobbies).ti,ab.                                                                                                                                                                                                                                                                                                                                                                                                                              | 1465       |
| 10 | free time.ti,ab.                                                                                                                                                                                                                                                                                                                                                                                                                                       | 1405       |
| 11 | Recreation.ti,ab.                                                                                                                                                                                                                                                                                                                                                                                                                                      | 4826       |
| 12 | (in-door or out-door or indoor or outdoor).ti.                                                                                                                                                                                                                                                                                                                                                                                                         | 8929       |
| 13 | (garden* or horticultur*).ti.                                                                                                                                                                                                                                                                                                                                                                                                                          | 3216       |
| 14 | (play* or game? or gaming).ti.                                                                                                                                                                                                                                                                                                                                                                                                                         | 46562      |
| 15 | (creativ* or painting or drawing or reading).ti.                                                                                                                                                                                                                                                                                                                                                                                                       | 24387      |
| 16 | (voluntary or volunteer* or extracurricular).ti.                                                                                                                                                                                                                                                                                                                                                                                                       | 32266      |
| 17 | or/7-16                                                                                                                                                                                                                                                                                                                                                                                                                                                | 321695     |
| 18 | 6 and 17                                                                                                                                                                                                                                                                                                                                                                                                                                               | 9189       |
| 19 | exp age groups/ not (exp aged/ or middle aged/)                                                                                                                                                                                                                                                                                                                                                                                                        | 3712487    |
| 20 | 18 not 19                                                                                                                                                                                                                                                                                                                                                                                                                                              | 6496       |
| 21 | (systematic or structured or evidence or trials).ti. and ((review or overview or look or examination or update* or summary).ti. or review.pt.)                                                                                                                                                                                                                                                                                                         | 118333     |
| 22 | (0266-4623 or 1469-493X or 1366-5278 or 1530-440X).is.                                                                                                                                                                                                                                                                                                                                                                                                 | 15710      |
| 23 | meta-analysis.pt. or Network Meta-Analysis/ or (meta-analys* or meta analys* or metaanalys* or meta synth* or meta-synth* or metasynth*).tw,hw.                                                                                                                                                                                                                                                                                                        | 145368     |
| 24 | review.pt. and ((medline or medlars or embase or pubmed or scisearch or psychinfo or psycinfo or psychlit or psyclit or cinahl or electronic database* or bibliographic database* or computeri#ed database* or online database* or pooling or pooled or mantel haenszel or peto or dersimonian or der simonian or fixed effect or ((hand adj2 search*) or (manual* adj2 search*))).tw,hw. or (retraction of publication or retracted publication).pt.) | 117882     |
| 25 | ((systematic or meta) adj2 (analys* or review)).ti,kf. or ((systematic* or quantitativ* or methodologic*) adj5 (review* or overview*)).tw,hw. or (quantitativ\$ adj5 synthesis\$).tw,hw.                                                                                                                                                                                                                                                               | 171997     |

|    |    |                                                                        |        |
|----|----|------------------------------------------------------------------------|--------|
| 1  |    |                                                                        |        |
| 2  |    |                                                                        |        |
| 3  | 26 | (integrative research review* or research integration).tw. or scoping  | 167686 |
| 4  |    | review?.ti,kf. or (review.ti,kf,pt. and (trials as topic or studies as |        |
| 5  |    | topic).hw.) or (evidence adj3 review*).ti,ab,kf.                       |        |
| 6  |    |                                                                        |        |
| 7  | 27 | 21 or 22 or 23 or 24 or 25 or 26                                       | 412039 |
| 8  | 28 | 27 not (case report/ or letter.pt.)                                    | 401602 |
| 9  | 29 | 20 and 28                                                              | 243    |
| 10 | 30 | remove duplicates from 29                                              | 229    |
| 11 |    |                                                                        |        |
| 12 |    |                                                                        |        |
| 13 |    |                                                                        |        |
| 14 |    |                                                                        |        |
| 15 |    |                                                                        |        |
| 16 |    |                                                                        |        |
| 17 |    |                                                                        |        |
| 18 |    |                                                                        |        |
| 19 |    |                                                                        |        |
| 20 |    |                                                                        |        |
| 21 |    |                                                                        |        |
| 22 |    |                                                                        |        |
| 23 |    |                                                                        |        |
| 24 |    |                                                                        |        |
| 25 |    |                                                                        |        |
| 26 |    |                                                                        |        |
| 27 |    |                                                                        |        |
| 28 |    |                                                                        |        |
| 29 |    |                                                                        |        |
| 30 |    |                                                                        |        |
| 31 |    |                                                                        |        |
| 32 |    |                                                                        |        |
| 33 |    |                                                                        |        |
| 34 |    |                                                                        |        |
| 35 |    |                                                                        |        |
| 36 |    |                                                                        |        |
| 37 |    |                                                                        |        |
| 38 |    |                                                                        |        |
| 39 |    |                                                                        |        |
| 40 |    |                                                                        |        |
| 41 |    |                                                                        |        |
| 42 |    |                                                                        |        |
| 43 |    |                                                                        |        |
| 44 |    |                                                                        |        |
| 45 |    |                                                                        |        |
| 46 |    |                                                                        |        |
| 47 |    |                                                                        |        |
| 48 |    |                                                                        |        |
| 49 |    |                                                                        |        |
| 50 |    |                                                                        |        |
| 51 |    |                                                                        |        |
| 52 |    |                                                                        |        |
| 53 |    |                                                                        |        |
| 54 |    |                                                                        |        |
| 55 |    |                                                                        |        |
| 56 |    |                                                                        |        |
| 57 |    |                                                                        |        |
| 58 |    |                                                                        |        |
| 59 |    |                                                                        |        |
| 60 |    |                                                                        |        |



1  
2  
3  
4  
5  
6  
7  
8  
9  
10  
11  
12  
13  
14  
15  
16  
17  
18  
19  
20  
21  
22  
23  
24  
25  
26  
27  
28  
29  
30  
31  
32  
33  
34  
35  
36  
37  
38  
39  
40  
41  
42  
43  
44  
45  
46  
47  
48  
49  
50  
51  
52  
53  
54  
55  
56  
57  
58  
59  
60

### Medline (via PubMed): 4 April 2018

| #  | Searches                                                                                                                                                                                                                                                                                                                                                                                                                                               | Results |
|----|--------------------------------------------------------------------------------------------------------------------------------------------------------------------------------------------------------------------------------------------------------------------------------------------------------------------------------------------------------------------------------------------------------------------------------------------------------|---------|
| 1  | Dementia/ or exp Alzheimer Disease/                                                                                                                                                                                                                                                                                                                                                                                                                    | 118622  |
| 2  | Cognitive Dysfunction/                                                                                                                                                                                                                                                                                                                                                                                                                                 | 7904    |
| 3  | Cognition/                                                                                                                                                                                                                                                                                                                                                                                                                                             | 82628   |
| 4  | Cognitive Reserve/                                                                                                                                                                                                                                                                                                                                                                                                                                     | 388     |
| 5  | (dementia or alzheimer*).ti,ab.                                                                                                                                                                                                                                                                                                                                                                                                                        | 179042  |
| 6  | ((cognit* or memory or mental) adj3 (impair* or decline* or deficit* or reduc* or function*)).ti,ab.                                                                                                                                                                                                                                                                                                                                                   | 171766  |
| 7  | or/1-6                                                                                                                                                                                                                                                                                                                                                                                                                                                 | 378437  |
| 8  | exp Leisure Activities/                                                                                                                                                                                                                                                                                                                                                                                                                                | 207917  |
| 9  | leisure.ti,ab.                                                                                                                                                                                                                                                                                                                                                                                                                                         | 13201   |
| 10 | (hobby or hobbies).ti,ab.                                                                                                                                                                                                                                                                                                                                                                                                                              | 1472    |
| 11 | free time.ti,ab.                                                                                                                                                                                                                                                                                                                                                                                                                                       | 1429    |
| 12 | Recreation.ti,ab.                                                                                                                                                                                                                                                                                                                                                                                                                                      | 4900    |
| 13 | (in-door or out-door or indoor or outdoor).ti.                                                                                                                                                                                                                                                                                                                                                                                                         | 9232    |
| 14 | (garden* or horticultur*).ti.                                                                                                                                                                                                                                                                                                                                                                                                                          | 3312    |
| 15 | (play* or game? or gaming).ti.                                                                                                                                                                                                                                                                                                                                                                                                                         | 47658   |
| 16 | (creativ* or painting or drawing or reading).ti.                                                                                                                                                                                                                                                                                                                                                                                                       | 24235   |
| 17 | (voluntary or volunteer* or extracurricular).ti.                                                                                                                                                                                                                                                                                                                                                                                                       | 32218   |
| 18 | (cognitiv* adj2 (activity or activities)).ti.                                                                                                                                                                                                                                                                                                                                                                                                          | 521     |
| 19 | or/8-18                                                                                                                                                                                                                                                                                                                                                                                                                                                | 322366  |
| 20 | 7 and 19                                                                                                                                                                                                                                                                                                                                                                                                                                               | 9826    |
| 21 | exp age groups/ not (exp aged/ or middle aged/)                                                                                                                                                                                                                                                                                                                                                                                                        | 3685197 |
| 22 | 20 not 21                                                                                                                                                                                                                                                                                                                                                                                                                                              | 6996    |
| 23 | (systematic or structured or evidence or trials).ti. and ((review or overview or look or examination or update* or summary).ti. or review.pt.)                                                                                                                                                                                                                                                                                                         | 126873  |
| 24 | (0266-4623 or 1469-493X or 1366-5278 or 1530-440X).is.                                                                                                                                                                                                                                                                                                                                                                                                 | 15689   |
| 25 | meta-analysis.pt. or Network Meta-Analysis/ or (meta-analys* or meta analys* or metaanalys* or meta synth* or meta-synth* or metasynt*).tw,hw.                                                                                                                                                                                                                                                                                                         | 151505  |
| 26 | review.pt. and ((medline or medlars or embase or pubmed or scisearch or psychinfo or psycinfo or psychlit or psyclit or cinahl or electronic database* or bibliographic database* or computeri#ed database* or online database* or pooling or pooled or mantel haenszel or peto or dersimonian or der simonian or fixed effect or ((hand adj2 search*) or (manual* adj2 search*))).tw,hw. or (retraction of publication or retracted publication).pt.) | 125835  |
| 27 | ((systematic or meta) adj2 (analys* or review)).ti,kf. or ((systematic* or quantitativ* or methodologic*) adj5 (review* or overview*)).tw,hw. or (quantitativ\$ adj5 synthesis\$).tw,hw.                                                                                                                                                                                                                                                               | 184250  |

|    |                                                                                                                                                                                               |         |
|----|-----------------------------------------------------------------------------------------------------------------------------------------------------------------------------------------------|---------|
| 28 | (integrative research review* or research integration).tw. or scoping review?.ti,kf. or (review.ti,kf,pt. and (trials as topic or studies as topic).hw.) or (evidence adj3 review*).ti,ab,kf. | 168915  |
| 29 | 23 or 24 or 25 or 26 or 27 or 28                                                                                                                                                              | 425049  |
| 30 | 29 not (case report/ or letter.pt.)                                                                                                                                                           | 414173  |
| 31 | 22 and 30                                                                                                                                                                                     | 283     |
| 32 | ("2017/07*" or "2017/08*" or "2017/09*" or "2017/1*" or 2018*).dt.                                                                                                                            | 947449  |
| 33 | (201707* or 201708* or 201709* or 20171* or 2018*).ed.                                                                                                                                        | 745570  |
| 34 | 32 or 33                                                                                                                                                                                      | 1543513 |
| 35 | 31 and 34                                                                                                                                                                                     | 53      |
| 36 | remove duplicates from 35                                                                                                                                                                     | 52      |

## Embase: 17 Juli 2017

| No. | Query                                                                                                                                                                                  | Results |
|-----|----------------------------------------------------------------------------------------------------------------------------------------------------------------------------------------|---------|
| #1  | 'alzheimer disease'/exp                                                                                                                                                                | 158632  |
| #2  | 'mild cognitive impairment'/exp                                                                                                                                                        | 17483   |
| #3  | 'dementia'/de                                                                                                                                                                          | 98402   |
| #4  | dementia:ti,ab OR alzheimer*:ti,ab                                                                                                                                                     | 230453  |
| #5  | ((cognit* OR memory OR mental) NEAR/3 (impair* OR decline* OR deficit* OR reduc* OR function*)):ti,ab                                                                                  | 226651  |
| #6  | #1 OR #2 OR #3 OR #4 OR #5                                                                                                                                                             | 440912  |
| #7  | 'recreation'/exp                                                                                                                                                                       | 57806   |
| #8  | leisure:ti,ab                                                                                                                                                                          | 16016   |
| #9  | hobby:ti,ab OR hobbies:ti,ab                                                                                                                                                           | 2028    |
| #10 | 'free time':ti,ab                                                                                                                                                                      | 1939    |
| #11 | recreation:ti,ab                                                                                                                                                                       | 6442    |
| #12 | 'in door':ti OR 'out door':ti OR indoor:ti OR outdoor:ti                                                                                                                               | 11551   |
| #13 | garden*:ti OR horticultur*:ti                                                                                                                                                          | 3581    |
| #14 | play*:ti OR game:ti OR games:ti OR gaming:ti                                                                                                                                           | 52543   |
| #15 | creativ*:ti OR painting:ti OR drawing:ti OR reading:ti                                                                                                                                 | 25887   |
| #16 | voluntary:ti OR volunteer*:ti OR extracurricular:ti                                                                                                                                    | 38793   |
| #17 | #7 OR #8 OR #9 OR #10 OR #11 OR #12 OR #13 OR #14 OR #15 OR #16                                                                                                                        | 196912  |
| #18 | #6 AND #17                                                                                                                                                                             | 5027    |
| #19 | 'groups by age'/exp AND ('middle aged'/exp OR 'aged'/exp)                                                                                                                              | 3258589 |
| #20 | #18 NOT #19                                                                                                                                                                            | 3277    |
| #21 | systematic review'/exp OR 'meta analysis'/exp                                                                                                                                          | 211886  |
| #22 | meta analys*:ti,ab OR metaanalys*:ti,ab OR 'meta synth*':ti,ab OR metasynth*:ti,ab OR ((systematic* OR quantitativ* OR methodologic*) NEAR/5 (review* OR overview* OR synthes*)):ti,ab | 239389  |
| #23 | systematic:ti OR structured:ti OR evidence:ti OR trials:ti AND (review:ti OR overview:ti OR look:ti OR examination:ti OR update*:ti OR summary:ti)                                     | 98173   |
| #24 | #21 OR #22 OR #23                                                                                                                                                                      | 306796  |
| #25 | #24 NOT ('case report'/exp OR 'case study'/exp)                                                                                                                                        | 301911  |
| #26 | #20 AND #25                                                                                                                                                                            | 128     |

## Embase: 4 April 2018

| No. | Query                                                                                                                                                                                     | Results |
|-----|-------------------------------------------------------------------------------------------------------------------------------------------------------------------------------------------|---------|
| #1  | 'alzheimer disease'/exp                                                                                                                                                                   | 167669  |
| #2  | 'mild cognitive impairment'/exp OR 'dementia'/de                                                                                                                                          | 115768  |
| #3  | 'cognitive reserve'/de                                                                                                                                                                    | 1341    |
| #4  | dementia:ti,ab OR alzheimer*:ti,ab                                                                                                                                                        | 245434  |
| #5  | ((cognit* OR memory OR mental) NEAR/3 (impair* OR decline* OR deficit* OR reduc* OR function*)):ti,ab                                                                                     | 244167  |
| #6  | #1 OR #2 OR #3 OR #4 OR #5                                                                                                                                                                | 470026  |
| #7  | 'recreation'/exp                                                                                                                                                                          | 61588   |
| #8  | leisure:ti,ab                                                                                                                                                                             | 16979   |
| #9  | hobby:ti,ab OR hobbies:ti,ab                                                                                                                                                              | 2145    |
| #10 | 'free time':ti,ab                                                                                                                                                                         | 2061    |
| #11 | recreation:ti,ab                                                                                                                                                                          | 6767    |
| #12 | 'in door':ti OR 'out door':ti OR indoor:ti OR outdoor:ti                                                                                                                                  | 12183   |
| #13 | garden*:ti OR horticultur*:ti                                                                                                                                                             | 3745    |
| #14 | play*:ti OR game:ti OR games:ti OR gaming:ti                                                                                                                                              | 55639   |
| #15 | creativ*:ti OR painting:ti OR drawing:ti OR reading:ti                                                                                                                                    | 26738   |
| #16 | voluntary:ti OR volunteer*:ti OR extracurricular:ti OR ((cognitiv* NEAR/2 (activity OR activities)):ti)                                                                                   | 39956   |
| #17 | #7 OR #8 OR #9 OR #10 OR #11 OR #12 OR #13 OR #14 OR #15 OR #16                                                                                                                           | 207154  |
| #18 | #6 AND #17                                                                                                                                                                                | 5442    |
| #19 | 'groups by age'/exp AND ('middle aged'/exp OR 'aged'/exp)                                                                                                                                 | 345120  |
|     |                                                                                                                                                                                           | 2       |
| #20 | #18 NOT #19                                                                                                                                                                               | 3533    |
| #21 | 'systematic review'/exp OR 'meta analysis'/exp                                                                                                                                            | 239710  |
| #22 | 'meta analys*':ti,ab OR metaanalys*:ti,ab OR 'meta synth*':ti,ab OR metasynt*:ti,ab OR (((systematic* OR quantitativ* OR methodologic*) NEAR/5 (review* OR overview* OR synthes*)):ti,ab) | 267896  |
| #23 | (systematic:ti OR structured:ti OR evidence:ti OR trials:ti) AND (review:ti OR overview:ti OR look:ti OR examination:ti OR update*:ti OR summary:ti)                                      | 112383  |
| #24 | #21 OR #22 OR #23                                                                                                                                                                         | 342728  |
| #25 | #24 NOT ('case report'/exp OR 'case study'/exp)                                                                                                                                           | 337160  |
| #26 | #20 AND #25                                                                                                                                                                               | 145     |
| #27 | #26 AND [1-7-2017]/sd NOT [5-4-2018]/sd                                                                                                                                                   | 26      |
| #28 | #26 AND [2017-2018]/py                                                                                                                                                                    | 30      |
| #29 | #27 OR #28                                                                                                                                                                                | 35      |

## CINAHL (Ebsco): 17 July 2017

| #   | Query                                                                                                                                                                                                  | Limiters/Expanders                      | Results |
|-----|--------------------------------------------------------------------------------------------------------------------------------------------------------------------------------------------------------|-----------------------------------------|---------|
| S1  | (MH "Alzheimer's Disease") OR (MH "Dementia")                                                                                                                                                          | Search modes - Find all my search terms | 38,358  |
| S2  | dementia OR alzheimer*                                                                                                                                                                                 | Search modes - Find all my search terms | 47,332  |
| S3  | ((cognit* OR memory OR mental) N3 (impair* OR decline* OR deficit* OR reduc* OR function*))                                                                                                            | Search modes - Find all my search terms | 30,037  |
| S4  | S1 OR S2 OR S3                                                                                                                                                                                         | Search modes - Find all my search terms | 68,971  |
| S5  | (MH "Leisure Activities+")                                                                                                                                                                             | Search modes - Find all my search terms | 36,998  |
| S6  | leisure OR hobby OR hobbies OR "free time" OR Recreation                                                                                                                                               | Search modes - Find all my search terms | 11,096  |
| S7  | TI in-door OR out-door OR indoor OR outdoor OR garden* OR horticultur* OR play* OR game OR games OR gaming OR creativ* OR painting OR drawing OR reading OR voluntary OR volunteer* OR extracurricular | Search modes - Find all my search terms | 31,628  |
| S8  | S5 OR S6 OR S7                                                                                                                                                                                         | Search modes - Find all my search terms | 69,497  |
| S9  | S4 AND S8                                                                                                                                                                                              | Search modes - Find all my search terms | 2,053   |
| S10 | MH "Animal Studies"                                                                                                                                                                                    | Search modes - Find all my search terms | 41,599  |
| S11 | S9 NOT S10                                                                                                                                                                                             | Search modes - Find all my search terms | 2,051   |
| S12 | MH "Named Groups by Age+" NOT (MH "Middle Age" OR MH "Aged+")                                                                                                                                          | Search modes - Find all my search terms | 564,745 |
| S13 | S11 NOT S12                                                                                                                                                                                            | Search modes - Find all my search terms | 1,855   |
| S14 | (MH "Systematic Review") OR (MH "Meta Analysis")                                                                                                                                                       | Search modes - Find all my search terms | 42,089  |
| S15 | meta-analys* OR meta analys* OR metaanalys* OR meta synth* OR meta-synth* OR metasynt*                                                                                                                 | Search modes - Boolean/Phrase           | 31,338  |
| S16 | (systematic* OR quantitativ* OR methodologic*) N4 (review* OR overview* OR synthes*)                                                                                                                   | Search modes - Boolean/Phrase           | 55,272  |
| S17 | TI (systematic OR structured OR evidence OR trials) AND (review OR overview OR look OR examination OR update* OR summary)                                                                              | Search modes - Boolean/Phrase           | 27,392  |
| S18 | S14 OR S15 OR S16 OR S17                                                                                                                                                                               | Search modes - Find all my search terms | 72,333  |
| S19 | S13 AND S18                                                                                                                                                                                            | Search modes - Find all my search terms | 71      |

**CINAHL (Ebsco): 4 April 2018**

| #   | Query                                                                                                                                                                                                                                                                               | Limiters/Expanders                      | Results |
|-----|-------------------------------------------------------------------------------------------------------------------------------------------------------------------------------------------------------------------------------------------------------------------------------------|-----------------------------------------|---------|
| S1  | (MH "Alzheimer's Disease")<br>OR (MH "Dementia")                                                                                                                                                                                                                                    | Search modes - Find all my search terms | 40,163  |
| S2  | dementia OR alzheimer*                                                                                                                                                                                                                                                              | Search modes - Find all my search terms | 50,045  |
| S3  | ((cognit* OR memory OR<br>mental) N3 (impair* OR<br>decline* OR deficit* OR<br>reduc* OR function*))                                                                                                                                                                                | Search modes - Find all my search terms | 32,819  |
| S4  | S1 OR S2 OR S3                                                                                                                                                                                                                                                                      | Search modes - Find all my search terms | 73,730  |
| S5  | (MH "Leisure Activities+")                                                                                                                                                                                                                                                          | Search modes - Find all my search terms | 39,894  |
| S6  | leisure OR hobby OR hobbies<br>OR "free time" OR<br>Recreation                                                                                                                                                                                                                      | Search modes - Find all my search terms | 11,740  |
| S7  | TI (in-door OR out-door OR<br>indoor OR outdoor OR<br>garden* OR horticultur* OR<br>play* OR game OR games OR<br>gaming OR creativ* OR<br>painting OR drawing OR<br>reading OR oluntary OR<br>volunteer* OR<br>extracurricular) OR TI<br>(cognitiv* W1 (activity OR<br>activities)) | Search modes - Find all my search terms | 33,266  |
| S8  | S5 OR S6 OR S7                                                                                                                                                                                                                                                                      | Search modes - Find all my search terms | 73,940  |
| S9  | S4 AND S8                                                                                                                                                                                                                                                                           | Search modes - Find all my search terms | 2,298   |
| S10 | MH "Animal Studies"                                                                                                                                                                                                                                                                 | Search modes - Find all my search terms | 43,752  |
| S11 | S9 NOT S10                                                                                                                                                                                                                                                                          | Search modes - Find all my search terms | 2,295   |
| S12 | MH "Named Groups by<br>Age+" NOT (MH "Middle<br>Age" OR MH "Aged+")                                                                                                                                                                                                                 | Search modes - Find all my search terms | 594,058 |
| S13 | S11 NOT S12                                                                                                                                                                                                                                                                         | Search modes - Find all my search terms | 2,079   |
| S14 | (MH "Systematic Review")<br>OR (MH "Meta Analysis")                                                                                                                                                                                                                                 | Search modes - Find all my search terms | 50,503  |
| S15 | meta-analys* OR meta<br>analys* OR metaanalys* OR                                                                                                                                                                                                                                   | Search modes - Boolean/Phrase           | 34,556  |

|     |                                                                                                                                       |                                                                                 |         |
|-----|---------------------------------------------------------------------------------------------------------------------------------------|---------------------------------------------------------------------------------|---------|
|     | meta synth* OR meta-synth*<br>OR metasynt*                                                                                            |                                                                                 |         |
| S16 | (systematic* OR quantitativ*<br>OR methodologic*) N4<br>(review* OR overview* OR<br>synthes*)                                         | Search modes - Boolean/Phrase                                                   | 63,373  |
| S17 | TI (systematic OR structured<br>OR evidence OR trials) AND<br>(review OR overview OR look<br>OR examination OR update*<br>OR summary) | Search modes - Boolean/Phrase                                                   | 30,586  |
| S18 | S14 OR S15 OR S16 OR S17                                                                                                              | Search modes - Find all my search terms                                         | 81,245  |
| S19 | S13 AND S18                                                                                                                           | Search modes - Find all my search terms                                         | 93      |
| S20 |                                                                                                                                       | Limiters - Published Date: 20170701-<br>Search modes - Find all my search terms | 156,794 |
| S21 | EM 20170701-                                                                                                                          | Search modes - Find all my search terms                                         | 208,855 |
| S22 | S20 OR S21                                                                                                                            | Search modes - Find all my search terms                                         | 253,372 |
| S23 | S22 AND S19                                                                                                                           | Search modes - Find all my search terms                                         | 27      |

1  
2  
3  
4  
5  
6  
7  
8  
9  
10  
11  
12  
13  
14  
15  
16  
17  
18  
19  
20  
21  
22  
23  
24  
25  
26  
27  
28  
29  
30  
31  
32  
33  
34  
35  
36  
37  
38  
39  
40  
41  
42  
43  
44  
45  
46  
47  
48  
49  
50  
51  
52  
53  
54  
55  
56  
57  
58  
59  
60

### PsycINFO (Ebsco): 18 July 2017

| #   | Query                                                                                                                                                                                                                                                                                                                                                                                                                | Limiters/Expanders                      | Results   |
|-----|----------------------------------------------------------------------------------------------------------------------------------------------------------------------------------------------------------------------------------------------------------------------------------------------------------------------------------------------------------------------------------------------------------------------|-----------------------------------------|-----------|
| S1  | DE "Alzheimer's Disease"                                                                                                                                                                                                                                                                                                                                                                                             | Search modes - Find all my search terms | 39,908    |
| S2  | DE "Senile Dementia"                                                                                                                                                                                                                                                                                                                                                                                                 | Search modes - Find all my search terms | 1,063     |
| S3  | DE "Cognitive Impairment"                                                                                                                                                                                                                                                                                                                                                                                            | Search modes - Find all my search terms | 30,416    |
| S4  | dementia OR alzheimer*                                                                                                                                                                                                                                                                                                                                                                                               | Search modes - Find all my search terms | 94,008    |
| S5  | ((cognit* OR memory OR mental) N3 (impair* OR decline* OR deficit* OR reduc* OR function*))                                                                                                                                                                                                                                                                                                                          | Search modes - Find all my search terms | 138,651   |
| S6  | S1 OR S2 OR S3 OR S4 OR S5                                                                                                                                                                                                                                                                                                                                                                                           | Search modes - Find all my search terms | 200,033   |
| S7  | (((((DE "Leisure Time") OR (DE "Hobbies")) AND (DE "Recreation" OR DE "Clubs (Social Organizations)" OR DE "Traveling" OR DE "Vacationing"))) OR (DE "Gambling")) AND (DE "Games" OR DE "Chess" OR DE "Computer Games"))                                                                                                                                                                                             | Search modes - Find all my search terms | 347       |
| S8  | leisure OR hobby OR hobbies OR "free time" OR Recreation                                                                                                                                                                                                                                                                                                                                                             | Search modes - Find all my search terms | 37,212    |
| S9  | TI (in-door OR out-door OR indoor OR outdoor OR garden* OR horticultur* OR play* OR game OR games OR gaming OR creativ* OR painting OR drawing OR reading OR voluntary OR volunteer* OR extracurricular) OR SU (in-door OR out-door OR indoor OR outdoor OR garden* OR horticultur* OR play* OR game OR games OR gaming OR creativ* OR painting OR drawing OR reading OR voluntary OR volunteer* OR extracurricular) | Search modes - Find all my search terms | 175,457   |
| S10 | S7 OR S8 OR S9                                                                                                                                                                                                                                                                                                                                                                                                       | Search modes - Find all my search terms | 207,264   |
| S11 | S6 AND S10                                                                                                                                                                                                                                                                                                                                                                                                           | Search modes - Find all my search terms | 5,662     |
| S12 | (ZG "adolescence (13-17 yrs)" or ZG "adulthood (18 yrs & older)" or ZG "childhood (birth-12 yrs)") not (ZG "aged (65 yrs & older)" or ZG "middle age (40-64 yrs)")                                                                                                                                                                                                                                                   | Search modes - Find all my search terms | 1,627,211 |
| S13 | S11 NOT S12                                                                                                                                                                                                                                                                                                                                                                                                          | Search modes - Find all my search terms | 3,357     |
| S14 | (DE "Animals") OR TI (rat OR rats OR mouse OR mice OR dog OR dogs) OR SU (rat OR rats OR mouse OR mice OR dog OR dogs)                                                                                                                                                                                                                                                                                               | Search modes - Find all my search terms | 311,593   |
| S15 | S13 NOT S14                                                                                                                                                                                                                                                                                                                                                                                                          | Search modes - Find all my search terms | 3,212     |



|    |     |                                                                                        |                                                |
|----|-----|----------------------------------------------------------------------------------------|------------------------------------------------|
| 1  |     |                                                                                        |                                                |
| 2  |     |                                                                                        |                                                |
| 3  | S16 | (DE "Drug Therapy")                                                                    | Search modes - Find all my search terms 127,11 |
| 4  |     |                                                                                        |                                                |
| 5  | S17 | S15 NOT S16                                                                            | Search modes - Find all my search terms 3,161  |
| 6  |     |                                                                                        |                                                |
| 7  | S18 | DE "Meta Analysis"                                                                     | Search modes - Find all my search terms 4,026  |
| 8  |     |                                                                                        |                                                |
| 9  | S19 | meta-analys* OR meta analys* OR metaanalys* OR meta synth* OR meta-synth* OR metasynt* | Search modes - Boolean/Phrase 27,695           |
| 10 |     |                                                                                        |                                                |
| 11 | S20 | (systematic* OR quantitativ* OR methodologic*)                                         | Search modes - Find all my search terms 27,454 |
| 12 |     | N4 (review* OR overview* OR synthes*)                                                  |                                                |
| 13 | S21 | TI (systematic OR structured OR evidence OR trials)                                    | Search modes - Find all my search terms 16,949 |
| 14 |     | AND TI (review OR overview OR look OR examination OR update* OR summary)               |                                                |
| 15 | S22 | S18 OR S19 OR S20 OR S21                                                               | Search modes - Find all my search terms 51,681 |
| 16 |     |                                                                                        |                                                |
| 17 | S23 | S17 AND S22                                                                            | Search modes - Find all my search terms 73     |
| 18 |     |                                                                                        |                                                |
| 19 |     |                                                                                        |                                                |
| 20 |     |                                                                                        |                                                |
| 21 |     |                                                                                        |                                                |
| 22 |     |                                                                                        |                                                |
| 23 |     |                                                                                        |                                                |
| 24 |     |                                                                                        |                                                |
| 25 |     |                                                                                        |                                                |
| 26 |     |                                                                                        |                                                |
| 27 |     |                                                                                        |                                                |
| 28 |     |                                                                                        |                                                |
| 29 |     |                                                                                        |                                                |
| 30 |     |                                                                                        |                                                |
| 31 |     |                                                                                        |                                                |
| 32 |     |                                                                                        |                                                |
| 33 |     |                                                                                        |                                                |
| 34 |     |                                                                                        |                                                |
| 35 |     |                                                                                        |                                                |
| 36 |     |                                                                                        |                                                |
| 37 |     |                                                                                        |                                                |
| 38 |     |                                                                                        |                                                |
| 39 |     |                                                                                        |                                                |
| 40 |     |                                                                                        |                                                |
| 41 |     |                                                                                        |                                                |
| 42 |     |                                                                                        |                                                |
| 43 |     |                                                                                        |                                                |
| 44 |     |                                                                                        |                                                |
| 45 |     |                                                                                        |                                                |
| 46 |     |                                                                                        |                                                |
| 47 |     |                                                                                        |                                                |
| 48 |     |                                                                                        |                                                |
| 49 |     |                                                                                        |                                                |
| 50 |     |                                                                                        |                                                |
| 51 |     |                                                                                        |                                                |
| 52 |     |                                                                                        |                                                |
| 53 |     |                                                                                        |                                                |
| 54 |     |                                                                                        |                                                |
| 55 |     |                                                                                        |                                                |
| 56 |     |                                                                                        |                                                |
| 57 |     |                                                                                        |                                                |
| 58 |     |                                                                                        |                                                |
| 59 |     |                                                                                        |                                                |
| 60 |     |                                                                                        |                                                |

1  
2  
3  
4  
5  
6  
7  
8  
9  
10  
11  
12  
13  
14  
15  
16  
17  
18  
19  
20  
21  
22  
23  
24  
25  
26  
27  
28  
29  
30  
31  
32  
33  
34  
35  
36  
37  
38  
39  
40  
41  
42  
43  
44  
45  
46  
47  
48  
49  
50  
51  
52  
53  
54  
55  
56  
57  
58  
59  
60

### PsycINFO (Ebsco): 5 April 2018

| #   | Query                                                                                                                                                                                                                                                                                                                                                                                                                                                                      | Limiters/Expanders                      | Results   |
|-----|----------------------------------------------------------------------------------------------------------------------------------------------------------------------------------------------------------------------------------------------------------------------------------------------------------------------------------------------------------------------------------------------------------------------------------------------------------------------------|-----------------------------------------|-----------|
| S1  | DE "Alzheimer's Disease"                                                                                                                                                                                                                                                                                                                                                                                                                                                   | Search modes - Find all my search terms | 41,959    |
| S2  | DE "Senile Dementia" OR DE "Cognitive Impairment"                                                                                                                                                                                                                                                                                                                                                                                                                          | Search modes - Find all my search terms | 33,077    |
| S3  | DE "Cognitive Reserve"                                                                                                                                                                                                                                                                                                                                                                                                                                                     | Search modes - Find all my search terms | 353       |
| S4  | dementia OR alzheimer*                                                                                                                                                                                                                                                                                                                                                                                                                                                     | Search modes - Find all my search terms | 98,945    |
| S5  | ((cognit* OR memory OR mental) N3 (impair* OR decline* OR deficit* OR reduc* OR function*))                                                                                                                                                                                                                                                                                                                                                                                | Search modes - Find all my search terms | 146,379   |
| S6  | S1 OR S2 OR S3 OR S4 OR S5                                                                                                                                                                                                                                                                                                                                                                                                                                                 | Search modes - Find all my search terms | 210,573   |
| S7  | (((((DE "Leisure Time") OR (DE "Hobbies")) AND (DE "Recreation" OR DE "Clubs (Social Organizations)" OR DE "Traveling" OR DE "Vacationing"))) OR (DE "Gambling"))) AND (DE "Games" OR DE "Chess" OR DE "Computer Games"))                                                                                                                                                                                                                                                  | Search modes - Find all my search terms | 358       |
| S8  | leisure OR hobby OR hobbies OR "free time" OR Recreation                                                                                                                                                                                                                                                                                                                                                                                                                   | Search modes - Find all my search terms | 39,017    |
| S9  | TI (in-door OR out-door OR indoor OR outdoor OR garden* OR horticultur* OR play* OR game OR games OR gaming OR creativ* OR painting OR drawing OR reading OR voluntary OR volunteer* OR extracurricular OR (cognitiv* W1 activit*)) OR SU (in-door OR out-door OR indoor OR outdoor OR garden* OR horticultur* OR play* OR game OR games OR gaming OR creativ* OR painting OR drawing OR reading OR voluntary OR volunteer* OR extracurricular OR (cognitiv* W1 activit*)) | Search modes - Find all my search terms | 182,299   |
| S10 | S7 OR S8 OR S9                                                                                                                                                                                                                                                                                                                                                                                                                                                             | Search modes - Find all my search terms | 215,667   |
| S11 | S6 AND S10                                                                                                                                                                                                                                                                                                                                                                                                                                                                 | Search modes - Find all my search terms | 6,166     |
| S12 | (ZG "adolescence (13-17 yrs)" or ZG "adulthood (18 yrs & older)" or ZG "childhood (birth-12 yrs)") not (ZG "aged (65 yrs & older)" or ZG "middle age (40-64 yrs)")                                                                                                                                                                                                                                                                                                         | Search modes - Find all my search terms | 1,695,146 |

|    |     |                                                                                                                              |                                         |         |
|----|-----|------------------------------------------------------------------------------------------------------------------------------|-----------------------------------------|---------|
| 1  |     |                                                                                                                              |                                         |         |
| 2  |     |                                                                                                                              |                                         |         |
| 3  | S13 | S11 NOT S12                                                                                                                  | Search modes - Find all my search terms | 3,706   |
| 4  |     |                                                                                                                              |                                         |         |
| 5  | S14 | (DE "Animals") OR TI (rat OR rats OR mouse OR mice OR dog OR dogs) OR SU (rat OR rats OR mouse OR mice OR dog OR dogs)       | Search modes - Find all my search terms | 318,343 |
| 6  |     |                                                                                                                              |                                         |         |
| 7  |     |                                                                                                                              |                                         |         |
| 8  |     |                                                                                                                              |                                         |         |
| 9  |     |                                                                                                                              |                                         |         |
| 10 | S15 | S13 NOT S14                                                                                                                  | Search modes - Find all my search terms | 3,539   |
| 11 |     |                                                                                                                              |                                         |         |
| 12 | S16 | (DE "Drug Therapy")                                                                                                          | Search modes - Find all my search terms | 129,812 |
| 13 |     |                                                                                                                              |                                         |         |
| 14 |     |                                                                                                                              |                                         |         |
| 15 | S17 | S15 NOT S16                                                                                                                  | Search modes - Find all my search terms | 3,481   |
| 16 |     |                                                                                                                              |                                         |         |
| 17 | S18 | DE "Meta Analysis"                                                                                                           | Search modes - Find all my search terms | 4,152   |
| 18 |     |                                                                                                                              |                                         |         |
| 19 | S19 | meta-analys* OR meta analys* OR metaanalys* OR meta synth* OR meta-synth* OR metasynth*                                      | Search modes - Boolean/Phrase           | 30,127  |
| 20 |     |                                                                                                                              |                                         |         |
| 21 |     |                                                                                                                              |                                         |         |
| 22 |     |                                                                                                                              |                                         |         |
| 23 | S20 | (systematic* OR quantitativ* OR methodologic*) N4 (review* OR overview* OR synthes*)                                         | Search modes - Find all my search terms | 30,748  |
| 24 |     |                                                                                                                              |                                         |         |
| 25 |     |                                                                                                                              |                                         |         |
| 26 | S21 | TI (systematic OR structured OR evidence OR trials) AND TI (review OR overview OR look OR examination OR update* OR summary) | Search modes - Find all my search terms | 19,166  |
| 27 |     |                                                                                                                              |                                         |         |
| 28 |     |                                                                                                                              |                                         |         |
| 29 |     |                                                                                                                              |                                         |         |
| 30 |     |                                                                                                                              |                                         |         |
| 31 | S22 | S18 OR S19 OR S20 OR S21                                                                                                     | Search modes - Find all my search terms | 56,448  |
| 32 |     |                                                                                                                              |                                         |         |
| 33 | S23 | S17 AND S22                                                                                                                  | Search modes - Find all my search terms | 84      |
| 34 |     |                                                                                                                              |                                         |         |
| 35 | S24 | RD 201707-                                                                                                                   | Search modes - Find all my search terms | 148,956 |
| 36 |     |                                                                                                                              |                                         |         |
| 37 |     |                                                                                                                              |                                         |         |
| 38 | S25 | DT 201707-                                                                                                                   | Search modes - Find all my search terms | 100,982 |
| 39 |     |                                                                                                                              |                                         |         |
| 40 | S26 | S24 OR S25                                                                                                                   | Search modes - Find all my search terms | 159,715 |
| 41 |     |                                                                                                                              |                                         |         |
| 42 |     |                                                                                                                              |                                         |         |
| 43 | S27 | S23 AND S26                                                                                                                  | Search modes - Find all my search terms | 13      |
| 44 |     |                                                                                                                              |                                         |         |
| 45 |     |                                                                                                                              |                                         |         |
| 46 |     |                                                                                                                              |                                         |         |
| 47 |     |                                                                                                                              |                                         |         |
| 48 |     |                                                                                                                              |                                         |         |
| 49 |     |                                                                                                                              |                                         |         |
| 50 |     |                                                                                                                              |                                         |         |
| 51 |     |                                                                                                                              |                                         |         |
| 52 |     |                                                                                                                              |                                         |         |
| 53 |     |                                                                                                                              |                                         |         |
| 54 |     |                                                                                                                              |                                         |         |
| 55 |     |                                                                                                                              |                                         |         |
| 56 |     |                                                                                                                              |                                         |         |
| 57 |     |                                                                                                                              |                                         |         |
| 58 |     |                                                                                                                              |                                         |         |
| 59 |     |                                                                                                                              |                                         |         |
| 60 |     |                                                                                                                              |                                         |         |

### Epistemonikos 18. Juli 2017

| Search                                                                                                                                                                                                                                                                                                                | Results |
|-----------------------------------------------------------------------------------------------------------------------------------------------------------------------------------------------------------------------------------------------------------------------------------------------------------------------|---------|
| (dementia OR alzheimer* OR cognitiv*) AND (leisure OR recreation OR "free time" OR hobby OR hobbies OR (title:(in-door OR out-door OR indoor OR outdoor OR garden* OR horticultur* OR play* OR game OR games OR gaming OR creativ* OR painting OR drawing OR reading OR voluntary OR volunteer* OR extracurricular))) | 273     |
| Filter: Systematic Review                                                                                                                                                                                                                                                                                             | 64      |

### Epistemonikos 18. Juli 2017

| Search                                                                                                                                                                                                                                                                                                                | Results |
|-----------------------------------------------------------------------------------------------------------------------------------------------------------------------------------------------------------------------------------------------------------------------------------------------------------------------|---------|
| (dementia OR alzheimer* OR cognitiv*) AND (leisure OR recreation OR "free time" OR hobby OR hobbies OR (title:(in-door OR out-door OR indoor OR outdoor OR garden* OR horticultur* OR play* OR game OR games OR gaming OR creativ* OR painting OR drawing OR reading OR voluntary OR volunteer* OR extracurricular))) | 368     |
| Filter: Systematic Review                                                                                                                                                                                                                                                                                             | 146     |
| Added to database: 01-07-17 to 05-04-18                                                                                                                                                                                                                                                                               | 25      |

**Cochrane Library: 18. Juli 2017**

| ID  | Search                                                                                                                  | Hits   |
|-----|-------------------------------------------------------------------------------------------------------------------------|--------|
| #1  | [mh ^Dementia] or [mh "Alzheimer Disease"]                                                                              | 4053   |
| #2  | [mh ^"Cognitive Dysfunction"]                                                                                           | 181    |
| #3  | [mh ^Cognition]                                                                                                         | 6276   |
| #4  | (dementia or alzheimer*):ti,ab,kw                                                                                       | 11879  |
| #5  | ((cognit* or memory or mental) next (impair* or decline* or deficit* or reduc* or function*)):ti,ab,kw                  | 12722  |
| #6  | {or #1-#5}                                                                                                              | 25014  |
| #7  | [mh "Leisure Activities"]                                                                                               | 15395  |
| #8  | leisure:ti,ab,kw                                                                                                        | 1481   |
| #9  | (hobby or hobbies):ti,ab,kw                                                                                             | 55     |
| #10 | "free time":ti,ab,kw                                                                                                    | 162    |
| #11 | Recreation:ti,ab,kw                                                                                                     | 615    |
| #12 | (in-door or out-door or indoor or outdoor):ti,kw                                                                        | 478    |
| #13 | (garden* or horticultur*):ti,kw                                                                                         | 106    |
| #14 | (play* or game* or gaming):ti,kw                                                                                        | 3280   |
| #15 | (creativ* or painting or drawing or reading):ti,kw                                                                      | 2913   |
| #16 | (voluntary or volunteer* or extracurricular):ti,kw                                                                      | 17942  |
| #17 | {or #7-#16}                                                                                                             | 39978  |
| #18 | #6 and #17                                                                                                              | 1551   |
| #19 | [mh "age groups"] not ([mh aged] or [mh "middle aged"])                                                                 | 104634 |
| #20 | #18 not #19 in Cochrane Reviews (Reviews and Protocols), Other Reviews, Technology Assessments and Economic Evaluations | 38     |

**Cochrane Library: 5. April 2018**

| ID  | Search                                                                                                 | Hits  |
|-----|--------------------------------------------------------------------------------------------------------|-------|
| #1  | [mh ^Dementia] or [mh "Alzheimer Disease"]                                                             | 4263  |
| #2  | [mh ^"Cognitive Dysfunction"]                                                                          | 450   |
| #3  | [mh ^Cognition]                                                                                        | 6675  |
| #4  | [mh ^"Cognitive Reserve"]                                                                              | 8     |
| #5  | (dementia or alzheimer*):ti,ab,kw                                                                      | 13099 |
| #6  | ((cognit* or memory or mental) next (impair* or decline* or deficit* or reduc* or function*)):ti,ab,kw | 14315 |
| #7  | {or #1-#6}                                                                                             | 27581 |
| #8  | [mh "Leisure Activities"]                                                                              | 16504 |
| #9  | leisure:ti,ab,kw                                                                                       | 1683  |
| #10 | (hobby or hobbies):ti,ab,kw                                                                            | 59    |
| #11 | free time:ti,ab,kw                                                                                     | 169   |
| #12 | Recreation:ti,ab,kw                                                                                    | 674   |
| #13 | (in-door or out-door or indoor or outdoor):ti,kw                                                       | 541   |

|    |                                                                         |        |
|----|-------------------------------------------------------------------------|--------|
| 1  |                                                                         |        |
| 2  |                                                                         |        |
| 3  | #14 (garden* or horticultur*):ti,kw                                     | 125    |
| 4  | #15 (play* or game* or gaming):ti,kw                                    | 3653   |
| 5  | #16 (creativ* or painting or drawing or reading):ti,kw                  | 3482   |
| 6  | #17 (voluntary or volunteer* or extracurricular):ti,kw                  | 20037  |
| 7  | #18 (cognitiv* near/2 (activity or activities)):ti,kw                   | 80     |
| 8  | #19 {or #8-#18}                                                         | 44252  |
| 9  | #20 #7 and #19                                                          | 1838   |
| 10 | #21 [mh "age groups"] not ([mh aged] or [mh "middle aged"])             | 109483 |
| 11 | #22 #20 not #21 Publication Year from 2017 to 2018, in Cochrane Reviews | 1      |
| 12 | (Reviews and Protocols) and Technology Assessments                      |        |
| 13 |                                                                         |        |
| 14 |                                                                         |        |
| 15 |                                                                         |        |
| 16 |                                                                         |        |
| 17 |                                                                         |        |
| 18 |                                                                         |        |
| 19 |                                                                         |        |
| 20 |                                                                         |        |
| 21 |                                                                         |        |
| 22 |                                                                         |        |
| 23 |                                                                         |        |
| 24 |                                                                         |        |
| 25 |                                                                         |        |
| 26 |                                                                         |        |
| 27 |                                                                         |        |
| 28 |                                                                         |        |
| 29 |                                                                         |        |
| 30 |                                                                         |        |
| 31 |                                                                         |        |
| 32 |                                                                         |        |
| 33 |                                                                         |        |
| 34 |                                                                         |        |
| 35 |                                                                         |        |
| 36 |                                                                         |        |
| 37 |                                                                         |        |
| 38 |                                                                         |        |
| 39 |                                                                         |        |
| 40 |                                                                         |        |
| 41 |                                                                         |        |
| 42 |                                                                         |        |
| 43 |                                                                         |        |
| 44 |                                                                         |        |
| 45 |                                                                         |        |
| 46 |                                                                         |        |
| 47 |                                                                         |        |
| 48 |                                                                         |        |
| 49 |                                                                         |        |
| 50 |                                                                         |        |
| 51 |                                                                         |        |
| 52 |                                                                         |        |
| 53 |                                                                         |        |
| 54 |                                                                         |        |
| 55 |                                                                         |        |
| 56 |                                                                         |        |
| 57 |                                                                         |        |
| 58 |                                                                         |        |
| 59 |                                                                         |        |
| 60 |                                                                         |        |

## Supplementary file 5: Risk of Bias of included studies

## Systematic reviews

| Author, Year                         | RISK OF BIAS | Dual Screening and Extraction | Comprehensive literature search | Study quality assessed | 'A priori' design | Grey literature included | List of studies | Study characteristics provided | Scientific quality used appropriately | Appropriate methods to combine findings | Publication bias     | Conflict of interest included | Reason for High Risk of Bias Decision                                                |
|--------------------------------------|--------------|-------------------------------|---------------------------------|------------------------|-------------------|--------------------------|-----------------|--------------------------------|---------------------------------------|-----------------------------------------|----------------------|-------------------------------|--------------------------------------------------------------------------------------|
| Di Marco et al., 2014 <sup>41</sup>  | High         | NR                            | Yes                             | No                     | Yes               | No                       | No              | No                             | NA                                    | Yes                                     | No                   | No                            | No information on screening methods or dual extraction<br>No risk of bias assessment |
| Opdebeeck et al., 2016 <sup>42</sup> | High         | Yes                           | Yes                             | No                     | Yes               | Yes                      | No              | Yes                            | NA                                    | Yes                                     | No                   | No                            | No risk of bias assessment<br>No assessment of Publication bias                      |
| Sajeev et al., 2016 <sup>43</sup>    | Medium       | NR                            | Yes                             | Yes                    | Yes               | No                       | No              | Yes                            | Yes                                   | Yes                                     | No                   | Yes                           | No information on dual screening or dual extraction                                  |
| Toril et al., 2014 <sup>44</sup>     | High         | NR                            | Yes                             | No                     | Yes               | No                       | No              | Yes                            | NA                                    | Yes                                     | Yes                  | No                            | No information on screening methods or dual extraction<br>No risk of bias assessment |
| Yates et al., 2016 <sup>45</sup>     | Medium       | NR                            | Yes                             | Yes                    | Yes               | No                       | No              | Yes                            | Yes                                   | Yes                                     | No (too few studies) | Yes                           | No information on dual screening or dual extraction                                  |

NA = not applicable, NR = not reported

## Supplementary file 6: List of excluded studies during full text screening

## Systematic review:

| Study                       | Title                                                                                                                                                                                                  | Reason for Exclusion        |
|-----------------------------|--------------------------------------------------------------------------------------------------------------------------------------------------------------------------------------------------------|-----------------------------|
| Canadian Nursing Home, 2007 | Studies confirm link between late-life cognitive activities and reduced risk of dementia                                                                                                               | Not retrievable             |
| Adam et al., 2013           | Occupational activity and cognitive reserve: implications in terms of prevention of cognitive aging and Alzheimer's disease                                                                            | Ineligible study design     |
| GM: Midlife & Beyond, 2017  | Study finds education does not protect against cognitive decline in later life                                                                                                                         | Ineligible study design     |
| Dowd et al., 2003           | Can mental and physical activities such as chess and gardening help in the prevention and treatment of Alzheimer's? Healthy aging through stimulation of the mind                                      | Ineligible study design     |
| Beydoun et al., 2014        | Epidemiologic studies of modifiable factors associated with cognition and dementia: systematic review and meta-analysis                                                                                | Ineligible study design     |
| Gilland, 2007               | Continuing education topic 4: dementia                                                                                                                                                                 | Ineligible study design     |
| Nursing Standard, 2010      | Clinical digest. Cognitive stimulation delays dementia but later decline is faster                                                                                                                     | Ineligible publication type |
| Albert et al., 2007         | Changing the trajectory of cognitive decline?                                                                                                                                                          | Ineligible publication type |
| Bak et al., 2016            | Language lessons to help protect against dementia                                                                                                                                                      | Ineligible publication type |
| Bauer et al., 2002          | RN news watch: clinical highlights. Mentally stimulating activities seem to cut Alzheimer's risk                                                                                                       | Ineligible publication type |
| Burgener et al., 2009       | Effectiveness of community-based, nonpharmacological interventions for early-stage dementia: conclusions and recommendations                                                                           | Ineligible publication type |
| Gatz et al., 2005           | Educating the brain to avoid dementia: can mental exercise prevent Alzheimer disease?                                                                                                                  | Ineligible publication type |
| Rosenberg et al., 2017      | Influence of apoe, age, sex, education and baseline cognition on intervention effects on cognition in the finnish geriatric intervention study to prevent cognitive impairment and disability (FINGER) | Ineligible publication type |
| Summers et al., 2013        | The Tasmanian Healthy Brain Project (THBP): a prospective longitudinal examination of the effect of university-level education in older adults in preventing age-related cognitive                     | Ineligible publication type |
| Wahlund et al., 2006        | [Life-long mental exercise can prevent Alzheimer disease]                                                                                                                                              | Ineligible publication type |
| ACTRN126120001 47886, 2012  | The Body, Brain, Life Program "a prevention trial to reduce risk of Alzheimer's Disease                                                                                                                | Ineligible intervention     |
| Anon et al., 2008           | The Study of Mental Activity and Regular Training for the Prevention of Cognitive Decline in at Risk Individuals: The SMART Trial Or The Study of Mental Activity and Regular                          | Ineligible intervention     |
| Brenes et al., 2003         | Cognitive training may improve targeted cognitive functions in older adults                                                                                                                            | Ineligible intervention     |
| Fratiglioni et al., 2007    | Prevention of Alzheimer's disease and dementia. Major findings from the Kungsholmen Project                                                                                                            | Ineligible intervention     |
| Gatz et al., 2006           | Lifestyle risk and delaying factors                                                                                                                                                                    | Ineligible intervention     |
| Hall et al., 2009           | Cognitive activities delay onset of memory decline in persons who develop dementia                                                                                                                     | Ineligible intervention     |
| Harmanci et al., 2003       | Risk factors for Alzheimer disease: a population-based case-control study in Istanbul, Turkey                                                                                                          | Ineligible intervention     |
| Harmanci et al., 2003       | Risk factors for Alzheimer disease: a population-based case-control study in Istanbul, Turkey                                                                                                          | Ineligible intervention     |
| Kwok et al., 2011           | Effectiveness of coordination exercise in improving cognitive function in older adults: a prospective study                                                                                            | Ineligible intervention     |
| Le Carret et al., 2003      | The effect of education on cognitive performances and its implication for the constitution of the cognitive reserve                                                                                    | Ineligible intervention     |
| Merom et al., 2016          | Cognitive benefits of social dancing and walking in old age: The dancing mind randomized controlled trial                                                                                              | Ineligible intervention     |
| Roberts et al., 2015        | Risk and protective factors for cognitive impairment in persons aged 85 years and older                                                                                                                | Ineligible intervention     |
| Sandro et al., 2008         | Risk-reducing effect of education in Alzheimer's disease                                                                                                                                               | Ineligible intervention     |
| Sattler et al., 2012        | Cognitive activity, education and socioeconomic status as preventive factors for mild cognitive impairment and Alzheimer's disease                                                                     | Ineligible intervention     |
| Schultz et al., 2015        | Participation in cognitively-stimulating activities is associated with brain structure and cognitive function in preclinical Alzheimer's disease                                                       | Ineligible intervention     |
| Soubelet et al., 2011       | Engaging in cultural activities compensates for educational differences in cognitive abilities                                                                                                         | Ineligible intervention     |



|    |                                                                   |                                                                                                                                                                                  |                                       |
|----|-------------------------------------------------------------------|----------------------------------------------------------------------------------------------------------------------------------------------------------------------------------|---------------------------------------|
| 1  |                                                                   |                                                                                                                                                                                  |                                       |
| 2  |                                                                   |                                                                                                                                                                                  |                                       |
| 3  |                                                                   |                                                                                                                                                                                  |                                       |
| 4  | Stanford University, 2012                                         | Activities for Cognitive Enhancement of Seniors                                                                                                                                  | Ineligible intervention               |
| 5  | Then et al., 2016                                                 | Education as protector against dementia, but what exactly do we mean by education?                                                                                               | Ineligible intervention               |
| 6  |                                                                   |                                                                                                                                                                                  |                                       |
| 7  | University Hospital 2016                                          | Long-term Effects of Interventional Strategies to Prevent Cognitive Decline in Elderly                                                                                           | Ineligible intervention               |
| 8  | VanDijk et al., 2008                                              | No protective effects of education during normal cognitive aging: results from the 6-year follow-up of the Maastricht Aging Study                                                | Ineligible intervention               |
| 9  |                                                                   |                                                                                                                                                                                  |                                       |
| 10 | Vemuri et al., 2014                                               | Association of lifetime intellectual enrichment with cognitive decline in the older population                                                                                   | Ineligible intervention               |
| 11 |                                                                   |                                                                                                                                                                                  |                                       |
| 12 | Wang et al., 2002                                                 | Late-life engagement in social and leisure activities is associated with a decreased risk of dementia: a longitudinal study from the Kungsholmen project                         | Ineligible intervention               |
| 13 |                                                                   |                                                                                                                                                                                  |                                       |
| 14 | Yaffe et al., 2009                                                | Predictors of maintaining cognitive function in older adults: the Health ABC study                                                                                               | Ineligible intervention               |
| 15 |                                                                   |                                                                                                                                                                                  |                                       |
| 16 | Kliegel et al., 2004                                              | Life-long intellectual activities mediate the predictive effect of early education on cognitive impairment in centenarians: A retrospective study                                | Ineligible populations                |
| 17 |                                                                   |                                                                                                                                                                                  |                                       |
| 18 | Jonaitis et al., 2013                                             | Cognitive activities and cognitive performance in middle-aged adults at risk for Alzheimer's disease                                                                             | Ineligible populations                |
| 19 | Friedland et al., 2001                                            | Patients with Alzheimer's disease have reduced activities in midlife compared with healthy control-group members                                                                 | No information about the intervention |
| 20 | National University,                                              | Choral Singing For the Prevention of Dementia                                                                                                                                    | not finished study                    |
| 21 |                                                                   |                                                                                                                                                                                  |                                       |
| 22 | Marquez et al., 2017                                              | Regular Latin Dancing and Health Education may Improve Cognition of Late Middle-Aged and Older Latinos                                                                           | Ineligible comparison;                |
| 23 | University Hospital 2018                                          | Prospective Population Based Cohort Study on Cognitive and Cardiovascular Aging (MonaLisaPredor)                                                                                 | not finished study;                   |
| 24 |                                                                   |                                                                                                                                                                                  |                                       |
| 25 | Janssen Research Development 2018                                 | Cognitive Health in Ageing Register: Investigational, Observational and Trial Studies in Dementia Research: Prospective Readiness Cohort Study                                   | not finished study                    |
| 26 | ACTRN126170008 58392 2017                                         | Ageing and Folk Dances from the Basque Country: Functional and neuropsychological changes. A controlled trial.                                                                   | Ineligible intervention               |
| 27 |                                                                   |                                                                                                                                                                                  |                                       |
| 28 | Biasutti et al., 2018                                             | Assessing a cognitive music training for older participants: a randomised controlled trial                                                                                       | Ineligible population                 |
| 29 |                                                                   |                                                                                                                                                                                  |                                       |
| 30 | Centre de Recherche del'Institut Universitaire de Geriatrie, 2018 | Impact of a Cognitive Intervention Enriched With Leisure Activities in Persons With Subjective Cognitive Decline                                                                 | Not finished study                    |
| 31 |                                                                   |                                                                                                                                                                                  |                                       |
| 32 | Chan et al., 2016                                                 | Training Older Adults to Use Tablet Computers: Does It Enhance Cognitive Function?                                                                                               | Ineligible study design               |
| 33 |                                                                   |                                                                                                                                                                                  |                                       |
| 34 | Ihle et al., 2017                                                 | The relation of education and cognitive activity to mini-mental state in old age: The role of functional fitness status                                                          | Ineligible intervention               |
| 35 |                                                                   |                                                                                                                                                                                  |                                       |
| 36 | Krell-Roesch et al., 2017                                         | Association Between Mentally Stimulating Activities in Late Life and the Outcome of Incident Mild Cognitive Impairment, With an Analysis of the APOE epsilon4 Genotype           | Ineligible intervention               |
| 37 | NCT02919748, 2016                                                 | Choral Singing For the Prevention of Dementia                                                                                                                                    | Not finished study                    |
| 38 |                                                                   |                                                                                                                                                                                  |                                       |
| 39 | Ramos et al., 2017                                                | Does learning a language in the elderly enhance switching ability?                                                                                                               | Ineligible outcome                    |
| 40 |                                                                   |                                                                                                                                                                                  |                                       |
| 41 | Wang et al., 2017                                                 | Association of lifelong exposure to cognitive reserve-enhancing factors with dementia risk: A community-based cohort study                                                       | Ineligible intervention               |
| 42 | ZanESCO et al., 2018                                              | Mental training of attention through intensive meditation: Longitudinal behavioral and electrophysiological investigations of visual sustained attention and response inhibition | Not retrievable                       |
| 43 | Zhu et al., 2017                                                  | Leisure activities, education, and cognitive impairment in Chinese older adults: A population-based longitudinal study                                                           | Ineligible intervention               |
| 44 | 2017                                                              | Study suggests late-life activities reduce the risk of mild cognitive impairment                                                                                                 | Ineligible study design               |
| 45 |                                                                   |                                                                                                                                                                                  |                                       |
| 46 |                                                                   |                                                                                                                                                                                  |                                       |
| 47 |                                                                   |                                                                                                                                                                                  |                                       |
| 48 |                                                                   |                                                                                                                                                                                  |                                       |
| 49 |                                                                   |                                                                                                                                                                                  |                                       |
| 50 |                                                                   |                                                                                                                                                                                  |                                       |
| 51 |                                                                   |                                                                                                                                                                                  |                                       |
| 52 |                                                                   |                                                                                                                                                                                  |                                       |
| 53 |                                                                   |                                                                                                                                                                                  |                                       |
| 54 |                                                                   |                                                                                                                                                                                  |                                       |
| 55 |                                                                   |                                                                                                                                                                                  |                                       |
| 56 |                                                                   |                                                                                                                                                                                  |                                       |
| 57 |                                                                   |                                                                                                                                                                                  |                                       |
| 58 |                                                                   |                                                                                                                                                                                  |                                       |
| 59 |                                                                   |                                                                                                                                                                                  |                                       |
| 60 |                                                                   |                                                                                                                                                                                  |                                       |

## Overview of Systematic Reviews

| Study                    | Title                                                                                                                                    | Reason for Exclusion                                          |
|--------------------------|------------------------------------------------------------------------------------------------------------------------------------------|---------------------------------------------------------------|
| Bernhardt et al., 2002   | [The effect of psychosocial factors on risk of dementia]                                                                                 | Ineligible intervention                                       |
| Bleakley et al., 2015    | Gaming for health: a systematic review of the physical and cognitive effects of interactive computer games in older adults               | Ineligible intervention                                       |
| Conti et al., 2009       | The potential role of leisure in the prevention of dementia                                                                              | Not retrievable                                               |
| Fratiglioni et al., 2004 | An active and socially integrated lifestyle in late life might protect against dementia                                                  | Ineligible study design                                       |
| Karkou et al., 2017      | Dance movement therapy for dementia                                                                                                      | Ineligible population                                         |
| Lee et al., 2019         | Systematic review of health behavioral risks and cognitive health in older adults                                                        | Ineligible intervention                                       |
| Liapis et al., 2017      | Meaningful use of computers has a potential therapeutic and preventative role in dementia care: A systematic review                      | Ineligible intervention                                       |
| Munn et al., 2010        | Review summaries: evidence for nursing practice. Cognitive leisure activities and their role in preventing dementia: a systematic review | Ineligible publication type                                   |
| Opdebeeck et al., 2014   | Cognitive reserve and cognitive function: A meta-analysis                                                                                | Ineligible publication type                                   |
| Stephen et al., 2017     | Physical Activity and Alzheimer's Disease: A Systematic Review                                                                           | Ineligible intervention                                       |
| Stern et al., 2010       | Cognitive leisure activities and their role in preventing dementia: a systematic review                                                  | Study superseded by more recent study                         |
| Stern et al., 2009       | Cognitive leisure activities and their role in preventing dementia: a systematic review                                                  | Ineligible publication type                                   |
| Wang et al., 2012        | Leisure activities, cognition and dementia                                                                                               | Study superseded by more recent study                         |
| Wayne et al., 2014       | Effect of tai chi on cognitive performance in older adults: systematic review and meta-analysis                                          | Ineligible intervention                                       |
| Zheng et al., 2015       | Tai Chi and the Protection of Cognitive Ability: A Systematic Review of Prospective Studies in Healthy Adults                            | Ineligible intervention                                       |
| Fallahpour et al., 2016  | Leisure-activity participation to prevent later-life cognitive decline: a systematic review                                              | Study superseded by more recent study (search only till 2011) |
| Bediou et al., 2018      | Meta-Analysis of Action Video Game Impact on Perceptual, Attentional, and Cognitive Skills                                               | Ineligible population                                         |
| Howes et al., 2017       | Gaming for Health: Systematic Review and Meta-analysis of the Physical and Cognitive Effects of Active Computer Gaming in Older Adults   | Ineligible intervention                                       |
| Klimova et al., 2017     | Cognitive decline in normal aging and its prevention: a review on non-pharmacological lifestyle strategies                               | Ineligible intervention                                       |
| Schneider et al., 2018   | Potential Cognitive Benefits From Playing Music Among Cognitively Intact Older Adults: A Scoping Review                                  | Ineligible study design                                       |
| Solloway et al., 2016    | An evidence map of the effect of Tai Chi on health outcomes                                                                              | Ineligible study design                                       |
| Wouters et al., 2013     | A meta-analysis of the cognitive and motivational effects of serious games                                                               | Ineligible study design                                       |
| Zhang et al., 2016       | Physical and Cognitive Impacts of Digital Games on Older Adults: A Meta-Analytic Review                                                  | Ineligible intervention                                       |

1  
2  
3  
4  
5  
6  
7  
8  
9  
10  
11  
12  
13  
14  
15  
16  
17  
18  
19  
20  
21  
22  
23  
24  
25  
26  
27  
28  
29  
30  
31  
32  
33  
34  
35  
36  
37  
38  
39  
40  
41  
42  
43  
44  
45  
46

**GRADE of Recommendations:**

**Cognitive leisure activities compared to no cognitive leisure activities for the prevention of dementia (OPDEBEEK et al.)**

**Patient or population:** over 60 years, non-demented adults at baseline

**Intervention:** cognitive leisure activities

**Comparison:** no cognitive leisure activities

| Outcomes                      | Anticipated absolute effects* (95% CI)          |                                                                                                                  | Relative effect (95% CI) | No of participants (studies) | Certainty of the evidence (GRADE) | Comments |
|-------------------------------|-------------------------------------------------|------------------------------------------------------------------------------------------------------------------|--------------------------|------------------------------|-----------------------------------|----------|
|                               | Risk with no cognitive leisure activities       | Risk with cognitive leisure activities                                                                           |                          |                              |                                   |          |
| Overall cognitive functioning | The mean overall cognitive functioning was 0 SD | The mean overall cognitive functioning in the intervention group was 0,26 SD higher (0,21 higher to 0,31 higher) | -                        | (31 observational studies)   | ⊕○○○<br>VERY LOW <sup>a,b</sup>   |          |

\*The risk in the intervention group (and its 95% confidence interval) is based on the assumed risk in the comparison group and the relative effect of the intervention (and its 95% CI).

CI: Confidence interval; MD: Mean difference

**GRADE Working Group grades of evidence**

**High certainty:** We are very confident that the true effect lies close to that of the estimate of the effect

**Moderate certainty:** We are moderately confident in the effect estimate: The true effect is likely to be close to the estimate of the effect, but there is a possibility that it is substantially different

**Low certainty:** Our confidence in the effect estimate is limited: The true effect may be substantially different from the estimate of the effect

**Very low certainty:** We have very little confidence in the effect estimate: The true effect is likely to be substantially different from the estimate of effect

**Explanations**

a. I<sup>2</sup> = 94%, b. Interventions vary between studies

## Video Games compared to no Video Games for the prevention of dementia (TORIL et al.)

**Patient or population:** 50-86 years, healthy older adults

**Intervention:** Video Games

**Comparison:** no Video Games

| Outcomes           | Anticipated absolute effects* (95% CI) |                       | Relative effect (95% CI) | No of participants (studies)      | Certainty of the evidence (GRADE) | Comments |
|--------------------|----------------------------------------|-----------------------|--------------------------|-----------------------------------|-----------------------------------|----------|
|                    | Risk with no Video Games               | Risk with Video Games |                          |                                   |                                   |          |
| Cognitive Function | -                                      | -                     | -                        | 913<br>(20 observational studies) | ⊕○○○<br>VERY LOW <sup>a</sup>     |          |

\*The risk in the intervention group (and its 95% confidence interval) is based on the assumed risk in the comparison group and the **relative effect** of the intervention (and its 95% CI).

CI: Confidence interval; SMD: Standardised mean difference

### GRADE Working Group grades of evidence

**High certainty:** We are very confident that the true effect lies close to that of the estimate of the effect

**Moderate certainty:** We are moderately confident in the effect estimate: The true effect is likely to be close to the estimate of the effect, but there is a possibility that it is substantially different

**Low certainty:** Our confidence in the effect estimate is limited: The true effect may be substantially different from the estimate of the effect

**Very low certainty:** We have very little confidence in the effect estimate: The true effect is likely to be substantially different from the estimate of effect

### Explanations

a. Mixing various different interventions and study designs

1  
2  
3  
4  
5  
6  
7  
8  
9  
10  
11  
12  
13  
14  
15  
16  
17  
18  
19  
20  
21  
22  
23  
24  
25  
26  
27  
28  
29  
30  
31  
32  
33  
34  
35  
36  
37  
38  
39  
40  
41  
42  
43  
44  
45  
46

**Cognitive leisure activities compared to no cognitive leisure activities for healthy older adults (YATES et al.)**

**Patient or population:** over 46 years, healthy older adults, **Intervention:** cognitive leisure activities, **Comparison:** no cognitive leisure activities

| Outcomes                          | Anticipated absolute effects* (95% CI)    |                                        | Relative effect (95% CI)            | No of participants (studies)                    | Certainty of the evidence (GRADE) | Comments |
|-----------------------------------|-------------------------------------------|----------------------------------------|-------------------------------------|-------------------------------------------------|-----------------------------------|----------|
|                                   | Risk with no cognitive leisure activities | Risk with cognitive leisure activities |                                     |                                                 |                                   |          |
| Incidence of AD                   | 0 per 1.000                               | <b>0 per 1.000</b><br>(0 to 0)         | <b>RR 0.610</b><br>(0.418 to 0.900) | (3 observational studies)                       | ⊕○○○<br>VERY LOW <sup>a,b</sup>   |          |
| Incidence of AD                   | 0 per 1.000                               | <b>NaN per 1.000</b><br>(NaN to NaN)   | <b>HR 0.584</b><br>(0.462 to 0.739) | (2 observational studies)                       | ⊕○○○<br>VERY LOW <sup>b</sup>     |          |
| Incidence of AD                   | <b>Low</b>                                |                                        | <b>OR 0.775</b><br>(0.668 to 0.899) | 0 cases 0 controls<br>(2 observational studies) | ⊕○○○<br>VERY LOW <sup>b,c</sup>   |          |
|                                   | 0 per 1.000                               | <b>0 per 1.000</b><br>(0 to 0)         |                                     |                                                 |                                   |          |
| Incidence of cognitive impairment | 0 per 1.000                               | <b>0 per 1.000</b><br>(0 to 0)         | <b>OR 0.685</b><br>(0.550 to 0.845) | (5 observational studies)                       | ⊕○○○<br>VERY LOW <sup>b</sup>     |          |
| Incidence of cognitive impairment | 0 per 1.000                               | <b>NaN per 1.000</b><br>(NaN to NaN)   | <b>HR 0.853</b><br>(0.711 to 1.022) | (3 observational studies)                       | ⊕○○○<br>VERY LOW <sup>b,c</sup>   |          |

\*The risk in the intervention group (and its 95% confidence interval) is based on the assumed risk in the comparison group and the relative effect of the intervention (and its 95% CI).  
CI: Confidence interval; RR: Risk ratio; HR: Hazard Ratio; OR: Odds ratio

**Explanations**

a. moderate heterogeneity, x<sup>2</sup> test p=0.09, b. differences in interventions (definition of cognitive leisure activities varies across studies), c. high heterogeneity, x<sup>2</sup> test p=0.00, confidence intervals do not overlap

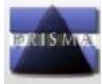

# PRISMA 2009 Checklist

| Section/topic                      | #  | Checklist item                                                                                                                                                                                                                                                                                              | Reported on page #         |
|------------------------------------|----|-------------------------------------------------------------------------------------------------------------------------------------------------------------------------------------------------------------------------------------------------------------------------------------------------------------|----------------------------|
| <b>TITLE</b>                       |    |                                                                                                                                                                                                                                                                                                             |                            |
| Title                              | 1  | Identify the report as a systematic review, meta-analysis, or both.                                                                                                                                                                                                                                         | Page 1 (line 1-3)          |
| <b>ABSTRACT</b>                    |    |                                                                                                                                                                                                                                                                                                             |                            |
| Structured summary                 | 2  | Provide a structured summary including, as applicable: background; objectives; data sources; study eligibility criteria, participants, and interventions; study appraisal and synthesis methods; results; limitations; conclusions and implications of key findings; systematic review registration number. | Page 3-4 (line 40-67)      |
| <b>INTRODUCTION</b>                |    |                                                                                                                                                                                                                                                                                                             |                            |
| Rationale                          | 3  | Describe the rationale for the review in the context of what is already known.                                                                                                                                                                                                                              | Page 5-7 (line 127-132)    |
| Objectives                         | 4  | Provide an explicit statement of questions being addressed with reference to participants, interventions, comparisons, outcomes, and study design (PICOS).                                                                                                                                                  | Page 7 (line 133-144)      |
| <b>METHODS</b>                     |    |                                                                                                                                                                                                                                                                                                             |                            |
| Protocol and registration          | 5  | Indicate if a review protocol exists, if and where it can be accessed (e.g., Web address), and, if available, provide registration information including registration number.                                                                                                                               | Page 7 (line 149-151)      |
| Eligibility criteria               | 6  | Specify study characteristics (e.g., PICOS, length of follow-up) and report characteristics (e.g., years considered, language, publication status) used as criteria for eligibility, giving rationale.                                                                                                      | Page 8-9 (line 171-196)    |
| Information sources                | 7  | Describe all information sources (e.g., databases with dates of coverage, contact with study authors to identify additional studies) in the search and date last searched.                                                                                                                                  | Page 9-10 (line 197-214)   |
| Search                             | 8  | Present full electronic search strategy for at least one database, including any limits used, such that it could be repeated.                                                                                                                                                                               | Supplementary file 3 and 4 |
| Study selection                    | 9  | State the process for selecting studies (i.e., screening, eligibility, included in systematic review, and, if applicable, included in the meta-analysis).                                                                                                                                                   | Page 10 (line 215-218)     |
| Data collection process            | 10 | Describe method of data extraction from reports (e.g., piloted forms, independently, in duplicate) and any processes for obtaining and confirming data from investigators.                                                                                                                                  | Page 10 (line 219-226)     |
| Data items                         | 11 | List and define all variables for which data were sought (e.g., PICOS, funding sources) and any assumptions and simplifications made.                                                                                                                                                                       | Page 10 (line 222-226)     |
| Risk of bias in individual studies | 12 | Describe methods used for assessing risk of bias of individual studies (including specification of whether this was done at the study or outcome level), and how this information is to be used in any data synthesis.                                                                                      | Page 10-11 (line 227-233)  |
| Summary measures                   | 13 | State the principal summary measures (e.g., risk ratio, difference in means).                                                                                                                                                                                                                               | Page 11 (line 234-240)     |



# PRISMA 2009 Checklist

|                      |    |                                                                                                                                                           |                        |
|----------------------|----|-----------------------------------------------------------------------------------------------------------------------------------------------------------|------------------------|
| Synthesis of results | 14 | Describe the methods of handling data and combining results of studies, if done, including measures of consistency (e.g., $I^2$ ) for each meta-analysis. | Page 11 (line 234-240) |
|----------------------|----|-----------------------------------------------------------------------------------------------------------------------------------------------------------|------------------------|

Page 1 of 2

| Section/topic               | #  | Checklist item                                                                                                                                   | Reported on page # |
|-----------------------------|----|--------------------------------------------------------------------------------------------------------------------------------------------------|--------------------|
| Risk of bias across studies | 15 | Specify any assessment of risk of bias that may affect the cumulative evidence (e.g., publication bias, selective reporting within studies).     | NA                 |
| Additional analyses         | 16 | Describe methods of additional analyses (e.g., sensitivity or subgroup analyses, meta-regression), if done, indicating which were pre-specified. | NA                 |

## RESULTS

|                               |    |                                                                                                                                                                                                          |                                                              |
|-------------------------------|----|----------------------------------------------------------------------------------------------------------------------------------------------------------------------------------------------------------|--------------------------------------------------------------|
| Study selection               | 17 | Give numbers of studies screened, assessed for eligibility, and included in the review, with reasons for exclusions at each stage, ideally with a flow diagram.                                          | Page 11 (line 238-243)<br>Figure 2 and figure 3              |
| Study characteristics         | 18 | For each study, present characteristics for which data were extracted (e.g., study size, PICOS, follow-up period) and provide the citations.                                                             | Page 11-12<br>(line 255-278)<br>Table 1 and table 2          |
| Risk of bias within studies   | 19 | Present data on risk of bias of each study and, if available, any outcome level assessment (see item 12).                                                                                                | Page 13-14<br>Table 1 and table 2                            |
| Results of individual studies | 20 | For all outcomes considered (benefits or harms), present, for each study: (a) simple summary data for each intervention group (b) effect estimates and confidence intervals, ideally with a forest plot. | Page 13-17<br>(line 288-351)<br>Table 1 and table 2          |
| Synthesis of results          | 21 | Present results of each meta-analysis done, including confidence intervals and measures of consistency.                                                                                                  | NA                                                           |
| Risk of bias across studies   | 22 | Present results of any assessment of risk of bias across studies (see Item 15).                                                                                                                          | Page 12 (line 264-266; line 273-278)<br>Supplementary file 5 |
| Additional analysis           | 23 | Give results of additional analyses, if done (e.g., sensitivity or subgroup analyses, meta-regression [see Item 16]).                                                                                    | NA                                                           |

## DISCUSSION

|                     |    |                                                                                                                                                                                      |         |
|---------------------|----|--------------------------------------------------------------------------------------------------------------------------------------------------------------------------------------|---------|
| Summary of evidence | 24 | Summarize the main findings including the strength of evidence for each main outcome; consider their relevance to key groups (e.g., healthcare providers, users, and policy makers). | Page 18 |
|---------------------|----|--------------------------------------------------------------------------------------------------------------------------------------------------------------------------------------|---------|



# PRISMA 2009 Checklist

|                |    |                                                                                                                                                               |                        |
|----------------|----|---------------------------------------------------------------------------------------------------------------------------------------------------------------|------------------------|
| Limitations    | 25 | Discuss limitations at study and outcome level (e.g., risk of bias), and at review-level (e.g., incomplete retrieval of identified research, reporting bias). | Page 19                |
| Conclusions    | 26 | Provide a general interpretation of the results in the context of other evidence, and implications for future research.                                       | Page 20                |
| <b>FUNDING</b> |    |                                                                                                                                                               |                        |
| Funding        | 27 | Describe sources of funding for the systematic review and other support (e.g., supply of data); role of funders for the systematic review.                    | Page 21 (line 423-425) |

From: Moher D, Liberati A, Tetzlaff J, Altman DG, The PRISMA Group (2009). Preferred Reporting Items for Systematic Reviews and Meta-Analyses: The PRISMA Statement. PLoS Med 6(6): e1000097. doi:10.1371/journal.pmed1000097

For more information, visit: [www.prisma-statement.org](http://www.prisma-statement.org).

Page 2 of 2



# BMJ Open

## Continuing Education for the Prevention of Mild Cognitive Impairment and Alzheimer's-Type Dementia: A Systematic Review and Overview of Systematic Reviews.

|                                 |                                                                                                                                                                                                                                                                                                                                                                                                                                                                                                                                                                                                                                                                                                                                                                                                                                                                                                                                                                                                                                                                                  |
|---------------------------------|----------------------------------------------------------------------------------------------------------------------------------------------------------------------------------------------------------------------------------------------------------------------------------------------------------------------------------------------------------------------------------------------------------------------------------------------------------------------------------------------------------------------------------------------------------------------------------------------------------------------------------------------------------------------------------------------------------------------------------------------------------------------------------------------------------------------------------------------------------------------------------------------------------------------------------------------------------------------------------------------------------------------------------------------------------------------------------|
| Journal:                        | <i>BMJ Open</i>                                                                                                                                                                                                                                                                                                                                                                                                                                                                                                                                                                                                                                                                                                                                                                                                                                                                                                                                                                                                                                                                  |
| Manuscript ID                   | bmjopen-2018-027719.R2                                                                                                                                                                                                                                                                                                                                                                                                                                                                                                                                                                                                                                                                                                                                                                                                                                                                                                                                                                                                                                                           |
| Article Type:                   | Research                                                                                                                                                                                                                                                                                                                                                                                                                                                                                                                                                                                                                                                                                                                                                                                                                                                                                                                                                                                                                                                                         |
| Date Submitted by the Author:   | 24-May-2019                                                                                                                                                                                                                                                                                                                                                                                                                                                                                                                                                                                                                                                                                                                                                                                                                                                                                                                                                                                                                                                                      |
| Complete List of Authors:       | Matyas, Nina; Donau-Universitat Krems, Department for Evidence-based Medicine and Clinical Epidemiology<br>Keser Aschenberger, Filiz; Donau-Universitat Krems, Department for Continuing Education Research and Educational Management<br>Wagner, Gernot; Donau-Universitat Krems, Department for Evidence-based Medicine and Clinical Epidemiology<br>Teufer, Birgit; Donau-Universitat Krems, Department for Evidence-based Medicine and Clinical Epidemiology<br>Auer, Stefanie; Donau-Universitat Krems, Department of Clinical Neurosciences and Preventive Medicine<br>Gisinger, Christoph; Donau-Universitat Krems, Center for Geriatric Medicine and Geriatric Nursing<br>Kil, Monika; Donau-Universitat Krems, Department for Continuing Education Research and Educational Management<br>Klerings, Irma; Donau-Universitat Krems, Department for Evidence-based Medicine and Clinical Epidemiology<br>Gartlehner, Gerald; Donau-Universitat Krems, Department for Evidence-based Medicine and Clinical Epidemiology; RTI International, Evidence-based Practice Center |
| <b>Primary Subject Heading</b>: | Mental health                                                                                                                                                                                                                                                                                                                                                                                                                                                                                                                                                                                                                                                                                                                                                                                                                                                                                                                                                                                                                                                                    |
| Secondary Subject Heading:      | Neurology, Geriatric medicine, Public health, Mental health                                                                                                                                                                                                                                                                                                                                                                                                                                                                                                                                                                                                                                                                                                                                                                                                                                                                                                                                                                                                                      |
| Keywords:                       | Systematic review, Dementia < NEUROLOGY, mild cognitive impairment, PREVENTIVE MEDICINE, continuing education                                                                                                                                                                                                                                                                                                                                                                                                                                                                                                                                                                                                                                                                                                                                                                                                                                                                                                                                                                    |
|                                 |                                                                                                                                                                                                                                                                                                                                                                                                                                                                                                                                                                                                                                                                                                                                                                                                                                                                                                                                                                                                                                                                                  |

SCHOLARONE™  
Manuscripts

1  
2 1 **Continuing Education for the Prevention of Mild Cognitive Impairment and**  
3  
4  
5 2 **Alzheimer's-Type Dementia: A Systematic Review and Overview of Systematic**  
6  
7  
8 3 **Reviews.**

9  
10 4 **Nina Matyas**<sup>1</sup>, MD, MSc, Research Associate, Department for Evidence-based Medicine and Clinical  
11  
12  
13 5 Epidemiology, Cochrane Austria, Danube University Krems; nina.matyas@ext.donau-uni.ac.at

14  
15 6 **Filiz Keser Aschenberger**<sup>2</sup>, MA, PhD, Research Associate, Department for Continuing Education  
16  
17  
18 7 Research and Educational Management, Danube University Krems; filiz.keser-aschenberger@donau-  
19  
20 8 uni.ac.at

21  
22 9 **Gernot Wagner**<sup>1</sup>, MD, Research Associate, Department for Evidence-based Medicine and Clinical  
23  
24 10 Epidemiology, Cochrane Austria, Danube University Krems; gernot.wagner@donau-uni.ac.at

25  
26 11 **Birgit Teufer**<sup>1</sup>, MA, Research Associate, Department for Evidence-based Medicine and Clinical  
27  
28 12 Epidemiology, Cochrane Austria, Danube University Krems; birgit.teufer@donau-uni.ac.at

29  
30 13 **Stefanie Auer**<sup>3</sup>, Professor, Department of Clinical Neurosciences and Preventive Medicine, Danube  
31  
32 14 University Krems; Stefanie.auer@donau-uni.ac.at

33  
34 15 **Christoph Gisinger**<sup>4</sup>, Professor, Center for Geriatric Medicine and Geriatric Nursing, Danube  
35  
36 16 University Krems; christoph.gisinger@donau-uni.ac.at

37  
38 17 **Monika Kil**<sup>2</sup>, Professor, Department for Continuing Education Research and Educational  
39  
40 18 Management, Danube University Krems; monika.kil@donau-uni.ac.at

41  
42 19 **Irma Klerings**<sup>1</sup>, Department for Evidence-based Medicine and Clinical Epidemiology, Cochrane  
43  
44 20 Austria, Danube University Krems; irma.klerings@donau-uni.ac.at

45  
46 21 **Gerald Gartlehner**<sup>1,5</sup>, MD, MPH, Professor, RTI-University of North Carolina Evidence based Practice  
47  
48 22 Center, RTI International; gerald.gartlehner@donau-uni.ac.at

49  
50  
51 23  
52  
53  
54  
55 24 <sup>1</sup> Department for Evidence-based Medicine and Clinical Epidemiology, Cochrane Austria, Danube  
56  
57 25 University Krems, Dr. Karl Dorrek Straße 30, 3500 Krems, Austria

1  
2 26 <sup>2</sup> Department for Continuing Education Research and Educational Management, Danube University  
3

4 27 Krems, Dr. Karl Dorrek Straße 30, 3500 Krems, Austria  
5

6 28 <sup>3</sup> Department of Clinical Neurosciences and Preventive Medicine, Danube University Krems, Dr. Karl  
7

8 29 Dorrek Straße 30, 3500 Krems, Austria  
9

10 30 <sup>4</sup> Center for Geriatric Medicine and Geriatric Nursing, Danube University Krems, Dr. Karl Dorrek  
11

12 31 Straße 30, 3500 Krems, Austria  
13

14 32 <sup>5</sup> RTI International, 3040 Cornwallis Road, PO Box 12194, Research Triangle Park, North Carolina,  
15

16 33 27709-2194, USA  
17

18 34 **Corresponding Author:** Nina Matyas, MD, MSc (nina.matyas@ext.donau-uni.ac.at)  
19

20 35 **Key words:** systematic review, dementia, mild cognitive impairment, prevention, continuing  
21

22 36 education  
23

24 37 **Word count: 3860**  
25

26 38  
27  
28  
29  
30  
31  
32  
33  
34  
35  
36  
37  
38  
39  
40  
41  
42  
43  
44  
45  
46  
47  
48  
49  
50  
51  
52  
53  
54  
55  
56  
57  
58  
59  
60

## 39 **ABSTRACT**

40 **Objective:** To summarize evidence on the preventive effects of continuing education on mild  
41 cognitive impairment and Alzheimer's-type dementia in adults 45 years or older.

42 **Design:** Systematic review and overview of systematic reviews.

43 **Data sources:** We systematically searched MEDLINE, PsycINFO, EMBASE, CENTRAL, CINAHL and  
44 Scopus for published studies and gray literature databases for unpublished studies from January  
45 1990 to April 2018.

46 **Methods:** To assess evidence directly addressing our objectives, we conducted a systematic review.  
47 Because we were aware of a dearth of direct evidence, we also performed an overview of systematic  
48 reviews on leisure activities that mimic formal continuing education. We a priori established inclusion  
49 and exclusion criteria. Two authors independently assessed inclusion and exclusion on abstract and  
50 full-text level, rated risk of bias, and determined the certainty of evidence using GRADE. We resolved  
51 all discrepancies by consensus. We synthesized the available evidence narratively.

52 **Results:** Our searches identified 4933 citations. For the systematic review, only two publications on  
53 the same prospective cohort study (Tasmanian Healthy Brain Project) met inclusion criteria; for the  
54 overview of reviews we included five systematic reviews. Based on 459 participants, preliminary data  
55 of the ongoing cohort study indicated that cognitive reserve statistically significantly increased in  
56 persons attending university classes compared to the control group (92.5% vs. 55.7%,  $p<0.01$ ).  
57 Likewise, language processing capacities statistically significantly improved ( $p<0.01$ ). Episodic  
58 memory, working memory, and executive function did not differ significantly between groups.  
59 Systematic reviews consistently reported a positive association between participation in cognitively  
60 stimulating leisure activities and reduced incidence of dementia and improved cognitive test  
61 performance.

62 **Conclusion:** Available results demonstrate that cognitive reserve increases through continuing  
63 education and show a positive association of cognitive leisure activities with both improved cognitive  
64 function and lower dementia incidence.

1  
2 65 **Systematic review registration:** PROSPERO CRD42017063944  
3  
4 66  
5  
6 67  
7  
8  
9 68 **Strengths and Limitations of this study:**

- 10  
11 69 • This is the first systematic review assessing the benefits and harms of continuing education  
12 on the prevention of mild cognitive impairment or Alzheimer's type dementia.  
13 70  
14  
15 71 • This is the first overview of systematic reviews presenting an up-to-date summary of  
16 currently available research in the field of cognitive leisure activities and dementia.  
17 72  
18  
19 73 • The certainty of evidence is low, indicating that future studies might have a substantial  
20 impact on results of our review.  
21 74  
22  
23 75 • Measurements and types of cognitive leisure activities differed widely across studies and  
24 quantitative analysis were often not possible.  
25 76  
26  
27 77 • The majority of included systematic reviews have serious methodological shortcomings.  
28  
29  
30  
31 78  
32  
33  
34 79  
35  
36  
37  
38  
39  
40  
41  
42  
43  
44  
45  
46  
47  
48  
49  
50  
51  
52  
53  
54  
55  
56  
57  
58  
59  
60

## 80 INTRODUCTION

81 In 2012, the World Health Organization (WHO) named the prevention and control of  
82 neurocognitive disorders such as mild cognitive impairment or Alzheimer's-type dementia a global  
83 public health priority.<sup>1</sup> Alzheimer's-type dementia is the most common form of dementia.<sup>1</sup> In 2018,  
84 50 million people worldwide lived with Alzheimer's disease or another closely related form of  
85 dementia.<sup>2</sup> As a consequence of the rapidly aging world population, the prevalence of dementia is  
86 projected to rise up to 152 million people in 2050.<sup>2</sup>

87 The progressive loss of independent functioning of people with Alzheimer's-type dementia,  
88 leads to an enormous social and economic burden. In 2018, the U.S. economic burden associated  
89 with Alzheimer's type dementia was estimated to be 277 billion U.S. Dollars.<sup>3</sup> The total global costs  
90 for dementia were about a trillion US dollar in 2018.<sup>2</sup>

91 The Diagnostic and Statistical Manual (DSM-5) characterizes Alzheimer's disease as a  
92 significant decline of intellectual abilities in one or more cognitive domains (learning and memory,  
93 language, executive function, complex attention, perceptual motor function, social cognition) outside  
94 the context of delirium.<sup>4</sup>

95 Any dementia diagnosis, however, is frequently preceded by a long period of subclinical  
96 neuropathological disorder with subjective cognitive disorder and mild cognitive disorder as a  
97 transition phase before diagnostic criteria for dementia are fulfilled.<sup>5</sup> If cognitive decline progresses  
98 to a degree that a person's capability of carrying out everyday activities is significantly affected, this  
99 state is called major neurocognitive disorder.<sup>4,5</sup>

100 The risk of developing neurocognitive disorders increases substantially with age. The  
101 prevalence of Alzheimer's type dementia is 3.5% in persons aged 75 or older and 46.3% in those 95  
102 years or older.<sup>6</sup> It is estimated that 15 to 20 percent of people age 65 or older are living with mild  
103 cognitive impairment.<sup>3</sup> Other risk factors than age contributing to the development of dementia are  
104 not yet thoroughly understood. In recent years, epidemiological studies have linked the development  
105 of dementia with risk factors such as low educational level, unhealthy diet, decreased physical

1  
2 106 activity, and smoking.<sup>7,8</sup> In addition, potential predictors of dementia are chronic medical conditions  
3  
4 107 such as cardiovascular diseases, diabetes, obesity, cancers, depression, thyroid disorder, or genetic  
5  
6 108 factors.<sup>9</sup> Some studies, however, found a protective association of cognitively stimulating activities,  
7  
8 109 such as learning a new language in middle age, with a slower cognitive decline during late life.<sup>10-14</sup>  
9  
10 110 Such results underpin the “cognitive reserve hypothesis”.<sup>15-17</sup> According to this theory, through every  
11  
12 111 activity that stimulates the brain, the cognitive reserve gets boosted and the resistance towards any  
13  
14 112 dementia-related brain pathology increases.<sup>18</sup> In animal trials, an enriched environment was  
15  
16 113 associated with increased cortical thickness.<sup>19</sup> Epidemiological research on humans has shown that  
17  
18 114 education<sup>20</sup> and probably also other forms of intellectual stimulation, during the whole lifespan, are  
19  
20 115 associated with a lower risk to develop dementia.<sup>21, 22</sup> A larger cognitive reserve acquired by  
21  
22 116 continuing education activities, thus, might protect against cognitive decline.<sup>18, 23</sup>  
23  
24  
25

26 117 Continuing education activities are structured learning activities offered by educational  
27  
28 118 institutes. These activities are designed to help individuals satisfy learning needs and interests after  
29  
30 119 compulsory schooling, to enrich knowledge, to develop and improve abilities and skills, and to foster  
31  
32 120 personality, social competences, families, networks, health, and professional life. Continuing  
33  
34 121 education is voluntary, based on topics and courses that are not directly connected to any special job  
35  
36 122 position or vocational training.<sup>24-29</sup> Cognitive leisure activities (e.g., learning a new language) often  
37  
38 123 mimic continuing education activities but are not taking place within the framework of an  
39  
40 124 educational institution.  
41  
42  
43

## 44 125 **Rationale**

45  
46  
47 126 To date, the preventive effect of continuing education on cognitive impairment and Alzheimer’s-type  
48  
49 127 dementia has not been assessed in an objective and systematic way. The aim of our review was to  
50  
51 128 summarize the evidence investigating the preventive effects of continuing education on the  
52  
53 129 development of cognitive impairment and Alzheimer’s-type dementia.  
54  
55

56  
57 130 Our systematic review addressed the following questions:  
58  
59  
60

- 1  
2 131 **Key question 1a:** In adults 45 years of age or older with normal cognition or merely subjective  
3  
4 132 cognitive impairment, does continuing education lead to a reduction in the risk of mild cognitive  
5  
6 133 impairment or Alzheimer's-type dementia compared with no continuing education?  
7  
8  
9 134 **Key question 1b:** (In case no evidence on continuing education is available or the evidence is sparse):  
10  
11 135 In adults 45 years of age or older with normal cognition or merely subjective cognitive impairment,  
12  
13 136 do cognitive leisure activities lead to a reduction in the risk of mild cognitive impairment or  
14  
15 137 Alzheimer's-type dementia compared with no cognitive leisure activities?  
16  
17  
18 138 **Key question 2:** What are potential harms of continuing education?  
19  
20  
21 139 **Key question 3:** Do benefits and harms differ by subgroups based on age, sex/gender, race or  
22  
23 140 ethnicities, level of education, or duration of intervention?  
24  
25  
26 141 **Key question 4:** What is the optimal age to start continuing education to prevent mild cognitive  
27  
28 142 impairment or dementia?  
29  
30

31  
32  
33

## 34 144 **METHODS**

### 36 145 **Design**

38 146 Throughout this manuscript we followed the PRISMA (Preferred Reporting Items for  
39  
40 147 Systematic Reviews and Meta-Analyses) statement<sup>30</sup> (see supplementary file 1). The protocol of this  
41  
42 148 systematic review was registered in PROSPERO (International Prospective Register of Systematic  
43  
44 149 Reviews) (Registration number CRD42017063944) and published previously.<sup>31</sup> Figure 1 depicts the  
45  
46 150 analytic framework that guided our systematic review.

49 151 [Figure 1 about here]

52 152 For this systematic review, we define continuing education as structured learning activities  
53  
54 153 and programs provided by formal and non-formal educational institutions for persons beyond the  
55  
56 154 age of compulsory schooling (in most countries 16 years and older).<sup>24-29</sup>

59 155 We addressed our research questions with two different methodological approaches:  
60



1  
2 156 1) We performed a systematic review of primary studies to assess the preventive  
3  
4 157 effects and potential harms of continuing education provided by formal and non-formal  
5  
6 158 institutions (key questions 1a, 2, 3, and 4).  
7

8 159 2) We conducted an overview of systematic reviews to determine the preventive effects  
9  
10 160 and potential harms of related leisure activities (e.g. playing cards, reading books, etc., key  
11  
12 161 question 1b).  
13  
14

15 162 We chose this two-step approach because studies in the field of continuing education and  
16  
17 163 dementia are very rare. Certain leisure activities, however, are able to mimic continuing education  
18  
19 164 regarding content (e.g. learning a new language privately versus learning a new language as an  
20  
21 165 organized educational activity). Leisure activities are not our primary focus of interest but can be  
22  
23 166 considered as proxy interventions for continuing education in some circumstances.  
24  
25  
26  
27  
28

## 29 168 **Study selection**

### 30 31 169 **Eligibility criteria for the systematic review**

32  
33 170 The population of interest were adults 45 years or older, without a clinical diagnosis of  
34  
35 171 cognitive impairment at the time of study recruitment, which included people with subjective  
36  
37 172 cognitive impairment. Eligible interventions comprised of all cognitive activities that are provided by  
38  
39 173 formal and non-formal educational institutions. These activities include classes, courses, and  
40  
41 174 trainings that are based on individual interests and that are attended voluntarily. We included  
42  
43 175 randomized controlled trials, nonrandomized controlled trials, prospective controlled cohort studies,  
44  
45 176 retrospective controlled cohort studies, and case-control studies. All nonrandomized studies needed  
46  
47 177 to have a minimum sample size of 300 or more participants.  
48  
49

50  
51 178 Eligible studies had a minimum follow up time of 1 year and a minimum duration of  
52  
53 179 intervention of 3 months. We excluded studies that investigated formal (vocational) education (e.g.  
54  
55 180 School or College), physical activities, and all job-related courses and trainings.  
56  
57  
58  
59  
60

1  
2 181 Outcomes of interest included patient-relevant health outcomes such as incidence of  
3  
4 182 dementia, incidence of MCI, psychological wellbeing, functional capacity, quality of life, and other  
5  
6 183 relevant health outcomes; in addition, we included intermediate outcomes such as cognitive  
7  
8 184 functioning, cognitive (test) performance, or social inclusion. For the purpose of our study, mild  
9  
10 185 cognitive impairment refers to “amnesic” mild cognitive impairment (aMCI), meaning that memory  
11  
12 186 loss is the predominant symptom.<sup>32</sup>

### 16 187 **Eligibility criteria for the overview of systematic reviews**

18 188 Eligibility criteria for population and outcomes for the overview of systematic reviews were  
19  
20 189 the same as for the systematic review. Eligible interventions were leisure activities that are  
21  
22 190 cognitively stimulating and mimic the content of continuing education but in an informal setting. Just  
23  
24 191 as in the systematic review, we excluded physical activities. Eligible study designs were exclusively  
25  
26 192 systematic reviews and meta-analyses. We excluded reviews with searches conducted before 2013.

27  
28 193 Further details about our inclusion and exclusion criteria can be found in our protocol<sup>31</sup> and  
29  
30 194 in the supplementary file 2.

### 35 195 **Search strategy**

36  
37 196 We systematically searched Ovid MEDLINE, Cochrane Library, Embase, PsycINFO, CINAHL  
38  
39 197 (Cumulative Index to Nursing and Allied Health Literature), ALOIS (the Cochrane Dementia and  
40  
41 198 Cognitive Improvement Group Specialized Register), and ERIC (Education Resources Information  
42  
43 199 Center) from January 1990 to April 2018 to identify relevant publications (see supplementary file 3  
44  
45 200 for the search strategy). For the overview of reviews, we searched Epistemonikos from inception to  
46  
47 201 April 2018 in addition to the above mentioned databases (see supplementary file 4).

48  
49 202 An experienced information specialist developed an appropriate search strategy using a  
50  
51 203 combination of medical subject headings (MeSH®) and title and abstract keywords, limiting the  
52  
53 204 search to human-only studies without applying any language limitations. The electronic Ovid Medline  
54  
55 205 search strategy was peer-reviewed by another information specialist following the PRESS (peer  
56  
57  
58  
59  
60

1  
2 206 review of the electronic search strategy) statement.<sup>33</sup> For the systematic review, we searched for  
3  
4 207 gray literature in ClinicalTrials.gov, the World Health Organization's International Clinical Trials  
5  
6 208 Registry Platform, web pages of relevant organizations, and a dissertation database ("Digital Access  
7  
8 209 to Research Theses", DART-Europe). Additionally, in an attempt to avoid retrieval bias, we manually  
9  
10 210 searched the reference lists of landmark studies and background articles on this topic to look for any  
11  
12 211 relevant citations that our electronic searches might have missed. We imported all citations into an  
13  
14 212 electronic database (EndNote X.8) and deleted duplicates.  
15  
16  
17

### 18 213 **Study selection**

19  
20 214 Two review authors independently screened abstracts and relevant full text articles for  
21  
22 215 eligibility, using Covidence Software.<sup>34</sup> They resolved disagreements by discussion or by consultation  
23  
24 216 with a third author.  
25  
26  
27

### 28 217 **Data abstraction**

29  
30 218 We designed, pilot-tested, and used a data abstraction form to gather pertinent information  
31  
32 219 from each article. One author extracted relevant data from each study that met our inclusion criteria.  
33  
34 220 A second author of the team cross-checked data abstractions for completeness and accuracy. We  
35  
36 221 extracted study information (author, publication year, years covered by searches, location/setting,  
37  
38 222 number of included studies and included study designs), sample size, study characteristics  
39  
40 223 (population, interventions, and comparators), outcome measurements, and results. For systematic  
41  
42 224 reviews we abstracted summary estimates of meta-analyses whenever available.  
43  
44  
45  
46

### 47 225 **Risk of bias assessment**

48  
49 226 Two investigators independently assessed the risk of bias of included studies. They resolved  
50  
51 227 any disagreements by consensus or by consulting a third team member. For eligible non-randomized  
52  
53 228 studies we used the ROBINS-I (Risk Of Bias In Non-randomized Studies - of Interventions) tool.<sup>35</sup> For  
54  
55 229 the assessment of eligible systematic reviews, we used the AMSTAR (Assessing the Methodological  
56  
57  
58  
59  
60

230 Quality of Systematic Reviews) tool.<sup>36</sup> Detailed risk of bias ratings of included articles are given in  
231 supplementary file 5.

### 232 **Data synthesis and statistical analysis**

233 We narratively summarized evidence from included studies. If available, we present effect  
234 estimates of systematic reviews. For the incidence of dementia we present hazard ratios (HR), odds  
235 ratios (OR), and risk ratios (RR). For the assessment of cognitive test performance we use  
236 standardized mean differences because scales for measurements differed in the individual studies. A  
237 standardized mean difference of 0 indicates that both groups had the same cognitive test  
238 performance.

### 239 **Certainty of evidence**

240 We followed the recommendations of the GRADE (Grading of Recommendations  
241 Assessment, Development and Evaluation) working group for rating the certainty of evidence for  
242 each outcome.<sup>37</sup>

### 243 **Patient involvement**

244 No patients were involved in the development of this research paper.

245

## 246 **RESULTS**

247 Our search identified in total 4933 citations after exclusion of duplicates. Based on title and  
248 abstract review, we considered 58 primary studies and 28 systematic reviews for full-text review.  
249 After scrutinising the full-text articles, we included two publications of one primary study<sup>38 39</sup> and five  
250 systematic reviews.<sup>40-44</sup> Figure 2 and figure 3 depict the study selection process. Supplementary file 6  
251 provides a list of excluded studies at full-text level.

252 [Figure 2 and figure 3 about here]

### 253 **Study characteristics**

### 254 **Systematic Review**

1  
2 255 We included two publications<sup>38 39</sup> that present interim findings of the same medium risk of  
3  
4 256 bias prospective cohort study, namely the Tasmanian Healthy Brain Project that plans to follow  
5  
6 257 participants for 10-20 years.<sup>45</sup> The two publications analysed different aspects of cognitive  
7  
8 258 functioning of the same 459 participants who did or did not engage in a 12 month, part-time or full-  
9  
10 259 time university-level education. Participants' mean age was 59.6±7 (mean±SD) years in the  
11  
12 260 intervention group and 62.4±6 years in the control group with a follow-up period of 4 years.  
13  
14 261 Participants completed a neuropsychological test battery, consisting of 14 tests each year.<sup>45</sup>  
15

16  
17 262 In this study, selection bias is likely because participants voluntarily opted for university  
18  
19 263 courses or no further education. It is not clear if investigators used appropriate methods to adjust for  
20  
21 264 potential confounders (see supplementary file 5 for risk of bias ratings).  
22  
23  
24

## 25 265 **Overview of Reviews**

26  
27 266 All five included systematic reviews investigated the benefits of cognitive leisure activities in  
28  
29 267 adults over the age of 45 years.<sup>40-44</sup> Four studies included any cognitive leisure activities in their  
30  
31 268 analyses (e.g. reading books, doing crosswords, attending cultural events, knitting, painting), one  
32  
33 269 study<sup>43</sup> specifically focused on the benefits of playing video games in older adults. The number of  
34  
35 270 participants investigated in the reviews ranged from 913<sup>43</sup> to 24,554.<sup>41</sup>  
36  
37

38 271 We rated three of the included systematic reviews<sup>40 42 43</sup> as high and two studies<sup>41 44</sup> as  
39  
40 272 medium risk of bias. Reasons for the high risk of bias ratings were lack of critical appraisal of included  
41  
42 273 studies, single review of the literature, and insufficient literature searches (see supplementary file 5).  
43  
44

45 274 We graded the evidence for all meta-analysis outcomes with low certainty of evidence  
46  
47 275 mostly because of high inconsistency and indirectness among studies (see supplementary file 7).  
48  
49

50 276 We present characteristics of included studies<sup>40-44</sup> in table 1 and table 2.  
51  
52  
53  
54  
55  
56  
57  
58  
59  
60

1  
2  
3  
4  
5  
6  
7  
8  
9  
10  
11  
12  
13  
14  
15  
16  
17  
18  
19  
20  
21  
22  
23  
24  
25  
26  
27  
28  
29  
30  
31  
32  
33  
34  
35  
36  
37  
38  
39  
40  
41  
42  
43  
44  
45  
46

| Reference                         | Study design                                                          | Aim                                                                                                                                                             | Sample Size                                            | Population                        | Intervention                                                                          | Measurements                                                                                                                   | Outcomes                                                                                                                                                         | Risk of bias |
|-----------------------------------|-----------------------------------------------------------------------|-----------------------------------------------------------------------------------------------------------------------------------------------------------------|--------------------------------------------------------|-----------------------------------|---------------------------------------------------------------------------------------|--------------------------------------------------------------------------------------------------------------------------------|------------------------------------------------------------------------------------------------------------------------------------------------------------------|--------------|
| Lenhan et al., 2016 <sup>39</sup> | Prospective cohort study, Tasmanian Healthy Brain Project (2011-2016) | To investigate changes in cognitive reserve in healthy older adults participating over four years in university-level education.                                | 459 (359 in the Intervention group, 100 control group) | 50-79 years, healthy older adults | Minimum of 12 months of part-time or full-time university study<br>Follow-up: 4 years | Prior Cognitive reserve and current cognitive reserve were calculated for each participant.                                    | 55,7% in the control group vs. 92,5% in the university education group showed a significant increase of cognitive reserve                                        | Medium       |
| Thow et al., 2018 <sup>38</sup>   |                                                                       | To determine if the observed increase in cognitive reserve among older adults attending university is associated with a change in cognitive function over time. |                                                        |                                   |                                                                                       | Episodic memory, working memory, executive function, and language processing performances were assessed annually over 4 years. | Statistically significant improvement of language processing capacity.<br><br>No significant improvement of episodic memory, working memory, executive function. | Medium       |

Table 1: Study Characteristics of included primary studies

| Reference                            | Aim                                                                                                                                                                                          | Search Strategy                                                                                                                                        | N of included studies                 | Study design                                                 | Total number of participants   | Population                                     | Outcomes                                                                                                                                                                                                                           | Risk of bias |
|--------------------------------------|----------------------------------------------------------------------------------------------------------------------------------------------------------------------------------------------|--------------------------------------------------------------------------------------------------------------------------------------------------------|---------------------------------------|--------------------------------------------------------------|--------------------------------|------------------------------------------------|------------------------------------------------------------------------------------------------------------------------------------------------------------------------------------------------------------------------------------|--------------|
| Di Marco et al., 2014 <sup>40</sup>  | To provide a comprehensive summary of modifiable lifestyle factors (dietary habits, leisure activities, social network et cetera.) associated with the risk of late-onset incident dementia. | NR to 2013<br>PubMed, Ovid MEDLINE, PsycINFO, In-Process and other non-indexed citations<br><br>Search terms provided<br>English language publications | 6 (cognitive leisure activities)      | Longitudinal observational cohort-studies                    | NR                             | ≥65 years, adults without dementia at baseline | No quantitative analysis<br><br>Cognitive leisure activities might be associated with <b>reduced incidence of all-cause dementia</b>                                                                                               | High         |
| Opdebeeck et al., 2016 <sup>41</sup> | To assess the relationship between cognitive reserve (educational level, occupational status and engagement in cognitively stimulating activities) and cognition in multiple domains.        | NR to 2014<br>PubMed, PsycInfo, ScienceDirect, CINHAL<br><br>Search terms provided                                                                     | 31 (cognitive stimulating activities) | 31 Cross-sectional studies                                   | 24561                          | ≥60 years (at least 80% of study participants) | SMD 0.26 (95% CI 0.21-0.32)<br><br>Participating in cognitive leisure activities is associated with <b>improved cognitive functions</b> (including memory, working memory, executive function, visuospatial ability, and language) | High         |
| Sajeev et al., 2016 <sup>42</sup>    | To assess if engaging in late-life cognitive activities is able to delay or prevent dementia.                                                                                                | NR to June 2014<br>PubMed and EMBASE                                                                                                                   | 12 (cognitive stimulating activities) | 10 prospective cohort studies; 2 nested case-control studies | 13939 (dementia: 1663 AD: 565) | ≥45 years                                      | No quantitative analysis                                                                                                                                                                                                           | Medium       |

|                                  |                                                                                                                              |                                                                                                                 |                                   |                                                 |                                         |                                                                                      |                                                                                                                                                                                                                                                                                                   |        |
|----------------------------------|------------------------------------------------------------------------------------------------------------------------------|-----------------------------------------------------------------------------------------------------------------|-----------------------------------|-------------------------------------------------|-----------------------------------------|--------------------------------------------------------------------------------------|---------------------------------------------------------------------------------------------------------------------------------------------------------------------------------------------------------------------------------------------------------------------------------------------------|--------|
|                                  |                                                                                                                              | No search terms provided                                                                                        |                                   |                                                 |                                         |                                                                                      | Late-life cognitive activity might be associated with <b>lower AD and/or all-cause dementia incidence</b>                                                                                                                                                                                         |        |
| Toril et al., 2014 <sup>43</sup> | To investigate the extent to which cognitive training with video games enhances cognitive functions in healthy older adults. | 1986-2013<br>MEDLINE, PsycInfo and Google Scholar<br><br>Search terms provided<br>English language publications | 20 (video game training)          | 18 controlled studies<br>2 uncontrolled studies | 913 (474 trained, 439 healthy controls) | 50 - 86 years, healthy older adults                                                  | SMD 0.37 (95% CI 0.26 – 0.48)<br><br>Video game training is associated with <b>improved cognitive functions</b> in older adults (including memory, attention, reaction time, cognitive function, executive functions)                                                                             | High   |
| Yates et al., 2016 <sup>44</sup> | To assess the impact of cognitively stimulating leisure activities on cognition and risk of dementia in later life.          | 2004 – 2014<br>PsychInfo, MEDLINE, CINAHL, EMBASE and the Web of Science<br><br>Search terms provided           | 19 (cognitive leisure activities) | 17 Cohort studies<br>2 Case control studies     | 32546                                   | ≥ 46 years, cognitively healthy adults (i.e. no diagnosis of impairment or dementia) | <b>All-cause dementia incidence:</b><br>RR 0.61 (95%CI 0.42 – 0.90), k=3, RE<br>HR 0.58 (95%CI 0.46 – 0.74), k=2, RE<br>OR 0.78 (95%CI 0.67 – 0.90), k=2, FE<br><br><b>Cognitive impairment incidence:</b><br>OR 0.69 (95%CI 0.56 – 0.85), k=5, RE<br>HR 0.85 (95% CI 0.71 – 1.02), k=3, RE, n.s. | Medium |

NR = Not reported, AD = Alzheimer's-type dementia, k = studies that assessed cognitive activities only, n= number of participants, RE = random-effects model, FE = fixed effects model, n.s. = not significant

**Table 2: Study Characteristics of included systematic reviews**

## 286 **Outcomes**

### 287 **Key question 1a: Continuing education**

288 Two interim analyses of the Tasmanian Healthy Brain Project focused on language  
289 processing<sup>38</sup> and cognitive reserve<sup>39</sup> after 4 years of follow-up. To date, no results on the incidence of  
290 mild cognitive impairment or Alzheimer's-type dementia are available yet. Both studies reported  
291 beneficial effects of continuing education. Thow and colleagues<sup>38</sup> showed that attending university  
292 courses over a period of 12 months statistically significantly ( $p<0.05$ ) improved the language  
293 processing capacity in the intervention group compared to the control group. No statistically  
294 significant differences were detected for episodic memory, working memory, and executive function  
295 between groups. In all analyses, authors accounted for age and prior cognitive reserve (education,  
296 pre-existing intellectual capacity, life-experience).

297 Lenehan and coworkers<sup>39</sup> demonstrated by conducting growth mixture modeling that the  
298 cognitive reserve statistically significantly increased in 92.5% of participants in the intervention group  
299 (n=359) compared to 55.7% of participants in the control group (n=100). Investigators created a  
300 proxy measure of "current cognitive reserve" to capture dynamic changes in cognitive reserve over  
301 time, including intellectual capacity and academic ability.<sup>46</sup>

### 302 **Key question 1b: Cognitive leisure activities**

303 Overall, the five included systematic reviews reported consistently that participation in  
304 cognitive stimulating leisure activities can reduce the risk of developing mild cognitive impairment or  
305 Alzheimer's-type dementia and improves cognitive functioning of healthy older adults.

306 Two systematic reviews<sup>40,42</sup> investigated the impact of cognitive leisure activities on the  
307 incidence of Alzheimer's-type dementia. Di Marco and colleagues included six, Sajeev and colleagues  
308 12 primary studies on cognitive leisure activities in their systematic reviews. Both systematic reviews  
309 concluded that leisure activities protect against dementia. Due to different categorization of  
310 cognitive leisure activities and a high heterogeneity between studies, quantitative analyses were not  
311 possible in the two reviews. The effect estimates of included studies ranged from hazard ratios [HR]



1  
2 312 of 0.39 (95% CI: 0.21 - 0.71)<sup>47</sup> to HR of 0.93 (95% CI: 0.88 – 0.98)<sup>48</sup> showing statistically significantly  
3  
4 313 reduced risks of Alzheimer's-type dementia when carrying out leisure activities. Sajeev et al.<sup>42</sup>  
5  
6 314 performed an extensive bias analysis indicating that it is unlikely that the observed positive effects of  
7  
8 315 cognitively stimulating activities on dementia incidence are exclusively explained by unmeasured  
9  
10 316 confounders or reverse causation.

11  
12  
13 317 One review<sup>44</sup> assessed both incidence of mild cognitive impairment and Alzheimer's-type  
14  
15 318 dementia and cognitive test performance. The authors conducted five meta-analyses based on  
16  
17 319 groups for outcomes and reported effect estimates (risk ratio [RR], odds ratio [OR], and hazard ratio  
18  
19 320 [HR]). Four out of five meta-analyses revealed statistically significant results showing that cognitive  
20  
21 321 leisure activities were associated with a reduction of dementia incidence (RR = 0.61, 95% CI: 0.42-  
22  
23 322 0.90; HR = 0.58, 95% CI: 0.46-0.74, OR = 0.78, 95% CI: 0.67 – 0.90) and a reduction of cognitive  
24  
25 323 impairment incidence (OR = 0.69, 95% CI: 0.56 – 0.85). However, one meta-analysis, combining three  
26  
27 324 cohort studies did not reach statistical significance (HR = 0.85, 95% CI: 0.71-1.02) for reduction of  
28  
29 325 cognitive impairment. A narrative analysis of primary studies assessing cognitive test performance  
30  
31 326 showed a statistically significant improvement of memory, speed of processing, language, and  
32  
33 327 executive functioning and overall later life cognition.

34  
35  
36 328 Two other included studies<sup>41 43</sup>, both rated as high risk of bias, focused on cognitive test  
37  
38 329 performance. Opdebeeck et al.<sup>41</sup> reported a benefit in overall cognitive abilities for the group  
39  
40 330 involving in cognitive leisure activities (standardized mean difference [SMD] of 0.26 (95% confidence  
41  
42 331 interval [CI]: 0.21-0.32). The cognitive domains included memory, working memory, executive  
43  
44 332 function, visuospatial ability, and language. According to the review by Toril et al. <sup>43</sup>, playing video  
45  
46 333 games enhanced several cognitive functions. They observed a SMD of 0.37 (95% CI 0.26 – 0.48) for  
47  
48 334 global cognitive function (combining results for memory, attention, reaction time and executive  
49  
50 335 functions), showing a benefit for the intervention group.

## 51 336 **Key question 2: Harms**

52  
53  
54  
55  
56  
57  
58  
59 337 We found no evidence regarding harms of continuing education or cognitive leisure activities.  
60

1  
2 338 **Key question 3: Subgroups**  
3

4 339 Toril and colleagues<sup>43</sup> performed several subgroup analyses. The study revealed that the age  
5  
6  
7 340 of the participants and the number of video game training sessions significantly changed the effect  
8  
9 341 size. Older participants (between 71 and 80 years) seemed to benefit more from computer training  
10  
11 342 than younger participants (60 to 70 years). For the improvement of cognitive test performance,  
12  
13 343 shorter training sessions (1-6 weeks) seemed to show an advantage over longer training  
14  
15 344 interventions (7-12 weeks). By contrast, for incidence of Alzheimer's-type dementia, DiMarco et al.<sup>40</sup>  
16  
17 345 and Sajeev et al.<sup>42</sup> infer from their data that greater participation in cognitive leisure activities over a  
18  
19 346 longer period of time contributes positively to the protective effect.  
20  
21  
22

23 347 **Key question 4: Optimal age**  
24

25 348 No study specifically discussed the optimal age to start with continuing education activities or  
26  
27 349 cognitive leisure activities to prevent mild cognitive impairment or dementia.  
28  
29  
30  
31  
32  
33  
34  
35  
36  
37  
38  
39  
40  
41  
42  
43  
44  
45  
46  
47  
48  
49  
50  
51  
52  
53  
54  
55  
56  
57  
58  
59  
60

## DISCUSSION

The evidence assessing the impact of continuing education on the risk of MCI or Alzheimer-type dementia is limited. The only eligible primary study (Tasmanian Healthy Brain project)<sup>45</sup> is still ongoing but preliminary findings after four years of follow-up demonstrated that the dynamic nature of cognitive reserve permits improvements through education even at an advanced age. Nevertheless, these early findings have to be viewed cautiously. In addition, selection bias could potentially distort results of the Tasmanian Healthy Brain project because participants voluntarily opted for university courses or no further education. The available publications did not explain sufficiently how baseline differences such as comorbid diseases were taken into consideration during the analyses.

Because of the limited direct evidence, we focused on cognitive leisure activities as proxies for formal continuing education. Overall, the available evidence consistently indicates beneficial effects of cognitive leisure activities by improving the cognitive function of older adults and reducing the incidence of MCI and Alzheimer's-type dementia. These findings could be explained by the neuroplasticity of the human brain, which refers to the ability of the brain to adapt to every new stimulus by forming dendritic connections, creating morphological changes and increasing cognitive reserve.<sup>49-51</sup> Neuroplasticity is an intrinsic property of the human brain that allows us to learn and adapt to environmental changes. Depending on the stimuli, the changes can be positive or negative.<sup>49-51</sup> The concept of neuroplasticity is interrelated with the concept of cognitive reserve which refers to morphological changes that support cognitive functioning.<sup>51</sup>

The magnitudes of beneficial effects, however, varied across systematic reviews and confidence intervals encompassed effect sizes that would not be clinically relevant. Consequently, we rated the certainty of evidence as low or very low which means that future studies are likely to have a substantial impact on these findings.

To the best of our knowledge, our study was the first assessing the impact of continuing education on MCI and Alzheimer's-type dementia. It is also the first overview of systematic reviews presenting an up-to-date summary of currently available research in the field of cognitive leisure

1  
2 377 activities and dementia. Nevertheless, our work has several limitations. First, in the overview of  
3  
4 378 systematic reviews we had to rely on the quality of included systematic reviews which often had  
5  
6 379 methodological shortcomings (e.g. no risk of bias assessment, no dual screening etc.). Second, most  
7  
8 380 of the included studies were observational studies, which are prone to selection bias because  
9  
10 381 participants self-select the group. Risk factors for MCI or dementia in participants selecting leisure  
11  
12 382 activities or further education might be systematically different from participants in the control  
13  
14 383 groups. For example, people who eventually suffer from preclinical dementia stages might be more  
15  
16 384 likely to avoid cognitive leisure activities, which would lead to reverse causation. Third, many primary  
17  
18 385 studies within the reviews used self-reported questionnaires that could be challenging for people  
19  
20 386 who start having cognitive deficits. Finally, the variation of leisure activity categorization across  
21  
22 387 studies made meta-analysis difficult and sometimes impossible. For example, “visiting a library” was  
23  
24 388 classified as a cognitive activity by one author but as a physical activity by another. Some studies  
25  
26 389 assessed current participation in activities, others participation at younger ages. Additionally, some  
27  
28 390 studies assessed the frequency of participation, others the time devoted to activities and some the  
29  
30 391 total number of leisure activities. Consequently, due to these limitations, the comparability of results  
31  
32 392 among studies was limited. A standardization of measures and methods would be necessary to help  
33  
34 393 synthesize evidence in the future and make more reliable recommendations.

#### 394 **Implication for future research, policy and practice**

395       Based on preliminary results of a long-term cohort study and indirect evidence from studies  
396 on leisure activities, continuing education might be a promising option to help prevent dementia. A  
397 recent study suggests that modifiable risk factors (low education, midlife hypertension, midlife  
398 obesity, diabetes, physical inactivity, smoking, and depression) might be responsible for about a third  
399 of Alzheimer’s-type dementia cases.<sup>52</sup> Hence, considering our results, a campaign promoting to  
400 “actively use the brain by participating in the wide range of continuing education” could possibly be  
401 added to the list of preventive options and could have an impact on the reduction of Alzheimer’s-  
402 type dementia cases. The Finnish Geriatric Intervention Study to Prevent Cognitive Impairment and

1  
2 403 Disability (FINGER)<sup>53</sup>, a randomized controlled trial, with a multi-domain approach (diet, exercise,  
3  
4 404 cognitive training, vascular risk monitoring) supports the hypothesis that simultaneous changes in  
5  
6 405 several risk factors can lead to a protective effect on cognition.  
7

8  
9 406 Further research is needed to address the evidence gap regarding continuing education and  
10  
11 407 the extent to which it acts as a protective factor. A study similar to the Tasmanian Healthy Brain  
12  
13 408 Project<sup>39</sup>, but conducted as a randomized controlled trial, would be ideal because it would  
14  
15 409 adequately handle known and unknown confounders. Computers and Internet could play a more  
16  
17 410 significant role in future prevention trials. Older adults could, for instance, be randomized to attend  
18  
19 411 online courses and communicate with professors and other students in virtual classrooms. This  
20  
21 412 approach could save time, money, and increase the potential participant pool.  
22  
23

#### 24 413 **Conclusion**

25  
26 414 Although no firm conclusions about the effects of continuing education to prevent MCI and  
27  
28 415 dementia can be drawn, data from preliminary and indirect evidence indicate that continuing  
29  
30 416 education could potentially have important preventive effects.  
31  
32

33 417  
34  
35  
36  
37  
38  
39  
40  
41  
42  
43  
44  
45  
46  
47  
48  
49  
50  
51  
52  
53  
54  
55  
56  
57  
58  
59  
60

1  
2 418 **Acknowledgments:** We would like to thank Manuela Müllner from Danube University Krems for  
3  
4 419 administrative support.

5  
6 420 **Funding Statement:** This work was supported by internal funds of the Danube-University Krems,  
7  
8 421 Austria. It did not receive financial support from any funding agency in the public, commercial, or  
9  
10 422 not-for profit sectors.

11  
12  
13 423 **Availability of data and materials:** All extracted data are included in the manuscript. There are no  
14  
15 424 additional datasets available.

16  
17 425 **Competing interests:** All authors declare that they have no competing interest.

18  
19  
20 426 **Author Contributions:** All authors made substantial contribution to the conception and design of this  
21  
22 427 study. GG, NM, MK, CG and SA developed the concept of the study. As an information specialist, IK  
23  
24 428 developed the search strategy. GW, FKA, NM and BT conducted the literature review, abstracted  
25  
26 429 data and graded the strength of evidence. NM wrote the first draft of the manuscript; all authors  
27  
28 430 reviewed the manuscript and provided comments. All authors have given approval for this version to  
29  
30 431 be published.

31  
32  
33 432

34  
35 433 **Figure Legends:**

36  
37  
38 434 **Figure 1:** Analytic framework for continuing education to prevent mild cognitive impairment and  
39  
40 435 Alzheimer's-type dementia

41  
42 436 **Figure 2:** Flow diagram of systematic review of continuing education for the prevention of mild  
43  
44 437 cognitive impairment and Alzheimer's-type dementia

45  
46 438 **Figure 3:** Flow diagram of overview of systematic reviews of cognitive leisure activities for the  
47  
48 439 prevention of mild cognitive impairment and Alzheimer's-type dementia

1  
2 440 **List of abbreviations**  
3  
4

- 5 441 AD = Alzheimer Disease  
6 442 aMCI = Amnesic Mild Cognitive Impairment  
7 443 AMSTAR = Assessing the Methodological Quality of Systematic Reviews  
8 444 CEDEFOP = European Centre for the Development of Vocational Training  
9 445 CENTRAL = Cochrane Central Register of Controlled Trials  
10 446 DSM = Diagnostic and Statistical Manual of Mental Disorders  
11 447 GRADE = Grading of Recommendations Assessment, Development and Evaluation  
12 448 HR = Hazard Ratio  
13 449 ICD = International Classification of Diseases  
14 450 MCI = Mild Cognitive Impairment  
15 451 MMSE = Mini-Mental State Examination  
16 452 OECD = Organisation for Economic Co-operation and Development  
17 453 OR = Odds Ratio  
18 454 PRISMA= Preferred Reporting Items for Systematic Reviews and Meta-Analyses  
19 455 ROBINS-I = Risk of Bias in non-randomized studies – of interventions  
20 456 RR = Relative Risk  
21 457 SD = Standard Deviation  
22 458 SMD = Standardized mean difference  
23 459 UNESCO = United Nations Educational, Scientific and Cultural Organization  
24 460 WHO = World Health Organisation  
25  
26  
27  
28  
29  
30  
31  
32  
33  
34  
35  
36  
37  
38  
39  
40  
41  
42  
43  
44  
45  
46  
47  
48  
49  
50  
51  
52  
53  
54  
55  
56  
57  
58  
59  
60

## References

1. World Health Organisation (WHO). Dementia: A Public Health Priority Geneva, Switzerland 2012 [Available from: [http://apps.who.int/iris/bitstream/10665/75263/1/9789241564458\\_eng.pdf?ua=1](http://apps.who.int/iris/bitstream/10665/75263/1/9789241564458_eng.pdf?ua=1) accessed 20 Apr 2017.
2. Patterson C, Lynch C, Bliss A, et al. World Alzheimer Report 2018 - The state of the art of dementia research: New frontiers 2018 [Available from: <https://www.alz.co.uk/research/WorldAlzheimerReport2018.pdf> accessed 15 Feb 2019.
3. Alzheimer's Association. Alzheimer's Disease Facts and Figures 2018 [Available from: <https://www.alz.org/media/HomeOffice/Facts and Figures/facts-and-figures.pdf> accessed 15 Feb 2019.
4. Association AP. Diagnostic and Statistical Manual of Mental Disorders, Fifth Edition (DSM-5): Arlington, VA: American Psychiatric Publishing 2013.
5. Committee on Decreasing the Risk of Alzheimer's-Type Dementia. Mild Cognitive Impairment Age-Related Cognitive IBoHS, Policy Institute of, Medicine National Academies of Sciences, Engineering Medicine. The National Academies Collection: Reports funded by National Institutes of Health. *Considerations for the Design of a Systemic Review of Interventions for Preventing Clinical Alzheimer's-Type Dementia, Mild Cognitive Impairment, and Age-Related Cognitive Decline: Letter Report* 2015. <https://www.nap.edu/catalog/21885/considerations-for-the-design-of-a-systemic-review-of-interventions-for-preventing-clinical-alzheimers-type-dementia-mild-cognitive-impairment-and-age-related-cognitive-decline>.
6. Reynish E, Fratiglioni L, Prince M, et al. EUROCODE Prevalence of dementia in Europe 2006 [Available from: [https://ec.europa.eu/health/archive/ph\\_information/dissemination/diseases/docs/eurocode.pdf](https://ec.europa.eu/health/archive/ph_information/dissemination/diseases/docs/eurocode.pdf) accessed 6 Mar 2017.
7. Alonso A, Jacobs DR, Jr., Menotti A, et al. Cardiovascular risk factors and dementia mortality: 40 years of follow-up in the Seven Countries Study. *Journal of the neurological sciences* 2009;280(1-2):79-83. doi: 10.1016/j.jns.2009.02.004 [published Online First: 2009/03/03]
8. Scarmeas N, Luchsinger JA, Schupf N, et al. Physical activity, diet, and risk of Alzheimer disease. *Jama* 2009;302(6):627-37. doi: 10.1001/jama.2009.1144 [published Online First: 2009/08/13]
9. Institute of Medicine (IOM). Cognitive aging: progress in understanding and opportunities for action. Washington, DC: The National Academies Press 2015:109-47.
10. Wilson RS, Boyle PA, Yu L, et al. Life-span cognitive activity, neuropathologic burden, and cognitive aging. *Neurology* 2013;81(4):314-21. doi: 10.1212/WNL.0b013e31829c5e8a [published Online First: 2013/07/05]
11. Bosma H, van Boxtel MP, Ponds RW, et al. Engaged lifestyle and cognitive function in middle and old-aged, non-demented persons: a reciprocal association? *Zeitschrift fur Gerontologie und Geriatrie* 2002;35(6):575-81. doi: 10.1007/s00391-002-0080-y [published Online First: 2002/12/20]
12. Hultsch DF, Hertzog C, Small BJ, et al. Use it or lose it: engaged lifestyle as a buffer of cognitive decline in aging? *Psychology and aging* 1999;14(2):245-63. [published Online First: 1999/07/14]
13. Wilson RS, Mendes De Leon CF, Barnes LL, et al. Participation in cognitively stimulating activities and risk of incident Alzheimer disease. *Jama* 2002;287(6):742-8. [published Online First: 2002/02/20]
14. Wilson RS, Scherr PA, Schneider JA, et al. Relation of cognitive activity to risk of developing Alzheimer disease. *Neurology* 2007;69(20):1911-20. doi: 10.1212/01.wnl.0000271087.67782.cb [published Online First: 2007/06/29]
15. Tucker AM, Stern Y. Cognitive reserve in aging. *Current Alzheimer research* 2011;8(4):354-60. [published Online First: 2011/01/13]



- 1  
2 515 16. Stern Y. Cognitive reserve in ageing and Alzheimer's disease. *The Lancet Neurology*  
3 516 2012;11(11):1006-12. doi: 10.1016/s1474-4422(12)70191-6 [published Online First:  
4 517 2012/10/20]
- 5 518 17. Valenzuela MJ, Sachdev P. Brain reserve and dementia: a systematic review. *Psychological*  
6 519 *medicine* 2006;36(4):441-54. doi: 10.1017/s0033291705006264 [published Online First:  
7 520 2005/10/07]
- 8 521 18. Scarmeas N, Stern Y. Cognitive reserve: implications for diagnosis and prevention of Alzheimer's  
9 522 disease. *Current neurology and neuroscience reports* 2004;4(5):374-80. [published Online  
10 523 First: 2004/08/25]
- 11 524 19. Diamond MC, Rosenzweig MR, Bennett EL, et al. Effects of environmental enrichment and  
12 525 impoverishment on rat cerebral cortex. *Journal of neurobiology* 1972;3(1):47-64. doi:  
13 526 10.1002/neu.480030105 [published Online First: 1972/01/01]
- 14 527 20. Ngandu T, von Strauss E, Helkala EL, et al. Education and dementia: what lies behind the  
15 528 association? *Neurology* 2007;69(14):1442-50. doi: 10.1212/01.wnl.0000277456.29440.16  
16 529 [published Online First: 2007/10/03]
- 17 530 21. Marx J. Neuroscience. Preventing Alzheimer's: a lifelong commitment? *Science (New York, NY)*  
18 531 2005;309(5736):864-6. doi: 10.1126/science.309.5736.864 [published Online First:  
19 532 2005/08/06]
- 20 533 22. Fratiglioni L, Paillard-Borg S, Winblad B. An active and socially integrated lifestyle in late life might  
21 534 protect against dementia. *The Lancet Neurology* 2004;3(6):343-53. doi: 10.1016/s1474-  
22 535 4422(04)00767-7 [published Online First: 2004/05/26]
- 23 536 23. Katzman R, Terry R, DeTeresa R, et al. Clinical, pathological, and neurochemical changes in  
24 537 dementia: a subgroup with preserved mental status and numerous neocortical plaques.  
25 538 *Annals of neurology* 1988;23(2):138-44. doi: 10.1002/ana.410230206 [published Online First:  
26 539 1988/02/01]
- 27 540 24. UNESCO. International Standard Classification of Education (ISCED) 2011 2012 [Available from:  
28 541 <http://uis.unesco.org/en/glossary-term/adult-education> accessed Accessed 11 May 2017.
- 29 542 25. UNESCO. Continuing Education and New Directions Bangkok1993 [Available from:  
30 543 [http://www.unesco.org/education/pdf/413\\_48a.pdf](http://www.unesco.org/education/pdf/413_48a.pdf) accessed Accessed 11 May 2017.
- 31 544 26. Manninen J, Sgier I, Fleige M. Benefits of Lifelong Learning in Europe: Main Results of the BELL-  
32 545 Project, Research Report 2014 [Available from: [http://www.bell-project.eu/cms/wp-](http://www.bell-project.eu/cms/wp-content/uploads/2014/06/bell-research-report.pdf)  
33 546 [content/uploads/2014/06/bell-research-report.pdf](http://www.bell-project.eu/cms/wp-content/uploads/2014/06/bell-research-report.pdf) accessed 16 May 2017.
- 34 547 27. OECD. Learning opportunities for adults. Participation in adult education. Paris,1977:11.
- 35 548 28. Cedefop. Terminology of European education and training policy A selection of 100 key  
36 549 terms2008.
- 37 550 29. Kil M, Motschilnig R, Thöne-Geyer B. What Can Adult Education Accomplish? The Benefits of  
38 551 Adult Learning – The Approach, Measurement and Prospects 2013 [Available from:  
39 552 <https://www.die-bonn.de/doks/2013-benefits-en-01.pdf> accessed 16 May 2017.
- 40 553 30. Moher D, Liberati A, Tetzlaff J, et al. Reprint--preferred reporting items for systematic reviews  
41 554 and meta-analyses: the PRISMA statement. *Physical therapy* 2009;89(9):873-80. [published  
42 555 Online First: 2009/09/03]
- 43 556 31. Matyas N, Auer S, Gisinger C, et al. Continuing education for the prevention of mild cognitive  
44 557 impairment and Alzheimer's-type dementia: a systematic review protocol. *Systematic*  
45 558 *reviews* 2017;6(1):157. doi: 10.1186/s13643-017-0553-0 [published Online First: 2017/08/10]
- 46 559 32. Petersen R. C. Mild cognitive impairment as a diagnostic entity. *Journal of internal medicine*  
47 560 2004;256(3):183-94. doi: 10.1111/j.1365-2796.2004.01388.x [published Online First:  
48 561 2004/08/25]
- 49 562 33. McGowan J, Sampson M, Salzwedel DM, et al. PRESS Peer Review of Electronic Search Strategies:  
50 563 2015 Guideline Statement. *Journal of Clinical Epidemiology*;75:40-46. doi:  
51 564 10.1016/j.jclinepi.2016.01.021
- 52 565 34. Veritas Health Innovation M, Australia. Covidence systematic review software [Available from:  
53 566 [www.covidence.org](http://www.covidence.org).

- 1  
2 567 35. Sterne JA, Hernan MA, Reeves BC, et al. ROBINS-I: a tool for assessing risk of bias in non-  
3 568 randomised studies of interventions. *BMJ (Clinical research ed)* 2016;355:i4919. doi:  
4 569 10.1136/bmj.i4919 [published Online First: 2016/10/14]  
5 570 36. Shea BJ, Hamel C, Wells GA, et al. AMSTAR is a reliable and valid measurement tool to assess the  
6 571 methodological quality of systematic reviews. *J Clin Epidemiol* 2009;62(10):1013-20. doi:  
7 572 10.1016/j.jclinepi.2008.10.009 [published Online First: 2009/02/24]  
8 573 37. Balshem H, Helfand M, Schunemann HJ, et al. GRADE guidelines: 3. Rating the quality of evidence.  
9 574 *J Clin Epidemiol* 2011;64(4):401-6. doi: 10.1016/j.jclinepi.2010.07.015 [published Online First:  
10 575 2011/01/07]  
11 576 38. Thow ME, Summers MJ, Saunders NL, et al. Further education improves cognitive reserve and  
12 577 triggers improvement in selective cognitive functions in older adults: The Tasmanian Healthy  
13 578 Brain Project. *Alzheimer's & dementia (Amsterdam, Netherlands)* 2018;10:22-30. doi:  
14 579 10.1016/j.dadm.2017.08.004 [published Online First: 2017/10/17]  
15 580 39. Lenehan ME, Summers MJ, Saunders NL, et al. Sending your grandparents to university increases  
16 581 cognitive reserve: The Tasmanian Healthy Brain Project. *Neuropsychology* 2016;30(5):525-31.  
17 582 doi: 10.1037/neu0000249 [published Online First: 2015/11/17]  
18 583 40. Di Marco LY, Marzo A, Munoz-Ruiz M, et al. Modifiable lifestyle factors in dementia: a systematic  
19 584 review of longitudinal observational cohort studies. *Journal of Alzheimer's disease : JAD*  
20 585 2014;42(1):119-35. doi: 10.3233/jad-132225 [published Online First: 2014/05/07]  
21 586 41. Opdebeeck C, Martyr A, Clare L. Cognitive reserve and cognitive function in healthy older people:  
22 587 a meta-analysis. *Neuropsychology, development, and cognition Section B, Aging,*  
23 588 *neuropsychology and cognition* 2016;23(1):40-60. doi: 10.1080/13825585.2015.1041450  
24 589 [published Online First: 2015/05/02]  
25 590 42. Sajeev G, Weuve J, Jackson JW, et al. Late-life Cognitive Activity and Dementia: A Systematic  
26 591 Review and Bias Analysis. *Epidemiology (Cambridge, Mass)* 2016;27(5):732-42. doi:  
27 592 10.1097/ede.0000000000000513 [published Online First: 2016/05/27]  
28 593 43. Toril P, Reales JM, Ballesteros S. Video game training enhances cognition of older adults: a meta-  
29 594 analytic study. *Psychology and aging* 2014;29(3):706-16. doi: 10.1037/a0037507 [published  
30 595 Online First: 2014/09/23]  
31 596 44. Yates LA, Ziser S, Spector A, et al. Cognitive leisure activities and future risk of cognitive  
32 597 impairment and dementia: systematic review and meta-analysis. *International*  
33 598 *psychogeriatrics* 2016;28(11):1791-806. doi: 10.1017/s1041610216001137 [published Online  
34 599 First: 2016/08/10]  
35 600 45. Summers MJ, Saunders NL, Valenzuela MJ, et al. The Tasmanian Healthy Brain Project (THBP): a  
36 601 prospective longitudinal examination of the effect of university-level education in older  
37 602 adults in preventing age-related cognitive decline and reducing the risk of dementia.  
38 603 *International psychogeriatrics* 2013;25(7):1145-55. doi: 10.1017/s1041610213000380  
39 604 [published Online First: 2013/03/26]  
40 605 46. Ward DD, Summers MJ, Saunders NL, et al. Modeling cognitive reserve in healthy middle-aged  
41 606 and older adults: the Tasmanian Healthy Brain Project. *International psychogeriatrics*  
42 607 2015;27(4):579-89. doi: 10.1017/s1041610214002075 [published Online First: 2014/09/24]  
43 608 47. Akbaraly TN, Portet F, Fustini S, et al. Leisure activities and the risk of dementia in the elderly:  
44 609 results from the Three-City Study. *Neurology* 2009;73(11):854-61. doi:  
45 610 10.1212/WNL.0b013e3181b7849b [published Online First: 2009/09/16]  
46 611 48. Verghese J, Lipton RB, Katz MJ, et al. Leisure activities and the risk of dementia in the elderly. *The*  
47 612 *New England journal of medicine* 2003;348(25):2508-16. doi: 10.1056/NEJMoa022252  
48 613 [published Online First: 2003/06/20]  
49 614 49. Pascual-Leone A, Amedi A, Fregni F, et al. The plastic human brain cortex. *Annual review of*  
50 615 *neuroscience* 2005;28:377-401. doi: 10.1146/annurev.neuro.27.070203.144216 [published  
51 616 Online First: 2005/07/19]  
52 617 50. Knaepen K, Goekint M, Heyman EM, et al. Neuroplasticity - exercise-induced response of  
53 618 peripheral brain-derived neurotrophic factor: a systematic review of experimental studies in

- 1  
2 619 human subjects. *Sports medicine (Auckland, NZ)* 2010;40(9):765-801. doi:  
3 620 10.2165/11534530-000000000-00000 [published Online First: 2010/08/24]  
4 621 51. Vance DE, Roberson AJ, McGuinness TM, et al. How neuroplasticity and cognitive reserve protect  
5 622 cognitive functioning. *Journal of psychosocial nursing and mental health services*  
6 623 2010;48(4):23-30. doi: 10.3928/02793695-20100302-01 [published Online First: 2010/03/31]  
7 624 52. Norton S, Matthews FE, Barnes DE, et al. Potential for primary prevention of Alzheimer's disease:  
8 625 an analysis of population-based data. *The Lancet Neurology* 2014;13(8):788-94. doi:  
9 626 10.1016/s1474-4422(14)70136-x [published Online First: 2014/07/18]  
10 627 53. Ngandu T, Lehtisalo J, Solomon A, et al. A 2 year multidomain intervention of diet, exercise,  
11 628 cognitive training, and vascular risk monitoring versus control to prevent cognitive decline in  
12 629 at-risk elderly people (FINGER): a randomised controlled trial. *Lancet (London, England)*  
13 630 2015;385(9984):2255-63. doi: 10.1016/s0140-6736(15)60461-5 [published Online First:  
14 631 2015/03/17]  
15  
16  
17  
18 632

For peer review only

1  
2  
3  
4  
5  
6  
7  
8  
9  
10  
11  
12  
13  
14  
15  
16  
17  
18  
19  
20  
21  
22  
23  
24  
25  
26  
27  
28  
29  
30  
31  
32  
33  
34  
35  
36  
37  
38  
39  
40  
41  
42  
43  
44  
45  
46





1  
2  
3  
4  
5  
6  
7  
8  
9  
10  
11  
12  
13  
14  
15  
16  
17  
18  
19  
20  
21  
22  
23  
24  
25  
26  
27  
28  
29  
30  
31  
32  
33  
34  
35  
36  
37  
38  
39  
40  
41  
42  
43  
44  
45  
46  
47  
48  
49  
50  
51  
52  
53  
54  
55  
56  
57  
58  
59  
60





# PRISMA 2009 Checklist

| Section/topic                      | #  | Checklist item                                                                                                                                                                                                                                                                                              | Reported on page #         |
|------------------------------------|----|-------------------------------------------------------------------------------------------------------------------------------------------------------------------------------------------------------------------------------------------------------------------------------------------------------------|----------------------------|
| <b>TITLE</b>                       |    |                                                                                                                                                                                                                                                                                                             |                            |
| Title                              | 1  | Identify the report as a systematic review, meta-analysis, or both.                                                                                                                                                                                                                                         | Page 1 (line 1-3)          |
| <b>ABSTRACT</b>                    |    |                                                                                                                                                                                                                                                                                                             |                            |
| Structured summary                 | 2  | Provide a structured summary including, as applicable: background; objectives; data sources; study eligibility criteria, participants, and interventions; study appraisal and synthesis methods; results; limitations; conclusions and implications of key findings; systematic review registration number. | Page 3-4 (line 40-67)      |
| <b>INTRODUCTION</b>                |    |                                                                                                                                                                                                                                                                                                             |                            |
| Rationale                          | 3  | Describe the rationale for the review in the context of what is already known.                                                                                                                                                                                                                              | Page 5-7 (line 127-132)    |
| Objectives                         | 4  | Provide an explicit statement of questions being addressed with reference to participants, interventions, comparisons, outcomes, and study design (PICOS).                                                                                                                                                  | Page 7 (line 133-144)      |
| <b>METHODS</b>                     |    |                                                                                                                                                                                                                                                                                                             |                            |
| Protocol and registration          | 5  | Indicate if a review protocol exists, if and where it can be accessed (e.g., Web address), and, if available, provide registration information including registration number.                                                                                                                               | Page 7 (line 149-151)      |
| Eligibility criteria               | 6  | Specify study characteristics (e.g., PICOS, length of follow-up) and report characteristics (e.g., years considered, language, publication status) used as criteria for eligibility, giving rationale.                                                                                                      | Page 8-9 (line 171-196)    |
| Information sources                | 7  | Describe all information sources (e.g., databases with dates of coverage, contact with study authors to identify additional studies) in the search and date last searched.                                                                                                                                  | Page 9-10 (line 197-214)   |
| Search                             | 8  | Present full electronic search strategy for at least one database, including any limits used, such that it could be repeated.                                                                                                                                                                               | Supplementary file 3 and 4 |
| Study selection                    | 9  | State the process for selecting studies (i.e., screening, eligibility, included in systematic review, and, if applicable, included in the meta-analysis).                                                                                                                                                   | Page 10 (line 215-218)     |
| Data collection process            | 10 | Describe method of data extraction from reports (e.g., piloted forms, independently, in duplicate) and any processes for obtaining and confirming data from investigators.                                                                                                                                  | Page 10 (line 219-226)     |
| Data items                         | 11 | List and define all variables for which data were sought (e.g., PICOS, funding sources) and any assumptions and simplifications made.                                                                                                                                                                       | Page 10 (line 222-226)     |
| Risk of bias in individual studies | 12 | Describe methods used for assessing risk of bias of individual studies (including specification of whether this was done at the study or outcome level), and how this information is to be used in any data synthesis.                                                                                      | Page 10-11 (line 227-233)  |
| Summary measures                   | 13 | State the principal summary measures (e.g., risk ratio, difference in means).                                                                                                                                                                                                                               | Page 11 (line 234-240)     |

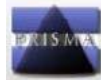

# PRISMA 2009 Checklist

|                      |    |                                                                                                                                                           |                        |
|----------------------|----|-----------------------------------------------------------------------------------------------------------------------------------------------------------|------------------------|
| Synthesis of results | 14 | Describe the methods of handling data and combining results of studies, if done, including measures of consistency (e.g., $I^2$ ) for each meta-analysis. | Page 11 (line 234-240) |
|----------------------|----|-----------------------------------------------------------------------------------------------------------------------------------------------------------|------------------------|

Page 1 of 2

| Section/topic                 | #  | Checklist item                                                                                                                                                                                           | Reported on page #                                           |
|-------------------------------|----|----------------------------------------------------------------------------------------------------------------------------------------------------------------------------------------------------------|--------------------------------------------------------------|
| Risk of bias across studies   | 15 | Specify any assessment of risk of bias that may affect the cumulative evidence (e.g., publication bias, selective reporting within studies).                                                             | NA                                                           |
| Additional analyses           | 16 | Describe methods of additional analyses (e.g., sensitivity or subgroup analyses, meta-regression), if done, indicating which were pre-specified.                                                         | NA                                                           |
| <b>RESULTS</b>                |    |                                                                                                                                                                                                          |                                                              |
| Study selection               | 17 | Give numbers of studies screened, assessed for eligibility, and included in the review, with reasons for exclusions at each stage, ideally with a flow diagram.                                          | Page 11 (line 238-243)<br>Figure 2 and figure 3              |
| Study characteristics         | 18 | For each study, present characteristics for which data were extracted (e.g., study size, PICOS, follow-up period) and provide the citations.                                                             | Page 11-12 (line 255-278)<br>Table 1 and table 2             |
| Risk of bias within studies   | 19 | Present data on risk of bias of each study and, if available, any outcome level assessment (see item 12).                                                                                                | Page 13-14<br>Table 1 and table 2                            |
| Results of individual studies | 20 | For all outcomes considered (benefits or harms), present, for each study: (a) simple summary data for each intervention group (b) effect estimates and confidence intervals, ideally with a forest plot. | Page 13-17 (line 288-351)<br>Table 1 and table 2             |
| Synthesis of results          | 21 | Present results of each meta-analysis done, including confidence intervals and measures of consistency.                                                                                                  | NA                                                           |
| Risk of bias across studies   | 22 | Present results of any assessment of risk of bias across studies (see Item 15).                                                                                                                          | Page 12 (line 264-266; line 273-278)<br>Supplementary file 5 |
| Additional analysis           | 23 | Give results of additional analyses, if done (e.g., sensitivity or subgroup analyses, meta-regression [see Item 16]).                                                                                    | NA                                                           |
| <b>DISCUSSION</b>             |    |                                                                                                                                                                                                          |                                                              |
| Summary of evidence           | 24 | Summarize the main findings including the strength of evidence for each main outcome; consider their relevance to key groups (e.g., healthcare providers, users, and policy makers).                     | Page 18                                                      |



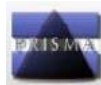

# PRISMA 2009 Checklist

|                |    |                                                                                                                                                               |                        |
|----------------|----|---------------------------------------------------------------------------------------------------------------------------------------------------------------|------------------------|
| Limitations    | 25 | Discuss limitations at study and outcome level (e.g., risk of bias), and at review-level (e.g., incomplete retrieval of identified research, reporting bias). | Page 19                |
| Conclusions    | 26 | Provide a general interpretation of the results in the context of other evidence, and implications for future research.                                       | Page 20                |
| <b>FUNDING</b> |    |                                                                                                                                                               |                        |
| Funding        | 27 | Describe sources of funding for the systematic review and other support (e.g., supply of data); role of funders for the systematic review.                    | Page 21 (line 423-425) |

From: Moher D, Liberati A, Tetzlaff J, Altman DG, The PRISMA Group (2009). Preferred Reporting Items for Systematic Reviews and Meta-Analyses: The PRISMA Statement. PLoS Med 6(6): e1000097. doi:10.1371/journal.pmed1000097

For more information, visit: [www.prisma-statement.org](http://www.prisma-statement.org).

Page 2 of 2

## Supplementary File 2: Inclusion and exclusion criteria

| Criteria              |                                                                                                                                                                                                                                                                                                                                                                                                                          |                                                                                                                                                                                                                                                                                                                                                                                                                                        |
|-----------------------|--------------------------------------------------------------------------------------------------------------------------------------------------------------------------------------------------------------------------------------------------------------------------------------------------------------------------------------------------------------------------------------------------------------------------|----------------------------------------------------------------------------------------------------------------------------------------------------------------------------------------------------------------------------------------------------------------------------------------------------------------------------------------------------------------------------------------------------------------------------------------|
| Category              | Inclusion                                                                                                                                                                                                                                                                                                                                                                                                                | Exclusion                                                                                                                                                                                                                                                                                                                                                                                                                              |
| Population            | - Adults (45 years or older) without a clinical diagnosis of cognitive impairment; this includes people with subjective cognitive impairment                                                                                                                                                                                                                                                                             | - People younger than 45 years<br>- People with a clinical diagnosis of impaired cognition (e.g., MMSE < 24)<br>- Populations comprised exclusively of patients with primary diseases with an increased risk for dementia such as Parkinson disease, HIV infection, multiple sclerosis, stroke, post traumatic brain injuries, infectious diseases, psychiatric conditions (e.g. alcohol abuse, drug abuse, major depressive disorder) |
| Subgroups             | - Age<br>- Sex/gender<br>- Race/ethnicity<br>- Level of education<br>- Duration of intervention                                                                                                                                                                                                                                                                                                                          |                                                                                                                                                                                                                                                                                                                                                                                                                                        |
| Geography             | No limit                                                                                                                                                                                                                                                                                                                                                                                                                 | No limit                                                                                                                                                                                                                                                                                                                                                                                                                               |
| Date of search        | Searches will go back until 1990                                                                                                                                                                                                                                                                                                                                                                                         |                                                                                                                                                                                                                                                                                                                                                                                                                                        |
| Settings              | Community-dwelling adults                                                                                                                                                                                                                                                                                                                                                                                                | Institutionalized people, e.g., people in nursing homes                                                                                                                                                                                                                                                                                                                                                                                |
| Interventions         | <b>For systematic review</b><br>- all cognitive activities that are provided by formal and non-formal educational institutions<br>- classes/courses/trainings that are based on individual interests and that are attended voluntarily<br><br><b>For overview of systematic reviews</b><br>Leisure activities that are cognitively stimulating and mimic the content of continuing education but in an informal setting. | Formal (vocational) education and training; physical activities, topics and courses that are related to any special job position and/or occupation                                                                                                                                                                                                                                                                                     |
| Control Interventions | No continuing education                                                                                                                                                                                                                                                                                                                                                                                                  | Any educational activities, physical activities                                                                                                                                                                                                                                                                                                                                                                                        |
| Outcomes              | <b>Health Outcomes</b><br>- Incidence of dementia<br>- Incidence of MCI<br>- Psychological wellbeing<br>- Functional capacity<br>- Quality of life<br>- Other relevant health outcomes<br><br><b>Intermediate Outcomes</b><br>- Cognitive functioning<br>- Cognitive (test) performance<br>- Social inclusion                                                                                                            |                                                                                                                                                                                                                                                                                                                                                                                                                                        |
| Timing                | Minimum duration of the intervention: 3 months<br>Minimum follow up time: 1 year                                                                                                                                                                                                                                                                                                                                         |                                                                                                                                                                                                                                                                                                                                                                                                                                        |
| Publication language  | No language restrictions                                                                                                                                                                                                                                                                                                                                                                                                 |                                                                                                                                                                                                                                                                                                                                                                                                                                        |
| Study design          | <b>For systematic reviews</b><br>- RCTs<br>- Nonrandomized controlled trials<br>- Prospective controlled cohort studies<br>- Retrospective controlled cohort studies<br>- Case-control studies<br>- Nonrandomized studies must have a minimum sample size of 300 or more participants<br><br><b>For overview of systematic reviews</b><br>-systematic reviews and meta-analyses                                          | - Case series<br>- Case reports<br>- Cross over trials<br>- Nonsystematic reviews<br>- Studies without a control group<br>- Nonrandomized studies with fewer than 300 participants                                                                                                                                                                                                                                                     |

### Supplementary file 3: Search Strategies of Systematic Review, by database

#### Medline (via PubMed):10 July 2017

| Medline |                                                                                                                                                                                                                        |         |
|---------|------------------------------------------------------------------------------------------------------------------------------------------------------------------------------------------------------------------------|---------|
| Search  | Query                                                                                                                                                                                                                  | Hits    |
| 1       | Dementia/ or exp Alzheimer Disease/                                                                                                                                                                                    | 117464  |
| 2       | Cognitive Dysfunction/                                                                                                                                                                                                 | 5918    |
| 3       | Cognition/                                                                                                                                                                                                             | 81481   |
| 4       | (dementia or alzheimer*).ti,ab.                                                                                                                                                                                        | 174908  |
| 5       | ((cognit* or memory or mental) adj3 (impair* or decline* or deficit* or reduc* or function*)).ti,ab.                                                                                                                   | 166793  |
| 6       | or/1-5                                                                                                                                                                                                                 | 370522  |
| 7       | Primary Prevention/                                                                                                                                                                                                    | 16883   |
| 8       | prevent*.ti,ab.                                                                                                                                                                                                        | 1207345 |
| 9       | (protect* or reduc* or delay* or improv*).ti.                                                                                                                                                                          | 710454  |
| 10      | or/7-9                                                                                                                                                                                                                 | 1858549 |
| 11      | 6 and 10                                                                                                                                                                                                               | 39070   |
| 12      | Dementia/pc or exp Alzheimer Disease/pc or Cognitive Dysfunction/pc [Prevention & Control]                                                                                                                             | 4039    |
| 13      | 11 or 12                                                                                                                                                                                                               | 41057   |
| 14      | exp Education, Continuing/                                                                                                                                                                                             | 60977   |
| 15      | ((continuing or adult) adj2 (education or training)).af.                                                                                                                                                               | 80639   |
| 16      | (lifelong learning or life-long learning).af.                                                                                                                                                                          | 2396    |
| 17      | education/ or exp curriculum/ or exp education, distance/ or exp education, nonprofessional/ or exp educational measurement/ or exp international educational exchange/ or mentoring/ or exp schools/ or exp teaching/ | 500562  |
| 18      | Learning/                                                                                                                                                                                                              | 56308   |
| 19      | Students/                                                                                                                                                                                                              | 47445   |
| 20      | exp Educational Status/                                                                                                                                                                                                | 47641   |
| 21      | (learn* or class or classes or course? or educat* or school* or train* or seminar* or tutor*).ti.                                                                                                                      | 569072  |
| 22      | education.fs. not exp Health Personnel/ed                                                                                                                                                                              | 200448  |
| 23      | (cognitiv* adj2 (stimulat* or activit*)).ti.                                                                                                                                                                           | 742     |
| 24      | or/14-23                                                                                                                                                                                                               | 1075912 |
| 25      | 13 and 24                                                                                                                                                                                                              | 3357    |
| 26      | exp Dementia/dt [Drug Therapy]                                                                                                                                                                                         | 17955   |
| 27      | 25 not 26                                                                                                                                                                                                              | 3243    |
| 28      | exp animals/ not exp humans/                                                                                                                                                                                           | 4438320 |
| 29      | 27 not 28                                                                                                                                                                                                              | 2497    |
| 30      | exp age groups/ not (exp aged/ or middle aged/)                                                                                                                                                                        | 3709828 |
| 31      | 29 not 30                                                                                                                                                                                                              | 1838    |
| 32      | limit 31 to yr="1990 -Current"                                                                                                                                                                                         | 1805    |
| 33      | remove duplicates from 32                                                                                                                                                                                              | 1695    |

**Medline (via PubMed): updated 5 April 2018**

| Search | Query                                                                                                                                                                                                                  | Results |
|--------|------------------------------------------------------------------------------------------------------------------------------------------------------------------------------------------------------------------------|---------|
| 1      | Dementia/ or exp Alzheimer Disease/                                                                                                                                                                                    | 118649  |
| 2      | Cognitive Dysfunction/                                                                                                                                                                                                 | 7920    |
| 3      | Cognition/                                                                                                                                                                                                             | 82659   |
| 4      | (dementia or alzheimer*).ti,ab.                                                                                                                                                                                        | 178991  |
| 5      | ((cognit* or memory or mental) adj3 (impair* or decline* or deficit* or reduc* or function*)).ti,ab.                                                                                                                   | 171636  |
| 6      | or/1-5                                                                                                                                                                                                                 | 378202  |
| 7      | Primary Prevention/                                                                                                                                                                                                    | 16649   |
| 8      | prevent*.ti,ab.                                                                                                                                                                                                        | 1222908 |
| 9      | (protect* or reduc* or delay* or improv* or increas* or decreas*).ti.                                                                                                                                                  | 1008130 |
| 10     | or/7-9                                                                                                                                                                                                                 | 2152629 |
| 11     | 6 and 10                                                                                                                                                                                                               | 46477   |
| 12     | Dementia/pc or exp Alzheimer Disease/pc or Cognitive Dysfunction/pc or Cognition Disorders/pc [Prevention & Control]                                                                                                   | 6391    |
| 13     | Cognitive Reserve/                                                                                                                                                                                                     | 388     |
| 14     | cognitive reserve.ti,ab.                                                                                                                                                                                               | 949     |
| 15     | or/11-14                                                                                                                                                                                                               | 50722   |
| 16     | exp Education, Continuing/                                                                                                                                                                                             | 58777   |
| 17     | ((continuing or adult) adj2 (education or training)).af.                                                                                                                                                               | 77985   |
| 18     | (lifelong learning or life-long learning).af.                                                                                                                                                                          | 2438    |
| 19     | education/ or exp curriculum/ or exp education, distance/ or exp education, nonprofessional/ or exp educational measurement/ or exp international educational exchange/ or mentoring/ or exp schools/ or exp teaching/ | 561833  |
| 20     | Learning/                                                                                                                                                                                                              | 57102   |
| 21     | Students/                                                                                                                                                                                                              | 48337   |
| 22     | exp Educational Status/                                                                                                                                                                                                | 47241   |
| 23     | (learn* or class or classes or course? or educat* or school* or train* or seminar* or tutor*).ti.                                                                                                                      | 571948  |
| 24     | education.fs. not exp Health Personnel/ed                                                                                                                                                                              | 199668  |
| 25     | (cognitiv* adj2 (stimulat* or activit*)).ti.                                                                                                                                                                           | 773     |
| 26     | (late-life adj2 (activity or activities or learn* or school* or educat* or training)).ti,ab.                                                                                                                           | 93      |
| 27     | or/16-26                                                                                                                                                                                                               | 1135186 |
| 28     | 15 and 27                                                                                                                                                                                                              | 4360    |
| 29     | exp Dementia/dt [Drug Therapy]                                                                                                                                                                                         | 18096   |
| 30     | 28 not 29                                                                                                                                                                                                              | 4227    |
| 31     | exp animals/ not exp humans/                                                                                                                                                                                           | 4439627 |
| 32     | 30 not 31                                                                                                                                                                                                              | 3347    |
| 33     | exp age groups/ not (exp aged/ or middle aged/)                                                                                                                                                                        | 3685655 |
| 34     | 32 not 33                                                                                                                                                                                                              | 2546    |
| 35     | (201707* or 201708* or 201709* or 20171* or 2018*).ed.                                                                                                                                                                 | 749049  |
| 36     | ("2017/07*" or "2017/08*" or "2017/09*" or "2017/1*" or 2018*).dt.                                                                                                                                                     | 942206  |
| 37     | 35 or 36                                                                                                                                                                                                               | 1540516 |
| 38     | 34 and 37                                                                                                                                                                                                              | 364     |
| 39     | limit 34 to yr="2017 -Current"                                                                                                                                                                                         | 348     |
| 40     | 38 or 39                                                                                                                                                                                                               | 435     |

## Cochrane Library (10 July 2017)

| Cochrane Library |                                                                                                                                                                                                                                          |        |
|------------------|------------------------------------------------------------------------------------------------------------------------------------------------------------------------------------------------------------------------------------------|--------|
| Search           | Query                                                                                                                                                                                                                                    | Hits   |
| #1               | [mh ^Dementia] or [mh "Alzheimer Disease"]                                                                                                                                                                                               | 4053   |
| #2               | [mh ^"Cognitive Dysfunction"]                                                                                                                                                                                                            | 0      |
| #3               | [mh ^Cognition]                                                                                                                                                                                                                          | 6276   |
| #4               | (dementia or alzheimer*):ti,ab,kw                                                                                                                                                                                                        | 11882  |
| #5               | ((cognit* or memory or mental) near/3 (impair* or decline* or deficit* or reduc* or function*)):ti,ab                                                                                                                                    | 16173  |
| #6               | {or #1-#5}                                                                                                                                                                                                                               | 27711  |
| #7               | [mh ^"Primary Prevention"]                                                                                                                                                                                                               | 1008   |
| #8               | prevent*:ti,ab,kw                                                                                                                                                                                                                        | 107750 |
| #9               | (protect* or reduc* or delay* or improv*):ti                                                                                                                                                                                             | 77161  |
| #10              | {or #7-#9}                                                                                                                                                                                                                               | 175365 |
| #11              | #6 and #10                                                                                                                                                                                                                               | 4432   |
| #12              | [mh Dementia/pc] or [mh ^"Cognitive Dysfunction"/pc]                                                                                                                                                                                     | 208    |
| #13              | #11 or #12                                                                                                                                                                                                                               | 4532   |
| #14              | [mh "Education, Continuing"]                                                                                                                                                                                                             | 1168   |
| #15              | ((continuing or adult) near/2 (education or training)):ti,ab,kw                                                                                                                                                                          | 2819   |
| #16              | ("lifelong learning" or "life-long learning"):ti,ab,kw                                                                                                                                                                                   | 19     |
| #17              | [mh ^education] or [mh curriculum] or [mh "education, distance"] or [mh "education, nonprofessional"] or [mh "educational measurement"] or [mh "international educational exchange"] or [mh ^mentoring] or [mh schools] or [mh teaching] | 21839  |
| #18              | [mh ^Learning]                                                                                                                                                                                                                           | 1809   |
| #19              | [mh ^Students]                                                                                                                                                                                                                           | 2041   |
| #20              | [mh "Educational Status"]                                                                                                                                                                                                                | 1348   |
| #21              | (learn* or class or classes or course or courses or educat* or school* or train* or seminar* or tutor*):ti                                                                                                                               | 45060  |
| #22              | (cognitiv* near/2 (stimulat* or activit*)):ti                                                                                                                                                                                            | 212    |
| #23              | (learning or ((education or training) near/2 (nonprofessional or non-professional or distance)) or teaching):kw                                                                                                                          | 12784  |
| #24              | {or #14-#23}                                                                                                                                                                                                                             | 67085  |
| #25              | #13 and #24                                                                                                                                                                                                                              | 784    |
| #26              | [mh "age groups"] not ([mh aged] or [mh "middle aged"])                                                                                                                                                                                  | 104635 |
| #27              | #25 not #26                                                                                                                                                                                                                              | 691    |
| #28              | #27 Publication Year from 1990 to 2017                                                                                                                                                                                                   | 691    |

## Cochrane Library (updated 9 April 2018)

| ID  | Search                                                                                                                                                                                                                                   | Hits   |
|-----|------------------------------------------------------------------------------------------------------------------------------------------------------------------------------------------------------------------------------------------|--------|
| #1  | [mh ^Dementia] or [mh "Alzheimer Disease"]                                                                                                                                                                                               | 4263   |
| #2  | [mh ^"Cognitive Dysfunction"]                                                                                                                                                                                                            | 450    |
| #3  | [mh ^Cognition]                                                                                                                                                                                                                          | 6675   |
| #4  | (dementia or alzheimer*):ti,ab,kw                                                                                                                                                                                                        | 13099  |
| #5  | ((cognit* or memory or mental) near/3 (impair* or decline* or deficit* or reduc* or function*)):ti,ab                                                                                                                                    | 18089  |
| #6  | {or #1-#5}                                                                                                                                                                                                                               | 30564  |
| #7  | [mh ^"Primary Prevention"]                                                                                                                                                                                                               | 1065   |
| #8  | prevent*:ti,ab,kw                                                                                                                                                                                                                        | 115159 |
| #9  | (protect* or reduc* or delay* or improv* or increas* or decreas*):ti                                                                                                                                                                     | 102653 |
| #10 | {or #7-#9}                                                                                                                                                                                                                               | 205354 |
| #11 | #6 and #10                                                                                                                                                                                                                               | 5434   |
| #12 | [mh Dementia/pc] or [mh ^"Cognitive Dysfunction"/pc] or [mh ^"Cognition Disorders"/pc]                                                                                                                                                   | 603    |
| #13 | [mh ^"Cognitive Reserve"]                                                                                                                                                                                                                | 8      |
| #14 | cognitive reserve:ti,ab,kw                                                                                                                                                                                                               | 51     |
| #15 | {or #11-#14}                                                                                                                                                                                                                             | 5791   |
| #16 | [mh "Education, Continuing"]                                                                                                                                                                                                             | 1209   |
| #17 | ((continuing or adult) near/2 (education or training)):ti,ab,kw                                                                                                                                                                          | 3051   |
| #18 | ("lifelong learning" or "life-long learning"):ti,ab,kw                                                                                                                                                                                   | 21     |
| #19 | [mh ^education] or [mh curriculum] or [mh "education, distance"] or [mh "education, nonprofessional"] or [mh "educational measurement"] or [mh "international educational exchange"] or [mh ^mentoring] or [mh schools] or [mh teaching] | 26602  |
| #20 | [mh ^Learning]                                                                                                                                                                                                                           | 1962   |
| #21 | [mh ^Students]                                                                                                                                                                                                                           | 2250   |
| #22 | [mh "Educational Status"]                                                                                                                                                                                                                | 1407   |
| #23 | (learn* or class or classes or course or courses or educat* or school* or train* or seminar* or tutor*):ti                                                                                                                               | 48313  |
| #24 | (cognitiv* near/2 (stimulat* or activit*)):ti                                                                                                                                                                                            | 246    |
| #25 | (learning or ((education or training) near/2 (nonprofessional or non-professional or distance)) or teaching):kw                                                                                                                          | 14622  |
| #26 | (late-life near/2 (activity or activities or learn* or school* or educat* or training)):ti,ab,kw                                                                                                                                         | 8      |
| #27 | {or #16-#26}                                                                                                                                                                                                                             | 75572  |
| #28 | #15 and #27                                                                                                                                                                                                                              | 1055   |
| #29 | [mh "age groups"] not ([mh aged] or [mh "middle aged"])                                                                                                                                                                                  | 109483 |
| #30 | #28 not #29                                                                                                                                                                                                                              | 937    |
| #31 | #30 Publication Year from 2017 to 2018                                                                                                                                                                                                   | 106    |

## Embase (10 July 2017)

| Embase |                                                                                                                                                                                                                                 |         |
|--------|---------------------------------------------------------------------------------------------------------------------------------------------------------------------------------------------------------------------------------|---------|
| Search | Query                                                                                                                                                                                                                           | Hits    |
| #1     | 'dementia'/de                                                                                                                                                                                                                   | 97110   |
| #2     | 'alzheimer disease'/exp                                                                                                                                                                                                         | 156558  |
| #3     | 'mild cognitive impairment'/exp                                                                                                                                                                                                 | 17067   |
| #4     | dementia:ti,ab OR alzheimer*:ti,ab                                                                                                                                                                                              | 226442  |
| #5     | ((cognit* OR memory OR mental) NEAR/3 (impair* OR decline* OR deficit* OR reduc* OR function*)):ti,ab                                                                                                                           | 221649  |
| #6     | #1 OR #2 OR #3 OR #4 OR #5                                                                                                                                                                                                      | 432689  |
| #7     | 'primary prevention'/exp                                                                                                                                                                                                        | 33540   |
| #8     | 'preventive medicine'/exp                                                                                                                                                                                                       | 25875   |
| #9     | prevent*:ti,ab                                                                                                                                                                                                                  | 1469112 |
| #10    | protect*:ti OR reduc*:ti OR delay*:ti OR improv*:ti                                                                                                                                                                             | 850362  |
| #11    | #7 OR #8 OR #9 OR #10                                                                                                                                                                                                           | 2260166 |
| #12    | #6 AND #11                                                                                                                                                                                                                      | 49357   |
| #13    | 'dementia'/dm_pc                                                                                                                                                                                                                | 1833    |
| #14    | 'mild cognitive impairment'/exp/dm_pc                                                                                                                                                                                           | 90      |
| #15    | 'alzheimer disease'/exp/dm_pc                                                                                                                                                                                                   | 4342    |
| #16    | #12 OR #13 OR #14 OR #15                                                                                                                                                                                                        | 52112   |
| #17    | 'continuing education'/exp OR 'continuing education provider'/exp                                                                                                                                                               | 29360   |
| #18    | ((continuing OR adult) NEAR/2 (education OR training)):ti,ab                                                                                                                                                                    | 24617   |
| #19    | lifelong learning':ti,ab OR 'life-long learning':ti,ab                                                                                                                                                                          | 1695    |
| #20    | 'education'/de OR 'adult education'/exp OR 'lifelong learning'/exp OR 'mentoring'/exp OR 'masters education'/exp OR 'postdoctoral education'/exp OR 'postgraduate education'/exp OR 'community college'/exp OR 'university'/exp | 466817  |
| #21    | learn*:ti OR class:ti OR classes:ti OR course*:ti OR educat*:ti OR school*:ti OR train*:ti OR seminar*:ti OR tutor*:ti                                                                                                          | 633869  |
| #22    | (cognitiv* NEAR/2 (stimulat* OR activit*)):ti                                                                                                                                                                                   | 930     |
| #23    | #17 OR #18 OR #19 OR #20 OR #21 OR #22                                                                                                                                                                                          | 1006895 |
| #24    | #16 AND #23                                                                                                                                                                                                                     | 3837    |
| #25    | 'animal'/exp NOT 'human'/exp                                                                                                                                                                                                    | 4833576 |
| #26    | #24 NOT #25                                                                                                                                                                                                                     | 2924    |
| #27    | 'groups by age'/exp NOT ('middle aged'/exp OR 'aged'/exp)                                                                                                                                                                       | 5653684 |
| #28    | #26 NOT #27                                                                                                                                                                                                                     | 2223    |
| #29    | #28 AND [1990-2017]/py                                                                                                                                                                                                          | 2199    |
| #30    | 'medication therapy management'/exp OR 'dementia'/exp/dm_dt OR 'pharmaceutical vehicles and additives'/exp                                                                                                                      | 1386295 |
| #31    | #29 NOT #30                                                                                                                                                                                                                     | 2022    |
| #32    | #31 NOT 'conference abstract'/it                                                                                                                                                                                                | 996     |

**Embase (updated 9 April 2018)**

| No. | Query                                                                                                                                                                                                                           | Hits    |
|-----|---------------------------------------------------------------------------------------------------------------------------------------------------------------------------------------------------------------------------------|---------|
| #1  | 'dementia'/exp                                                                                                                                                                                                                  | 308108  |
| #2  | 'alzheimer disease'/exp                                                                                                                                                                                                         | 167836  |
| #3  | 'mild cognitive impairment'/exp                                                                                                                                                                                                 | 19554   |
| #4  | dementia:ti,ab OR alzheimer*:ti,ab                                                                                                                                                                                              | 245698  |
| #5  | ((cognit* OR memory OR mental) NEAR/3 (impair* OR decline* OR deficit* OR reduc* OR function*)):ti,ab                                                                                                                           | 244483  |
| #6  | #1 OR #2 OR #3 OR #4 OR #5                                                                                                                                                                                                      | 519886  |
| #7  | 'primary prevention'/exp                                                                                                                                                                                                        | 35604   |
| #8  | 'preventive medicine'/exp                                                                                                                                                                                                       | 26670   |
| #9  | prevent*:ti,ab                                                                                                                                                                                                                  | 1576370 |
| #10 | protect*:ti OR reduc*:ti OR delay*:ti OR improv*:ti OR increas*:ti OR decreas*:ti                                                                                                                                               | 1272239 |
| #11 | #7 OR #8 OR #9 OR #10                                                                                                                                                                                                           | 2758722 |
| #12 | #6 AND #11                                                                                                                                                                                                                      | 66376   |
| #13 | 'dementia'/dm_pc                                                                                                                                                                                                                | 1929    |
| #14 | 'mild cognitive impairment'/exp/dm_pc                                                                                                                                                                                           | 101     |
| #15 | 'alzheimer disease'/exp/dm_pc                                                                                                                                                                                                   | 4515    |
| #16 | 'cognitive reserve'/exp                                                                                                                                                                                                         | 1346    |
| #17 | 'cognitive reserve':ti,ab                                                                                                                                                                                                       | 1463    |
| #18 | #12 OR #13 OR #14 OR #15 OR #16 OR #17                                                                                                                                                                                          | 70716   |
| #19 | 'continuing education'/exp OR 'continuing education provider'/exp                                                                                                                                                               | 30115   |
| #20 | ((continuing OR adult) NEAR/2 (education OR training)):ti,ab                                                                                                                                                                    | 25787   |
| #21 | 'lifelong learning':ti,ab OR 'life-long learning':ti,ab                                                                                                                                                                         | 1820    |
| #22 | 'education'/de OR 'adult education'/exp OR 'lifelong learning'/exp OR 'mentoring'/exp OR 'masters education'/exp OR 'postdoctoral education'/exp OR 'postgraduate education'/exp OR 'community college'/exp OR 'university'/exp | 492706  |
| #23 | learn*:ti OR class:ti OR classes:ti OR course*:ti OR educat*:ti OR school*:ti OR train*:ti OR seminar*:ti OR tutor*:ti                                                                                                          | 669572  |
| #24 | (cognitiv* NEAR/2 (stimulat* OR activit*)):ti                                                                                                                                                                                   | 1040    |
| #25 | ('late life' NEAR/2 (activity OR activities OR learn* OR school* OR educat* OR training)):ti,ab                                                                                                                                 | 131     |
| #26 | #19 OR #20 OR #21 OR #22 OR #23 OR #24 OR #25                                                                                                                                                                                   | 1064036 |
| #27 | #18 AND #26                                                                                                                                                                                                                     | 5231    |
| #28 | 'animal'/exp NOT 'human'/exp                                                                                                                                                                                                    | 5020589 |
| #29 | #27 NOT #28                                                                                                                                                                                                                     | 4140    |
| #30 | 'groups by age'/exp NOT ('middle aged'/exp OR 'aged'/exp)                                                                                                                                                                       | 6115551 |
| #31 | #29 NOT #30                                                                                                                                                                                                                     | 3114    |
| #32 | 'medication therapy management'/exp OR 'dementia'/exp/dm_dt OR 'pharmaceutical vehicles and additives'/exp                                                                                                                      | 1465869 |
| #33 | #31 NOT #32                                                                                                                                                                                                                     | 2862    |
| #34 | #33 NOT 'conference abstract'/it                                                                                                                                                                                                | 1380    |
| #35 | #34 AND [1-7-2017]/sd NOT [9-4-2018]/sd                                                                                                                                                                                         | 131     |
| #36 | #34 AND [2017-2018]/py                                                                                                                                                                                                          | 174     |
| #37 | #35 OR #36                                                                                                                                                                                                                      | 189     |



## CINHAL (10 July 2017)

| Search | Query                                                                                                                                                                                                                | Limiters/Expanders                      | Hits   |
|--------|----------------------------------------------------------------------------------------------------------------------------------------------------------------------------------------------------------------------|-----------------------------------------|--------|
| S1     | (MH "Dementia") OR (MH "Alzheimer's Disease")                                                                                                                                                                        | Search modes - Find all my search terms | 37751  |
| S2     | dementia OR alzheimer*                                                                                                                                                                                               | Search modes - Find all my search terms | 46604  |
| S3     | ((cognit* OR memory OR mental) N3 (impair* OR decline* OR deficit* OR reduc* OR function*))                                                                                                                          | Search modes - Find all my search terms | 29346  |
| S4     | S1 OR S2 OR S3                                                                                                                                                                                                       | Search modes - Find all my search terms | 67725  |
| S5     | (MH "Preventive Health Care")                                                                                                                                                                                        | Search modes - Find all my search terms | 1075   |
| S6     | TI prevent* OR AB prevent*                                                                                                                                                                                           | Search modes - Find all my search terms | 170718 |
| S7     | TI (protect* OR reduc* OR delay* OR improv*)                                                                                                                                                                         | Search modes - Find all my search terms | 124328 |
| S8     | S5 OR S6 OR S7                                                                                                                                                                                                       | Search modes - Find all my search terms | 290518 |
| S9     | S4 AND S8                                                                                                                                                                                                            | Search modes - Find all my search terms | 6261   |
| S10    | (MH "Dementia/PC") OR (MH "Alzheimer's Disease/PC")                                                                                                                                                                  | Search modes - Find all my search terms | 2009   |
| S11    | S9 OR S10                                                                                                                                                                                                            | Search modes - Find all my search terms | 7692   |
| S12    | (MH "Education, Continuing") OR (MH "Continuing Education Providers") OR (MH "Education, Diploma Programs") OR (MH "Education, Continuing (Credit)") OR (MH "Education, Masters") OR (MH "Education, Post-Doctoral") | Search modes - Find all my search terms | 87064  |
| S13    | (MH "Learning") OR (MH "Lifelong Learning")                                                                                                                                                                          | Search modes - Find all my search terms | 10771  |
| S14    | (MH "Education, Nonprofessional") OR (MH "Adult Education") OR (MH "Education, Non-Traditional+")                                                                                                                    | Search modes - Find all my search terms | 7406   |
| S15    | TI (learn* OR class OR classes OR course* OR educat* OR school* OR train* OR seminar* OR tutor*) OR TI (cognitiv* N2 (stimulat* OR activit*))                                                                        | Search modes - Find all my search terms | 180228 |

|    |     |                                   |                            |
|----|-----|-----------------------------------|----------------------------|
| 1  |     |                                   |                            |
| 2  |     |                                   |                            |
| 3  |     |                                   |                            |
| 4  |     | "lifelong learning" OR "life-long |                            |
| 5  |     | learning" OR ((continuing OR      |                            |
| 6  |     | adult) N2 (education OR           |                            |
| 7  |     | training))                        | Search modes - Find all my |
| 8  | S16 |                                   | search terms 106290        |
| 9  |     | S12 OR S13 OR S14 OR S15 OR       | Search modes - Find all my |
| 10 | S17 | S16                               | search terms 27,763        |
| 11 |     |                                   | Search modes - Find all my |
| 12 | S18 | S11 AND S17                       | search terms 667           |
| 13 |     |                                   | Search modes - Find all my |
| 14 | S19 | MH "Animal Studies"               | search terms 39763         |
| 15 |     |                                   | Search modes - Find all my |
| 16 | S20 | S18 NOT S19                       | search terms 618           |
| 17 |     |                                   | Search modes - Find all my |
| 18 |     | MH "Named Groups by Age+"         |                            |
| 19 |     | NOT (MH "Middle Age" OR MH        | Search modes - Find all my |
| 20 | S21 | "Aged+")                          | search terms 55371         |
| 21 |     |                                   | Search modes - Find all my |
| 22 | S22 | S20 NOT S21                       | search terms 552           |
| 23 |     |                                   | Limiters - Published Date: |
| 24 | S23 | S22                               | 19900101-20171231 557      |
| 25 |     |                                   |                            |
| 26 |     |                                   |                            |
| 27 |     |                                   |                            |
| 28 |     |                                   |                            |
| 29 |     |                                   |                            |
| 30 |     |                                   |                            |
| 31 |     |                                   |                            |
| 32 |     |                                   |                            |
| 33 |     |                                   |                            |
| 34 |     |                                   |                            |
| 35 |     |                                   |                            |
| 36 |     |                                   |                            |
| 37 |     |                                   |                            |
| 38 |     |                                   |                            |
| 39 |     |                                   |                            |
| 40 |     |                                   |                            |
| 41 |     |                                   |                            |
| 42 |     |                                   |                            |
| 43 |     |                                   |                            |
| 44 |     |                                   |                            |
| 45 |     |                                   |                            |
| 46 |     |                                   |                            |
| 47 |     |                                   |                            |
| 48 |     |                                   |                            |
| 49 |     |                                   |                            |
| 50 |     |                                   |                            |
| 51 |     |                                   |                            |
| 52 |     |                                   |                            |
| 53 |     |                                   |                            |
| 54 |     |                                   |                            |
| 55 |     |                                   |                            |
| 56 |     |                                   |                            |
| 57 |     |                                   |                            |
| 58 |     |                                   |                            |
| 59 |     |                                   |                            |
| 60 |     |                                   |                            |

### CINHAL (8 April 2018)

| Search | Query                                                                                                                                                                                                                | Limiters/Expanders                      | Results |
|--------|----------------------------------------------------------------------------------------------------------------------------------------------------------------------------------------------------------------------|-----------------------------------------|---------|
| S1     | (MH "Dementia") OR (MH "Alzheimer's Disease")                                                                                                                                                                        | Search modes - Find all my search terms | 40,224  |
| S2     | dementia OR alzheimer*                                                                                                                                                                                               | Search modes - Find all my search terms | 50,090  |
| S3     | ((cognit* OR memory OR mental) N3 (impair* OR decline* OR deficit* OR reduc* OR function*))                                                                                                                          | Search modes - Find all my search terms | 32,856  |
| S4     | S1 OR S2 OR S3                                                                                                                                                                                                       | Search modes - Find all my search terms | 73,809  |
| S5     | (MH "Preventive Health Care")                                                                                                                                                                                        | Search modes - Find all my search terms | 11,313  |
| S6     | TI prevent* OR AB prevent*                                                                                                                                                                                           | Search modes - Find all my search terms | 186,284 |
| S7     | TI (protect* OR reduc* OR delay* OR improv*)                                                                                                                                                                         | Search modes - Find all my search terms | 134,37  |
| S8     | S5 OR S6 OR S7                                                                                                                                                                                                       | Search modes - Find all my search terms | 315,336 |
| S9     | S4 AND S8                                                                                                                                                                                                            | Search modes - Find all my search terms | 7,002   |
| S10    | (MH "Dementia/PC") OR (MH "Alzheimer's Disease/PC")                                                                                                                                                                  | Search modes - Find all my search terms | 2,127   |
| S11    | S9 OR S10                                                                                                                                                                                                            | Search modes - Find all my search terms | 8,479   |
| S12    | (MH "Education, Continuing") OR (MH "Continuing Education Providers") OR (MH "Education, Diploma Programs") OR (MH "Education, Continuing (Credit)") OR (MH "Education, Masters") OR (MH "Education, Post-Doctoral") | Search modes - Find all my search terms | 89,104  |
| S13    | (MH "Learning") OR (MH "Lifelong Learning")                                                                                                                                                                          | Search modes - Find all my search terms | 11,971  |
| S14    | (MH "Education, Nonprofessional") OR (MH "Adult Education") OR (MH "Education, Non-Traditional+")                                                                                                                    | Search modes - Find all my search terms | 7,799   |
| S15    | TI (learn* OR class OR classes OR course* OR educat* OR school* OR train* OR seminar* OR tutor*) OR TI (cognitiv* N2 (stimulat* OR activit*))                                                                        | Search modes - Find all my search terms | 191,967 |
| S16    | "lifelong learning" OR "life-long learning" OR ((continuing OR adult) N2 (education OR training)) OR ("late life" N1 (activity OR activities OR learn* OR school* OR educat* OR training))                           | Search modes - Find all my search terms | 109,49  |

|    |     |                                                               |                                         |         |
|----|-----|---------------------------------------------------------------|-----------------------------------------|---------|
| 1  |     |                                                               |                                         |         |
| 2  |     |                                                               |                                         |         |
| 3  | S17 | S12 OR S13 OR S14 OR S15 OR S16                               | Search modes - Find all my search terms | 290,595 |
| 4  |     |                                                               |                                         |         |
| 5  | S18 | S11 AND S17                                                   | Search modes - Find all my search terms | 753     |
| 6  |     |                                                               |                                         |         |
| 7  | S19 | MH "Animal Studies"                                           | Search modes - Find all my search terms | 43,810  |
| 8  |     |                                                               |                                         |         |
| 9  | S20 | S18 NOT S19                                                   | Search modes - Find all my search terms | 691     |
| 10 |     |                                                               |                                         |         |
| 11 | S21 | MH "Named Groups by Age+" NOT (MH "Middle Age" OR MH "Aged+") | Search modes - Find all my search terms | 595,044 |
| 12 |     |                                                               |                                         |         |
| 13 | S22 | S20 NOT S21                                                   | Search modes - Find all my search terms | 617     |
| 14 |     |                                                               |                                         |         |
| 15 | S23 | S22                                                           | Limiters - Published Date: 20170101-    | 78      |
| 16 |     |                                                               |                                         |         |
| 17 | S24 | S22 AND EM 20170701-                                          | Search modes - Find all my search terms | 66      |
| 18 |     |                                                               |                                         |         |
| 19 | S25 | S23 OR S24                                                    | Search modes - Find all my search terms | 95      |
| 20 |     |                                                               |                                         |         |
| 21 |     |                                                               |                                         |         |
| 22 |     |                                                               |                                         |         |
| 23 |     |                                                               |                                         |         |
| 24 |     |                                                               |                                         |         |
| 25 |     |                                                               |                                         |         |
| 26 |     |                                                               |                                         |         |
| 27 |     |                                                               |                                         |         |
| 28 |     |                                                               |                                         |         |
| 29 |     |                                                               |                                         |         |
| 30 |     |                                                               |                                         |         |
| 31 |     |                                                               |                                         |         |
| 32 |     |                                                               |                                         |         |
| 33 |     |                                                               |                                         |         |
| 34 |     |                                                               |                                         |         |
| 35 |     |                                                               |                                         |         |
| 36 |     |                                                               |                                         |         |
| 37 |     |                                                               |                                         |         |
| 38 |     |                                                               |                                         |         |
| 39 |     |                                                               |                                         |         |
| 40 |     |                                                               |                                         |         |
| 41 |     |                                                               |                                         |         |
| 42 |     |                                                               |                                         |         |
| 43 |     |                                                               |                                         |         |
| 44 |     |                                                               |                                         |         |
| 45 |     |                                                               |                                         |         |
| 46 |     |                                                               |                                         |         |
| 47 |     |                                                               |                                         |         |
| 48 |     |                                                               |                                         |         |
| 49 |     |                                                               |                                         |         |
| 50 |     |                                                               |                                         |         |
| 51 |     |                                                               |                                         |         |
| 52 |     |                                                               |                                         |         |
| 53 |     |                                                               |                                         |         |
| 54 |     |                                                               |                                         |         |
| 55 |     |                                                               |                                         |         |
| 56 |     |                                                               |                                         |         |
| 57 |     |                                                               |                                         |         |
| 58 |     |                                                               |                                         |         |
| 59 |     |                                                               |                                         |         |
| 60 |     |                                                               |                                         |         |

## ERIC (10 July 2017)

| Search | Query                                                                                                                                                                                                                                                                                                          | Limiters/Expanders                      | Hits   |
|--------|----------------------------------------------------------------------------------------------------------------------------------------------------------------------------------------------------------------------------------------------------------------------------------------------------------------|-----------------------------------------|--------|
| S1     | DE "Dementia" OR DE "Alzheimers Disease"                                                                                                                                                                                                                                                                       | Search modes - Find all my search terms | 1036   |
| S2     | DE "Cognitive Ability"                                                                                                                                                                                                                                                                                         | Search modes - Find all my search terms | 8133   |
| S3     | dementia OR alzheimer*                                                                                                                                                                                                                                                                                         | Search modes - Find all my search terms | 1286   |
| S4     | ((cognit* OR memory OR mental) N3 (impair* OR decline* OR deficit* OR reduc* OR function*))                                                                                                                                                                                                                    | Search modes - Find all my search terms | 6424   |
| S5     | S1 OR S2 OR S3 OR S4                                                                                                                                                                                                                                                                                           | Search modes - Find all my search terms | 14489  |
| S6     | (DE "Early Intervention" OR DE "Prevention") OR (DE "Preventive Medicine")                                                                                                                                                                                                                                     | Search modes - Find all my search terms | 22132  |
| S7     | TI prevent* OR AB prevent*                                                                                                                                                                                                                                                                                     | Search modes - Find all my search terms | 33142  |
| S8     | TI (protect* OR reduc* OR delay* OR improv*)                                                                                                                                                                                                                                                                   | Search modes - Find all my search terms | 30866  |
| S9     | S6 OR S7 OR S8                                                                                                                                                                                                                                                                                                 | Search modes - Find all my search terms | 71745  |
| S10    | S5 AND S9                                                                                                                                                                                                                                                                                                      | Search modes - Find all my search terms | 828    |
| S11    | DE "Adult Education" OR DE "Adult Basic Education" OR DE "Continuing Education" OR DE "Migrant Adult Education" OR DE "Preretirement Education" OR DE "Public School Adult Education" OR DE "Veterans Education"                                                                                               | Search modes - Find all my search terms | 56528  |
| S12    | DE "Adult Learning" OR DE "Adult Programs" OR DE "Adult Reading Programs" OR DE "High School Equivalency Programs" OR DE "Evening Programs" OR DE "Part Time Students" OR DE "Distance Education" OR DE "Extension Education" OR DE "External Degree Programs" OR DE "Rural Extension" OR DE "Urban Extension" | Search modes - Find all my search terms | 35681  |
| S13    | (DE "Adult Students") OR (DE "Evening Students")                                                                                                                                                                                                                                                               | Search modes - Find all my search terms | 7787   |
| S14    | ((DE "Nonschool Educational Programs") OR (DE "Community Education")) OR (DE "Postsecondary Education" OR DE "Higher Education")                                                                                                                                                                               | Search modes - Find all my search terms | 431319 |

|    |     |                                                                   |                                                 |        |
|----|-----|-------------------------------------------------------------------|-------------------------------------------------|--------|
| 1  |     |                                                                   |                                                 |        |
| 2  |     |                                                                   |                                                 |        |
| 3  |     |                                                                   |                                                 |        |
| 4  | S15 | DE "Continuing Education Units" OR<br>DE "Lifelong Learning"      | Search modes - Find all my<br>search terms      | 8046   |
| 5  |     |                                                                   |                                                 |        |
| 6  |     | TI (learn* OR class OR classes OR                                 |                                                 |        |
| 7  | S16 | course* OR educat* OR school* OR<br>train* OR seminar* OR tutor*) | Search modes - Find all my<br>search terms      | 555016 |
| 8  |     |                                                                   |                                                 |        |
| 9  |     | TI (cognitiv* N2 (stimulat* OR                                    |                                                 |        |
| 10 | S17 | activit*))                                                        | Search modes - Find all my<br>search terms      | 94     |
| 11 |     |                                                                   |                                                 |        |
| 12 | S18 | ((continuing OR adult) N2 (education<br>OR training))             | Search modes - Find all my<br>search terms      | 76187  |
| 13 |     |                                                                   |                                                 |        |
| 14 | S19 | "lifelong learning" or "life-long<br>learning"                    | Search modes - Find all my<br>search terms      | 10135  |
| 15 |     |                                                                   |                                                 |        |
| 16 | S20 | S11 OR S12 OR S13 OR S14 OR S15 OR<br>S16 OR S17 OR S18 OR S19    | Search modes - Find all my<br>search terms      | 851728 |
| 17 |     |                                                                   |                                                 |        |
| 18 |     |                                                                   |                                                 |        |
| 19 | S21 | S10 AND S20                                                       | Search modes - Find all my<br>search terms      | 286    |
| 20 |     |                                                                   |                                                 |        |
| 21 |     |                                                                   |                                                 |        |
| 22 | S22 | S21                                                               | Limiters - Date Published:<br>19900101-20171231 | 234    |
| 23 |     |                                                                   |                                                 |        |
| 24 |     |                                                                   |                                                 |        |
| 25 |     |                                                                   |                                                 |        |
| 26 |     |                                                                   |                                                 |        |
| 27 |     |                                                                   |                                                 |        |
| 28 |     |                                                                   |                                                 |        |
| 29 |     |                                                                   |                                                 |        |
| 30 |     |                                                                   |                                                 |        |
| 31 |     |                                                                   |                                                 |        |
| 32 |     |                                                                   |                                                 |        |
| 33 |     |                                                                   |                                                 |        |
| 34 |     |                                                                   |                                                 |        |
| 35 |     |                                                                   |                                                 |        |
| 36 |     |                                                                   |                                                 |        |
| 37 |     |                                                                   |                                                 |        |
| 38 |     |                                                                   |                                                 |        |
| 39 |     |                                                                   |                                                 |        |
| 40 |     |                                                                   |                                                 |        |
| 41 |     |                                                                   |                                                 |        |
| 42 |     |                                                                   |                                                 |        |
| 43 |     |                                                                   |                                                 |        |
| 44 |     |                                                                   |                                                 |        |
| 45 |     |                                                                   |                                                 |        |
| 46 |     |                                                                   |                                                 |        |
| 47 |     |                                                                   |                                                 |        |
| 48 |     |                                                                   |                                                 |        |
| 49 |     |                                                                   |                                                 |        |
| 50 |     |                                                                   |                                                 |        |
| 51 |     |                                                                   |                                                 |        |
| 52 |     |                                                                   |                                                 |        |
| 53 |     |                                                                   |                                                 |        |
| 54 |     |                                                                   |                                                 |        |
| 55 |     |                                                                   |                                                 |        |
| 56 |     |                                                                   |                                                 |        |
| 57 |     |                                                                   |                                                 |        |
| 58 |     |                                                                   |                                                 |        |
| 59 |     |                                                                   |                                                 |        |
| 60 |     |                                                                   |                                                 |        |

**ERIC (8 April 2018)**

| Search | Query                                                                                                                                                                                                                                                                                                          | Limiters/Expanders                      | Results |
|--------|----------------------------------------------------------------------------------------------------------------------------------------------------------------------------------------------------------------------------------------------------------------------------------------------------------------|-----------------------------------------|---------|
| S1     | DE "Dementia" OR DE "Alzheimers Disease"                                                                                                                                                                                                                                                                       | Search modes - Find all my search terms | 1,075   |
| S2     | DE "Cognitive Ability"                                                                                                                                                                                                                                                                                         | Search modes - Find all my search terms | 8,553   |
| S3     | dementia OR alzheimer*                                                                                                                                                                                                                                                                                         | Search modes - Find all my search terms | 1,332   |
| S4     | ((cognit* OR memory OR mental) N3 (impair* OR decline* OR deficit* OR reduc* OR function*))                                                                                                                                                                                                                    | Search modes - Find all my search terms | 6,684   |
| S5     | S1 OR S2 OR S3 OR S4                                                                                                                                                                                                                                                                                           | Search modes - Find all my search terms | 15,155  |
| S6     | (DE "Early Intervention" OR DE "Prevention") OR (DE "Preventive Medicine")                                                                                                                                                                                                                                     | Search modes - Find all my search terms | 22,911  |
| S7     | TI prevent* OR AB prevent*                                                                                                                                                                                                                                                                                     | Search modes - Find all my search terms | 34,284  |
| S8     | TI (protect* OR reduc* OR delay* OR improv*)                                                                                                                                                                                                                                                                   | Search modes - Find all my search terms | 32,348  |
| S9     | S6 OR S7 OR S8                                                                                                                                                                                                                                                                                                 | Search modes - Find all my search terms | 74,665  |
| S10    | S5 AND S9                                                                                                                                                                                                                                                                                                      | Search modes - Find all my search terms | 873     |
| S11    | DE "Adult Education" OR DE "Adult Basic Education" OR DE "Continuing Education" OR DE "Migrant Adult Education" OR DE "Preretirement Education" OR DE "Public School Adult Education" OR DE "Veterans Education"                                                                                               | Search modes - Find all my search terms | 57,669  |
| S12    | DE "Adult Learning" OR DE "Adult Programs" OR DE "Adult Reading Programs" OR DE "High School Equivalency Programs" OR DE "Evening Programs" OR DE "Part Time Students" OR DE "Distance Education" OR DE "Extension Education" OR DE "External Degree Programs" OR DE "Rural Extension" OR DE "Urban Extension" | Search modes - Find all my search terms | 36,853  |
| S13    | (DE "Adult Students") OR (DE "Evening Students")                                                                                                                                                                                                                                                               | Search modes - Find all my search terms | 8,01    |
| S14    | ((DE "Nonschool Educational Programs") OR (DE "Community Education")) OR (DE "Postsecondary Education" OR DE "Higher Education")                                                                                                                                                                               | Search modes - Find all my search terms | 452,212 |
| S15    | DE "Continuing Education Units" OR DE "Lifelong Learning"                                                                                                                                                                                                                                                      | Search modes - Find all my search terms | 8,311   |
| S16    | TI (learn* OR class OR classes OR course* OR educat* OR school* OR train* OR seminar* OR tutor*)                                                                                                                                                                                                               | Search modes - Find all my search terms | 579,695 |

|    |     |                                                                                     |                                         |         |
|----|-----|-------------------------------------------------------------------------------------|-----------------------------------------|---------|
| 1  |     |                                                                                     |                                         |         |
| 2  |     |                                                                                     |                                         |         |
| 3  | S17 | T1 (cognitiv* N2 (stimulat* OR activit*))                                           | Search modes - Find all my search terms | 102     |
| 4  |     |                                                                                     |                                         |         |
| 5  | S18 | ((continuing OR adult) N2 (education OR training))                                  | Search modes - Find all my search terms | 77,861  |
| 6  |     |                                                                                     |                                         |         |
| 7  | S19 | "late life" N2 (activity OR activities OR learn* OR school* OR educat* OR training) | Search modes - Find all my search terms | 17      |
| 8  |     |                                                                                     |                                         |         |
| 9  | S20 | "lifelong learning" OR "life-long learning"                                         | Search modes - Find all my search terms | 10,521  |
| 10 |     |                                                                                     |                                         |         |
| 11 | S21 | S11 OR S12 OR S13 OR S14 OR S15 OR S16 OR S17 OR S18 OR S19 OR S20                  | Search modes - Find all my search terms | 887,984 |
| 12 |     |                                                                                     |                                         |         |
| 13 | S22 | S10 AND S21                                                                         | Search modes - Find all my search terms | 309     |
| 14 |     |                                                                                     |                                         |         |
| 15 | S23 | S22                                                                                 | Limiters - Date Published: 20170101-    | 16      |
| 16 |     |                                                                                     |                                         |         |
| 17 | S24 | S22 AND EM 20170701-                                                                | Search modes - Find all my search terms | 0       |
| 18 |     |                                                                                     |                                         |         |
| 19 | S25 | S23 OR S24                                                                          | Search modes - Find all my search terms | 16      |
| 20 |     |                                                                                     |                                         |         |
| 21 |     |                                                                                     |                                         |         |
| 22 |     |                                                                                     |                                         |         |
| 23 |     |                                                                                     |                                         |         |
| 24 |     |                                                                                     |                                         |         |
| 25 |     |                                                                                     |                                         |         |
| 26 |     |                                                                                     |                                         |         |
| 27 |     |                                                                                     |                                         |         |
| 28 |     |                                                                                     |                                         |         |
| 29 |     |                                                                                     |                                         |         |
| 30 |     |                                                                                     |                                         |         |
| 31 |     |                                                                                     |                                         |         |
| 32 |     |                                                                                     |                                         |         |
| 33 |     |                                                                                     |                                         |         |
| 34 |     |                                                                                     |                                         |         |
| 35 |     |                                                                                     |                                         |         |
| 36 |     |                                                                                     |                                         |         |
| 37 |     |                                                                                     |                                         |         |
| 38 |     |                                                                                     |                                         |         |
| 39 |     |                                                                                     |                                         |         |
| 40 |     |                                                                                     |                                         |         |
| 41 |     |                                                                                     |                                         |         |
| 42 |     |                                                                                     |                                         |         |
| 43 |     |                                                                                     |                                         |         |
| 44 |     |                                                                                     |                                         |         |
| 45 |     |                                                                                     |                                         |         |
| 46 |     |                                                                                     |                                         |         |
| 47 |     |                                                                                     |                                         |         |
| 48 |     |                                                                                     |                                         |         |
| 49 |     |                                                                                     |                                         |         |
| 50 |     |                                                                                     |                                         |         |
| 51 |     |                                                                                     |                                         |         |
| 52 |     |                                                                                     |                                         |         |
| 53 |     |                                                                                     |                                         |         |
| 54 |     |                                                                                     |                                         |         |
| 55 |     |                                                                                     |                                         |         |
| 56 |     |                                                                                     |                                         |         |
| 57 |     |                                                                                     |                                         |         |
| 58 |     |                                                                                     |                                         |         |
| 59 |     |                                                                                     |                                         |         |
| 60 |     |                                                                                     |                                         |         |



1  
2  
3  
4  
5  
6  
7  
8  
9  
10  
11  
12  
13  
14  
15  
16  
17  
18  
19  
20  
21  
22  
23  
24  
25  
26  
27  
28  
29  
30  
31  
32  
33  
34  
35  
36  
37  
38  
39  
40  
41  
42  
43  
44  
45  
46  
47  
48  
49  
50  
51  
52  
53  
54  
55  
56  
57  
58  
59  
60

### PsycINFO (11 July 2017)

| Search | Query                                                                                                                                                                                          | Limiters/Expanders                           | Results   |
|--------|------------------------------------------------------------------------------------------------------------------------------------------------------------------------------------------------|----------------------------------------------|-----------|
| S1     | DE "Alzheimer's Disease"                                                                                                                                                                       | Search modes - Find all my search terms      | 39,900    |
| S2     | DE "Senile Dementia"                                                                                                                                                                           | Search modes - Find all my search terms      | 1,063     |
| S3     | DE "Cognitive Impairment"                                                                                                                                                                      | Search modes - Find all my search terms      | 30,409    |
| S4     | S1 OR S2 OR S3                                                                                                                                                                                 | Search modes - Find all my search terms      | 65,198    |
| S5     | DE "Prevention" OR DE "Preventive Medicine" OR DE "Primary Mental Health Prevention"                                                                                                           | Search modes - Find all my search terms      | 30,316    |
| S6     | TI prevent* OR AB prevent*                                                                                                                                                                     | Search modes - Find all my search terms      | 186,041   |
| S7     | TI protect* OR reduc* OR delay* OR improv*                                                                                                                                                     | Search modes - Find all my search terms      | 743,335   |
| S8     | S5 OR S6 OR S7                                                                                                                                                                                 | Search modes - Find all my search terms      | 869,214   |
| S9     | S4 AND S8                                                                                                                                                                                      | Search modes - Find all my search terms      | 21,587    |
| S10    | DE "Adult Education" OR DE "Continuing Education"                                                                                                                                              | Search modes - Find all my search terms      | 4,126     |
| S11    | TI (learning OR education OR educational OR training)                                                                                                                                          | Search modes - Find all my search terms      | 259,848   |
| S12    | TI cognitiv* N1 (stimulat* OR activit*)                                                                                                                                                        | Search modes - Find all my search terms      | 751       |
| S13    | "lifelong learning" OR "life-long learning"                                                                                                                                                    | Search modes - Find all my search terms      | 2,995     |
| S14    | (continuing OR adult) N2 (education OR training)                                                                                                                                               | Search modes - Find all my search terms      | 15,241    |
| S15    | S9 AND S11                                                                                                                                                                                     | Search modes - Find all my search terms      | 826       |
| S16    | (ZG "adolescence (13-17 yrs)" or ZG "adulthood (18 yrs & older)" or ZG "childhood (birth-12 yrs)") not (ZG "aged (65 yrs & older)" or ZG "middle age (40-64 yrs)")                             | Search modes - Find all my search terms      | 1,626,731 |
| S17    | S15 NOT S16                                                                                                                                                                                    | Search modes - Find all my search terms      | 683       |
| S18    | (DE "Health Education") OR (DE "Drug Therapy") OR (DE "Animals") OR DE "Animal Models" OR TI (rat OR rats OR mouse OR mice OR dog OR dogs) OR SU (rat OR rats OR mouse OR mice OR dog OR dogs) | Search modes - Find all my search terms      | 454,796   |
| S19    | S17 NOT S18                                                                                                                                                                                    | Search modes - Find all my search terms      | 414       |
| S20    | S17 NOT S18                                                                                                                                                                                    | Limiters - Published Date: 19900101-20171231 | 403       |

**PsycINFO (9 April 2018)**

| #   | Query                                                                                       | Limiters/Expanders                      | Results |
|-----|---------------------------------------------------------------------------------------------|-----------------------------------------|---------|
| S1  | DE "Alzheimer's Disease"                                                                    | Search modes - Find all my search terms | 41,992  |
| S2  | DE "Senile Dementia"                                                                        | Search modes - Find all my search terms | 1,063   |
| S3  | DE "Cognitive Impairment"                                                                   | Search modes - Find all my search terms | 32,064  |
| S4  | dementia OR alzheimer*                                                                      | Search modes - Find all my search terms | 99,018  |
| S5  | ((cognit* OR memory OR mental) N3 (impair* OR decline* OR deficit* OR reduc* OR function*)) | Search modes - Find all my search terms | 146,484 |
| S6  | S1 OR S2 OR S3 OR S4 OR S5                                                                  | Search modes - Find all my search terms | 210,638 |
| S7  | DE "Prevention" OR DE "Preventive Medicine" OR DE "Primary Mental Health Prevention"        | Search modes - Find all my search terms | 31,621  |
| S8  | TI prevent* OR AB prevent*                                                                  | Search modes - Find all my search terms | 195,469 |
| S9  | TI protect* OR reduc* OR delay* OR improv*                                                  | Search modes - Find all my search terms | 783,317 |
| S10 | S7 OR S8 OR S9                                                                              | Search modes - Find all my search terms | 914,878 |
| S11 | S6 AND S10                                                                                  | Search modes - Find all my search terms | 71,575  |
| S12 | DE "Cognitive Reserve"                                                                      | Search modes - Find all my search terms | 353     |
| S13 | "Cognitive Reserve"                                                                         | Search modes - Find all my search terms | 985     |
| S14 | S11 OR S12 OR S13                                                                           | Search modes - Find all my search terms | 72,193  |
| S15 | DE "Adult Education" OR DE "Continuing Education"                                           | Search modes - Find all my search terms | 4,2     |
| S16 | TI (learning OR education OR educational OR training)                                       | Search modes - Find all my search terms | 269,992 |
| S17 | TI cognitiv* N1 (stimulat* OR activit*)                                                     | Search modes - Find all my search terms | 794     |
| S18 | "lifelong learning" OR "life-long learning"                                                 | Search modes - Find all my search terms | 3,169   |
| S19 | (continuing OR adult) N2 (education OR training)                                            | Search modes - Find all my search terms | 15,885  |
| S20 | "late life" N2 (activity OR activities OR learn* OR school* OR educat* OR training)         | Search modes - Find all my search terms | 159     |
| S21 | S15 OR S16 OR S17 OR S18 OR S19 OR S20                                                      | Search modes - Find all my search terms | 281,675 |

|     |                                                                                                                                                                                                |                                         |           |
|-----|------------------------------------------------------------------------------------------------------------------------------------------------------------------------------------------------|-----------------------------------------|-----------|
| S22 | S14 AND S21                                                                                                                                                                                    | Search modes - Find all my search terms | 4,549     |
| S23 | (ZG "adolescence (13-17 yrs)" or ZG "adulthood (18 yrs & older)" or ZG "childhood (birth-12 yrs)") not (ZG "aged (65 yrs & older)" or ZG "middle age (40-64 yrs)")                             | Search modes - Find all my search terms | 1,695,649 |
| S24 | S22 NOT S23                                                                                                                                                                                    | Search modes - Find all my search terms | 3,295     |
| S25 | (DE "Health Education") OR (DE "Drug Therapy") OR (DE "Animals") OR DE "Animal Models" OR TI (rat OR rats OR mouse OR mice OR dog OR dogs) OR SU (rat OR rats OR mouse OR mice OR dog OR dogs) | Search modes - Find all my search terms | 465,312   |
| S26 | S24 NOT S25                                                                                                                                                                                    | Search modes - Find all my search terms | 2,094     |
| S27 | S26                                                                                                                                                                                            | Limiters - Publication Year: 2017-      | 276       |
| S28 | S26 AND RD 201707-                                                                                                                                                                             | Search modes - Find all my search terms | 197       |
| S29 | S27 OR S28                                                                                                                                                                                     | Search modes - Find all my search terms | 299       |

**ClinicalTrials.gov (16 May 2017)**

**280 studies found for:** (prevention OR reduction OR risk OR improvement) AND (dementia OR alzheimer OR "cognitive impairment" OR "cognitive decline") | healthy OR aged OR adult OR cognitive | education OR learning OR lesson OR educational OR class OR mental OR cognitive | Adult, Senior | Studies that accept healthy volunteers

**ClinicalTrials.gov (9 April 2018)**

**58 Studies found for:** (prevention OR reduction OR risk OR improvement) AND (dementia OR alzheimer OR "cognitive impairment" OR "cognitive decline") | healthy OR aged OR adult OR cognitive | education OR learning OR lesson OR educational OR class OR mental OR cognitive | Adult, Senior | Studies that accept healthy volunteers | First posted from 05/01/2017 to 04/09/2018

**ICTRP (16 May 2017)**

| ICTRP    |                                     |                                                                                                                                                              |
|----------|-------------------------------------|--------------------------------------------------------------------------------------------------------------------------------------------------------------|
| Search 1 | 21 records for 20 trials found for: | dementia AND education* AND prevent* OR alzheimer AND education* AND prevent* OR cognitive impairment AND education* AND prevent*                            |
| Search 2 | 3 records for 3 trials found for:   | dementia AND mental activ* AND prevent* OR alzheimer AND mental activ* AND prevent* OR cognitive impairment AND mental activ* AND prevent*                   |
| Search 3 | 3 records for 3 trials found for:   | dementia AND cognitive stimulat* AND prevent* OR alzheimer AND cognitive stimulat* AND prevent* OR cognitive impairment AND cognitive stimulat* AND prevent* |
| Search 4 | 11 records for 11 trials found for: | dementia AND learning AND prevent* OR alzheimer AND learning AND prevent* OR cognitive impairment AND learning AND prevent*                                  |
| Search 5 | No results were found for:          | dementia AND lesson* AND prevent* OR alzheimer AND lesson* AND prevent* OR cognitive impairment AND lesson* AND prevent*                                     |
| Search 6 | 45 records for 45 trials found for: | dementia AND training AND prevent* OR alzheimer AND training AND prevent* OR cognitive impairment AND training AND prevent*                                  |
| SUM      | <b>82</b>                           |                                                                                                                                                              |

**ICTRP (9 April 2018)**

|          |     |                                                                                                                                                              |
|----------|-----|--------------------------------------------------------------------------------------------------------------------------------------------------------------|
| Search 1 | 20  | dementia AND education* AND prevent* OR alzheimer AND education* AND prevent* OR cognitive impairment AND education* AND prevent*                            |
| Search 2 | 3   | dementia AND mental activ* AND prevent* OR alzheimer AND mental activ* AND prevent* OR cognitive impairment AND mental activ* AND prevent*                   |
| Search 3 | 5   | dementia AND cognitive stimulat* AND prevent* OR alzheimer AND cognitive stimulat* AND prevent* OR cognitive impairment AND cognitive stimulat* AND prevent* |
| Search 4 | 27  | dementia AND learning AND prevent* OR alzheimer AND learning AND prevent* OR cognitive impairment AND learning AND prevent*                                  |
| Search 5 | 1   | dementia AND lesson* AND prevent* OR alzheimer AND lesson* AND prevent* OR cognitive impairment AND lesson* AND prevent*                                     |
| Search 6 | 64  | dementia AND training AND prevent* OR alzheimer AND training AND prevent* OR cognitive impairment AND training AND prevent*                                  |
| SUM      | 120 |                                                                                                                                                              |

**ALOIS (15 May 2017)**

## ALOIS

---

|            |                                                        |
|------------|--------------------------------------------------------|
| Study Aim: | Cognitive Enhancement (healthy);<br>Primary Prevention |
|------------|--------------------------------------------------------|

---

|                    |                     |
|--------------------|---------------------|
| Intervention type: | Non-pharmacological |
|--------------------|---------------------|

---

|               |                   |                                   |
|---------------|-------------------|-----------------------------------|
| Intervention: | Contains any word | learning education<br>educational |
|---------------|-------------------|-----------------------------------|

---

---

**18** Studies found

**ALOIS (9 April 2018)**

Not searched website down

**DART-Europe (16 May 2017)**

| search                                                                                                                                                                | results |
|-----------------------------------------------------------------------------------------------------------------------------------------------------------------------|---------|
| (dementia OR alzheimer* OR "cognitive impairment") AND (education* OR "mental activity" OR "mental activities" OR "cognitive stimulation") AND (prevent* OR improve*) | 43      |

**DART-Europe (8 April 2018)**

| search                                                                                                                                                                | results |
|-----------------------------------------------------------------------------------------------------------------------------------------------------------------------|---------|
| (dementia OR alzheimer* OR "cognitive impairment") AND (education* OR "mental activity" OR "mental activities" OR "cognitive stimulation") AND (prevent* OR improve*) | 56      |
| YEAR: 2017                                                                                                                                                            | 4       |

## Supplementary file 4: Search Strategies of Overview of Systematic Reviews, by database

### Medline (via PubMed): 10 July 2017

| #  | Suchen                                                                                                                                                                                                                                                                                                                                                                                                                                                 | Ergebnisse |
|----|--------------------------------------------------------------------------------------------------------------------------------------------------------------------------------------------------------------------------------------------------------------------------------------------------------------------------------------------------------------------------------------------------------------------------------------------------------|------------|
| 1  | Dementia/ or exp Alzheimer Disease/                                                                                                                                                                                                                                                                                                                                                                                                                    | 117573     |
| 2  | Cognitive Dysfunction/                                                                                                                                                                                                                                                                                                                                                                                                                                 | 5969       |
| 3  | Cognition/                                                                                                                                                                                                                                                                                                                                                                                                                                             | 81563      |
| 4  | (dementia or alzheimer*).ti,ab.                                                                                                                                                                                                                                                                                                                                                                                                                        | 175194     |
| 5  | ((cognit* or memory or mental) adj3 (impair* or decline* or deficit* or reduc* or function*)).ti,ab.                                                                                                                                                                                                                                                                                                                                                   | 167110     |
| 6  | or/1-5                                                                                                                                                                                                                                                                                                                                                                                                                                                 | 371089     |
| 7  | exp Leisure Activities/                                                                                                                                                                                                                                                                                                                                                                                                                                | 209051     |
| 8  | leisure.ti,ab.                                                                                                                                                                                                                                                                                                                                                                                                                                         | 13073      |
| 9  | (hobby or hobbies).ti,ab.                                                                                                                                                                                                                                                                                                                                                                                                                              | 1465       |
| 10 | free time.ti,ab.                                                                                                                                                                                                                                                                                                                                                                                                                                       | 1405       |
| 11 | Recreation.ti,ab.                                                                                                                                                                                                                                                                                                                                                                                                                                      | 4826       |
| 12 | (in-door or out-door or indoor or outdoor).ti.                                                                                                                                                                                                                                                                                                                                                                                                         | 8929       |
| 13 | (garden* or horticultur*).ti.                                                                                                                                                                                                                                                                                                                                                                                                                          | 3216       |
| 14 | (play* or game? or gaming).ti.                                                                                                                                                                                                                                                                                                                                                                                                                         | 46562      |
| 15 | (creativ* or painting or drawing or reading).ti.                                                                                                                                                                                                                                                                                                                                                                                                       | 24387      |
| 16 | (voluntary or volunteer* or extracurricular).ti.                                                                                                                                                                                                                                                                                                                                                                                                       | 32266      |
| 17 | or/7-16                                                                                                                                                                                                                                                                                                                                                                                                                                                | 321695     |
| 18 | 6 and 17                                                                                                                                                                                                                                                                                                                                                                                                                                               | 9189       |
| 19 | exp age groups/ not (exp aged/ or middle aged/)                                                                                                                                                                                                                                                                                                                                                                                                        | 3712487    |
| 20 | 18 not 19                                                                                                                                                                                                                                                                                                                                                                                                                                              | 6496       |
| 21 | (systematic or structured or evidence or trials).ti. and ((review or overview or look or examination or update* or summary).ti. or review.pt.)                                                                                                                                                                                                                                                                                                         | 118333     |
| 22 | (0266-4623 or 1469-493X or 1366-5278 or 1530-440X).is.                                                                                                                                                                                                                                                                                                                                                                                                 | 15710      |
| 23 | meta-analysis.pt. or Network Meta-Analysis/ or (meta-analys* or meta analys* or metaanalys* or meta synth* or meta-synth* or metasynth*).tw,hw.                                                                                                                                                                                                                                                                                                        | 145368     |
| 24 | review.pt. and ((medline or medlars or embase or pubmed or scisearch or psychinfo or psycinfo or psychlit or psyclit or cinahl or electronic database* or bibliographic database* or computeri#ed database* or online database* or pooling or pooled or mantel haenszel or peto or dersimonian or der simonian or fixed effect or ((hand adj2 search*) or (manual* adj2 search*))).tw,hw. or (retraction of publication or retracted publication).pt.) | 117882     |
| 25 | ((systematic or meta) adj2 (analys* or review)).ti,kf. or ((systematic* or quantitativ* or methodologic*) adj5 (review* or overview*)).tw,hw. or (quantitativ\$ adj5 synthesis\$).tw,hw.                                                                                                                                                                                                                                                               | 171997     |



|    |    |                                                                        |        |
|----|----|------------------------------------------------------------------------|--------|
| 1  |    |                                                                        |        |
| 2  |    |                                                                        |        |
| 3  | 26 | (integrative research review* or research integration).tw. or scoping  | 167686 |
| 4  |    | review?.ti,kf. or (review.ti,kf,pt. and (trials as topic or studies as |        |
| 5  |    | topic).hw.) or (evidence adj3 review*).ti,ab,kf.                       |        |
| 6  |    |                                                                        |        |
| 7  | 27 | 21 or 22 or 23 or 24 or 25 or 26                                       | 412039 |
| 8  | 28 | 27 not (case report/ or letter.pt.)                                    | 401602 |
| 9  | 29 | 20 and 28                                                              | 243    |
| 10 | 30 | remove duplicates from 29                                              | 229    |
| 11 |    |                                                                        |        |
| 12 |    |                                                                        |        |
| 13 |    |                                                                        |        |
| 14 |    |                                                                        |        |
| 15 |    |                                                                        |        |
| 16 |    |                                                                        |        |
| 17 |    |                                                                        |        |
| 18 |    |                                                                        |        |
| 19 |    |                                                                        |        |
| 20 |    |                                                                        |        |
| 21 |    |                                                                        |        |
| 22 |    |                                                                        |        |
| 23 |    |                                                                        |        |
| 24 |    |                                                                        |        |
| 25 |    |                                                                        |        |
| 26 |    |                                                                        |        |
| 27 |    |                                                                        |        |
| 28 |    |                                                                        |        |
| 29 |    |                                                                        |        |
| 30 |    |                                                                        |        |
| 31 |    |                                                                        |        |
| 32 |    |                                                                        |        |
| 33 |    |                                                                        |        |
| 34 |    |                                                                        |        |
| 35 |    |                                                                        |        |
| 36 |    |                                                                        |        |
| 37 |    |                                                                        |        |
| 38 |    |                                                                        |        |
| 39 |    |                                                                        |        |
| 40 |    |                                                                        |        |
| 41 |    |                                                                        |        |
| 42 |    |                                                                        |        |
| 43 |    |                                                                        |        |
| 44 |    |                                                                        |        |
| 45 |    |                                                                        |        |
| 46 |    |                                                                        |        |
| 47 |    |                                                                        |        |
| 48 |    |                                                                        |        |
| 49 |    |                                                                        |        |
| 50 |    |                                                                        |        |
| 51 |    |                                                                        |        |
| 52 |    |                                                                        |        |
| 53 |    |                                                                        |        |
| 54 |    |                                                                        |        |
| 55 |    |                                                                        |        |
| 56 |    |                                                                        |        |
| 57 |    |                                                                        |        |
| 58 |    |                                                                        |        |
| 59 |    |                                                                        |        |
| 60 |    |                                                                        |        |

1  
2  
3  
4  
5  
6  
7  
8  
9  
10  
11  
12  
13  
14  
15  
16  
17  
18  
19  
20  
21  
22  
23  
24  
25  
26  
27  
28  
29  
30  
31  
32  
33  
34  
35  
36  
37  
38  
39  
40  
41  
42  
43  
44  
45  
46  
47  
48  
49  
50  
51  
52  
53  
54  
55  
56  
57  
58  
59  
60

### Medline (via PubMed): 4 April 2018

| #  | Searches                                                                                                                                                                                                                                                                                                                                                                                                                                               | Results |
|----|--------------------------------------------------------------------------------------------------------------------------------------------------------------------------------------------------------------------------------------------------------------------------------------------------------------------------------------------------------------------------------------------------------------------------------------------------------|---------|
| 1  | Dementia/ or exp Alzheimer Disease/                                                                                                                                                                                                                                                                                                                                                                                                                    | 118622  |
| 2  | Cognitive Dysfunction/                                                                                                                                                                                                                                                                                                                                                                                                                                 | 7904    |
| 3  | Cognition/                                                                                                                                                                                                                                                                                                                                                                                                                                             | 82628   |
| 4  | Cognitive Reserve/                                                                                                                                                                                                                                                                                                                                                                                                                                     | 388     |
| 5  | (dementia or alzheimer*).ti,ab.                                                                                                                                                                                                                                                                                                                                                                                                                        | 179042  |
| 6  | ((cognit* or memory or mental) adj3 (impair* or decline* or deficit* or reduc* or function*)).ti,ab.                                                                                                                                                                                                                                                                                                                                                   | 171766  |
| 7  | or/1-6                                                                                                                                                                                                                                                                                                                                                                                                                                                 | 378437  |
| 8  | exp Leisure Activities/                                                                                                                                                                                                                                                                                                                                                                                                                                | 207917  |
| 9  | leisure.ti,ab.                                                                                                                                                                                                                                                                                                                                                                                                                                         | 13201   |
| 10 | (hobby or hobbies).ti,ab.                                                                                                                                                                                                                                                                                                                                                                                                                              | 1472    |
| 11 | free time.ti,ab.                                                                                                                                                                                                                                                                                                                                                                                                                                       | 1429    |
| 12 | Recreation.ti,ab.                                                                                                                                                                                                                                                                                                                                                                                                                                      | 4900    |
| 13 | (in-door or out-door or indoor or outdoor).ti.                                                                                                                                                                                                                                                                                                                                                                                                         | 9232    |
| 14 | (garden* or horticultur*).ti.                                                                                                                                                                                                                                                                                                                                                                                                                          | 3312    |
| 15 | (play* or game? or gaming).ti.                                                                                                                                                                                                                                                                                                                                                                                                                         | 47658   |
| 16 | (creativ* or painting or drawing or reading).ti.                                                                                                                                                                                                                                                                                                                                                                                                       | 24235   |
| 17 | (voluntary or volunteer* or extracurricular).ti.                                                                                                                                                                                                                                                                                                                                                                                                       | 32218   |
| 18 | (cognitiv* adj2 (activity or activities)).ti.                                                                                                                                                                                                                                                                                                                                                                                                          | 521     |
| 19 | or/8-18                                                                                                                                                                                                                                                                                                                                                                                                                                                | 322366  |
| 20 | 7 and 19                                                                                                                                                                                                                                                                                                                                                                                                                                               | 9826    |
| 21 | exp age groups/ not (exp aged/ or middle aged/)                                                                                                                                                                                                                                                                                                                                                                                                        | 3685197 |
| 22 | 20 not 21                                                                                                                                                                                                                                                                                                                                                                                                                                              | 6996    |
| 23 | (systematic or structured or evidence or trials).ti. and ((review or overview or look or examination or update* or summary).ti. or review.pt.)                                                                                                                                                                                                                                                                                                         | 126873  |
| 24 | (0266-4623 or 1469-493X or 1366-5278 or 1530-440X).is.                                                                                                                                                                                                                                                                                                                                                                                                 | 15689   |
| 25 | meta-analysis.pt. or Network Meta-Analysis/ or (meta-analys* or meta analys* or metaanalys* or meta synth* or meta-synth* or metasynt*).tw,hw.                                                                                                                                                                                                                                                                                                         | 151505  |
| 26 | review.pt. and ((medline or medlars or embase or pubmed or scisearch or psychinfo or psycinfo or psychlit or psyclit or cinahl or electronic database* or bibliographic database* or computeri#ed database* or online database* or pooling or pooled or mantel haenszel or peto or dersimonian or der simonian or fixed effect or ((hand adj2 search*) or (manual* adj2 search*))).tw,hw. or (retraction of publication or retracted publication).pt.) | 125835  |
| 27 | ((systematic or meta) adj2 (analys* or review)).ti,kf. or ((systematic* or quantitativ* or methodologic*) adj5 (review* or overview*)).tw,hw. or (quantitativ\$ adj5 synthesis\$).tw,hw.                                                                                                                                                                                                                                                               | 184250  |

|    |                                                                                                                                                                                               |         |
|----|-----------------------------------------------------------------------------------------------------------------------------------------------------------------------------------------------|---------|
| 28 | (integrative research review* or research integration).tw. or scoping review?.ti,kf. or (review.ti,kf,pt. and (trials as topic or studies as topic).hw.) or (evidence adj3 review*).ti,ab,kf. | 168915  |
| 29 | 23 or 24 or 25 or 26 or 27 or 28                                                                                                                                                              | 425049  |
| 30 | 29 not (case report/ or letter.pt.)                                                                                                                                                           | 414173  |
| 31 | 22 and 30                                                                                                                                                                                     | 283     |
| 32 | ("2017/07*" or "2017/08*" or "2017/09*" or "2017/1*" or 2018*).dt.                                                                                                                            | 947449  |
| 33 | (201707* or 201708* or 201709* or 20171* or 2018*).ed.                                                                                                                                        | 745570  |
| 34 | 32 or 33                                                                                                                                                                                      | 1543513 |
| 35 | 31 and 34                                                                                                                                                                                     | 53      |
| 36 | remove duplicates from 35                                                                                                                                                                     | 52      |

## Embase: 17 Juli 2017

| No. | Query                                                                                                                                                                                 | Results |
|-----|---------------------------------------------------------------------------------------------------------------------------------------------------------------------------------------|---------|
| #1  | 'alzheimer disease'/exp                                                                                                                                                               | 158632  |
| #2  | 'mild cognitive impairment'/exp                                                                                                                                                       | 17483   |
| #3  | 'dementia'/de                                                                                                                                                                         | 98402   |
| #4  | dementia:ti,ab OR alzheimer*:ti,ab                                                                                                                                                    | 230453  |
| #5  | ((cognit* OR memory OR mental) NEAR/3 (impair* OR decline* OR deficit* OR reduc* OR function*)):ti,ab                                                                                 | 226651  |
| #6  | #1 OR #2 OR #3 OR #4 OR #5                                                                                                                                                            | 440912  |
| #7  | 'recreation'/exp                                                                                                                                                                      | 57806   |
| #8  | leisure:ti,ab                                                                                                                                                                         | 16016   |
| #9  | hobby:ti,ab OR hobbies:ti,ab                                                                                                                                                          | 2028    |
| #10 | 'free time':ti,ab                                                                                                                                                                     | 1939    |
| #11 | recreation:ti,ab                                                                                                                                                                      | 6442    |
| #12 | 'in door':ti OR 'out door':ti OR indoor:ti OR outdoor:ti                                                                                                                              | 11551   |
| #13 | garden*:ti OR horticultur*:ti                                                                                                                                                         | 3581    |
| #14 | play*:ti OR game:ti OR games:ti OR gaming:ti                                                                                                                                          | 52543   |
| #15 | creativ*:ti OR painting:ti OR drawing:ti OR reading:ti                                                                                                                                | 25887   |
| #16 | voluntary:ti OR volunteer*:ti OR extracurricular:ti                                                                                                                                   | 38793   |
| #17 | #7 OR #8 OR #9 OR #10 OR #11 OR #12 OR #13 OR #14 OR #15 OR #16                                                                                                                       | 196912  |
| #18 | #6 AND #17                                                                                                                                                                            | 5027    |
| #19 | 'groups by age'/exp AND ('middle aged'/exp OR 'aged'/exp)                                                                                                                             | 3258589 |
| #20 | #18 NOT #19                                                                                                                                                                           | 3277    |
| #21 | systematic review'/exp OR 'meta analysis'/exp                                                                                                                                         | 211886  |
| #22 | meta analys*:ti,ab OR metaanalys*:ti,ab OR 'meta synth*':ti,ab OR metasynt*:ti,ab OR ((systematic* OR quantitativ* OR methodologic*) NEAR/5 (review* OR overview* OR synthes*)):ti,ab | 239389  |
| #23 | systematic:ti OR structured:ti OR evidence:ti OR trials:ti AND (review:ti OR overview:ti OR look:ti OR examination:ti OR update*:ti OR summary:ti)                                    | 98173   |
| #24 | #21 OR #22 OR #23                                                                                                                                                                     | 306796  |
| #25 | #24 NOT ('case report'/exp OR 'case study'/exp)                                                                                                                                       | 301911  |
| #26 | #20 AND #25                                                                                                                                                                           | 128     |

## Embase: 4 April 2018

| No. | Query                                                                                                                                                                                     | Results |
|-----|-------------------------------------------------------------------------------------------------------------------------------------------------------------------------------------------|---------|
| #1  | 'alzheimer disease'/exp                                                                                                                                                                   | 167669  |
| #2  | 'mild cognitive impairment'/exp OR 'dementia'/de                                                                                                                                          | 115768  |
| #3  | 'cognitive reserve'/de                                                                                                                                                                    | 1341    |
| #4  | dementia:ti,ab OR alzheimer*:ti,ab                                                                                                                                                        | 245434  |
| #5  | ((cognit* OR memory OR mental) NEAR/3 (impair* OR decline* OR deficit* OR reduc* OR function*)):ti,ab                                                                                     | 244167  |
| #6  | #1 OR #2 OR #3 OR #4 OR #5                                                                                                                                                                | 470026  |
| #7  | 'recreation'/exp                                                                                                                                                                          | 61588   |
| #8  | leisure:ti,ab                                                                                                                                                                             | 16979   |
| #9  | hobby:ti,ab OR hobbies:ti,ab                                                                                                                                                              | 2145    |
| #10 | 'free time':ti,ab                                                                                                                                                                         | 2061    |
| #11 | recreation:ti,ab                                                                                                                                                                          | 6767    |
| #12 | 'in door':ti OR 'out door':ti OR indoor:ti OR outdoor:ti                                                                                                                                  | 12183   |
| #13 | garden*:ti OR horticultur*:ti                                                                                                                                                             | 3745    |
| #14 | play*:ti OR game:ti OR games:ti OR gaming:ti                                                                                                                                              | 55639   |
| #15 | creativ*:ti OR painting:ti OR drawing:ti OR reading:ti                                                                                                                                    | 26738   |
| #16 | voluntary:ti OR volunteer*:ti OR extracurricular:ti OR ((cognitiv* NEAR/2 (activity OR activities)):ti)                                                                                   | 39956   |
| #17 | #7 OR #8 OR #9 OR #10 OR #11 OR #12 OR #13 OR #14 OR #15 OR #16                                                                                                                           | 207154  |
| #18 | #6 AND #17                                                                                                                                                                                | 5442    |
| #19 | 'groups by age'/exp AND ('middle aged'/exp OR 'aged'/exp)                                                                                                                                 | 345120  |
|     |                                                                                                                                                                                           | 2       |
| #20 | #18 NOT #19                                                                                                                                                                               | 3533    |
| #21 | 'systematic review'/exp OR 'meta analysis'/exp                                                                                                                                            | 239710  |
| #22 | 'meta analys*':ti,ab OR metaanalys*:ti,ab OR 'meta synth*':ti,ab OR metasynt*:ti,ab OR (((systematic* OR quantitativ* OR methodologic*) NEAR/5 (review* OR overview* OR synthes*)):ti,ab) | 267896  |
| #23 | (systematic:ti OR structured:ti OR evidence:ti OR trials:ti) AND (review:ti OR overview:ti OR look:ti OR examination:ti OR update*:ti OR summary:ti)                                      | 112383  |
| #24 | #21 OR #22 OR #23                                                                                                                                                                         | 342728  |
| #25 | #24 NOT ('case report'/exp OR 'case study'/exp)                                                                                                                                           | 337160  |
| #26 | #20 AND #25                                                                                                                                                                               | 145     |
| #27 | #26 AND [1-7-2017]/sd NOT [5-4-2018]/sd                                                                                                                                                   | 26      |
| #28 | #26 AND [2017-2018]/py                                                                                                                                                                    | 30      |
| #29 | #27 OR #28                                                                                                                                                                                | 35      |

**CINAHL (Ebsco): 17 July 2017**

| #   | Query                                                                                                                                                                                                  | Limiters/Expanders                      | Results |
|-----|--------------------------------------------------------------------------------------------------------------------------------------------------------------------------------------------------------|-----------------------------------------|---------|
| S1  | (MH "Alzheimer's Disease") OR (MH "Dementia")                                                                                                                                                          | Search modes - Find all my search terms | 38,358  |
| S2  | dementia OR alzheimer*                                                                                                                                                                                 | Search modes - Find all my search terms | 47,332  |
| S3  | ((cognit* OR memory OR mental) N3 (impair* OR decline* OR deficit* OR reduc* OR function*))                                                                                                            | Search modes - Find all my search terms | 30,037  |
| S4  | S1 OR S2 OR S3                                                                                                                                                                                         | Search modes - Find all my search terms | 68,971  |
| S5  | (MH "Leisure Activities+")                                                                                                                                                                             | Search modes - Find all my search terms | 36,998  |
| S6  | leisure OR hobby OR hobbies OR "free time" OR Recreation                                                                                                                                               | Search modes - Find all my search terms | 11,096  |
| S7  | TI in-door OR out-door OR indoor OR outdoor OR garden* OR horticultur* OR play* OR game OR games OR gaming OR creativ* OR painting OR drawing OR reading OR voluntary OR volunteer* OR extracurricular | Search modes - Find all my search terms | 31,628  |
| S8  | S5 OR S6 OR S7                                                                                                                                                                                         | Search modes - Find all my search terms | 69,497  |
| S9  | S4 AND S8                                                                                                                                                                                              | Search modes - Find all my search terms | 2,053   |
| S10 | MH "Animal Studies"                                                                                                                                                                                    | Search modes - Find all my search terms | 41,599  |
| S11 | S9 NOT S10                                                                                                                                                                                             | Search modes - Find all my search terms | 2,051   |
| S12 | MH "Named Groups by Age+" NOT (MH "Middle Age" OR MH "Aged+")                                                                                                                                          | Search modes - Find all my search terms | 564,745 |
| S13 | S11 NOT S12                                                                                                                                                                                            | Search modes - Find all my search terms | 1,855   |
| S14 | (MH "Systematic Review") OR (MH "Meta Analysis")                                                                                                                                                       | Search modes - Find all my search terms | 42,089  |
| S15 | meta-analys* OR meta analys* OR metaanalys* OR meta synth* OR meta-synth* OR metasynth*                                                                                                                | Search modes - Boolean/Phrase           | 31,338  |
| S16 | (systematic* OR quantitativ* OR methodologic*) N4 (review* OR overview* OR synthes*)                                                                                                                   | Search modes - Boolean/Phrase           | 55,272  |
| S17 | TI (systematic OR structured OR evidence OR trials) AND (review OR overview OR look OR examination OR update* OR summary)                                                                              | Search modes - Boolean/Phrase           | 27,392  |
| S18 | S14 OR S15 OR S16 OR S17                                                                                                                                                                               | Search modes - Find all my search terms | 72,333  |
| S19 | S13 AND S18                                                                                                                                                                                            | Search modes - Find all my search terms | 71      |

**CINAHL (Ebsco): 4 April 2018**

| #   | Query                                                                                                                                                                                                                                                                               | Limiters/Expanders                      | Results |
|-----|-------------------------------------------------------------------------------------------------------------------------------------------------------------------------------------------------------------------------------------------------------------------------------------|-----------------------------------------|---------|
| S1  | (MH "Alzheimer's Disease")<br>OR (MH "Dementia")                                                                                                                                                                                                                                    | Search modes - Find all my search terms | 40,163  |
| S2  | dementia OR alzheimer*                                                                                                                                                                                                                                                              | Search modes - Find all my search terms | 50,045  |
| S3  | ((cognit* OR memory OR<br>mental) N3 (impair* OR<br>decline* OR deficit* OR<br>reduc* OR function*))                                                                                                                                                                                | Search modes - Find all my search terms | 32,819  |
| S4  | S1 OR S2 OR S3                                                                                                                                                                                                                                                                      | Search modes - Find all my search terms | 73,730  |
| S5  | (MH "Leisure Activities+")                                                                                                                                                                                                                                                          | Search modes - Find all my search terms | 39,894  |
| S6  | leisure OR hobby OR hobbies<br>OR "free time" OR<br>Recreation                                                                                                                                                                                                                      | Search modes - Find all my search terms | 11,740  |
| S7  | TI (in-door OR out-door OR<br>indoor OR outdoor OR<br>garden* OR horticultur* OR<br>play* OR game OR games OR<br>gaming OR creativ* OR<br>painting OR drawing OR<br>reading OR oluntary OR<br>volunteer* OR<br>extracurricular) OR TI<br>(cognitiv* W1 (activity OR<br>activities)) | Search modes - Find all my search terms | 33,266  |
| S8  | S5 OR S6 OR S7                                                                                                                                                                                                                                                                      | Search modes - Find all my search terms | 73,940  |
| S9  | S4 AND S8                                                                                                                                                                                                                                                                           | Search modes - Find all my search terms | 2,298   |
| S10 | MH "Animal Studies"                                                                                                                                                                                                                                                                 | Search modes - Find all my search terms | 43,752  |
| S11 | S9 NOT S10                                                                                                                                                                                                                                                                          | Search modes - Find all my search terms | 2,295   |
| S12 | MH "Named Groups by<br>Age+" NOT (MH "Middle<br>Age" OR MH "Aged+")                                                                                                                                                                                                                 | Search modes - Find all my search terms | 594,058 |
| S13 | S11 NOT S12                                                                                                                                                                                                                                                                         | Search modes - Find all my search terms | 2,079   |
| S14 | (MH "Systematic Review")<br>OR (MH "Meta Analysis")                                                                                                                                                                                                                                 | Search modes - Find all my search terms | 50,503  |
| S15 | meta-analys* OR meta<br>analys* OR metaanalys* OR                                                                                                                                                                                                                                   | Search modes - Boolean/Phrase           | 34,556  |

|     |                                                                                                                                       |                                                                                 |         |
|-----|---------------------------------------------------------------------------------------------------------------------------------------|---------------------------------------------------------------------------------|---------|
|     | meta synth* OR meta-synth*<br>OR metasynt*                                                                                            |                                                                                 |         |
| S16 | (systematic* OR quantitativ*<br>OR methodologic*) N4<br>(review* OR overview* OR<br>synthes*)                                         | Search modes - Boolean/Phrase                                                   | 63,373  |
| S17 | TI (systematic OR structured<br>OR evidence OR trials) AND<br>(review OR overview OR look<br>OR examination OR update*<br>OR summary) | Search modes - Boolean/Phrase                                                   | 30,586  |
| S18 | S14 OR S15 OR S16 OR S17                                                                                                              | Search modes - Find all my search terms                                         | 81,245  |
| S19 | S13 AND S18                                                                                                                           | Search modes - Find all my search terms                                         | 93      |
| S20 |                                                                                                                                       | Limiters - Published Date: 20170701-<br>Search modes - Find all my search terms | 156,794 |
| S21 | EM 20170701-                                                                                                                          | Search modes - Find all my search terms                                         | 208,855 |
| S22 | S20 OR S21                                                                                                                            | Search modes - Find all my search terms                                         | 253,372 |
| S23 | S22 AND S19                                                                                                                           | Search modes - Find all my search terms                                         | 27      |



1  
2  
3  
4  
5  
6  
7  
8  
9  
10  
11  
12  
13  
14  
15  
16  
17  
18  
19  
20  
21  
22  
23  
24  
25  
26  
27  
28  
29  
30  
31  
32  
33  
34  
35  
36  
37  
38  
39  
40  
41  
42  
43  
44  
45  
46  
47  
48  
49  
50  
51  
52  
53  
54  
55  
56  
57  
58  
59  
60

### PsycINFO (Ebsco): 18 July 2017

| #   | Query                                                                                                                                                                                                                                                                                                                                                                                                                | Limiters/Expanders                      | Results   |
|-----|----------------------------------------------------------------------------------------------------------------------------------------------------------------------------------------------------------------------------------------------------------------------------------------------------------------------------------------------------------------------------------------------------------------------|-----------------------------------------|-----------|
| S1  | DE "Alzheimer's Disease"                                                                                                                                                                                                                                                                                                                                                                                             | Search modes - Find all my search terms | 39,908    |
| S2  | DE "Senile Dementia"                                                                                                                                                                                                                                                                                                                                                                                                 | Search modes - Find all my search terms | 1,063     |
| S3  | DE "Cognitive Impairment"                                                                                                                                                                                                                                                                                                                                                                                            | Search modes - Find all my search terms | 30,416    |
| S4  | dementia OR alzheimer*                                                                                                                                                                                                                                                                                                                                                                                               | Search modes - Find all my search terms | 94,008    |
| S5  | ((cognit* OR memory OR mental) N3 (impair* OR decline* OR deficit* OR reduc* OR function*))                                                                                                                                                                                                                                                                                                                          | Search modes - Find all my search terms | 138,651   |
| S6  | S1 OR S2 OR S3 OR S4 OR S5                                                                                                                                                                                                                                                                                                                                                                                           | Search modes - Find all my search terms | 200,033   |
| S7  | (((((DE "Leisure Time") OR (DE "Hobbies")) AND (DE "Recreation" OR DE "Clubs (Social Organizations)" OR DE "Traveling" OR DE "Vacationing"))) OR (DE "Gambling")) AND (DE "Games" OR DE "Chess" OR DE "Computer Games"))                                                                                                                                                                                             | Search modes - Find all my search terms | 347       |
| S8  | leisure OR hobby OR hobbies OR "free time" OR Recreation                                                                                                                                                                                                                                                                                                                                                             | Search modes - Find all my search terms | 37,212    |
| S9  | TI (in-door OR out-door OR indoor OR outdoor OR garden* OR horticultur* OR play* OR game OR games OR gaming OR creativ* OR painting OR drawing OR reading OR voluntary OR volunteer* OR extracurricular) OR SU (in-door OR out-door OR indoor OR outdoor OR garden* OR horticultur* OR play* OR game OR games OR gaming OR creativ* OR painting OR drawing OR reading OR voluntary OR volunteer* OR extracurricular) | Search modes - Find all my search terms | 175,457   |
| S10 | S7 OR S8 OR S9                                                                                                                                                                                                                                                                                                                                                                                                       | Search modes - Find all my search terms | 207,264   |
| S11 | S6 AND S10                                                                                                                                                                                                                                                                                                                                                                                                           | Search modes - Find all my search terms | 5,662     |
| S12 | (ZG "adolescence (13-17 yrs)" or ZG "adulthood (18 yrs & older)" or ZG "childhood (birth-12 yrs)") not (ZG "aged (65 yrs & older)" or ZG "middle age (40-64 yrs)")                                                                                                                                                                                                                                                   | Search modes - Find all my search terms | 1,627,211 |
| S13 | S11 NOT S12                                                                                                                                                                                                                                                                                                                                                                                                          | Search modes - Find all my search terms | 3,357     |
| S14 | (DE "Animals") OR TI (rat OR rats OR mouse OR mice OR dog OR dogs) OR SU (rat OR rats OR mouse OR mice OR dog OR dogs)                                                                                                                                                                                                                                                                                               | Search modes - Find all my search terms | 311,593   |
| S15 | S13 NOT S14                                                                                                                                                                                                                                                                                                                                                                                                          | Search modes - Find all my search terms | 3,212     |

|    |     |                                                                                                                                    |                                            |
|----|-----|------------------------------------------------------------------------------------------------------------------------------------|--------------------------------------------|
| 1  |     |                                                                                                                                    |                                            |
| 2  |     |                                                                                                                                    |                                            |
| 3  | S16 | (DE "Drug Therapy")                                                                                                                | Search modes - Find<br>all my search terms |
| 4  |     |                                                                                                                                    | 127,11                                     |
| 5  | S17 | S15 NOT S16                                                                                                                        | Search modes - Find<br>all my search terms |
| 6  |     |                                                                                                                                    | 3,161                                      |
| 7  | S18 | DE "Meta Analysis"                                                                                                                 | Search modes - Find<br>all my search terms |
| 8  |     |                                                                                                                                    | 4,026                                      |
| 9  | S19 | meta-analys* OR meta analys* OR metaanalys* OR<br>meta synth* OR meta-synth* OR metasynt*                                          | Search modes -<br>Boolean/Phrase           |
| 10 |     |                                                                                                                                    | 27,695                                     |
| 11 | S20 | (systematic* OR quantitativ* OR methodologic*)<br>N4 (review* OR overview* OR synthes*)                                            | Search modes - Find<br>all my search terms |
| 12 |     |                                                                                                                                    | 27,454                                     |
| 13 | S21 | TI (systematic OR structured OR evidence OR trials)<br>AND TI (review OR overview OR look OR<br>examination OR update* OR summary) | Search modes - Find<br>all my search terms |
| 14 |     |                                                                                                                                    | 16,949                                     |
| 15 | S22 | S18 OR S19 OR S20 OR S21                                                                                                           | Search modes - Find<br>all my search terms |
| 16 |     |                                                                                                                                    | 51,681                                     |
| 17 | S23 | S17 AND S22                                                                                                                        | Search modes - Find<br>all my search terms |
| 18 |     |                                                                                                                                    | 73                                         |
| 19 |     |                                                                                                                                    |                                            |
| 20 |     |                                                                                                                                    |                                            |
| 21 |     |                                                                                                                                    |                                            |
| 22 |     |                                                                                                                                    |                                            |
| 23 |     |                                                                                                                                    |                                            |
| 24 |     |                                                                                                                                    |                                            |
| 25 |     |                                                                                                                                    |                                            |
| 26 |     |                                                                                                                                    |                                            |
| 27 |     |                                                                                                                                    |                                            |
| 28 |     |                                                                                                                                    |                                            |
| 29 |     |                                                                                                                                    |                                            |
| 30 |     |                                                                                                                                    |                                            |
| 31 |     |                                                                                                                                    |                                            |
| 32 |     |                                                                                                                                    |                                            |
| 33 |     |                                                                                                                                    |                                            |
| 34 |     |                                                                                                                                    |                                            |
| 35 |     |                                                                                                                                    |                                            |
| 36 |     |                                                                                                                                    |                                            |
| 37 |     |                                                                                                                                    |                                            |
| 38 |     |                                                                                                                                    |                                            |
| 39 |     |                                                                                                                                    |                                            |
| 40 |     |                                                                                                                                    |                                            |
| 41 |     |                                                                                                                                    |                                            |
| 42 |     |                                                                                                                                    |                                            |
| 43 |     |                                                                                                                                    |                                            |
| 44 |     |                                                                                                                                    |                                            |
| 45 |     |                                                                                                                                    |                                            |
| 46 |     |                                                                                                                                    |                                            |
| 47 |     |                                                                                                                                    |                                            |
| 48 |     |                                                                                                                                    |                                            |
| 49 |     |                                                                                                                                    |                                            |
| 50 |     |                                                                                                                                    |                                            |
| 51 |     |                                                                                                                                    |                                            |
| 52 |     |                                                                                                                                    |                                            |
| 53 |     |                                                                                                                                    |                                            |
| 54 |     |                                                                                                                                    |                                            |
| 55 |     |                                                                                                                                    |                                            |
| 56 |     |                                                                                                                                    |                                            |
| 57 |     |                                                                                                                                    |                                            |
| 58 |     |                                                                                                                                    |                                            |
| 59 |     |                                                                                                                                    |                                            |
| 60 |     |                                                                                                                                    |                                            |

1  
2  
3  
4  
5  
6  
7  
8  
9  
10  
11  
12  
13  
14  
15  
16  
17  
18  
19  
20  
21  
22  
23  
24  
25  
26  
27  
28  
29  
30  
31  
32  
33  
34  
35  
36  
37  
38  
39  
40  
41  
42  
43  
44  
45  
46  
47  
48  
49  
50  
51  
52  
53  
54  
55  
56  
57  
58  
59  
60

### PsycINFO (Ebsco): 5 April 2018

| #   | Query                                                                                                                                                                                                                                                                                                                                                                                                                                                                      | Limiters/Expanders                      | Results   |
|-----|----------------------------------------------------------------------------------------------------------------------------------------------------------------------------------------------------------------------------------------------------------------------------------------------------------------------------------------------------------------------------------------------------------------------------------------------------------------------------|-----------------------------------------|-----------|
| S1  | DE "Alzheimer's Disease"                                                                                                                                                                                                                                                                                                                                                                                                                                                   | Search modes - Find all my search terms | 41,959    |
| S2  | DE "Senile Dementia" OR DE "Cognitive Impairment"                                                                                                                                                                                                                                                                                                                                                                                                                          | Search modes - Find all my search terms | 33,077    |
| S3  | DE "Cognitive Reserve"                                                                                                                                                                                                                                                                                                                                                                                                                                                     | Search modes - Find all my search terms | 353       |
| S4  | dementia OR alzheimer*                                                                                                                                                                                                                                                                                                                                                                                                                                                     | Search modes - Find all my search terms | 98,945    |
| S5  | ((cognit* OR memory OR mental) N3 (impair* OR decline* OR deficit* OR reduc* OR function*))                                                                                                                                                                                                                                                                                                                                                                                | Search modes - Find all my search terms | 146,379   |
| S6  | S1 OR S2 OR S3 OR S4 OR S5                                                                                                                                                                                                                                                                                                                                                                                                                                                 | Search modes - Find all my search terms | 210,573   |
| S7  | (((((DE "Leisure Time") OR (DE "Hobbies")) AND (DE "Recreation" OR DE "Clubs (Social Organizations)" OR DE "Traveling" OR DE "Vacationing"))) OR (DE "Gambling"))) AND (DE "Games" OR DE "Chess" OR DE "Computer Games"))                                                                                                                                                                                                                                                  | Search modes - Find all my search terms | 358       |
| S8  | leisure OR hobby OR hobbies OR "free time" OR Recreation                                                                                                                                                                                                                                                                                                                                                                                                                   | Search modes - Find all my search terms | 39,017    |
| S9  | TI (in-door OR out-door OR indoor OR outdoor OR garden* OR horticultur* OR play* OR game OR games OR gaming OR creativ* OR painting OR drawing OR reading OR voluntary OR volunteer* OR extracurricular OR (cognitiv* W1 activit*)) OR SU (in-door OR out-door OR indoor OR outdoor OR garden* OR horticultur* OR play* OR game OR games OR gaming OR creativ* OR painting OR drawing OR reading OR voluntary OR volunteer* OR extracurricular OR (cognitiv* W1 activit*)) | Search modes - Find all my search terms | 182,299   |
| S10 | S7 OR S8 OR S9                                                                                                                                                                                                                                                                                                                                                                                                                                                             | Search modes - Find all my search terms | 215,667   |
| S11 | S6 AND S10                                                                                                                                                                                                                                                                                                                                                                                                                                                                 | Search modes - Find all my search terms | 6,166     |
| S12 | (ZG "adolescence (13-17 yrs)" or ZG "adulthood (18 yrs & older)" or ZG "childhood (birth-12 yrs)") not (ZG "aged (65 yrs & older)" or ZG "middle age (40-64 yrs)")                                                                                                                                                                                                                                                                                                         | Search modes - Find all my search terms | 1,695,146 |

|    |     |                                                                                                                              |                                         |         |
|----|-----|------------------------------------------------------------------------------------------------------------------------------|-----------------------------------------|---------|
| 1  |     |                                                                                                                              |                                         |         |
| 2  |     |                                                                                                                              |                                         |         |
| 3  | S13 | S11 NOT S12                                                                                                                  | Search modes - Find all my search terms | 3,706   |
| 4  |     |                                                                                                                              |                                         |         |
| 5  | S14 | (DE "Animals") OR TI (rat OR rats OR mouse OR mice OR dog OR dogs) OR SU (rat OR rats OR mouse OR mice OR dog OR dogs)       | Search modes - Find all my search terms | 318,343 |
| 6  |     |                                                                                                                              |                                         |         |
| 7  |     |                                                                                                                              |                                         |         |
| 8  |     |                                                                                                                              |                                         |         |
| 9  |     |                                                                                                                              |                                         |         |
| 10 | S15 | S13 NOT S14                                                                                                                  | Search modes - Find all my search terms | 3,539   |
| 11 |     |                                                                                                                              |                                         |         |
| 12 | S16 | (DE "Drug Therapy")                                                                                                          | Search modes - Find all my search terms | 129,812 |
| 13 |     |                                                                                                                              |                                         |         |
| 14 |     |                                                                                                                              |                                         |         |
| 15 | S17 | S15 NOT S16                                                                                                                  | Search modes - Find all my search terms | 3,481   |
| 16 |     |                                                                                                                              |                                         |         |
| 17 | S18 | DE "Meta Analysis"                                                                                                           | Search modes - Find all my search terms | 4,152   |
| 18 |     |                                                                                                                              |                                         |         |
| 19 | S19 | meta-analys* OR meta analys* OR metaanalys* OR meta synth* OR meta-synth* OR metasynth*                                      | Search modes - Boolean/Phrase           | 30,127  |
| 20 |     |                                                                                                                              |                                         |         |
| 21 |     |                                                                                                                              |                                         |         |
| 22 |     |                                                                                                                              |                                         |         |
| 23 | S20 | (systematic* OR quantitativ* OR methodologic*) N4 (review* OR overview* OR synthes*)                                         | Search modes - Find all my search terms | 30,748  |
| 24 |     |                                                                                                                              |                                         |         |
| 25 |     |                                                                                                                              |                                         |         |
| 26 | S21 | TI (systematic OR structured OR evidence OR trials) AND TI (review OR overview OR look OR examination OR update* OR summary) | Search modes - Find all my search terms | 19,166  |
| 27 |     |                                                                                                                              |                                         |         |
| 28 |     |                                                                                                                              |                                         |         |
| 29 |     |                                                                                                                              |                                         |         |
| 30 |     |                                                                                                                              |                                         |         |
| 31 | S22 | S18 OR S19 OR S20 OR S21                                                                                                     | Search modes - Find all my search terms | 56,448  |
| 32 |     |                                                                                                                              |                                         |         |
| 33 | S23 | S17 AND S22                                                                                                                  | Search modes - Find all my search terms | 84      |
| 34 |     |                                                                                                                              |                                         |         |
| 35 | S24 | RD 201707-                                                                                                                   | Search modes - Find all my search terms | 148,956 |
| 36 |     |                                                                                                                              |                                         |         |
| 37 |     |                                                                                                                              |                                         |         |
| 38 | S25 | DT 201707-                                                                                                                   | Search modes - Find all my search terms | 100,982 |
| 39 |     |                                                                                                                              |                                         |         |
| 40 | S26 | S24 OR S25                                                                                                                   | Search modes - Find all my search terms | 159,715 |
| 41 |     |                                                                                                                              |                                         |         |
| 42 |     |                                                                                                                              |                                         |         |
| 43 | S27 | S23 AND S26                                                                                                                  | Search modes - Find all my search terms | 13      |
| 44 |     |                                                                                                                              |                                         |         |
| 45 |     |                                                                                                                              |                                         |         |
| 46 |     |                                                                                                                              |                                         |         |
| 47 |     |                                                                                                                              |                                         |         |
| 48 |     |                                                                                                                              |                                         |         |
| 49 |     |                                                                                                                              |                                         |         |
| 50 |     |                                                                                                                              |                                         |         |
| 51 |     |                                                                                                                              |                                         |         |
| 52 |     |                                                                                                                              |                                         |         |
| 53 |     |                                                                                                                              |                                         |         |
| 54 |     |                                                                                                                              |                                         |         |
| 55 |     |                                                                                                                              |                                         |         |
| 56 |     |                                                                                                                              |                                         |         |
| 57 |     |                                                                                                                              |                                         |         |
| 58 |     |                                                                                                                              |                                         |         |
| 59 |     |                                                                                                                              |                                         |         |
| 60 |     |                                                                                                                              |                                         |         |

### Epistemonikos 18. Juli 2017

| Search                                                                                                                                                                                                                                                                                                                | Results |
|-----------------------------------------------------------------------------------------------------------------------------------------------------------------------------------------------------------------------------------------------------------------------------------------------------------------------|---------|
| (dementia OR alzheimer* OR cognitiv*) AND (leisure OR recreation OR "free time" OR hobby OR hobbies OR (title:(in-door OR out-door OR indoor OR outdoor OR garden* OR horticultur* OR play* OR game OR games OR gaming OR creativ* OR painting OR drawing OR reading OR voluntary OR volunteer* OR extracurricular))) | 273     |
| Filter: Systematic Review                                                                                                                                                                                                                                                                                             | 64      |

### Epistemonikos 18. Juli 2017

| Search                                                                                                                                                                                                                                                                                                                | Results |
|-----------------------------------------------------------------------------------------------------------------------------------------------------------------------------------------------------------------------------------------------------------------------------------------------------------------------|---------|
| (dementia OR alzheimer* OR cognitiv*) AND (leisure OR recreation OR "free time" OR hobby OR hobbies OR (title:(in-door OR out-door OR indoor OR outdoor OR garden* OR horticultur* OR play* OR game OR games OR gaming OR creativ* OR painting OR drawing OR reading OR voluntary OR volunteer* OR extracurricular))) | 368     |
| Filter: Systematic Review                                                                                                                                                                                                                                                                                             | 146     |
| Added to database: 01-07-17 to 05-04-18                                                                                                                                                                                                                                                                               | 25      |

**Cochrane Library: 18. Juli 2017**

| ID  | Search                                                                                                                  | Hits   |
|-----|-------------------------------------------------------------------------------------------------------------------------|--------|
| #1  | [mh ^Dementia] or [mh "Alzheimer Disease"]                                                                              | 4053   |
| #2  | [mh ^"Cognitive Dysfunction"]                                                                                           | 181    |
| #3  | [mh ^Cognition]                                                                                                         | 6276   |
| #4  | (dementia or alzheimer*):ti,ab,kw                                                                                       | 11879  |
| #5  | ((cognit* or memory or mental) next (impair* or decline* or deficit* or reduc* or function*)):ti,ab,kw                  | 12722  |
| #6  | {or #1-#5}                                                                                                              | 25014  |
| #7  | [mh "Leisure Activities"]                                                                                               | 15395  |
| #8  | leisure:ti,ab,kw                                                                                                        | 1481   |
| #9  | (hobby or hobbies):ti,ab,kw                                                                                             | 55     |
| #10 | "free time":ti,ab,kw                                                                                                    | 162    |
| #11 | Recreation:ti,ab,kw                                                                                                     | 615    |
| #12 | (in-door or out-door or indoor or outdoor):ti,kw                                                                        | 478    |
| #13 | (garden* or horticultur*):ti,kw                                                                                         | 106    |
| #14 | (play* or game* or gaming):ti,kw                                                                                        | 3280   |
| #15 | (creativ* or painting or drawing or reading):ti,kw                                                                      | 2913   |
| #16 | (voluntary or volunteer* or extracurricular):ti,kw                                                                      | 17942  |
| #17 | {or #7-#16}                                                                                                             | 39978  |
| #18 | #6 and #17                                                                                                              | 1551   |
| #19 | [mh "age groups"] not ([mh aged] or [mh "middle aged"])                                                                 | 104634 |
| #20 | #18 not #19 in Cochrane Reviews (Reviews and Protocols), Other Reviews, Technology Assessments and Economic Evaluations | 38     |

**Cochrane Library: 5. April 2018**

| ID  | Search                                                                                                 | Hits  |
|-----|--------------------------------------------------------------------------------------------------------|-------|
| #1  | [mh ^Dementia] or [mh "Alzheimer Disease"]                                                             | 4263  |
| #2  | [mh ^"Cognitive Dysfunction"]                                                                          | 450   |
| #3  | [mh ^Cognition]                                                                                        | 6675  |
| #4  | [mh ^"Cognitive Reserve"]                                                                              | 8     |
| #5  | (dementia or alzheimer*):ti,ab,kw                                                                      | 13099 |
| #6  | ((cognit* or memory or mental) next (impair* or decline* or deficit* or reduc* or function*)):ti,ab,kw | 14315 |
| #7  | {or #1-#6}                                                                                             | 27581 |
| #8  | [mh "Leisure Activities"]                                                                              | 16504 |
| #9  | leisure:ti,ab,kw                                                                                       | 1683  |
| #10 | (hobby or hobbies):ti,ab,kw                                                                            | 59    |
| #11 | free time:ti,ab,kw                                                                                     | 169   |
| #12 | Recreation:ti,ab,kw                                                                                    | 674   |
| #13 | (in-door or out-door or indoor or outdoor):ti,kw                                                       | 541   |

|    |                                                                         |        |
|----|-------------------------------------------------------------------------|--------|
| 1  |                                                                         |        |
| 2  |                                                                         |        |
| 3  | #14 (garden* or horticultur*):ti,kw                                     | 125    |
| 4  | #15 (play* or game* or gaming):ti,kw                                    | 3653   |
| 5  | #16 (creativ* or painting or drawing or reading):ti,kw                  | 3482   |
| 6  | #17 (voluntary or volunteer* or extracurricular):ti,kw                  | 20037  |
| 7  | #18 (cognitiv* near/2 (activity or activities)):ti,kw                   | 80     |
| 8  | #19 {or #8-#18}                                                         | 44252  |
| 9  | #20 #7 and #19                                                          | 1838   |
| 10 | #21 [mh "age groups"] not ([mh aged] or [mh "middle aged"])             | 109483 |
| 11 | #22 #20 not #21 Publication Year from 2017 to 2018, in Cochrane Reviews | 1      |
| 12 | (Reviews and Protocols) and Technology Assessments                      |        |
| 13 |                                                                         |        |
| 14 |                                                                         |        |
| 15 |                                                                         |        |
| 16 |                                                                         |        |
| 17 |                                                                         |        |
| 18 |                                                                         |        |
| 19 |                                                                         |        |
| 20 |                                                                         |        |
| 21 |                                                                         |        |
| 22 |                                                                         |        |
| 23 |                                                                         |        |
| 24 |                                                                         |        |
| 25 |                                                                         |        |
| 26 |                                                                         |        |
| 27 |                                                                         |        |
| 28 |                                                                         |        |
| 29 |                                                                         |        |
| 30 |                                                                         |        |
| 31 |                                                                         |        |
| 32 |                                                                         |        |
| 33 |                                                                         |        |
| 34 |                                                                         |        |
| 35 |                                                                         |        |
| 36 |                                                                         |        |
| 37 |                                                                         |        |
| 38 |                                                                         |        |
| 39 |                                                                         |        |
| 40 |                                                                         |        |
| 41 |                                                                         |        |
| 42 |                                                                         |        |
| 43 |                                                                         |        |
| 44 |                                                                         |        |
| 45 |                                                                         |        |
| 46 |                                                                         |        |
| 47 |                                                                         |        |
| 48 |                                                                         |        |
| 49 |                                                                         |        |
| 50 |                                                                         |        |
| 51 |                                                                         |        |
| 52 |                                                                         |        |
| 53 |                                                                         |        |
| 54 |                                                                         |        |
| 55 |                                                                         |        |
| 56 |                                                                         |        |
| 57 |                                                                         |        |
| 58 |                                                                         |        |
| 59 |                                                                         |        |
| 60 |                                                                         |        |

## Supplementary file 5: Risk of Bias of included studies

## Systematic reviews

| Author, Year                         | RISK OF BIAS | Dual Screening and Extraction | Comprehensive literature search | Study quality assessed | 'A priori' design | Grey literature included | List of studies | Study characteristics provided | Scientific quality used appropriately | Appropriate methods to combine findings | Publication bias     | Conflict of interest included | Reason for High Risk of Bias Decision                                                |
|--------------------------------------|--------------|-------------------------------|---------------------------------|------------------------|-------------------|--------------------------|-----------------|--------------------------------|---------------------------------------|-----------------------------------------|----------------------|-------------------------------|--------------------------------------------------------------------------------------|
| Di Marco et al., 2014 <sup>41</sup>  | High         | NR                            | Yes                             | No                     | Yes               | No                       | No              | No                             | NA                                    | Yes                                     | No                   | No                            | No information on screening methods or dual extraction<br>No risk of bias assessment |
| Opdebeeck et al., 2016 <sup>42</sup> | High         | Yes                           | Yes                             | No                     | Yes               | Yes                      | No              | Yes                            | NA                                    | Yes                                     | No                   | No                            | No risk of bias assessment<br>No assessment of Publication bias                      |
| Sajeev et al., 2016 <sup>43</sup>    | Medium       | NR                            | Yes                             | Yes                    | Yes               | No                       | No              | Yes                            | Yes                                   | Yes                                     | No                   | Yes                           | No information on dual screening or dual extraction                                  |
| Toril et al., 2014 <sup>44</sup>     | High         | NR                            | Yes                             | No                     | Yes               | No                       | No              | Yes                            | NA                                    | Yes                                     | Yes                  | No                            | No information on screening methods or dual extraction<br>No risk of bias assessment |
| Yates et al., 2016 <sup>45</sup>     | Medium       | NR                            | Yes                             | Yes                    | Yes               | No                       | No              | Yes                            | Yes                                   | Yes                                     | No (too few studies) | Yes                           | No information on dual screening or dual extraction                                  |

NA = not applicable, NR = not reported



## Supplementary file 6: List of excluded studies during full text screening

## Systematic review:

| Study                       | Title                                                                                                                                                                                                  | Reason for Exclusion        |
|-----------------------------|--------------------------------------------------------------------------------------------------------------------------------------------------------------------------------------------------------|-----------------------------|
| Canadian Nursing Home, 2007 | Studies confirm link between late-life cognitive activities and reduced risk of dementia                                                                                                               | Not retrievable             |
| Adam et al., 2013           | Occupational activity and cognitive reserve: implications in terms of prevention of cognitive aging and Alzheimer's disease                                                                            | Ineligible study design     |
| GM: Midlife & Beyond, 2017  | Study finds education does not protect against cognitive decline in later life                                                                                                                         | Ineligible study design     |
| Dowd et al., 2003           | Can mental and physical activities such as chess and gardening help in the prevention and treatment of Alzheimer's? Healthy aging through stimulation of the mind                                      | Ineligible study design     |
| Beydoun et al., 2014        | Epidemiologic studies of modifiable factors associated with cognition and dementia: systematic review and meta-analysis                                                                                | Ineligible study design     |
| Gilland, 2007               | Continuing education topic 4: dementia                                                                                                                                                                 | Ineligible study design     |
| Nursing Standard, 2010      | Clinical digest. Cognitive stimulation delays dementia but later decline is faster                                                                                                                     | Ineligible publication type |
| Albert et al., 2007         | Changing the trajectory of cognitive decline?                                                                                                                                                          | Ineligible publication type |
| Bak et al., 2016            | Language lessons to help protect against dementia                                                                                                                                                      | Ineligible publication type |
| Bauer et al., 2002          | RN news watch: clinical highlights. Mentally stimulating activities seem to cut Alzheimer's risk                                                                                                       | Ineligible publication type |
| Burgener et al., 2009       | Effectiveness of community-based, nonpharmacological interventions for early-stage dementia: conclusions and recommendations                                                                           | Ineligible publication type |
| Gatz et al., 2005           | Educating the brain to avoid dementia: can mental exercise prevent Alzheimer disease?                                                                                                                  | Ineligible publication type |
| Rosenberg et al., 2017      | Influence of apoe, age, sex, education and baseline cognition on intervention effects on cognition in the finnish geriatric intervention study to prevent cognitive impairment and disability (FINGER) | Ineligible publication type |
| Summers et al., 2013        | The Tasmanian Healthy Brain Project (THBP): a prospective longitudinal examination of the effect of university-level education in older adults in preventing age-related cognitive                     | Ineligible publication type |
| Wahlund et al., 2006        | [Life-long mental exercise can prevent Alzheimer disease]                                                                                                                                              | Ineligible publication type |
| ACTRN126120001 47886, 2012  | The Body, Brain, Life Program "a prevention trial to reduce risk of Alzheimer's Disease                                                                                                                | Ineligible intervention     |
| Anon et al., 2008           | The Study of Mental Activity and Regular Training for the Prevention of Cognitive Decline in at Risk Individuals: The SMART Trial Or The Study of Mental Activity and Regular                          | Ineligible intervention     |
| Brenes et al., 2003         | Cognitive training may improve targeted cognitive functions in older adults                                                                                                                            | Ineligible intervention     |
| Fratiglioni et al., 2007    | Prevention of Alzheimer's disease and dementia. Major findings from the Kungsholmen Project                                                                                                            | Ineligible intervention     |
| Gatz et al., 2006           | Lifestyle risk and delaying factors                                                                                                                                                                    | Ineligible intervention     |
| Hall et al., 2009           | Cognitive activities delay onset of memory decline in persons who develop dementia                                                                                                                     | Ineligible intervention     |
| Harmanci et al., 2003       | Risk factors for Alzheimer disease: a population-based case-control study in Istanbul, Turkey                                                                                                          | Ineligible intervention     |
| Harmanci et al., 2003       | Risk factors for Alzheimer disease: a population-based case-control study in Istanbul, Turkey                                                                                                          | Ineligible intervention     |
| Kwok et al., 2011           | Effectiveness of coordination exercise in improving cognitive function in older adults: a prospective study                                                                                            | Ineligible intervention     |
| Le Carret et al., 2003      | The effect of education on cognitive performances and its implication for the constitution of the cognitive reserve                                                                                    | Ineligible intervention     |
| Merom et al., 2016          | Cognitive benefits of social dancing and walking in old age: The dancing mind randomized controlled trial                                                                                              | Ineligible intervention     |
| Roberts et al., 2015        | Risk and protective factors for cognitive impairment in persons aged 85 years and older                                                                                                                | Ineligible intervention     |
| Sandro et al., 2008         | Risk-reducing effect of education in Alzheimer's disease                                                                                                                                               | Ineligible intervention     |
| Sattler et al., 2012        | Cognitive activity, education and socioeconomic status as preventive factors for mild cognitive impairment and Alzheimer's disease                                                                     | Ineligible intervention     |
| Schultz et al., 2015        | Participation in cognitively-stimulating activities is associated with brain structure and cognitive function in preclinical Alzheimer's disease                                                       | Ineligible intervention     |
| Soubelet et al., 2011       | Engaging in cultural activities compensates for educational differences in cognitive abilities                                                                                                         | Ineligible intervention     |

|    |                                                                   |                                                                                                                                                                                  |                                       |
|----|-------------------------------------------------------------------|----------------------------------------------------------------------------------------------------------------------------------------------------------------------------------|---------------------------------------|
| 1  |                                                                   |                                                                                                                                                                                  |                                       |
| 2  |                                                                   |                                                                                                                                                                                  |                                       |
| 3  |                                                                   |                                                                                                                                                                                  |                                       |
| 4  | Stanford University, 2012                                         | Activities for Cognitive Enhancement of Seniors                                                                                                                                  | Ineligible intervention               |
| 5  | Then et al., 2016                                                 | Education as protector against dementia, but what exactly do we mean by education?                                                                                               | Ineligible intervention               |
| 6  |                                                                   |                                                                                                                                                                                  |                                       |
| 7  | University Hospital 2016                                          | Long-term Effects of Interventional Strategies to Prevent Cognitive Decline in Elderly                                                                                           | Ineligible intervention               |
| 8  | VanDijk et al., 2008                                              | No protective effects of education during normal cognitive aging: results from the 6-year follow-up of the Maastricht Aging Study                                                | Ineligible intervention               |
| 9  |                                                                   |                                                                                                                                                                                  |                                       |
| 10 | Vemuri et al., 2014                                               | Association of lifetime intellectual enrichment with cognitive decline in the older population                                                                                   | Ineligible intervention               |
| 11 |                                                                   |                                                                                                                                                                                  |                                       |
| 12 | Wang et al., 2002                                                 | Late-life engagement in social and leisure activities is associated with a decreased risk of dementia: a longitudinal study from the Kungsholmen project                         | Ineligible intervention               |
| 13 |                                                                   |                                                                                                                                                                                  |                                       |
| 14 | Yaffe et al., 2009                                                | Predictors of maintaining cognitive function in older adults: the Health ABC study                                                                                               | Ineligible intervention               |
| 15 |                                                                   |                                                                                                                                                                                  |                                       |
| 16 | Kliegel et al., 2004                                              | Life-long intellectual activities mediate the predictive effect of early education on cognitive impairment in centenarians: A retrospective study                                | Ineligible populations                |
| 17 |                                                                   |                                                                                                                                                                                  |                                       |
| 18 | Jonaitis et al., 2013                                             | Cognitive activities and cognitive performance in middle-aged adults at risk for Alzheimer's disease                                                                             | Ineligible populations                |
| 19 | Friedland et al., 2001                                            | Patients with Alzheimer's disease have reduced activities in midlife compared with healthy control-group members                                                                 | No information about the intervention |
| 20 | National University,                                              | Choral Singing For the Prevention of Dementia                                                                                                                                    | not finished study                    |
| 21 |                                                                   |                                                                                                                                                                                  |                                       |
| 22 | Marquez et al., 2017                                              | Regular Latin Dancing and Health Education may Improve Cognition of Late Middle-Aged and Older Latinos                                                                           | Ineligible comparison;                |
| 23 | University Hospital 2018                                          | Prospective Population Based Cohort Study on Cognitive and Cardiovascular Aging (MonaLisaPredor)                                                                                 | not finished study;                   |
| 24 |                                                                   |                                                                                                                                                                                  |                                       |
| 25 | Janssen Research Development 2018                                 | Cognitive Health in Ageing Register: Investigational, Observational and Trial Studies in Dementia Research: Prospective Readiness Cohort Study                                   | not finished study                    |
| 26 | ACTRN126170008 58392 2017                                         | Ageing and Folk Dances from the Basque Country: Functional and neuropsychological changes. A controlled trial.                                                                   | Ineligible intervention               |
| 27 |                                                                   |                                                                                                                                                                                  |                                       |
| 28 | Biasutti et al., 2018                                             | Assessing a cognitive music training for older participants: a randomised controlled trial                                                                                       | Ineligible population                 |
| 29 |                                                                   |                                                                                                                                                                                  |                                       |
| 30 | Centre de Recherche del'Institut Universitaire de Geriatrie, 2018 | Impact of a Cognitive Intervention Enriched With Leisure Activities in Persons With Subjective Cognitive Decline                                                                 | Not finished study                    |
| 31 |                                                                   |                                                                                                                                                                                  |                                       |
| 32 | Chan et al., 2016                                                 | Training Older Adults to Use Tablet Computers: Does It Enhance Cognitive Function?                                                                                               | Ineligible study design               |
| 33 |                                                                   |                                                                                                                                                                                  |                                       |
| 34 | Ihle et al., 2017                                                 | The relation of education and cognitive activity to mini-mental state in old age: The role of functional fitness status                                                          | Ineligible intervention               |
| 35 |                                                                   |                                                                                                                                                                                  |                                       |
| 36 | Krell-Roesch et al., 2017                                         | Association Between Mentally Stimulating Activities in Late Life and the Outcome of Incident Mild Cognitive Impairment, With an Analysis of the APOE epsilon4 Genotype           | Ineligible intervention               |
| 37 | NCT02919748, 2016                                                 | Choral Singing For the Prevention of Dementia                                                                                                                                    | Not finished study                    |
| 38 |                                                                   |                                                                                                                                                                                  |                                       |
| 39 | Ramos et al., 2017                                                | Does learning a language in the elderly enhance switching ability?                                                                                                               | Ineligible outcome                    |
| 40 |                                                                   |                                                                                                                                                                                  |                                       |
| 41 | Wang et al., 2017                                                 | Association of lifelong exposure to cognitive reserve-enhancing factors with dementia risk: A community-based cohort study                                                       | Ineligible intervention               |
| 42 | Zanesco et al., 2018                                              | Mental training of attention through intensive meditation: Longitudinal behavioral and electrophysiological investigations of visual sustained attention and response inhibition | Not retrievable                       |
| 43 | Zhu et al., 2017                                                  | Leisure activities, education, and cognitive impairment in Chinese older adults: A population-based longitudinal study                                                           | Ineligible intervention               |
| 44 | 2017                                                              | Study suggests late-life activities reduce the risk of mild cognitive impairment                                                                                                 | Ineligible study design               |
| 45 |                                                                   |                                                                                                                                                                                  |                                       |
| 46 |                                                                   |                                                                                                                                                                                  |                                       |
| 47 |                                                                   |                                                                                                                                                                                  |                                       |
| 48 |                                                                   |                                                                                                                                                                                  |                                       |
| 49 |                                                                   |                                                                                                                                                                                  |                                       |
| 50 |                                                                   |                                                                                                                                                                                  |                                       |
| 51 |                                                                   |                                                                                                                                                                                  |                                       |
| 52 |                                                                   |                                                                                                                                                                                  |                                       |
| 53 |                                                                   |                                                                                                                                                                                  |                                       |
| 54 |                                                                   |                                                                                                                                                                                  |                                       |
| 55 |                                                                   |                                                                                                                                                                                  |                                       |
| 56 |                                                                   |                                                                                                                                                                                  |                                       |
| 57 |                                                                   |                                                                                                                                                                                  |                                       |
| 58 |                                                                   |                                                                                                                                                                                  |                                       |
| 59 |                                                                   |                                                                                                                                                                                  |                                       |
| 60 |                                                                   |                                                                                                                                                                                  |                                       |

## Overview of Systematic Reviews

| Study                    | Title                                                                                                                                    | Reason for Exclusion                                          |
|--------------------------|------------------------------------------------------------------------------------------------------------------------------------------|---------------------------------------------------------------|
| Bernhardt et al., 2002   | [The effect of psychosocial factors on risk of dementia]                                                                                 | Ineligible intervention                                       |
| Bleakley et al., 2015    | Gaming for health: a systematic review of the physical and cognitive effects of interactive computer games in older adults               | Ineligible intervention                                       |
| Conti et al., 2009       | The potential role of leisure in the prevention of dementia                                                                              | Not retrievable                                               |
| Fratiglioni et al., 2004 | An active and socially integrated lifestyle in late life might protect against dementia                                                  | Ineligible study design                                       |
| Karkou et al., 2017      | Dance movement therapy for dementia                                                                                                      | Ineligible population                                         |
| Lee et al., 2019         | Systematic review of health behavioral risks and cognitive health in older adults                                                        | Ineligible intervention                                       |
| Liapis et al., 2017      | Meaningful use of computers has a potential therapeutic and preventative role in dementia care: A systematic review                      | Ineligible intervention                                       |
| Munn et al., 2010        | Review summaries: evidence for nursing practice. Cognitive leisure activities and their role in preventing dementia: a systematic review | Ineligible publication type                                   |
| Opdebeeck et al., 2014   | Cognitive reserve and cognitive function: A meta-analysis                                                                                | Ineligible publication type                                   |
| Stephen et al., 2017     | Physical Activity and Alzheimer's Disease: A Systematic Review                                                                           | Ineligible intervention                                       |
| Stern et al., 2010       | Cognitive leisure activities and their role in preventing dementia: a systematic review                                                  | Study superseded by more recent study                         |
| Stern et al., 2009       | Cognitive leisure activities and their role in preventing dementia: a systematic review                                                  | Ineligible publication type                                   |
| Wang et al., 2012        | Leisure activities, cognition and dementia                                                                                               | Study superseded by more recent study                         |
| Wayne et al., 2014       | Effect of tai chi on cognitive performance in older adults: systematic review and meta-analysis                                          | Ineligible intervention                                       |
| Zheng et al., 2015       | Tai Chi and the Protection of Cognitive Ability: A Systematic Review of Prospective Studies in Healthy Adults                            | Ineligible intervention                                       |
| Fallahpour et al., 2016  | Leisure-activity participation to prevent later-life cognitive decline: a systematic review                                              | Study superseded by more recent study (search only till 2011) |
| Bediou et al., 2018      | Meta-Analysis of Action Video Game Impact on Perceptual, Attentional, and Cognitive Skills                                               | Ineligible population                                         |
| Howes et al., 2017       | Gaming for Health: Systematic Review and Meta-analysis of the Physical and Cognitive Effects of Active Computer Gaming in Older Adults   | Ineligible intervention                                       |
| Klimova et al., 2017     | Cognitive decline in normal aging and its prevention: a review on non-pharmacological lifestyle strategies                               | Ineligible intervention                                       |
| Schneider et al., 2018   | Potential Cognitive Benefits From Playing Music Among Cognitively Intact Older Adults: A Scoping Review                                  | Ineligible study design                                       |
| Solloway et al., 2016    | An evidence map of the effect of Tai Chi on health outcomes                                                                              | Ineligible study design                                       |
| Wouters et al., 2013     | A meta-analysis of the cognitive and motivational effects of serious games                                                               | Ineligible study design                                       |
| Zhang et al., 2016       | Physical and Cognitive Impacts of Digital Games on Older Adults: A Meta-Analytic Review                                                  | Ineligible intervention                                       |

**GRADE of Recommendations:**

**Cognitive leisure activities compared to no cognitive leisure activities for the prevention of dementia (OPDEBEEK et al.)**

**Patient or population:** over 60 years, non-demented adults at baseline

**Intervention:** cognitive leisure activities

**Comparison:** no cognitive leisure activities

| Outcomes                      | Anticipated absolute effects* (95% CI)          |                                                                                                                  | Relative effect (95% CI) | No of participants (studies) | Certainty of the evidence (GRADE) | Comments |
|-------------------------------|-------------------------------------------------|------------------------------------------------------------------------------------------------------------------|--------------------------|------------------------------|-----------------------------------|----------|
|                               | Risk with no cognitive leisure activities       | Risk with cognitive leisure activities                                                                           |                          |                              |                                   |          |
| Overall cognitive functioning | The mean overall cognitive functioning was 0 SD | The mean overall cognitive functioning in the intervention group was 0,26 SD higher (0,21 higher to 0,31 higher) | -                        | (31 observational studies)   | ⊕○○○<br>VERY LOW <sup>a,b</sup>   |          |

\*The risk in the intervention group (and its 95% confidence interval) is based on the assumed risk in the comparison group and the relative effect of the intervention (and its 95% CI).

CI: Confidence interval; MD: Mean difference

**GRADE Working Group grades of evidence**

**High certainty:** We are very confident that the true effect lies close to that of the estimate of the effect

**Moderate certainty:** We are moderately confident in the effect estimate: The true effect is likely to be close to the estimate of the effect, but there is a possibility that it is substantially different

**Low certainty:** Our confidence in the effect estimate is limited: The true effect may be substantially different from the estimate of the effect

**Very low certainty:** We have very little confidence in the effect estimate: The true effect is likely to be substantially different from the estimate of effect

**Explanations**

a. I<sup>2</sup> = 94%, b. Interventions vary between studies

**Video Games compared to no Video Games for the prevention of dementia (TORIL et al.)**

**Patient or population:** 50-86 years, healthy older adults

**Intervention:** Video Games

**Comparison:** no Video Games

| Outcomes           | Anticipated absolute effects* (95% CI) |                       | Relative effect (95% CI) | No of participants (studies)      | Certainty of the evidence (GRADE) | Comments |
|--------------------|----------------------------------------|-----------------------|--------------------------|-----------------------------------|-----------------------------------|----------|
|                    | Risk with no Video Games               | Risk with Video Games |                          |                                   |                                   |          |
| Cognitive Function | -                                      | -                     | -                        | 913<br>(20 observational studies) | ⊕○○○<br>VERY LOW <sup>a</sup>     |          |

\*The risk in the intervention group (and its 95% confidence interval) is based on the assumed risk in the comparison group and the relative effect of the intervention (and its 95% CI).

CI: Confidence interval; SMD: Standardised mean difference

**GRADE Working Group grades of evidence**

**High certainty:** We are very confident that the true effect lies close to that of the estimate of the effect

**Moderate certainty:** We are moderately confident in the effect estimate: The true effect is likely to be close to the estimate of the effect, but there is a possibility that it is substantially different

**Low certainty:** Our confidence in the effect estimate is limited: The true effect may be substantially different from the estimate of the effect

**Very low certainty:** We have very little confidence in the effect estimate: The true effect is likely to be substantially different from the estimate of effect

**Explanations**

a. Mixing various different interventions and study designs

1  
2  
3  
4  
5  
6  
7  
8  
9  
10  
11  
12  
13  
14  
15  
16  
17  
18  
19  
20  
21  
22  
23  
24  
25  
26  
27  
28  
29  
30  
31  
32  
33  
34  
35  
36  
37  
38  
39  
40  
41  
42  
43  
44  
45  
46

**Cognitive leisure activities compared to no cognitive leisure activities for healthy older adults (YATES et al.)**

**Patient or population:** over 46 years, healthy older adults, **Intervention:** cognitive leisure activities, **Comparison:** no cognitive leisure activities

| Outcomes                          | Anticipated absolute effects* (95% CI)    |                                        | Relative effect (95% CI)            | No of participants (studies)                    | Certainty of the evidence (GRADE) | Comments |
|-----------------------------------|-------------------------------------------|----------------------------------------|-------------------------------------|-------------------------------------------------|-----------------------------------|----------|
|                                   | Risk with no cognitive leisure activities | Risk with cognitive leisure activities |                                     |                                                 |                                   |          |
| Incidence of AD                   | 0 per 1.000                               | <b>0 per 1.000</b><br>(0 to 0)         | <b>RR 0.610</b><br>(0.418 to 0.900) | (3 observational studies)                       | ⊕○○○<br>VERY LOW <sup>a,b</sup>   |          |
| Incidence of AD                   | 0 per 1.000                               | <b>NaN per 1.000</b><br>(NaN to NaN)   | <b>HR 0.584</b><br>(0.462 to 0.739) | (2 observational studies)                       | ⊕○○○<br>VERY LOW <sup>b</sup>     |          |
| Incidence of AD                   | <b>Low</b>                                |                                        | <b>OR 0.775</b><br>(0.668 to 0.899) | 0 cases 0 controls<br>(2 observational studies) | ⊕○○○<br>VERY LOW <sup>b,c</sup>   |          |
|                                   | 0 per 1.000                               | <b>0 per 1.000</b><br>(0 to 0)         |                                     |                                                 |                                   |          |
| Incidence of cognitive impairment | 0 per 1.000                               | <b>0 per 1.000</b><br>(0 to 0)         | <b>OR 0.685</b><br>(0.550 to 0.845) | (5 observational studies)                       | ⊕○○○<br>VERY LOW <sup>b</sup>     |          |
| Incidence of cognitive impairment | 0 per 1.000                               | <b>NaN per 1.000</b><br>(NaN to NaN)   | <b>HR 0.853</b><br>(0.711 to 1.022) | (3 observational studies)                       | ⊕○○○<br>VERY LOW <sup>b,c</sup>   |          |

\*The risk in the intervention group (and its 95% confidence interval) is based on the assumed risk in the comparison group and the relative effect of the intervention (and its 95% CI).  
CI: Confidence interval; RR: Risk ratio; HR: Hazard Ratio; OR: Odds ratio

**Explanations**

a. moderate heterogeneity, x<sup>2</sup> test p=0.09, b. differences in interventions (definition of cognitive leisure activities varies across studies), c. high heterogeneity, x<sup>2</sup> test p=0.00, confidence intervals do not overlap

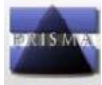

# PRISMA 2009 Checklist

| Section/topic                      | #  | Checklist item                                                                                                                                                                                                                                                                                              | Reported on page #         |
|------------------------------------|----|-------------------------------------------------------------------------------------------------------------------------------------------------------------------------------------------------------------------------------------------------------------------------------------------------------------|----------------------------|
| <b>TITLE</b>                       |    |                                                                                                                                                                                                                                                                                                             |                            |
| Title                              | 1  | Identify the report as a systematic review, meta-analysis, or both.                                                                                                                                                                                                                                         | Page 1 (line 1-3)          |
| <b>ABSTRACT</b>                    |    |                                                                                                                                                                                                                                                                                                             |                            |
| Structured summary                 | 2  | Provide a structured summary including, as applicable: background; objectives; data sources; study eligibility criteria, participants, and interventions; study appraisal and synthesis methods; results; limitations; conclusions and implications of key findings; systematic review registration number. | Page 3-4 (line 40-67)      |
| <b>INTRODUCTION</b>                |    |                                                                                                                                                                                                                                                                                                             |                            |
| Rationale                          | 3  | Describe the rationale for the review in the context of what is already known.                                                                                                                                                                                                                              | Page 5-7 (line 127-132)    |
| Objectives                         | 4  | Provide an explicit statement of questions being addressed with reference to participants, interventions, comparisons, outcomes, and study design (PICOS).                                                                                                                                                  | Page 7 (line 133-144)      |
| <b>METHODS</b>                     |    |                                                                                                                                                                                                                                                                                                             |                            |
| Protocol and registration          | 5  | Indicate if a review protocol exists, if and where it can be accessed (e.g., Web address), and, if available, provide registration information including registration number.                                                                                                                               | Page 7 (line 149-151)      |
| Eligibility criteria               | 6  | Specify study characteristics (e.g., PICOS, length of follow-up) and report characteristics (e.g., years considered, language, publication status) used as criteria for eligibility, giving rationale.                                                                                                      | Page 8-9 (line 171-196)    |
| Information sources                | 7  | Describe all information sources (e.g., databases with dates of coverage, contact with study authors to identify additional studies) in the search and date last searched.                                                                                                                                  | Page 9-10 (line 197-214)   |
| Search                             | 8  | Present full electronic search strategy for at least one database, including any limits used, such that it could be repeated.                                                                                                                                                                               | Supplementary file 3 and 4 |
| Study selection                    | 9  | State the process for selecting studies (i.e., screening, eligibility, included in systematic review, and, if applicable, included in the meta-analysis).                                                                                                                                                   | Page 10 (line 215-218)     |
| Data collection process            | 10 | Describe method of data extraction from reports (e.g., piloted forms, independently, in duplicate) and any processes for obtaining and confirming data from investigators.                                                                                                                                  | Page 10 (line 219-226)     |
| Data items                         | 11 | List and define all variables for which data were sought (e.g., PICOS, funding sources) and any assumptions and simplifications made.                                                                                                                                                                       | Page 10 (line 222-226)     |
| Risk of bias in individual studies | 12 | Describe methods used for assessing risk of bias of individual studies (including specification of whether this was done at the study or outcome level), and how this information is to be used in any data synthesis.                                                                                      | Page 10-11 (line 227-233)  |
| Summary measures                   | 13 | State the principal summary measures (e.g., risk ratio, difference in means).                                                                                                                                                                                                                               | Page 11 (line 234-240)     |



# PRISMA 2009 Checklist

|                      |    |                                                                                                                                                           |                        |
|----------------------|----|-----------------------------------------------------------------------------------------------------------------------------------------------------------|------------------------|
| Synthesis of results | 14 | Describe the methods of handling data and combining results of studies, if done, including measures of consistency (e.g., $I^2$ ) for each meta-analysis. | Page 11 (line 234-240) |
|----------------------|----|-----------------------------------------------------------------------------------------------------------------------------------------------------------|------------------------|

Page 1 of 2

| Section/topic               | #  | Checklist item                                                                                                                                   | Reported on page # |
|-----------------------------|----|--------------------------------------------------------------------------------------------------------------------------------------------------|--------------------|
| Risk of bias across studies | 15 | Specify any assessment of risk of bias that may affect the cumulative evidence (e.g., publication bias, selective reporting within studies).     | NA                 |
| Additional analyses         | 16 | Describe methods of additional analyses (e.g., sensitivity or subgroup analyses, meta-regression), if done, indicating which were pre-specified. | NA                 |

## RESULTS

|                               |    |                                                                                                                                                                                                          |                                                              |
|-------------------------------|----|----------------------------------------------------------------------------------------------------------------------------------------------------------------------------------------------------------|--------------------------------------------------------------|
| Study selection               | 17 | Give numbers of studies screened, assessed for eligibility, and included in the review, with reasons for exclusions at each stage, ideally with a flow diagram.                                          | Page 11 (line 238-243)<br>Figure 2 and figure 3              |
| Study characteristics         | 18 | For each study, present characteristics for which data were extracted (e.g., study size, PICOS, follow-up period) and provide the citations.                                                             | Page 11-12 (line 255-278)<br>Table 1 and table 2             |
| Risk of bias within studies   | 19 | Present data on risk of bias of each study and, if available, any outcome level assessment (see item 12).                                                                                                | Page 13-14<br>Table 1 and table 2                            |
| Results of individual studies | 20 | For all outcomes considered (benefits or harms), present, for each study: (a) simple summary data for each intervention group (b) effect estimates and confidence intervals, ideally with a forest plot. | Page 13-17 (line 288-351)<br>Table 1 and table 2             |
| Synthesis of results          | 21 | Present results of each meta-analysis done, including confidence intervals and measures of consistency.                                                                                                  | NA                                                           |
| Risk of bias across studies   | 22 | Present results of any assessment of risk of bias across studies (see Item 15).                                                                                                                          | Page 12 (line 264-266; line 273-278)<br>Supplementary file 5 |
| Additional analysis           | 23 | Give results of additional analyses, if done (e.g., sensitivity or subgroup analyses, meta-regression [see Item 16]).                                                                                    | NA                                                           |

## DISCUSSION

|                     |    |                                                                                                                                                                                      |         |
|---------------------|----|--------------------------------------------------------------------------------------------------------------------------------------------------------------------------------------|---------|
| Summary of evidence | 24 | Summarize the main findings including the strength of evidence for each main outcome; consider their relevance to key groups (e.g., healthcare providers, users, and policy makers). | Page 18 |
|---------------------|----|--------------------------------------------------------------------------------------------------------------------------------------------------------------------------------------|---------|





# PRISMA 2009 Checklist

|                |    |                                                                                                                                                               |                        |
|----------------|----|---------------------------------------------------------------------------------------------------------------------------------------------------------------|------------------------|
| Limitations    | 25 | Discuss limitations at study and outcome level (e.g., risk of bias), and at review-level (e.g., incomplete retrieval of identified research, reporting bias). | Page 19                |
| Conclusions    | 26 | Provide a general interpretation of the results in the context of other evidence, and implications for future research.                                       | Page 20                |
| <b>FUNDING</b> |    |                                                                                                                                                               |                        |
| Funding        | 27 | Describe sources of funding for the systematic review and other support (e.g., supply of data); role of funders for the systematic review.                    | Page 21 (line 423-425) |

From: Moher D, Liberati A, Tetzlaff J, Altman DG, The PRISMA Group (2009). Preferred Reporting Items for Systematic Reviews and Meta-Analyses: The PRISMA Statement. PLoS Med 6(6): e1000097. doi:10.1371/journal.pmed1000097

For more information, visit: [www.prisma-statement.org](http://www.prisma-statement.org).

Page 2 of 2
