# Supplementary material for: Continuing education for the prevention of mild cognitive impairment and Alzheimer’s-type dementia: a systematic review and overview of systematic reviews
Source: PubMed Central journal article supplement — BMJ Open. 2019 Jul 2;9(7):e027719. doi: 10.1136/bmjopen-2018-027719 (PMC6609120; doi:10.1136/bmjopen-2018-027719), 2019-07-02
Supplement: bmjopen-2018-027719supp003.pdf [file bmjopen-2018-027719supp003.pdf]

### Supplementary file 3: Search Strategies of Systematic Review, by database

#### Medline (via PubMed):10 July 2017

| Medline |                                                                                                                                                                                                                        |         |
|---------|------------------------------------------------------------------------------------------------------------------------------------------------------------------------------------------------------------------------|---------|
| Search  | Query                                                                                                                                                                                                                  | Hits    |
| 1       | Dementia/ or exp Alzheimer Disease/                                                                                                                                                                                    | 117464  |
| 2       | Cognitive Dysfunction/                                                                                                                                                                                                 | 5918    |
| 3       | Cognition/                                                                                                                                                                                                             | 81481   |
| 4       | (dementia or alzheimer*).ti,ab.                                                                                                                                                                                        | 174908  |
| 5       | ((cognit* or memory or mental) adj3 (impair* or decline* or deficit* or reduc* or function*)).ti,ab.                                                                                                                   | 166793  |
| 6       | or/1-5                                                                                                                                                                                                                 | 370522  |
| 7       | Primary Prevention/                                                                                                                                                                                                    | 16883   |
| 8       | prevent*.ti,ab.                                                                                                                                                                                                        | 1207345 |
| 9       | (protect* or reduc* or delay* or improv*).ti.                                                                                                                                                                          | 710454  |
| 10      | or/7-9                                                                                                                                                                                                                 | 1858549 |
| 11      | 6 and 10                                                                                                                                                                                                               | 39070   |
| 12      | Dementia/pc or exp Alzheimer Disease/pc or Cognitive Dysfunction/pc [Prevention & Control]                                                                                                                             | 4039    |
| 13      | 11 or 12                                                                                                                                                                                                               | 41057   |
| 14      | exp Education, Continuing/                                                                                                                                                                                             | 60977   |
| 15      | ((continuing or adult) adj2 (education or training)).af.                                                                                                                                                               | 80639   |
| 16      | (lifelong learning or life-long learning).af.                                                                                                                                                                          | 2396    |
| 17      | education/ or exp curriculum/ or exp education, distance/ or exp education, nonprofessional/ or exp educational measurement/ or exp international educational exchange/ or mentoring/ or exp schools/ or exp teaching/ | 500562  |
| 18      | Learning/                                                                                                                                                                                                              | 56308   |
| 19      | Students/                                                                                                                                                                                                              | 47445   |
| 20      | exp Educational Status/                                                                                                                                                                                                | 47641   |
| 21      | (learn* or class or classes or course? or educat* or school* or train* or seminar* or tutor*).ti.                                                                                                                      | 569072  |
| 22      | education.fs. not exp Health Personnel/ed                                                                                                                                                                              | 200448  |
| 23      | (cognitiv* adj2 (stimulat* or activit*)).ti.                                                                                                                                                                           | 742     |
| 24      | or/14-23                                                                                                                                                                                                               | 1075912 |
| 25      | 13 and 24                                                                                                                                                                                                              | 3357    |
| 26      | exp Dementia/dt [Drug Therapy]                                                                                                                                                                                         | 17955   |
| 27      | 25 not 26                                                                                                                                                                                                              | 3243    |
| 28      | exp animals/ not exp humans/                                                                                                                                                                                           | 4438320 |
| 29      | 27 not 28                                                                                                                                                                                                              | 2497    |
| 30      | exp age groups/ not (exp aged/ or middle aged/)                                                                                                                                                                        | 3709828 |
| 31      | 29 not 30                                                                                                                                                                                                              | 1838    |
| 32      | limit 31 to yr="1990 -Current"                                                                                                                                                                                         | 1805    |
| 33      | remove duplicates from 32                                                                                                                                                                                              | 1695    |

## Medline (via PubMed): updated 5 April 2018

| Search | Query                                                                                                                                                                                                                  | Results |
|--------|------------------------------------------------------------------------------------------------------------------------------------------------------------------------------------------------------------------------|---------|
| 1      | Dementia/ or exp Alzheimer Disease/                                                                                                                                                                                    | 118649  |
| 2      | Cognitive Dysfunction/                                                                                                                                                                                                 | 7920    |
| 3      | Cognition/                                                                                                                                                                                                             | 82659   |
| 4      | (dementia or alzheimer*).ti,ab.                                                                                                                                                                                        | 178991  |
| 5      | ((cognit* or memory or mental) adj3 (impair* or decline* or deficit* or reduc* or function*)).ti,ab.                                                                                                                   | 171636  |
| 6      | or/1-5                                                                                                                                                                                                                 | 378202  |
| 7      | Primary Prevention/                                                                                                                                                                                                    | 16649   |
| 8      | prevent*.ti,ab.                                                                                                                                                                                                        | 1222908 |
| 9      | (protect* or reduc* or delay* or improv* or increas* or decreas*).ti.                                                                                                                                                  | 1008130 |
| 10     | or/7-9                                                                                                                                                                                                                 | 2152629 |
| 11     | 6 and 10                                                                                                                                                                                                               | 46477   |
| 12     | Dementia/pc or exp Alzheimer Disease/pc or Cognitive Dysfunction/pc or Cognition Disorders/pc [Prevention & Control]                                                                                                   | 6391    |
| 13     | Cognitive Reserve/                                                                                                                                                                                                     | 388     |
| 14     | cognitive reserve.ti,ab.                                                                                                                                                                                               | 949     |
| 15     | or/11-14                                                                                                                                                                                                               | 50722   |
| 16     | exp Education, Continuing/                                                                                                                                                                                             | 58777   |
| 17     | ((continuing or adult) adj2 (education or training)).af.                                                                                                                                                               | 77985   |
| 18     | (lifelong learning or life-long learning).af.                                                                                                                                                                          | 2438    |
| 19     | education/ or exp curriculum/ or exp education, distance/ or exp education, nonprofessional/ or exp educational measurement/ or exp international educational exchange/ or mentoring/ or exp schools/ or exp teaching/ | 561833  |
| 20     | Learning/                                                                                                                                                                                                              | 57102   |
| 21     | Students/                                                                                                                                                                                                              | 48337   |
| 22     | exp Educational Status/                                                                                                                                                                                                | 47241   |
| 23     | (learn* or class or classes or course? or educat* or school* or train* or seminar* or tutor*).ti.                                                                                                                      | 571948  |
| 24     | education.fs. not exp Health Personnel/ed                                                                                                                                                                              | 199668  |
| 25     | (cognitiv* adj2 (stimulat* or activit*)).ti.                                                                                                                                                                           | 773     |
| 26     | (late-life adj2 (activity or activities or learn* or school* or educat* or training)).ti,ab.                                                                                                                           | 93      |
| 27     | or/16-26                                                                                                                                                                                                               | 1135186 |
| 28     | 15 and 27                                                                                                                                                                                                              | 4360    |
| 29     | exp Dementia/dt [Drug Therapy]                                                                                                                                                                                         | 18096   |
| 30     | 28 not 29                                                                                                                                                                                                              | 4227    |
| 31     | exp animals/ not exp humans/                                                                                                                                                                                           | 4439627 |
| 32     | 30 not 31                                                                                                                                                                                                              | 3347    |
| 33     | exp age groups/ not (exp aged/ or middle aged/)                                                                                                                                                                        | 3685655 |
| 34     | 32 not 33                                                                                                                                                                                                              | 2546    |
| 35     | (201707* or 201708* or 201709* or 20171* or 2018*).ed.                                                                                                                                                                 | 749049  |
| 36     | ("2017/07*" or "2017/08*" or "2017/09*" or "2017/1*" or 2018*).dt.                                                                                                                                                     | 942206  |
| 37     | 35 or 36                                                                                                                                                                                                               | 1540516 |
| 38     | 34 and 37                                                                                                                                                                                                              | 364     |
| 39     | limit 34 to yr="2017 -Current"                                                                                                                                                                                         | 348     |
| 40     | 38 or 39                                                                                                                                                                                                               | 435     |

## Cochrane Library (10 July 2017)

| Cochrane Library |                                                                                                                                                                                                                                          |        |
|------------------|------------------------------------------------------------------------------------------------------------------------------------------------------------------------------------------------------------------------------------------|--------|
| Search           | Query                                                                                                                                                                                                                                    | Hits   |
| #1               | [mh ^Dementia] or [mh "Alzheimer Disease"]                                                                                                                                                                                               | 4053   |
| #2               | [mh ^"Cognitive Dysfunction"]                                                                                                                                                                                                            | 0      |
| #3               | [mh ^Cognition]                                                                                                                                                                                                                          | 6276   |
| #4               | (dementia or alzheimer*):ti,ab,kw                                                                                                                                                                                                        | 11882  |
| #5               | ((cognit* or memory or mental) near/3 (impair* or decline* or deficit* or reduc* or function*)):ti,ab                                                                                                                                    | 16173  |
| #6               | {or #1-#5}                                                                                                                                                                                                                               | 27711  |
| #7               | [mh ^"Primary Prevention"]                                                                                                                                                                                                               | 1008   |
| #8               | prevent*:ti,ab,kw                                                                                                                                                                                                                        | 107750 |
| #9               | (protect* or reduc* or delay* or improv*):ti                                                                                                                                                                                             | 77161  |
| #10              | {or #7-#9}                                                                                                                                                                                                                               | 175365 |
| #11              | #6 and #10                                                                                                                                                                                                                               | 4432   |
| #12              | [mh Dementia/pc] or [mh ^"Cognitive Dysfunction"/pc]                                                                                                                                                                                     | 208    |
| #13              | #11 or #12                                                                                                                                                                                                                               | 4532   |
| #14              | [mh "Education, Continuing"]                                                                                                                                                                                                             | 1168   |
| #15              | ((continuing or adult) near/2 (education or training)):ti,ab,kw                                                                                                                                                                          | 2819   |
| #16              | ("lifelong learning" or "life-long learning"):ti,ab,kw                                                                                                                                                                                   | 19     |
| #17              | [mh ^education] or [mh curriculum] or [mh "education, distance"] or [mh "education, nonprofessional"] or [mh "educational measurement"] or [mh "international educational exchange"] or [mh ^mentoring] or [mh schools] or [mh teaching] | 21839  |
| #18              | [mh ^Learning]                                                                                                                                                                                                                           | 1809   |
| #19              | [mh ^Students]                                                                                                                                                                                                                           | 2041   |
| #20              | [mh "Educational Status"]                                                                                                                                                                                                                | 1348   |
| #21              | (learn* or class or classes or course or courses or educat* or school* or train* or seminar* or tutor*):ti                                                                                                                               | 45060  |
| #22              | (cognitiv* near/2 (stimulat* or activit*)):ti                                                                                                                                                                                            | 212    |
| #23              | (learning or ((education or training) near/2 (nonprofessional or non-professional or distance)) or teaching):kw                                                                                                                          | 12784  |
| #24              | {or #14-#23}                                                                                                                                                                                                                             | 67085  |
| #25              | #13 and #24                                                                                                                                                                                                                              | 784    |
| #26              | [mh "age groups"] not ([mh aged] or [mh "middle aged"])                                                                                                                                                                                  | 104635 |
| #27              | #25 not #26                                                                                                                                                                                                                              | 691    |
| #28              | #27 Publication Year from 1990 to 2017                                                                                                                                                                                                   | 691    |

## Cochrane Library (updated 9 April 2018)

| ID  | Search                                                                                                                                                                                                                                   | Hits   |
|-----|------------------------------------------------------------------------------------------------------------------------------------------------------------------------------------------------------------------------------------------|--------|
| #1  | [mh ^Dementia] or [mh "Alzheimer Disease"]                                                                                                                                                                                               | 4263   |
| #2  | [mh ^"Cognitive Dysfunction"]                                                                                                                                                                                                            | 450    |
| #3  | [mh ^Cognition]                                                                                                                                                                                                                          | 6675   |
| #4  | (dementia or alzheimer*):ti,ab,kw                                                                                                                                                                                                        | 13099  |
| #5  | ((cognit* or memory or mental) near/3 (impair* or decline* or deficit* or reduc* or function*)):ti,ab                                                                                                                                    | 18089  |
| #6  | {or #1-#5}                                                                                                                                                                                                                               | 30564  |
| #7  | [mh ^"Primary Prevention"]                                                                                                                                                                                                               | 1065   |
| #8  | prevent*:ti,ab,kw                                                                                                                                                                                                                        | 115159 |
| #9  | (protect* or reduc* or delay* or improv* or increas* or decreas*):ti                                                                                                                                                                     | 102653 |
| #10 | {or #7-#9}                                                                                                                                                                                                                               | 205354 |
| #11 | #6 and #10                                                                                                                                                                                                                               | 5434   |
| #12 | [mh Dementia/pc] or [mh ^"Cognitive Dysfunction"/pc] or [mh ^"Cognition Disorders"/pc]                                                                                                                                                   | 603    |
| #13 | [mh ^"Cognitive Reserve"]                                                                                                                                                                                                                | 8      |
| #14 | cognitive reserve:ti,ab,kw                                                                                                                                                                                                               | 51     |
| #15 | {or #11-#14}                                                                                                                                                                                                                             | 5791   |
| #16 | [mh "Education, Continuing"]                                                                                                                                                                                                             | 1209   |
| #17 | ((continuing or adult) near/2 (education or training)):ti,ab,kw                                                                                                                                                                          | 3051   |
| #18 | ("lifelong learning" or "life-long learning"):ti,ab,kw                                                                                                                                                                                   | 21     |
| #19 | [mh ^education] or [mh curriculum] or [mh "education, distance"] or [mh "education, nonprofessional"] or [mh "educational measurement"] or [mh "international educational exchange"] or [mh ^mentoring] or [mh schools] or [mh teaching] | 26602  |
| #20 | [mh ^Learning]                                                                                                                                                                                                                           | 1962   |
| #21 | [mh ^Students]                                                                                                                                                                                                                           | 2250   |
| #22 | [mh "Educational Status"]                                                                                                                                                                                                                | 1407   |
| #23 | (learn* or class or classes or course or courses or educat* or school* or train* or seminar* or tutor*):ti                                                                                                                               | 48313  |
| #24 | (cognitiv* near/2 (stimulat* or activit*)):ti                                                                                                                                                                                            | 246    |
| #25 | (learning or ((education or training) near/2 (nonprofessional or non-professional or distance)) or teaching):kw                                                                                                                          | 14622  |
| #26 | (late-life near/2 (activity or activities or learn* or school* or educat* or training)):ti,ab,kw                                                                                                                                         | 8      |
| #27 | {or #16-#26}                                                                                                                                                                                                                             | 75572  |
| #28 | #15 and #27                                                                                                                                                                                                                              | 1055   |
| #29 | [mh "age groups"] not ([mh aged] or [mh "middle aged"])                                                                                                                                                                                  | 109483 |
| #30 | #28 not #29                                                                                                                                                                                                                              | 937    |
| #31 | #30 Publication Year from 2017 to 2018                                                                                                                                                                                                   | 106    |

## Embase (10 July 2017)

| Embase |                                                                                                                                                                                                                                 |         |
|--------|---------------------------------------------------------------------------------------------------------------------------------------------------------------------------------------------------------------------------------|---------|
| Search | Query                                                                                                                                                                                                                           | Hits    |
| #1     | 'dementia'/de                                                                                                                                                                                                                   | 97110   |
| #2     | 'alzheimer disease'/exp                                                                                                                                                                                                         | 156558  |
| #3     | 'mild cognitive impairment'/exp                                                                                                                                                                                                 | 17067   |
| #4     | dementia:ti,ab OR alzheimer*:ti,ab                                                                                                                                                                                              | 226442  |
| #5     | ((cognit* OR memory OR mental) NEAR/3 (impair* OR decline* OR deficit* OR reduc* OR function*)):ti,ab                                                                                                                           | 221649  |
| #6     | #1 OR #2 OR #3 OR #4 OR #5                                                                                                                                                                                                      | 432689  |
| #7     | 'primary prevention'/exp                                                                                                                                                                                                        | 33540   |
| #8     | 'preventive medicine'/exp                                                                                                                                                                                                       | 25875   |
| #9     | prevent*:ti,ab                                                                                                                                                                                                                  | 1469112 |
| #10    | protect*:ti OR reduc*:ti OR delay*:ti OR improv*:ti                                                                                                                                                                             | 850362  |
| #11    | #7 OR #8 OR #9 OR #10                                                                                                                                                                                                           | 2260166 |
| #12    | #6 AND #11                                                                                                                                                                                                                      | 49357   |
| #13    | 'dementia'/dm_pc                                                                                                                                                                                                                | 1833    |
| #14    | 'mild cognitive impairment'/exp/dm_pc                                                                                                                                                                                           | 90      |
| #15    | 'alzheimer disease'/exp/dm_pc                                                                                                                                                                                                   | 4342    |
| #16    | #12 OR #13 OR #14 OR #15                                                                                                                                                                                                        | 52112   |
| #17    | 'continuing education'/exp OR 'continuing education provider'/exp                                                                                                                                                               | 29360   |
| #18    | ((continuing OR adult) NEAR/2 (education OR training)):ti,ab                                                                                                                                                                    | 24617   |
| #19    | lifelong learning':ti,ab OR 'life-long learning':ti,ab                                                                                                                                                                          | 1695    |
| #20    | 'education'/de OR 'adult education'/exp OR 'lifelong learning'/exp OR 'mentoring'/exp OR 'masters education'/exp OR 'postdoctoral education'/exp OR 'postgraduate education'/exp OR 'community college'/exp OR 'university'/exp | 466817  |
| #21    | learn*:ti OR class:ti OR classes:ti OR course*:ti OR educat*:ti OR school*:ti OR train*:ti OR seminar*:ti OR tutor*:ti                                                                                                          | 633869  |
| #22    | (cognitiv* NEAR/2 (stimulat* OR activit*)):ti                                                                                                                                                                                   | 930     |
| #23    | #17 OR #18 OR #19 OR #20 OR #21 OR #22                                                                                                                                                                                          | 1006895 |
| #24    | #16 AND #23                                                                                                                                                                                                                     | 3837    |
| #25    | 'animal'/exp NOT 'human'/exp                                                                                                                                                                                                    | 4833576 |
| #26    | #24 NOT #25                                                                                                                                                                                                                     | 2924    |
| #27    | 'groups by age'/exp NOT ('middle aged'/exp OR 'aged'/exp)                                                                                                                                                                       | 5653684 |
| #28    | #26 NOT #27                                                                                                                                                                                                                     | 2223    |
| #29    | #28 AND [1990-2017]/py                                                                                                                                                                                                          | 2199    |
| #30    | 'medication therapy management'/exp OR 'dementia'/exp/dm_dt OR 'pharmaceutical vehicles and additives'/exp                                                                                                                      | 1386295 |
| #31    | #29 NOT #30                                                                                                                                                                                                                     | 2022    |
| #32    | #31 NOT 'conference abstract'/it                                                                                                                                                                                                | 996     |

## Embase (updated 9 April 2018)

| No. | Query                                                                                                                                                                                                                           | Hits    |
|-----|---------------------------------------------------------------------------------------------------------------------------------------------------------------------------------------------------------------------------------|---------|
| #1  | 'dementia'/exp                                                                                                                                                                                                                  | 308108  |
| #2  | 'alzheimer disease'/exp                                                                                                                                                                                                         | 167836  |
| #3  | 'mild cognitive impairment'/exp                                                                                                                                                                                                 | 19554   |
| #4  | dementia:ti,ab OR alzheimer*:ti,ab                                                                                                                                                                                              | 245698  |
| #5  | ((cognit* OR memory OR mental) NEAR/3 (impair* OR decline* OR deficit* OR reduc* OR function*)):ti,ab                                                                                                                           | 244483  |
| #6  | #1 OR #2 OR #3 OR #4 OR #5                                                                                                                                                                                                      | 519886  |
| #7  | 'primary prevention'/exp                                                                                                                                                                                                        | 35604   |
| #8  | 'preventive medicine'/exp                                                                                                                                                                                                       | 26670   |
| #9  | prevent*:ti,ab                                                                                                                                                                                                                  | 1576370 |
| #10 | protect*:ti OR reduc*:ti OR delay*:ti OR improv*:ti OR increas*:ti OR decreas*:ti                                                                                                                                               | 1272239 |
| #11 | #7 OR #8 OR #9 OR #10                                                                                                                                                                                                           | 2758722 |
| #12 | #6 AND #11                                                                                                                                                                                                                      | 66376   |
| #13 | 'dementia'/dm_pc                                                                                                                                                                                                                | 1929    |
| #14 | 'mild cognitive impairment'/exp/dm_pc                                                                                                                                                                                           | 101     |
| #15 | 'alzheimer disease'/exp/dm_pc                                                                                                                                                                                                   | 4515    |
| #16 | 'cognitive reserve'/exp                                                                                                                                                                                                         | 1346    |
| #17 | 'cognitive reserve':ti,ab                                                                                                                                                                                                       | 1463    |
| #18 | #12 OR #13 OR #14 OR #15 OR #16 OR #17                                                                                                                                                                                          | 70716   |
| #19 | 'continuing education'/exp OR 'continuing education provider'/exp                                                                                                                                                               | 30115   |
| #20 | ((continuing OR adult) NEAR/2 (education OR training)):ti,ab                                                                                                                                                                    | 25787   |
| #21 | 'lifelong learning':ti,ab OR 'life-long learning':ti,ab                                                                                                                                                                         | 1820    |
| #22 | 'education'/de OR 'adult education'/exp OR 'lifelong learning'/exp OR 'mentoring'/exp OR 'masters education'/exp OR 'postdoctoral education'/exp OR 'postgraduate education'/exp OR 'community college'/exp OR 'university'/exp | 492706  |
| #23 | learn*:ti OR class:ti OR classes:ti OR course*:ti OR educat*:ti OR school*:ti OR train*:ti OR seminar*:ti OR tutor*:ti                                                                                                          | 669572  |
| #24 | (cognitiv* NEAR/2 (stimulat* OR activit*)):ti                                                                                                                                                                                   | 1040    |
| #25 | ('late life' NEAR/2 (activity OR activities OR learn* OR school* OR educat* OR training)):ti,ab                                                                                                                                 | 131     |
| #26 | #19 OR #20 OR #21 OR #22 OR #23 OR #24 OR #25                                                                                                                                                                                   | 1064036 |
| #27 | #18 AND #26                                                                                                                                                                                                                     | 5231    |
| #28 | 'animal'/exp NOT 'human'/exp                                                                                                                                                                                                    | 5020589 |
| #29 | #27 NOT #28                                                                                                                                                                                                                     | 4140    |
| #30 | 'groups by age'/exp NOT ('middle aged'/exp OR 'aged'/exp)                                                                                                                                                                       | 6115551 |
| #31 | #29 NOT #30                                                                                                                                                                                                                     | 3114    |
| #32 | 'medication therapy management'/exp OR 'dementia'/exp/dm_dt OR 'pharmaceutical vehicles and additives'/exp                                                                                                                      | 1465869 |
| #33 | #31 NOT #32                                                                                                                                                                                                                     | 2862    |
| #34 | #33 NOT 'conference abstract'/it                                                                                                                                                                                                | 1380    |
| #35 | #34 AND [1-7-2017]/sd NOT [9-4-2018]/sd                                                                                                                                                                                         | 131     |
| #36 | #34 AND [2017-2018]/py                                                                                                                                                                                                          | 174     |
| #37 | #35 OR #36                                                                                                                                                                                                                      | 189     |

## CINHAL (10 July 2017)

| Search | Query                                                                                                                                                                                                                | Limiters/Expanders                      | Hits   |
|--------|----------------------------------------------------------------------------------------------------------------------------------------------------------------------------------------------------------------------|-----------------------------------------|--------|
| S1     | (MH "Dementia") OR (MH "Alzheimer's Disease")                                                                                                                                                                        | Search modes - Find all my search terms | 37751  |
| S2     | dementia OR alzheimer*                                                                                                                                                                                               | Search modes - Find all my search terms | 46604  |
| S3     | ((cognit* OR memory OR mental) N3 (impair* OR decline* OR deficit* OR reduc* OR function*))                                                                                                                          | Search modes - Find all my search terms | 29346  |
| S4     | S1 OR S2 OR S3                                                                                                                                                                                                       | Search modes - Find all my search terms | 67725  |
| S5     | (MH "Preventive Health Care")                                                                                                                                                                                        | Search modes - Find all my search terms | 1075   |
| S6     | TI prevent* OR AB prevent*                                                                                                                                                                                           | Search modes - Find all my search terms | 170718 |
| S7     | TI (protect* OR reduc* OR delay* OR improv*)                                                                                                                                                                         | Search modes - Find all my search terms | 124328 |
| S8     | S5 OR S6 OR S7                                                                                                                                                                                                       | Search modes - Find all my search terms | 290518 |
| S9     | S4 AND S8                                                                                                                                                                                                            | Search modes - Find all my search terms | 6261   |
| S10    | (MH "Dementia/PC") OR (MH "Alzheimer's Disease/PC")                                                                                                                                                                  | Search modes - Find all my search terms | 2009   |
| S11    | S9 OR S10                                                                                                                                                                                                            | Search modes - Find all my search terms | 7692   |
| S12    | (MH "Education, Continuing") OR (MH "Continuing Education Providers") OR (MH "Education, Diploma Programs") OR (MH "Education, Continuing (Credit)") OR (MH "Education, Masters") OR (MH "Education, Post-Doctoral") | Search modes - Find all my search terms | 87064  |
| S13    | (MH "Learning") OR (MH "Lifelong Learning")                                                                                                                                                                          | Search modes - Find all my search terms | 10771  |
| S14    | (MH "Education, Nonprofessional") OR (MH "Adult Education") OR (MH "Education, Non-Traditional+")                                                                                                                    | Search modes - Find all my search terms | 7406   |
| S15    | TI (learn* OR class OR classes OR course* OR educat* OR school* OR train* OR seminar* OR tutor*) OR TI (cognitiv* N2 (stimulat* OR activit*))                                                                        | Search modes - Find all my search terms | 180228 |

|     |                                                                                                   |                                              |        |
|-----|---------------------------------------------------------------------------------------------------|----------------------------------------------|--------|
| S16 | "lifelong learning" OR "life-long learning" OR ((continuing OR adult) N2 (education OR training)) | Search modes - Find all my search terms      | 106290 |
| S17 | S12 OR S13 OR S14 OR S15 OR S16                                                                   | Search modes - Find all my search terms      | 27,763 |
| S18 | S11 AND S17                                                                                       | Search modes - Find all my search terms      | 667    |
| S19 | MH "Animal Studies"                                                                               | Search modes - Find all my search terms      | 39763  |
| S20 | S18 NOT S19                                                                                       | Search modes - Find all my search terms      | 618    |
| S21 | MH "Named Groups by Age+" NOT (MH "Middle Age" OR MH "Aged+")                                     | Search modes - Find all my search terms      | 55371  |
| S22 | S20 NOT S21                                                                                       | Search modes - Find all my search terms      | 552    |
| S23 | S22                                                                                               | Limiters - Published Date: 19900101-20171231 | 557    |



## CINHAL (8 April 2018)

| Search | Query                                                                                                                                                                                                                | Limiters/Expanders                      | Results |
|--------|----------------------------------------------------------------------------------------------------------------------------------------------------------------------------------------------------------------------|-----------------------------------------|---------|
| S1     | (MH "Dementia") OR (MH "Alzheimer's Disease")                                                                                                                                                                        | Search modes - Find all my search terms | 40,224  |
| S2     | dementia OR alzheimer*                                                                                                                                                                                               | Search modes - Find all my search terms | 50,090  |
| S3     | ((cognit* OR memory OR mental) N3 (impair* OR decline* OR deficit* OR reduc* OR function*))                                                                                                                          | Search modes - Find all my search terms | 32,856  |
| S4     | S1 OR S2 OR S3                                                                                                                                                                                                       | Search modes - Find all my search terms | 73,809  |
| S5     | (MH "Preventive Health Care")                                                                                                                                                                                        | Search modes - Find all my search terms | 11,313  |
| S6     | TI prevent* OR AB prevent*                                                                                                                                                                                           | Search modes - Find all my search terms | 186,284 |
| S7     | TI (protect* OR reduc* OR delay* OR improv*)                                                                                                                                                                         | Search modes - Find all my search terms | 134,37  |
| S8     | S5 OR S6 OR S7                                                                                                                                                                                                       | Search modes - Find all my search terms | 315,336 |
| S9     | S4 AND S8                                                                                                                                                                                                            | Search modes - Find all my search terms | 7,002   |
| S10    | (MH "Dementia/PC") OR (MH "Alzheimer's Disease/PC")                                                                                                                                                                  | Search modes - Find all my search terms | 2,127   |
| S11    | S9 OR S10                                                                                                                                                                                                            | Search modes - Find all my search terms | 8,479   |
| S12    | (MH "Education, Continuing") OR (MH "Continuing Education Providers") OR (MH "Education, Diploma Programs") OR (MH "Education, Continuing (Credit)") OR (MH "Education, Masters") OR (MH "Education, Post-Doctoral") | Search modes - Find all my search terms | 89,104  |
| S13    | (MH "Learning") OR (MH "Lifelong Learning")                                                                                                                                                                          | Search modes - Find all my search terms | 11,971  |
| S14    | (MH "Education, Nonprofessional") OR (MH "Adult Education") OR (MH "Education, Non-Traditional+")                                                                                                                    | Search modes - Find all my search terms | 7,799   |
| S15    | TI (learn* OR class OR classes OR course* OR educat* OR school* OR train* OR seminar* OR tutor*) OR TI (cognitiv* N2 (stimulat* OR activit*))                                                                        | Search modes - Find all my search terms | 191,967 |
| S16    | "lifelong learning" OR "life-long learning" OR ((continuing OR adult) N2 (education OR training)) OR ("late life" N1 (activity OR activities OR learn* OR school* OR educat* OR training))                           | Search modes - Find all my search terms | 109,49  |

|     |                                                               |                                         |         |
|-----|---------------------------------------------------------------|-----------------------------------------|---------|
| S17 | S12 OR S13 OR S14 OR S15 OR S16                               | Search modes - Find all my search terms | 290,595 |
| S18 | S11 AND S17                                                   | Search modes - Find all my search terms | 753     |
| S19 | MH "Animal Studies"                                           | Search modes - Find all my search terms | 43,810  |
| S20 | S18 NOT S19                                                   | Search modes - Find all my search terms | 691     |
| S21 | MH "Named Groups by Age+" NOT (MH "Middle Age" OR MH "Aged+") | Search modes - Find all my search terms | 595,044 |
| S22 | S20 NOT S21                                                   | Search modes - Find all my search terms | 617     |
| S23 | S22                                                           | Limiters - Published Date: 20170101-    | 78      |
| S24 | S22 AND EM 20170701-                                          | Search modes - Find all my search terms | 66      |
| S25 | S23 OR S24                                                    | Search modes - Find all my search terms | 95      |

## ERIC (10 July 2017)

| Search | Query                                                                                                                                                                                                                                                                                                          | Limiters/Expanders                      | Hits   |
|--------|----------------------------------------------------------------------------------------------------------------------------------------------------------------------------------------------------------------------------------------------------------------------------------------------------------------|-----------------------------------------|--------|
| S1     | DE "Dementia" OR DE "Alzheimers Disease"                                                                                                                                                                                                                                                                       | Search modes - Find all my search terms | 1036   |
| S2     | DE "Cognitive Ability"                                                                                                                                                                                                                                                                                         | Search modes - Find all my search terms | 8133   |
| S3     | dementia OR alzheimer*                                                                                                                                                                                                                                                                                         | Search modes - Find all my search terms | 1286   |
| S4     | ((cognit* OR memory OR mental) N3 (impair* OR decline* OR deficit* OR reduc* OR function*))                                                                                                                                                                                                                    | Search modes - Find all my search terms | 6424   |
| S5     | S1 OR S2 OR S3 OR S4                                                                                                                                                                                                                                                                                           | Search modes - Find all my search terms | 14489  |
| S6     | (DE "Early Intervention" OR DE "Prevention") OR (DE "Preventive Medicine")                                                                                                                                                                                                                                     | Search modes - Find all my search terms | 22132  |
| S7     | TI prevent* OR AB prevent*                                                                                                                                                                                                                                                                                     | Search modes - Find all my search terms | 33142  |
| S8     | TI (protect* OR reduc* OR delay* OR improv*)                                                                                                                                                                                                                                                                   | Search modes - Find all my search terms | 30866  |
| S9     | S6 OR S7 OR S8                                                                                                                                                                                                                                                                                                 | Search modes - Find all my search terms | 71745  |
| S10    | S5 AND S9                                                                                                                                                                                                                                                                                                      | Search modes - Find all my search terms | 828    |
| S11    | DE "Adult Education" OR DE "Adult Basic Education" OR DE "Continuing Education" OR DE "Migrant Adult Education" OR DE "Preretirement Education" OR DE "Public School Adult Education" OR DE "Veterans Education"                                                                                               | Search modes - Find all my search terms | 56528  |
| S12    | DE "Adult Learning" OR DE "Adult Programs" OR DE "Adult Reading Programs" OR DE "High School Equivalency Programs" OR DE "Evening Programs" OR DE "Part Time Students" OR DE "Distance Education" OR DE "Extension Education" OR DE "External Degree Programs" OR DE "Rural Extension" OR DE "Urban Extension" | Search modes - Find all my search terms | 35681  |
| S13    | (DE "Adult Students") OR (DE "Evening Students")                                                                                                                                                                                                                                                               | Search modes - Find all my search terms | 7787   |
| S14    | ((DE "Nonschool Educational Programs") OR (DE "Community Education")) OR (DE "Postsecondary Education" OR DE "Higher Education")                                                                                                                                                                               | Search modes - Find all my search terms | 431319 |

|     |                                                                                                        |                                                 |        |
|-----|--------------------------------------------------------------------------------------------------------|-------------------------------------------------|--------|
| S15 | DE "Continuing Education Units" OR<br>DE "Lifelong Learning"                                           | Search modes - Find all my<br>search terms      | 8046   |
| S16 | TI (learn* OR class OR classes OR<br>course* OR educat* OR school* OR<br>train* OR seminar* OR tutor*) | Search modes - Find all my<br>search terms      | 555016 |
| S17 | TI (cognitiv* N2 (stimulat* OR<br>activit*))                                                           | Search modes - Find all my<br>search terms      | 94     |
| S18 | ((continuing OR adult) N2 (education<br>OR training))                                                  | Search modes - Find all my<br>search terms      | 76187  |
| S19 | "lifelong learning" or "life-long<br>learning"                                                         | Search modes - Find all my<br>search terms      | 10135  |
| S20 | S11 OR S12 OR S13 OR S14 OR S15 OR<br>S16 OR S17 OR S18 OR S19                                         | Search modes - Find all my<br>search terms      | 851728 |
| S21 | S10 AND S20                                                                                            | Search modes - Find all my<br>search terms      | 286    |
| S22 | S21                                                                                                    | Limiters - Date Published:<br>19900101-20171231 | 234    |

**ERIC (8 April 2018)**

| <b>Search</b> | <b>Query</b>                                                                                                                                                                                                                                                                                                   | <b>Limiters/Expanders</b>               | <b>Results</b> |
|---------------|----------------------------------------------------------------------------------------------------------------------------------------------------------------------------------------------------------------------------------------------------------------------------------------------------------------|-----------------------------------------|----------------|
| S1            | DE "Dementia" OR DE "Alzheimers Disease"                                                                                                                                                                                                                                                                       | Search modes - Find all my search terms | 1,075          |
| S2            | DE "Cognitive Ability"                                                                                                                                                                                                                                                                                         | Search modes - Find all my search terms | 8,553          |
| S3            | dementia OR alzheimer*                                                                                                                                                                                                                                                                                         | Search modes - Find all my search terms | 1,332          |
| S4            | ((cognit* OR memory OR mental) N3 (impair* OR decline* OR deficit* OR reduc* OR function*))                                                                                                                                                                                                                    | Search modes - Find all my search terms | 6,684          |
| S5            | S1 OR S2 OR S3 OR S4                                                                                                                                                                                                                                                                                           | Search modes - Find all my search terms | 15,155         |
| S6            | (DE "Early Intervention" OR DE "Prevention") OR (DE "Preventive Medicine")                                                                                                                                                                                                                                     | Search modes - Find all my search terms | 22,911         |
| S7            | TI prevent* OR AB prevent*                                                                                                                                                                                                                                                                                     | Search modes - Find all my search terms | 34,284         |
| S8            | TI (protect* OR reduc* OR delay* OR improv*)                                                                                                                                                                                                                                                                   | Search modes - Find all my search terms | 32,348         |
| S9            | S6 OR S7 OR S8                                                                                                                                                                                                                                                                                                 | Search modes - Find all my search terms | 74,665         |
| S10           | S5 AND S9                                                                                                                                                                                                                                                                                                      | Search modes - Find all my search terms | 873            |
| S11           | DE "Adult Education" OR DE "Adult Basic Education" OR DE "Continuing Education" OR DE "Migrant Adult Education" OR DE "Preretirement Education" OR DE "Public School Adult Education" OR DE "Veterans Education"                                                                                               | Search modes - Find all my search terms | 57,669         |
| S12           | DE "Adult Learning" OR DE "Adult Programs" OR DE "Adult Reading Programs" OR DE "High School Equivalency Programs" OR DE "Evening Programs" OR DE "Part Time Students" OR DE "Distance Education" OR DE "Extension Education" OR DE "External Degree Programs" OR DE "Rural Extension" OR DE "Urban Extension" | Search modes - Find all my search terms | 36,853         |
| S13           | (DE "Adult Students") OR (DE "Evening Students")                                                                                                                                                                                                                                                               | Search modes - Find all my search terms | 8,01           |
| S14           | ((DE "Nonschool Educational Programs") OR (DE "Community Education")) OR (DE "Postsecondary Education" OR DE "Higher Education")                                                                                                                                                                               | Search modes - Find all my search terms | 452,212        |
| S15           | DE "Continuing Education Units" OR DE "Lifelong Learning"                                                                                                                                                                                                                                                      | Search modes - Find all my search terms | 8,311          |
| S16           | TI (learn* OR class OR classes OR course* OR educat* OR school* OR train* OR seminar* OR tutor*)                                                                                                                                                                                                               | Search modes - Find all my search terms | 579,695        |

|     |                                                                                     |                                         |         |
|-----|-------------------------------------------------------------------------------------|-----------------------------------------|---------|
| S17 | T1 (cognitiv* N2 (stimulat* OR activit*))                                           | Search modes - Find all my search terms | 102     |
| S18 | ((continuing OR adult) N2 (education OR training))                                  | Search modes - Find all my search terms | 77,861  |
| S19 | "late life" N2 (activity OR activities OR learn* OR school* OR educat* OR training) | Search modes - Find all my search terms | 17      |
| S20 | "lifelong learning" OR "life-long learning"                                         | Search modes - Find all my search terms | 10,521  |
| S21 | S11 OR S12 OR S13 OR S14 OR S15 OR S16 OR S17 OR S18 OR S19 OR S20                  | Search modes - Find all my search terms | 887,984 |
| S22 | S10 AND S21                                                                         | Search modes - Find all my search terms | 309     |
| S23 | S22                                                                                 | Limiters - Date Published: 20170101-    | 16      |
| S24 | S22 AND EM 20170701-                                                                | Search modes - Find all my search terms | 0       |
| S25 | S23 OR S24                                                                          | Search modes - Find all my search terms | 16      |

## PsycINFO (11 July 2017)

| Search | Query                                                                                                                                                                                          | Limiters/Expanders                           | Results   |
|--------|------------------------------------------------------------------------------------------------------------------------------------------------------------------------------------------------|----------------------------------------------|-----------|
| S1     | DE "Alzheimer's Disease"                                                                                                                                                                       | Search modes - Find all my search terms      | 39,900    |
| S2     | DE "Senile Dementia"                                                                                                                                                                           | Search modes - Find all my search terms      | 1,063     |
| S3     | DE "Cognitive Impairment"                                                                                                                                                                      | Search modes - Find all my search terms      | 30,409    |
| S4     | S1 OR S2 OR S3                                                                                                                                                                                 | Search modes - Find all my search terms      | 65,198    |
| S5     | DE "Prevention" OR DE "Preventive Medicine" OR DE "Primary Mental Health Prevention"                                                                                                           | Search modes - Find all my search terms      | 30,316    |
| S6     | TI prevent* OR AB prevent*                                                                                                                                                                     | Search modes - Find all my search terms      | 186,041   |
| S7     | TI protect* OR reduc* OR delay* OR improv*                                                                                                                                                     | Search modes - Find all my search terms      | 743,335   |
| S8     | S5 OR S6 OR S7                                                                                                                                                                                 | Search modes - Find all my search terms      | 869,214   |
| S9     | S4 AND S8                                                                                                                                                                                      | Search modes - Find all my search terms      | 21,587    |
| S10    | DE "Adult Education" OR DE "Continuing Education"                                                                                                                                              | Search modes - Find all my search terms      | 4,126     |
| S11    | TI (learning OR education OR educational OR training)                                                                                                                                          | Search modes - Find all my search terms      | 259,848   |
| S12    | TI cognitiv* N1 (stimulat* OR activit*)                                                                                                                                                        | Search modes - Find all my search terms      | 751       |
| S13    | "lifelong learning" OR "life-long learning"                                                                                                                                                    | Search modes - Find all my search terms      | 2,995     |
| S14    | (continuing OR adult) N2 (education OR training)                                                                                                                                               | Search modes - Find all my search terms      | 15,241    |
| S15    | S9 AND S11                                                                                                                                                                                     | Search modes - Find all my search terms      | 826       |
| S16    | (ZG "adolescence (13-17 yrs)" or ZG "adulthood (18 yrs & older)" or ZG "childhood (birth-12 yrs)") not (ZG "aged (65 yrs & older)" or ZG "middle age (40-64 yrs)")                             | Search modes - Find all my search terms      | 1,626,731 |
| S17    | S15 NOT S16                                                                                                                                                                                    | Search modes - Find all my search terms      | 683       |
| S18    | (DE "Health Education") OR (DE "Drug Therapy") OR (DE "Animals") OR DE "Animal Models" OR TI (rat OR rats OR mouse OR mice OR dog OR dogs) OR SU (rat OR rats OR mouse OR mice OR dog OR dogs) | Search modes - Find all my search terms      | 454,796   |
| S19    | S17 NOT S18                                                                                                                                                                                    | Search modes - Find all my search terms      | 414       |
| S20    | S17 NOT S18                                                                                                                                                                                    | Limiters - Published Date: 19900101-20171231 | 403       |

## PsycINFO (9 April 2018)

| #   | Query                                                                                       | Limiters/Expanders                      | Results |
|-----|---------------------------------------------------------------------------------------------|-----------------------------------------|---------|
| S1  | DE "Alzheimer's Disease"                                                                    | Search modes - Find all my search terms | 41,992  |
| S2  | DE "Senile Dementia"                                                                        | Search modes - Find all my search terms | 1,063   |
| S3  | DE "Cognitive Impairment"                                                                   | Search modes - Find all my search terms | 32,064  |
| S4  | dementia OR alzheimer*                                                                      | Search modes - Find all my search terms | 99,018  |
| S5  | ((cognit* OR memory OR mental) N3 (impair* OR decline* OR deficit* OR reduc* OR function*)) | Search modes - Find all my search terms | 146,484 |
| S6  | S1 OR S2 OR S3 OR S4 OR S5                                                                  | Search modes - Find all my search terms | 210,638 |
| S7  | DE "Prevention" OR DE "Preventive Medicine" OR DE "Primary Mental Health Prevention"        | Search modes - Find all my search terms | 31,621  |
| S8  | TI prevent* OR AB prevent*                                                                  | Search modes - Find all my search terms | 195,469 |
| S9  | TI protect* OR reduc* OR delay* OR improv*                                                  | Search modes - Find all my search terms | 783,317 |
| S10 | S7 OR S8 OR S9                                                                              | Search modes - Find all my search terms | 914,878 |
| S11 | S6 AND S10                                                                                  | Search modes - Find all my search terms | 71,575  |
| S12 | DE "Cognitive Reserve"                                                                      | Search modes - Find all my search terms | 353     |
| S13 | "Cognitive Reserve"                                                                         | Search modes - Find all my search terms | 985     |
| S14 | S11 OR S12 OR S13                                                                           | Search modes - Find all my search terms | 72,193  |
| S15 | DE "Adult Education" OR DE "Continuing Education"                                           | Search modes - Find all my search terms | 4,2     |
| S16 | TI (learning OR education OR educational OR training)                                       | Search modes - Find all my search terms | 269,992 |
| S17 | TI cognitiv* N1 (stimulat* OR activit*)                                                     | Search modes - Find all my search terms | 794     |
| S18 | "lifelong learning" OR "life-long learning"                                                 | Search modes - Find all my search terms | 3,169   |
| S19 | (continuing OR adult) N2 (education OR training)                                            | Search modes - Find all my search terms | 15,885  |
| S20 | "late life" N2 (activity OR activities OR learn* OR school* OR educat* OR training)         | Search modes - Find all my search terms | 159     |
| S21 | S15 OR S16 OR S17 OR S18 OR S19 OR S20                                                      | Search modes - Find all my search terms | 281,675 |



|     |                                                                                                                                                                                                |                                         |           |
|-----|------------------------------------------------------------------------------------------------------------------------------------------------------------------------------------------------|-----------------------------------------|-----------|
| S22 | S14 AND S21                                                                                                                                                                                    | Search modes - Find all my search terms | 4,549     |
| S23 | (ZG "adolescence (13-17 yrs)" or ZG "adulthood (18 yrs & older)" or ZG "childhood (birth-12 yrs)") not (ZG "aged (65 yrs & older)" or ZG "middle age (40-64 yrs)")                             | Search modes - Find all my search terms | 1,695,649 |
| S24 | S22 NOT S23                                                                                                                                                                                    | Search modes - Find all my search terms | 3,295     |
| S25 | (DE "Health Education") OR (DE "Drug Therapy") OR (DE "Animals") OR DE "Animal Models" OR TI (rat OR rats OR mouse OR mice OR dog OR dogs) OR SU (rat OR rats OR mouse OR mice OR dog OR dogs) | Search modes - Find all my search terms | 465,312   |
| S26 | S24 NOT S25                                                                                                                                                                                    | Search modes - Find all my search terms | 2,094     |
| S27 | S26                                                                                                                                                                                            | Limiters - Publication Year: 2017-      | 276       |
| S28 | S26 AND RD 201707-                                                                                                                                                                             | Search modes - Find all my search terms | 197       |
| S29 | S27 OR S28                                                                                                                                                                                     | Search modes - Find all my search terms | 299       |

### **ClinicalTrials.gov (16 May 2017)**

**280 studies found for:** (prevention OR reduction OR risk OR improvement) AND (dementia OR alzheimer OR "cognitive impairment" OR "cognitive decline") | healthy OR aged OR adult OR cognitive | education OR learning OR lesson OR educational OR class OR mental OR cognitive | Adult, Senior | Studies that accept healthy volunteers

### **ClinicalTrials.gov (9 April 2018)**

**58 Studies found for:** (prevention OR reduction OR risk OR improvement) AND (dementia OR alzheimer OR "cognitive impairment" OR "cognitive decline") | healthy OR aged OR adult OR cognitive | education OR learning OR lesson OR educational OR class OR mental OR cognitive | Adult, Senior | Studies that accept healthy volunteers | First posted from 05/01/2017 to 04/09/2018

## ICTRP (16 May 2017)

| ICTRP    |                                     |                                                                                                                                                              |
|----------|-------------------------------------|--------------------------------------------------------------------------------------------------------------------------------------------------------------|
| Search 1 | 21 records for 20 trials found for: | dementia AND education* AND prevent* OR alzheimer AND education* AND prevent* OR cognitive impairment AND education* AND prevent*                            |
| Search 2 | 3 records for 3 trials found for:   | dementia AND mental activ* AND prevent* OR alzheimer AND mental activ* AND prevent* OR cognitive impairment AND mental activ* AND prevent*                   |
| Search 3 | 3 records for 3 trials found for:   | dementia AND cognitive stimulat* AND prevent* OR alzheimer AND cognitive stimulat* AND prevent* OR cognitive impairment AND cognitive stimulat* AND prevent* |
| Search 4 | 11 records for 11 trials found for: | dementia AND learning AND prevent* OR alzheimer AND learning AND prevent* OR cognitive impairment AND learning AND prevent*                                  |
| Search 5 | No results were found for:          | dementia AND lesson* AND prevent* OR alzheimer AND lesson* AND prevent* OR cognitive impairment AND lesson* AND prevent*                                     |
| Search 6 | 45 records for 45 trials found for: | dementia AND training AND prevent* OR alzheimer AND training AND prevent* OR cognitive impairment AND training AND prevent*                                  |
| SUM      | <b>82</b>                           |                                                                                                                                                              |

## ICTRP (9 April 2018)

|          |     |                                                                                                                                                              |
|----------|-----|--------------------------------------------------------------------------------------------------------------------------------------------------------------|
| Search 1 | 20  | dementia AND education* AND prevent* OR alzheimer AND education* AND prevent* OR cognitive impairment AND education* AND prevent*                            |
| Search 2 | 3   | dementia AND mental activ* AND prevent* OR alzheimer AND mental activ* AND prevent* OR cognitive impairment AND mental activ* AND prevent*                   |
| Search 3 | 5   | dementia AND cognitive stimulat* AND prevent* OR alzheimer AND cognitive stimulat* AND prevent* OR cognitive impairment AND cognitive stimulat* AND prevent* |
| Search 4 | 27  | dementia AND learning AND prevent* OR alzheimer AND learning AND prevent* OR cognitive impairment AND learning AND prevent*                                  |
| Search 5 | 1   | dementia AND lesson* AND prevent* OR alzheimer AND lesson* AND prevent* OR cognitive impairment AND lesson* AND prevent*                                     |
| Search 6 | 64  | dementia AND training AND prevent* OR alzheimer AND training AND prevent* OR cognitive impairment AND training AND prevent*                                  |
| SUM      | 120 |                                                                                                                                                              |

## **ALOIS (15 May 2017)**

ALOIS

---

|            |                                                        |
|------------|--------------------------------------------------------|
| Study Aim: | Cognitive Enhancement (healthy);<br>Primary Prevention |
|------------|--------------------------------------------------------|

---

|                    |                     |
|--------------------|---------------------|
| Intervention type: | Non-pharmacological |
|--------------------|---------------------|

---

|               |                   |                                   |
|---------------|-------------------|-----------------------------------|
| Intervention: | Contains any word | learning education<br>educational |
|---------------|-------------------|-----------------------------------|

---

**18** Studies found

## **ALOIS (9 April 2018)**

Not searched website down

### **DART-Europe (16 May 2017)**

| <b>search</b>                                                                                                                                                         | <b>results</b> |
|-----------------------------------------------------------------------------------------------------------------------------------------------------------------------|----------------|
| (dementia OR alzheimer* OR "cognitive impairment") AND (education* OR "mental activity" OR "mental activities" OR "cognitive stimualtion") AND (prevent* OR improve*) | 43             |

### **DART-Europe (8 April 2018)**

| <b>search</b>                                                                                                                                                         | <b>results</b> |
|-----------------------------------------------------------------------------------------------------------------------------------------------------------------------|----------------|
| (dementia OR alzheimer* OR "cognitive impairment") AND (education* OR "mental activity" OR "mental activities" OR "cognitive stimualtion") AND (prevent* OR improve*) | 56             |
| YEAR: 2017                                                                                                                                                            | 4              |
