# Supplementary material for: Continuing education for the prevention of mild cognitive impairment and Alzheimer’s-type dementia: a systematic review and overview of systematic reviews
Source: PubMed Central journal article supplement — BMJ Open. 2019 Jul 2;9(7):e027719. doi: 10.1136/bmjopen-2018-027719 (PMC6609120; doi:10.1136/bmjopen-2018-027719), 2019-07-02
Supplement: bmjopen-2018-027719supp004.pdf [file bmjopen-2018-027719supp004.pdf]

## Supplementary file 4: Search Strategies of Overview of Systematic Reviews, by database

Medline (via PubMed): 10 July 2017

| #  | Suchen                                                                                                                                                                                                                                                                                                                                                                                                                                                | Ergebnisse |
|----|-------------------------------------------------------------------------------------------------------------------------------------------------------------------------------------------------------------------------------------------------------------------------------------------------------------------------------------------------------------------------------------------------------------------------------------------------------|------------|
| 1  | Dementia/ or exp Alzheimer Disease/                                                                                                                                                                                                                                                                                                                                                                                                                   | 117573     |
| 2  | Cognitive Dysfunction/                                                                                                                                                                                                                                                                                                                                                                                                                                | 5969       |
| 3  | Cognition/                                                                                                                                                                                                                                                                                                                                                                                                                                            | 81563      |
| 4  | (dementia or alzheimer*).ti,ab.                                                                                                                                                                                                                                                                                                                                                                                                                       | 175194     |
| 5  | ((cognit* or memory or mental) adj3 (impair* or decline* or deficit* or reduc* or function*)).ti,ab.                                                                                                                                                                                                                                                                                                                                                  | 167110     |
| 6  | or/1-5                                                                                                                                                                                                                                                                                                                                                                                                                                                | 371089     |
| 7  | exp Leisure Activities/                                                                                                                                                                                                                                                                                                                                                                                                                               | 209051     |
| 8  | leisure.ti,ab.                                                                                                                                                                                                                                                                                                                                                                                                                                        | 13073      |
| 9  | (hobby or hobbies).ti,ab.                                                                                                                                                                                                                                                                                                                                                                                                                             | 1465       |
| 10 | free time.ti,ab.                                                                                                                                                                                                                                                                                                                                                                                                                                      | 1405       |
| 11 | Recreation.ti,ab.                                                                                                                                                                                                                                                                                                                                                                                                                                     | 4826       |
| 12 | (in-door or out-door or indoor or outdoor).ti.                                                                                                                                                                                                                                                                                                                                                                                                        | 8929       |
| 13 | (garden* or horticultur*).ti.                                                                                                                                                                                                                                                                                                                                                                                                                         | 3216       |
| 14 | (play* or game? or gaming).ti.                                                                                                                                                                                                                                                                                                                                                                                                                        | 46562      |
| 15 | (creativ* or painting or drawing or reading).ti.                                                                                                                                                                                                                                                                                                                                                                                                      | 24387      |
| 16 | (voluntary or volunteer* or extracurricular).ti.                                                                                                                                                                                                                                                                                                                                                                                                      | 32266      |
| 17 | or/7-16                                                                                                                                                                                                                                                                                                                                                                                                                                               | 321695     |
| 18 | 6 and 17                                                                                                                                                                                                                                                                                                                                                                                                                                              | 9189       |
| 19 | exp age groups/ not (exp aged/ or middle aged/)                                                                                                                                                                                                                                                                                                                                                                                                       | 3712487    |
| 20 | 18 not 19                                                                                                                                                                                                                                                                                                                                                                                                                                             | 6496       |
| 21 | (systematic or structured or evidence or trials).ti. and ((review or overview or look or examination or update* or summary).ti. or review.pt.)                                                                                                                                                                                                                                                                                                        | 118333     |
| 22 | (0266-4623 or 1469-493X or 1366-5278 or 1530-440X).is.                                                                                                                                                                                                                                                                                                                                                                                                | 15710      |
| 23 | meta-analysis.pt. or Network Meta-Analysis/ or (meta-analys* or meta analys* or metaanalys* or meta synth* or meta-synth* or metasynth*).tw,hw.                                                                                                                                                                                                                                                                                                       | 145368     |
| 24 | review.pt. and ((medline or medlars or embase or pubmed or scisearch or psychinfo or psycinfo or psychlit or psyclit or cinahl or electronic database* or bibliographic database* or computeri#ed database* or online database* or pooling or pooled or mantel haenszel or peto or dersimonian or der simonian or fixed effect or ((hand adj2 search* or (manual* adj2 search*))).tw,hw. or (retraction of publication or retracted publication).pt.) | 117882     |
| 25 | ((systematic or meta) adj2 (analys* or review)).ti,kf. or ((systematic* or quantitativ* or methodologic*) adj5 (review* or overview*)).tw,hw. or (quantitativ\$ adj5 synthesis\$).tw,hw.                                                                                                                                                                                                                                                              | 171997     |

|    |                                                                                                                                                                                               |        |
|----|-----------------------------------------------------------------------------------------------------------------------------------------------------------------------------------------------|--------|
| 26 | (integrative research review* or research integration).tw. or scoping review?.ti,kf. or (review.ti,kf,pt. and (trials as topic or studies as topic).hw.) or (evidence adj3 review*).ti,ab,kf. | 167686 |
| 27 | 21 or 22 or 23 or 24 or 25 or 26                                                                                                                                                              | 412039 |
| 28 | 27 not (case report/ or letter.pt.)                                                                                                                                                           | 401602 |
| 29 | 20 and 28                                                                                                                                                                                     | 243    |
| 30 | remove duplicates from 29                                                                                                                                                                     | 229    |

## Medline (via PubMed): 4 April 2018

| #  | Searches                                                                                                                                                                                                                                                                                                                                                                                                                                               | Results |
|----|--------------------------------------------------------------------------------------------------------------------------------------------------------------------------------------------------------------------------------------------------------------------------------------------------------------------------------------------------------------------------------------------------------------------------------------------------------|---------|
| 1  | Dementia/ or exp Alzheimer Disease/                                                                                                                                                                                                                                                                                                                                                                                                                    | 118622  |
| 2  | Cognitive Dysfunction/                                                                                                                                                                                                                                                                                                                                                                                                                                 | 7904    |
| 3  | Cognition/                                                                                                                                                                                                                                                                                                                                                                                                                                             | 82628   |
| 4  | Cognitive Reserve/                                                                                                                                                                                                                                                                                                                                                                                                                                     | 388     |
| 5  | (dementia or alzheimer*).ti,ab.                                                                                                                                                                                                                                                                                                                                                                                                                        | 179042  |
| 6  | ((cognit* or memory or mental) adj3 (impair* or decline* or deficit* or reduc* or function*)).ti,ab.                                                                                                                                                                                                                                                                                                                                                   | 171766  |
| 7  | or/1-6                                                                                                                                                                                                                                                                                                                                                                                                                                                 | 378437  |
| 8  | exp Leisure Activities/                                                                                                                                                                                                                                                                                                                                                                                                                                | 207917  |
| 9  | leisure.ti,ab.                                                                                                                                                                                                                                                                                                                                                                                                                                         | 13201   |
| 10 | (hobby or hobbies).ti,ab.                                                                                                                                                                                                                                                                                                                                                                                                                              | 1472    |
| 11 | free time.ti,ab.                                                                                                                                                                                                                                                                                                                                                                                                                                       | 1429    |
| 12 | Recreation.ti,ab.                                                                                                                                                                                                                                                                                                                                                                                                                                      | 4900    |
| 13 | (in-door or out-door or indoor or outdoor).ti.                                                                                                                                                                                                                                                                                                                                                                                                         | 9232    |
| 14 | (garden* or horticultur*).ti.                                                                                                                                                                                                                                                                                                                                                                                                                          | 3312    |
| 15 | (play* or game? or gaming).ti.                                                                                                                                                                                                                                                                                                                                                                                                                         | 47658   |
| 16 | (creativ* or painting or drawing or reading).ti.                                                                                                                                                                                                                                                                                                                                                                                                       | 24235   |
| 17 | (voluntary or volunteer* or extracurricular).ti.                                                                                                                                                                                                                                                                                                                                                                                                       | 32218   |
| 18 | (cognitiv* adj2 (activity or activities)).ti.                                                                                                                                                                                                                                                                                                                                                                                                          | 521     |
| 19 | or/8-18                                                                                                                                                                                                                                                                                                                                                                                                                                                | 322366  |
| 20 | 7 and 19                                                                                                                                                                                                                                                                                                                                                                                                                                               | 9826    |
| 21 | exp age groups/ not (exp aged/ or middle aged/)                                                                                                                                                                                                                                                                                                                                                                                                        | 3685197 |
| 22 | 20 not 21                                                                                                                                                                                                                                                                                                                                                                                                                                              | 6996    |
| 23 | (systematic or structured or evidence or trials).ti. and ((review or overview or look or examination or update* or summary).ti. or review.pt.)                                                                                                                                                                                                                                                                                                         | 126873  |
| 24 | (0266-4623 or 1469-493X or 1366-5278 or 1530-440X).is.                                                                                                                                                                                                                                                                                                                                                                                                 | 15689   |
| 25 | meta-analysis.pt. or Network Meta-Analysis/ or (meta-analys* or meta analys* or metaanalys* or meta synth* or meta-synth* or metasynt*).tw,hw.                                                                                                                                                                                                                                                                                                         | 151505  |
| 26 | review.pt. and ((medline or medlars or embase or pubmed or scisearch or psychinfo or psycinfo or psychlit or psyclit or cinahl or electronic database* or bibliographic database* or computeri#ed database* or online database* or pooling or pooled or mantel haenszel or peto or dersimonian or der simonian or fixed effect or ((hand adj2 search*) or (manual* adj2 search*))).tw,hw. or (retraction of publication or retracted publication).pt.) | 125835  |
| 27 | ((systematic or meta) adj2 (analys* or review)).ti,kf. or ((systematic* or quantitativ* or methodologic*) adj5 (review* or overview*)).tw,hw. or (quantitativ\$ adj5 synthesis\$).tw,hw.                                                                                                                                                                                                                                                               | 184250  |

|    |                                                                                                                                                                                               |         |
|----|-----------------------------------------------------------------------------------------------------------------------------------------------------------------------------------------------|---------|
| 28 | (integrative research review* or research integration).tw. or scoping review?.ti,kf. or (review.ti,kf,pt. and (trials as topic or studies as topic).hw.) or (evidence adj3 review*).ti,ab,kf. | 168915  |
| 29 | 23 or 24 or 25 or 26 or 27 or 28                                                                                                                                                              | 425049  |
| 30 | 29 not (case report/ or letter.pt.)                                                                                                                                                           | 414173  |
| 31 | 22 and 30                                                                                                                                                                                     | 283     |
| 32 | ("2017/07*" or "2017/08*" or "2017/09*" or "2017/1*" or 2018*).dt.                                                                                                                            | 947449  |
| 33 | (201707* or 201708* or 201709* or 20171* or 2018*).ed.                                                                                                                                        | 745570  |
| 34 | 32 or 33                                                                                                                                                                                      | 1543513 |
| 35 | 31 and 34                                                                                                                                                                                     | 53      |
| 36 | remove duplicates from 35                                                                                                                                                                     | 52      |

**Embase: 17 Juli 2017**

| <b>No.</b> | <b>Query</b>                                                                                                                                                                         | <b>Results</b> |
|------------|--------------------------------------------------------------------------------------------------------------------------------------------------------------------------------------|----------------|
| #1         | 'alzheimer disease'/exp                                                                                                                                                              | 158632         |
| #2         | 'mild cognitive impairment'/exp                                                                                                                                                      | 17483          |
| #3         | 'dementia'/de                                                                                                                                                                        | 98402          |
| #4         | dementia:ti,ab OR alzheimer*:ti,ab                                                                                                                                                   | 230453         |
| #5         | ((cognit* OR memory OR mental) NEAR/3 (impair* OR decline* OR deficit* OR reduc* OR function*)):ti,ab                                                                                | 226651         |
| #6         | #1 OR #2 OR #3 OR #4 OR #5                                                                                                                                                           | 440912         |
| #7         | 'recreation'/exp                                                                                                                                                                     | 57806          |
| #8         | leisure:ti,ab                                                                                                                                                                        | 16016          |
| #9         | hobby:ti,ab OR hobbies:ti,ab                                                                                                                                                         | 2028           |
| #10        | 'free time':ti,ab                                                                                                                                                                    | 1939           |
| #11        | recreation:ti,ab                                                                                                                                                                     | 6442           |
| #12        | 'in door':ti OR 'out door':ti OR indoor:ti OR outdoor:ti                                                                                                                             | 11551          |
| #13        | garden*:ti OR horticultur*:ti                                                                                                                                                        | 3581           |
| #14        | play*:ti OR game:ti OR games:ti OR gaming:ti                                                                                                                                         | 52543          |
| #15        | creativ*:ti OR painting:ti OR drawing:ti OR reading:ti                                                                                                                               | 25887          |
| #16        | voluntary:ti OR volunteer*:ti OR extracurricular:ti                                                                                                                                  | 38793          |
| #17        | #7 OR #8 OR #9 OR #10 OR #11 OR #12 OR #13 OR #14 OR #15 OR #16                                                                                                                      | 196912         |
| #18        | #6 AND #17                                                                                                                                                                           | 5027           |
| #19        | 'groups by age'/exp AND ('middle aged'/exp OR 'aged'/exp)                                                                                                                            | 3258589        |
| #20        | #18 NOT #19                                                                                                                                                                          | 3277           |
| #21        | systematic review'/exp OR 'meta analysis'/exp                                                                                                                                        | 211886         |
| #22        | meta analys*:ti,ab OR metaanalys*:ti,ab OR 'meta synth*:ti,ab OR metasynt*:ti,ab OR ((systematic* OR quantitativ* OR methodologic*) NEAR/5 (review* OR overview* OR synthes*)):ti,ab | 239389         |
| #23        | systematic:ti OR structured:ti OR evidence:ti OR trials:ti AND (review:ti OR overview:ti OR look:ti OR examination:ti OR update*:ti OR summary:ti)                                   | 98173          |
| #24        | #21 OR #22 OR #23                                                                                                                                                                    | 306796         |
| #25        | #24 NOT ('case report'/exp OR 'case study'/exp)                                                                                                                                      | 301911         |
| #26        | #20 AND #25                                                                                                                                                                          | 128            |

## Embase: 4 April 2018

| No. | Query                                                                                                                                                                                     | Results |
|-----|-------------------------------------------------------------------------------------------------------------------------------------------------------------------------------------------|---------|
| #1  | 'alzheimer disease'/exp                                                                                                                                                                   | 167669  |
| #2  | 'mild cognitive impairment'/exp OR 'dementia'/de                                                                                                                                          | 115768  |
| #3  | 'cognitive reserve'/de                                                                                                                                                                    | 1341    |
| #4  | dementia:ti,ab OR alzheimer*:ti,ab                                                                                                                                                        | 245434  |
| #5  | ((cognit* OR memory OR mental) NEAR/3 (impair* OR decline* OR deficit* OR reduc* OR function*)):ti,ab                                                                                     | 244167  |
| #6  | #1 OR #2 OR #3 OR #4 OR #5                                                                                                                                                                | 470026  |
| #7  | 'recreation'/exp                                                                                                                                                                          | 61588   |
| #8  | leisure:ti,ab                                                                                                                                                                             | 16979   |
| #9  | hobby:ti,ab OR hobbies:ti,ab                                                                                                                                                              | 2145    |
| #10 | 'free time':ti,ab                                                                                                                                                                         | 2061    |
| #11 | recreation:ti,ab                                                                                                                                                                          | 6767    |
| #12 | 'in door':ti OR 'out door':ti OR indoor:ti OR outdoor:ti                                                                                                                                  | 12183   |
| #13 | garden*:ti OR horticultur*:ti                                                                                                                                                             | 3745    |
| #14 | play*:ti OR game:ti OR games:ti OR gaming:ti                                                                                                                                              | 55639   |
| #15 | creativ*:ti OR painting:ti OR drawing:ti OR reading:ti                                                                                                                                    | 26738   |
| #16 | voluntary:ti OR volunteer*:ti OR extracurricular:ti OR ((cognitiv* NEAR/2 (activity OR activities)):ti)                                                                                   | 39956   |
| #17 | #7 OR #8 OR #9 OR #10 OR #11 OR #12 OR #13 OR #14 OR #15 OR #16                                                                                                                           | 207154  |
| #18 | #6 AND #17                                                                                                                                                                                | 5442    |
| #19 | 'groups by age'/exp AND ('middle aged'/exp OR 'aged'/exp)                                                                                                                                 | 345120  |
| #20 | #18 NOT #19                                                                                                                                                                               | 2       |
| #21 | 'systematic review'/exp OR 'meta analysis'/exp                                                                                                                                            | 3533    |
| #22 | 'meta analys*':ti,ab OR metaanalys*:ti,ab OR 'meta synth*':ti,ab OR metasynt*:ti,ab OR (((systematic* OR quantitativ* OR methodologic*) NEAR/5 (review* OR overview* OR synthes*)):ti,ab) | 239710  |
| #23 | (systematic:ti OR structured:ti OR evidence:ti OR trials:ti) AND (review:ti OR overview:ti OR look:ti OR examination:ti OR update*:ti OR summary:ti)                                      | 267896  |
| #24 | #21 OR #22 OR #23                                                                                                                                                                         | 112383  |
| #25 | #24 NOT ('case report'/exp OR 'case study'/exp)                                                                                                                                           | 342728  |
| #26 | #20 AND #25                                                                                                                                                                               | 337160  |
| #27 | #26 AND [1-7-2017]/sd NOT [5-4-2018]/sd                                                                                                                                                   | 145     |
| #28 | #26 AND [2017-2018]/py                                                                                                                                                                    | 26      |
| #29 | #27 OR #28                                                                                                                                                                                | 30      |
|     |                                                                                                                                                                                           | 35      |

## CINAHL (Ebsco): 17 July 2017

| #   | Query                                                                                                                                                                                                  | Limiters/Expanders                      | Results |
|-----|--------------------------------------------------------------------------------------------------------------------------------------------------------------------------------------------------------|-----------------------------------------|---------|
| S1  | (MH "Alzheimer's Disease") OR (MH "Dementia")                                                                                                                                                          | Search modes - Find all my search terms | 38,358  |
| S2  | dementia OR alzheimer*                                                                                                                                                                                 | Search modes - Find all my search terms | 47,332  |
| S3  | ((cognit* OR memory OR mental) N3 (impair* OR decline* OR deficit* OR reduc* OR function*))                                                                                                            | Search modes - Find all my search terms | 30,037  |
| S4  | S1 OR S2 OR S3                                                                                                                                                                                         | Search modes - Find all my search terms | 68,971  |
| S5  | (MH "Leisure Activities+")                                                                                                                                                                             | Search modes - Find all my search terms | 36,998  |
| S6  | leisure OR hobby OR hobbies OR "free time" OR Recreation                                                                                                                                               | Search modes - Find all my search terms | 11,096  |
| S7  | TI in-door OR out-door OR indoor OR outdoor OR garden* OR horticultur* OR play* OR game OR games OR gaming OR creativ* OR painting OR drawing OR reading OR voluntary OR volunteer* OR extracurricular | Search modes - Find all my search terms | 31,628  |
| S8  | S5 OR S6 OR S7                                                                                                                                                                                         | Search modes - Find all my search terms | 69,497  |
| S9  | S4 AND S8                                                                                                                                                                                              | Search modes - Find all my search terms | 2,053   |
| S10 | MH "Animal Studies"                                                                                                                                                                                    | Search modes - Find all my search terms | 41,599  |
| S11 | S9 NOT S10                                                                                                                                                                                             | Search modes - Find all my search terms | 2,051   |
| S12 | MH "Named Groups by Age+" NOT (MH "Middle Age" OR MH "Aged+")                                                                                                                                          | Search modes - Find all my search terms | 564,745 |
| S13 | S11 NOT S12                                                                                                                                                                                            | Search modes - Find all my search terms | 1,855   |
| S14 | (MH "Systematic Review") OR (MH "Meta Analysis")                                                                                                                                                       | Search modes - Find all my search terms | 42,089  |
| S15 | meta-analys* OR meta analys* OR metaanalys* OR meta synth* OR meta-synth* OR metasynth*                                                                                                                | Search modes - Boolean/Phrase           | 31,338  |
| S16 | (systematic* OR quantitativ* OR methodologic*) N4 (review* OR overview* OR synthes*)                                                                                                                   | Search modes - Boolean/Phrase           | 55,272  |
| S17 | TI (systematic OR structured OR evidence OR trials) AND (review OR overview OR look OR examination OR update* OR summary)                                                                              | Search modes - Boolean/Phrase           | 27,392  |
| S18 | S14 OR S15 OR S16 OR S17                                                                                                                                                                               | Search modes - Find all my search terms | 72,333  |
| S19 | S13 AND S18                                                                                                                                                                                            | Search modes - Find all my search terms | 71      |

## CINAHL (Ebsco): 4 April 2018

| #   | Query                                                                                                                                                                                                                                                                               | Limiters/Expanders                      | Results |
|-----|-------------------------------------------------------------------------------------------------------------------------------------------------------------------------------------------------------------------------------------------------------------------------------------|-----------------------------------------|---------|
| S1  | (MH "Alzheimer's Disease")<br>OR (MH "Dementia")                                                                                                                                                                                                                                    | Search modes - Find all my search terms | 40,163  |
| S2  | dementia OR alzheimer*                                                                                                                                                                                                                                                              | Search modes - Find all my search terms | 50,045  |
| S3  | ((cognit* OR memory OR<br>mental) N3 (impair* OR<br>decline* OR deficit* OR<br>reduc* OR function*))                                                                                                                                                                                | Search modes - Find all my search terms | 32,819  |
| S4  | S1 OR S2 OR S3                                                                                                                                                                                                                                                                      | Search modes - Find all my search terms | 73,730  |
| S5  | (MH "Leisure Activities+")                                                                                                                                                                                                                                                          | Search modes - Find all my search terms | 39,894  |
| S6  | leisure OR hobby OR hobbies<br>OR "free time" OR<br>Recreation                                                                                                                                                                                                                      | Search modes - Find all my search terms | 11,740  |
| S7  | TI (in-door OR out-door OR<br>indoor OR outdoor OR<br>garden* OR horticultur* OR<br>play* OR game OR games OR<br>gaming OR creativ* OR<br>painting OR drawing OR<br>reading OR oluntary OR<br>volunteer* OR<br>extracurricular) OR TI<br>(cognitiv* W1 (activity OR<br>activities)) | Search modes - Find all my search terms | 33,266  |
| S8  | S5 OR S6 OR S7                                                                                                                                                                                                                                                                      | Search modes - Find all my search terms | 73,940  |
| S9  | S4 AND S8                                                                                                                                                                                                                                                                           | Search modes - Find all my search terms | 2,298   |
| S10 | MH "Animal Studies"                                                                                                                                                                                                                                                                 | Search modes - Find all my search terms | 43,752  |
| S11 | S9 NOT S10                                                                                                                                                                                                                                                                          | Search modes - Find all my search terms | 2,295   |
| S12 | MH "Named Groups by<br>Age+" NOT (MH "Middle<br>Age" OR MH "Aged+")                                                                                                                                                                                                                 | Search modes - Find all my search terms | 594,058 |
| S13 | S11 NOT S12                                                                                                                                                                                                                                                                         | Search modes - Find all my search terms | 2,079   |
| S14 | (MH "Systematic Review")<br>OR (MH "Meta Analysis")                                                                                                                                                                                                                                 | Search modes - Find all my search terms | 50,503  |
| S15 | meta-analys* OR meta<br>analys* OR metaanalys* OR                                                                                                                                                                                                                                   | Search modes - Boolean/Phrase           | 34,556  |



|     |                                                                                                                                       |                                                                                 |         |
|-----|---------------------------------------------------------------------------------------------------------------------------------------|---------------------------------------------------------------------------------|---------|
|     | meta synth* OR meta-synth*<br>OR metasynt*                                                                                            |                                                                                 |         |
| S16 | (systematic* OR quantitativ*<br>OR methodologic*) N4<br>(review* OR overview* OR<br>synthes*)                                         | Search modes - Boolean/Phrase                                                   | 63,373  |
| S17 | TI (systematic OR structured<br>OR evidence OR trials) AND<br>(review OR overview OR look<br>OR examination OR update*<br>OR summary) | Search modes - Boolean/Phrase                                                   | 30,586  |
| S18 | S14 OR S15 OR S16 OR S17                                                                                                              | Search modes - Find all my search terms                                         | 81,245  |
| S19 | S13 AND S18                                                                                                                           | Search modes - Find all my search terms                                         | 93      |
| S20 |                                                                                                                                       | Limiters - Published Date: 20170701-<br>Search modes - Find all my search terms | 156,794 |
| S21 | EM 20170701-                                                                                                                          | Search modes - Find all my search terms                                         | 208,855 |
| S22 | S20 OR S21                                                                                                                            | Search modes - Find all my search terms                                         | 253,372 |
| S23 | S22 AND S19                                                                                                                           | Search modes - Find all my search terms                                         | 27      |

**PsycINFO (Ebsco): 18 July 2017**

| <b>#</b> | <b>Query</b>                                                                                                                                                                                                                                                                                                                                                                                                         | <b>Limiters/Expanders</b>               | <b>Results</b> |
|----------|----------------------------------------------------------------------------------------------------------------------------------------------------------------------------------------------------------------------------------------------------------------------------------------------------------------------------------------------------------------------------------------------------------------------|-----------------------------------------|----------------|
| S1       | DE "Alzheimer's Disease"                                                                                                                                                                                                                                                                                                                                                                                             | Search modes - Find all my search terms | 39,908         |
| S2       | DE "Senile Dementia"                                                                                                                                                                                                                                                                                                                                                                                                 | Search modes - Find all my search terms | 1,063          |
| S3       | DE "Cognitive Impairment"                                                                                                                                                                                                                                                                                                                                                                                            | Search modes - Find all my search terms | 30,416         |
| S4       | dementia OR alzheimer*                                                                                                                                                                                                                                                                                                                                                                                               | Search modes - Find all my search terms | 94,008         |
| S5       | ((cognit* OR memory OR mental) N3 (impair* OR decline* OR deficit* OR reduc* OR function*))                                                                                                                                                                                                                                                                                                                          | Search modes - Find all my search terms | 138,651        |
| S6       | S1 OR S2 OR S3 OR S4 OR S5                                                                                                                                                                                                                                                                                                                                                                                           | Search modes - Find all my search terms | 200,033        |
| S7       | (((((DE "Leisure Time") OR (DE "Hobbies")) AND (DE "Recreation" OR DE "Clubs (Social Organizations)" OR DE "Traveling" OR DE "Vacationing"))) OR (DE "Gambling")) AND (DE "Games" OR DE "Chess" OR DE "Computer Games"))                                                                                                                                                                                             | Search modes - Find all my search terms | 347            |
| S8       | leisure OR hobby OR hobbies OR "free time" OR Recreation                                                                                                                                                                                                                                                                                                                                                             | Search modes - Find all my search terms | 37,212         |
| S9       | TI (in-door OR out-door OR indoor OR outdoor OR garden* OR horticultur* OR play* OR game OR games OR gaming OR creativ* OR painting OR drawing OR reading OR voluntary OR volunteer* OR extracurricular) OR SU (in-door OR out-door OR indoor OR outdoor OR garden* OR horticultur* OR play* OR game OR games OR gaming OR creativ* OR painting OR drawing OR reading OR voluntary OR volunteer* OR extracurricular) | Search modes - Find all my search terms | 175,457        |
| S10      | S7 OR S8 OR S9                                                                                                                                                                                                                                                                                                                                                                                                       | Search modes - Find all my search terms | 207,264        |
| S11      | S6 AND S10                                                                                                                                                                                                                                                                                                                                                                                                           | Search modes - Find all my search terms | 5,662          |
| S12      | (ZG "adolescence (13-17 yrs)" or ZG "adulthood (18 yrs & older)" or ZG "childhood (birth-12 yrs)") not (ZG "aged (65 yrs & older)" or ZG "middle age (40-64 yrs)")                                                                                                                                                                                                                                                   | Search modes - Find all my search terms | 1,627,211      |
| S13      | S11 NOT S12                                                                                                                                                                                                                                                                                                                                                                                                          | Search modes - Find all my search terms | 3,357          |
| S14      | (DE "Animals") OR TI (rat OR rats OR mouse OR mice OR dog OR dogs) OR SU (rat OR rats OR mouse OR mice OR dog OR dogs)                                                                                                                                                                                                                                                                                               | Search modes - Find all my search terms | 311,593        |
| S15      | S13 NOT S14                                                                                                                                                                                                                                                                                                                                                                                                          | Search modes - Find all my search terms | 3,212          |

|     |                                                                                                                              |                                         |        |
|-----|------------------------------------------------------------------------------------------------------------------------------|-----------------------------------------|--------|
| S16 | (DE "Drug Therapy")                                                                                                          | Search modes - Find all my search terms | 127,11 |
| S17 | S15 NOT S16                                                                                                                  | Search modes - Find all my search terms | 3,161  |
| S18 | DE "Meta Analysis"                                                                                                           | Search modes - Find all my search terms | 4,026  |
| S19 | meta-analys* OR meta analys* OR metaanalys* OR meta synth* OR meta-synth* OR metasynt*                                       | Search modes - Boolean/Phrase           | 27,695 |
| S20 | (systematic* OR quantitativ* OR methodologic*) N4 (review* OR overview* OR synthes*)                                         | Search modes - Find all my search terms | 27,454 |
| S21 | TI (systematic OR structured OR evidence OR trials) AND TI (review OR overview OR look OR examination OR update* OR summary) | Search modes - Find all my search terms | 16,949 |
| S22 | S18 OR S19 OR S20 OR S21                                                                                                     | Search modes - Find all my search terms | 51,681 |
| S23 | S17 AND S22                                                                                                                  | Search modes - Find all my search terms | 73     |

## PsycINFO (Ebsco): 5 April 2018

| #   | Query                                                                                                                                                                                                                                                                                                                                                                                                                                                                      | Limiters/Expanders                      | Results   |
|-----|----------------------------------------------------------------------------------------------------------------------------------------------------------------------------------------------------------------------------------------------------------------------------------------------------------------------------------------------------------------------------------------------------------------------------------------------------------------------------|-----------------------------------------|-----------|
| S1  | DE "Alzheimer's Disease"                                                                                                                                                                                                                                                                                                                                                                                                                                                   | Search modes - Find all my search terms | 41,959    |
| S2  | DE "Senile Dementia" OR DE "Cognitive Impairment"                                                                                                                                                                                                                                                                                                                                                                                                                          | Search modes - Find all my search terms | 33,077    |
| S3  | DE "Cognitive Reserve"                                                                                                                                                                                                                                                                                                                                                                                                                                                     | Search modes - Find all my search terms | 353       |
| S4  | dementia OR alzheimer*                                                                                                                                                                                                                                                                                                                                                                                                                                                     | Search modes - Find all my search terms | 98,945    |
| S5  | ((cognit* OR memory OR mental) N3 (impair* OR decline* OR deficit* OR reduc* OR function*))                                                                                                                                                                                                                                                                                                                                                                                | Search modes - Find all my search terms | 146,379   |
| S6  | S1 OR S2 OR S3 OR S4 OR S5                                                                                                                                                                                                                                                                                                                                                                                                                                                 | Search modes - Find all my search terms | 210,573   |
| S7  | (((((DE "Leisure Time") OR (DE "Hobbies")) AND (DE "Recreation" OR DE "Clubs (Social Organizations)" OR DE "Traveling" OR DE "Vacationing"))) OR (DE "Gambling"))) AND (DE "Games" OR DE "Chess" OR DE "Computer Games"))                                                                                                                                                                                                                                                  | Search modes - Find all my search terms | 358       |
| S8  | leisure OR hobby OR hobbies OR "free time" OR Recreation                                                                                                                                                                                                                                                                                                                                                                                                                   | Search modes - Find all my search terms | 39,017    |
| S9  | TI (in-door OR out-door OR indoor OR outdoor OR garden* OR horticultur* OR play* OR game OR games OR gaming OR creativ* OR painting OR drawing OR reading OR voluntary OR volunteer* OR extracurricular OR (cognitiv* W1 activit*)) OR SU (in-door OR out-door OR indoor OR outdoor OR garden* OR horticultur* OR play* OR game OR games OR gaming OR creativ* OR painting OR drawing OR reading OR voluntary OR volunteer* OR extracurricular OR (cognitiv* W1 activit*)) | Search modes - Find all my search terms | 182,299   |
| S10 | S7 OR S8 OR S9                                                                                                                                                                                                                                                                                                                                                                                                                                                             | Search modes - Find all my search terms | 215,667   |
| S11 | S6 AND S10                                                                                                                                                                                                                                                                                                                                                                                                                                                                 | Search modes - Find all my search terms | 6,166     |
| S12 | (ZG "adolescence (13-17 yrs)" or ZG "adulthood (18 yrs & older)" or ZG "childhood (birth-12 yrs)") not (ZG "aged (65 yrs & older)" or ZG "middle age (40-64 yrs)")                                                                                                                                                                                                                                                                                                         | Search modes - Find all my search terms | 1,695,146 |

|     |                                                                                                                              |                                         |         |
|-----|------------------------------------------------------------------------------------------------------------------------------|-----------------------------------------|---------|
| S13 | S11 NOT S12                                                                                                                  | Search modes - Find all my search terms | 3,706   |
| S14 | (DE "Animals") OR TI (rat OR rats OR mouse OR mice OR dog OR dogs) OR SU (rat OR rats OR mouse OR mice OR dog OR dogs)       | Search modes - Find all my search terms | 318,343 |
| S15 | S13 NOT S14                                                                                                                  | Search modes - Find all my search terms | 3,539   |
| S16 | (DE "Drug Therapy")                                                                                                          | Search modes - Find all my search terms | 129,812 |
| S17 | S15 NOT S16                                                                                                                  | Search modes - Find all my search terms | 3,481   |
| S18 | DE "Meta Analysis"                                                                                                           | Search modes - Find all my search terms | 4,152   |
| S19 | meta-analys* OR meta analys* OR metaanalys* OR meta synth* OR meta-synth* OR metasynt*                                       | Search modes - Boolean/Phrase           | 30,127  |
| S20 | (systematic* OR quantitativ* OR methodologic*) N4 (review* OR overview* OR synthes*)                                         | Search modes - Find all my search terms | 30,748  |
| S21 | TI (systematic OR structured OR evidence OR trials) AND TI (review OR overview OR look OR examination OR update* OR summary) | Search modes - Find all my search terms | 19,166  |
| S22 | S18 OR S19 OR S20 OR S21                                                                                                     | Search modes - Find all my search terms | 56,448  |
| S23 | S17 AND S22                                                                                                                  | Search modes - Find all my search terms | 84      |
| S24 | RD 201707-                                                                                                                   | Search modes - Find all my search terms | 148,956 |
| S25 | DT 201707-                                                                                                                   | Search modes - Find all my search terms | 100,982 |
| S26 | S24 OR S25                                                                                                                   | Search modes - Find all my search terms | 159,715 |
| S27 | S23 AND S26                                                                                                                  | Search modes - Find all my search terms | 13      |

## Epistemonikos 18. Juli 2017

| Search                                                                                                                                                                                                                                                                                                                | Results |
|-----------------------------------------------------------------------------------------------------------------------------------------------------------------------------------------------------------------------------------------------------------------------------------------------------------------------|---------|
| (dementia OR alzheimer* OR cognitiv*) AND (leisure OR recreation OR "free time" OR hobby OR hobbies OR (title:(in-door OR out-door OR indoor OR outdoor OR garden* OR horticultur* OR play* OR game OR games OR gaming OR creativ* OR painting OR drawing OR reading OR voluntary OR volunteer* OR extracurricular))) | 273     |
| Filter: Systematic Review                                                                                                                                                                                                                                                                                             | 64      |

## Epistemonikos 18. Juli 2017

| Search                                                                                                                                                                                                                                                                                                                | Results |
|-----------------------------------------------------------------------------------------------------------------------------------------------------------------------------------------------------------------------------------------------------------------------------------------------------------------------|---------|
| (dementia OR alzheimer* OR cognitiv*) AND (leisure OR recreation OR "free time" OR hobby OR hobbies OR (title:(in-door OR out-door OR indoor OR outdoor OR garden* OR horticultur* OR play* OR game OR games OR gaming OR creativ* OR painting OR drawing OR reading OR voluntary OR volunteer* OR extracurricular))) | 368     |
| Filter: Systematic Review                                                                                                                                                                                                                                                                                             | 146     |
| Added to database: 01-07-17 to 05-04-18                                                                                                                                                                                                                                                                               | 25      |

## Cochrane Library: 18. Juli 2017

| ID  | Search                                                                                                                  | Hits   |
|-----|-------------------------------------------------------------------------------------------------------------------------|--------|
| #1  | [mh ^Dementia] or [mh "Alzheimer Disease"]                                                                              | 4053   |
| #2  | [mh ^"Cognitive Dysfunction"]                                                                                           | 181    |
| #3  | [mh ^Cognition]                                                                                                         | 6276   |
| #4  | (dementia or alzheimer*):ti,ab,kw                                                                                       | 11879  |
| #5  | ((cognit* or memory or mental) next (impair* or decline* or deficit* or reduc* or function*)):ti,ab,kw                  | 12722  |
| #6  | {or #1-#5}                                                                                                              | 25014  |
| #7  | [mh "Leisure Activities"]                                                                                               | 15395  |
| #8  | leisure:ti,ab,kw                                                                                                        | 1481   |
| #9  | (hobby or hobbies):ti,ab,kw                                                                                             | 55     |
| #10 | "free time":ti,ab,kw                                                                                                    | 162    |
| #11 | Recreation:ti,ab,kw                                                                                                     | 615    |
| #12 | (in-door or out-door or indoor or outdoor):ti,kw                                                                        | 478    |
| #13 | (garden* or horticultur*):ti,kw                                                                                         | 106    |
| #14 | (play* or game* or gaming):ti,kw                                                                                        | 3280   |
| #15 | (creativ* or painting or drawing or reading):ti,kw                                                                      | 2913   |
| #16 | (voluntary or volunteer* or extracurricular):ti,kw                                                                      | 17942  |
| #17 | {or #7-#16}                                                                                                             | 39978  |
| #18 | #6 and #17                                                                                                              | 1551   |
| #19 | [mh "age groups"] not ([mh aged] or [mh "middle aged"])                                                                 | 104634 |
| #20 | #18 not #19 in Cochrane Reviews (Reviews and Protocols), Other Reviews, Technology Assessments and Economic Evaluations | 38     |

## Cochrane Library: 5. April 2018

| ID  | Search                                                                                                 | Hits  |
|-----|--------------------------------------------------------------------------------------------------------|-------|
| #1  | [mh ^Dementia] or [mh "Alzheimer Disease"]                                                             | 4263  |
| #2  | [mh ^"Cognitive Dysfunction"]                                                                          | 450   |
| #3  | [mh ^Cognition]                                                                                        | 6675  |
| #4  | [mh ^"Cognitive Reserve"]                                                                              | 8     |
| #5  | (dementia or alzheimer*):ti,ab,kw                                                                      | 13099 |
| #6  | ((cognit* or memory or mental) next (impair* or decline* or deficit* or reduc* or function*)):ti,ab,kw | 14315 |
| #7  | {or #1-#6}                                                                                             | 27581 |
| #8  | [mh "Leisure Activities"]                                                                              | 16504 |
| #9  | leisure:ti,ab,kw                                                                                       | 1683  |
| #10 | (hobby or hobbies):ti,ab,kw                                                                            | 59    |
| #11 | free time:ti,ab,kw                                                                                     | 169   |
| #12 | Recreation:ti,ab,kw                                                                                    | 674   |
| #13 | (in-door or out-door or indoor or outdoor):ti,kw                                                       | 541   |

|     |                                                                                                                        |        |
|-----|------------------------------------------------------------------------------------------------------------------------|--------|
| #14 | (garden* or horticultur*):ti,kw                                                                                        | 125    |
| #15 | (play* or game* or gaming):ti,kw                                                                                       | 3653   |
| #16 | (creativ* or painting or drawing or reading):ti,kw                                                                     | 3482   |
| #17 | (voluntary or volunteer* or extracurricular):ti,kw                                                                     | 20037  |
| #18 | (cognitiv* near/2 (activity or activities)):ti,kw                                                                      | 80     |
| #19 | {or #8-#18}                                                                                                            | 44252  |
| #20 | #7 and #19                                                                                                             | 1838   |
| #21 | [mh "age groups"] not ([mh aged] or [mh "middle aged"])                                                                | 109483 |
| #22 | #20 not #21 Publication Year from 2017 to 2018, in Cochrane Reviews (Reviews and Protocols) and Technology Assessments | 1      |
