# Supplementary material for: Continuing education for the prevention of mild cognitive impairment and Alzheimer’s-type dementia: a systematic review and overview of systematic reviews
Source: PubMed Central journal article supplement — BMJ Open. 2019 Jul 2;9(7):e027719. doi: 10.1136/bmjopen-2018-027719 (PMC6609120; doi:10.1136/bmjopen-2018-027719), 2019-07-02
Supplement: bmjopen-2018-027719supp007.pdf [file bmjopen-2018-027719supp007.pdf]

## GRADE of Recommendations:

### Cognitive leisure activities compared to no cognitive leisure activities for the prevention of dementia (OPDEBEEK et al.)

**Patient or population:** over 60 years, non-demented adults at baseline

**Intervention:** cognitive leisure activities

**Comparison:** no cognitive leisure activities

| Outcomes                      | Anticipated absolute effects* (95% CI)          |                                                                                                                  | Relative effect (95% CI) | No of participants (studies) | Certainty of the evidence (GRADE) | Comments |
|-------------------------------|-------------------------------------------------|------------------------------------------------------------------------------------------------------------------|--------------------------|------------------------------|-----------------------------------|----------|
|                               | Risk with no cognitive leisure activities       | Risk with cognitive leisure activities                                                                           |                          |                              |                                   |          |
| Overall cognitive functioning | The mean overall cognitive functioning was 0 SD | The mean overall cognitive functioning in the intervention group was 0,26 SD higher (0,21 higher to 0,31 higher) | -                        | (31 observational studies)   | ⊕○○○<br>VERY LOW <sup>a,b</sup>   |          |

\*The risk in the intervention group (and its 95% confidence interval) is based on the assumed risk in the comparison group and the **relative effect** of the intervention (and its 95% CI).

CI: Confidence interval; MD: Mean difference

#### GRADE Working Group grades of evidence

**High certainty:** We are very confident that the true effect lies close to that of the estimate of the effect

**Moderate certainty:** We are moderately confident in the effect estimate: The true effect is likely to be close to the estimate of the effect, but there is a possibility that it is substantially different

**Low certainty:** Our confidence in the effect estimate is limited: The true effect may be substantially different from the estimate of the effect

**Very low certainty:** We have very little confidence in the effect estimate: The true effect is likely to be substantially different from the estimate of effect

#### Explanations

a. I<sup>2</sup> = 94%, b. Interventions vary between studies

## Video Games compared to no Video Games for the prevention of dementia (TORIL et al.)

**Patient or population:** 50-86 years, healthy older adults

**Intervention:** Video Games

**Comparison:** no Video Games

| Outcomes           | Anticipated absolute effects* (95% CI) |                       | Relative effect (95% CI) | No of participants (studies)      | Certainty of the evidence (GRADE) | Comments |
|--------------------|----------------------------------------|-----------------------|--------------------------|-----------------------------------|-----------------------------------|----------|
|                    | Risk with no Video Games               | Risk with Video Games |                          |                                   |                                   |          |
| Cognitive Function | -                                      | -                     | -                        | 913<br>(20 observational studies) | ⊕○○○<br>VERY LOW <sup>a</sup>     |          |

\*The risk in the intervention group (and its 95% confidence interval) is based on the assumed risk in the comparison group and the **relative effect** of the intervention (and its 95% CI).

CI: Confidence interval; SMD: Standardised mean difference

### GRADE Working Group grades of evidence

**High certainty:** We are very confident that the true effect lies close to that of the estimate of the effect

**Moderate certainty:** We are moderately confident in the effect estimate: The true effect is likely to be close to the estimate of the effect, but there is a possibility that it is substantially different

**Low certainty:** Our confidence in the effect estimate is limited: The true effect may be substantially different from the estimate of the effect

**Very low certainty:** We have very little confidence in the effect estimate: The true effect is likely to be substantially different from the estimate of effect

### Explanations

a. Mixing various different interventions and study designs

## Cognitive leisure activities compared to no cognitive leisure activities for healthy older adults (YATES et al.)

**Patient or population:** over 46 years, healthy older adults, **Intervention:** cognitive leisure activities, **Comparison:** no cognitive leisure activities

| Outcomes                          | Anticipated absolute effects* (95% CI)    |                                        | Relative effect (95% CI)            | No of participants (studies)                    | Certainty of the evidence (GRADE) | Comments |
|-----------------------------------|-------------------------------------------|----------------------------------------|-------------------------------------|-------------------------------------------------|-----------------------------------|----------|
|                                   | Risk with no cognitive leisure activities | Risk with cognitive leisure activities |                                     |                                                 |                                   |          |
| Incidence of AD                   | 0 per 1.000                               | <b>0 per 1.000</b><br>(0 to 0)         | <b>RR 0.610</b><br>(0.418 to 0.900) | (3 observational studies)                       | ⊕○○○<br>VERY LOW <sup>a,b</sup>   |          |
| Incidence of AD                   | 0 per 1.000                               | <b>NaN per 1.000</b><br>(NaN to NaN)   | <b>HR 0.584</b><br>(0.462 to 0.739) | (2 observational studies)                       | ⊕○○○<br>VERY LOW <sup>b</sup>     |          |
| Incidence of AD                   | <b>Low</b>                                |                                        | <b>OR 0.775</b><br>(0.668 to 0.899) | 0 cases 0 controls<br>(2 observational studies) | ⊕○○○<br>VERY LOW <sup>b,c</sup>   |          |
|                                   | 0 per 1.000                               | <b>0 per 1.000</b><br>(0 to 0)         |                                     |                                                 |                                   |          |
| Incidence of cognitive impairment | 0 per 1.000                               | <b>0 per 1.000</b><br>(0 to 0)         | <b>OR 0.685</b><br>(0.550 to 0.845) | (5 observational studies)                       | ⊕○○○<br>VERY LOW <sup>b</sup>     |          |
| Incidence of cognitive impairment | 0 per 1.000                               | <b>NaN per 1.000</b><br>(NaN to NaN)   | <b>HR 0.853</b><br>(0.711 to 1.022) | (3 observational studies)                       | ⊕○○○<br>VERY LOW <sup>b,c</sup>   |          |

\*The risk in the intervention group (and its 95% confidence interval) is based on the assumed risk in the comparison group and the **relative effect** of the intervention (and its 95% CI).

CI: Confidence interval; RR: Risk ratio; HR: Hazard Ratio; OR: Odds ratio

### Explanations

a. moderate heterogeneity,  $\chi^2$  test  $p=0.09$ , b. differences in interventions (definition of cognitive leisure activities varies across studies), c. high heterogeneity,  $\chi^2$  test  $p=0.00$ , confidence intervals do not overlap
